# Supplementary material for: Exploring transcription factors reveals crucial members and regulatory networks involved in different abiotic stresses in Brassica napus L
Source: PubMed Central journal article supplement (PMC6146658; doi:10.1186/s12870-018-1417-z), 2018-09-19
Supplement: 12870_2018_1417_MOESM2_ESM.pdf [file 12870_2018_1417_MOESM2_ESM.pdf]

**Additional file 2: The identified TFs in *B. napus*, *B. rapa*, *B. oleracea* and *A. thaliana***

| The identified five families of TFs in <i>B. napus</i> |               |         |               |           |               |           |               |           |               |
|--------------------------------------------------------|---------------|---------|---------------|-----------|---------------|-----------|---------------|-----------|---------------|
| Subfamily                                              | BnaP2/EREBP   | SubfamI | BnbZIP        | Subfamily | BnMYB         | Subfamily | BnNAC         | Subfamily | BnWRKY        |
| DREB_A-5                                               | BnaA07g21980D | XII     | BnaA03g05670D | 1R-MYB    | BnaC08g48430D | XVII      | BnaA09g47260D | GroupII-c | BnaA06g23750D |
| DREB_A-6                                               | BnaA08g13860D | XII     | BnaC03g07230D | R2R3-MYB  | BnaA03g06730D | XVII      | BnaC08g41360D | GroupII-c | BnaC08g11240D |
| DREB_A-4                                               | BnaA05g04450D | XII     | BnaC03g07400D | 1R-MYB    | BnaA05g12950D | XVII      | BnaC08g15440D | GroupII-c | BnaC08g10370D |
| ERF_B-1                                                | BnaA08g19170D | XII     | BnaA02g02830D | R2R3-MYB  | BnaA04g10290D | XVII      | BnaA08g24840D | GroupIII  | BnaA02g05730D |
| ERF_B-6                                                | BnaCnng57070D | XII     | BnaC02g06270D | R2R3-MYB  | BnaA03g17580D | XVII      | BnaC05g09630D | GroupII-c | BnaA04g26970D |
| ERF_B-3                                                | BnaC05g04210D | XII     | BnaC09g42010D | R2R3-MYB  | BnaC06g43380D | XVII      | BnaA06g08290D | GroupI    | BnaCnng68630D |
| AP2                                                    | BnaA02g03590D | XII     | BnaA10g18440D | R2R3-MYB  | BnaC02g00420D | XVII      | BnaC09g13140D | GroupI    | BnaA04g22040D |
| ERF_B-5                                                | BnaAnng35170D | XII     | BnaC02g38190D | 1R-MYB    | BnaA03g13950D | XVII      | BnaA09g12800D | GroupII-c | BnaA09g07010D |
| DREB_A-2                                               | BnaCnng75020D | XII     | BnaA06g39730D | 1R-MYB    | BnaA06g11800D | XVI       | BnaA09g06060D | GroupII-e | BnaCnng22580D |
| DREB_A-4                                               | BnaA04g25970D | XII     | BnaC07g26080D | R2R3-MYB  | BnaC09g01940D | XVI       | BnaC09g05610D | GroupII-c | BnaC07g49530D |
| ERF_B-1                                                | BnaC02g05060D | XII     | BnaA02g20110D | R2R3-MYB  | BnaA08g08440D | XVI       | BnaA02g33380D | GroupII-c | BnaA06g40630D |
| DREB_A-5                                               | BnaA08g21260D | XII     | BnaA06g08590D | 1R-MYB    | BnaA09g44370D | XVI       | BnaC03g74980D | GroupII-b | BnaCnng21680D |
| ERF_B-4                                                | BnaCnng24520D | XII     | BnaC01g30400D | 1R-MYB    | BnaC03g70060D | XVI       | BnaA06g21810D | GroupIII  | BnaA09g05000D |
| DREB_A-5                                               | BnaA07g12040D | XII     | BnaC08g40240D | 1R-MYB    | BnaA04g24320D | XV        | BnaC07g16780D | GroupI    | BnaA02g36910D |
| DREB_A-6                                               | BnaA04g12700D | XII     | BnaC09g22200D | 1R-MYB    | BnaAnng36570D | XV        | BnaA07g12690D | GroupII-d | BnaC04g36310D |
| DREB_A-4                                               | BnaC04g44720D | XII     | BnaA09g19470D | 1R-MYB    | BnaC02g46900D | XV        | BnaA07g02060D | GroupII-c | BnaCnng26190D |
| ERF                                                    | BnaC08g08940D | XII     | BnaA02g27460D | 1R-MYB    | BnaA08g00770D | XV        | BnaAnng08430D | GroupII-c | BnaC06g07320D |
| ERF_B-1                                                | BnaA05g24390D | XII     | BnaC02g35400D | 1R-MYB    | BnaC02g07210D | XV        | BnaC07g46020D | GroupII-b | BnaC03g29850D |
| DREB_A-4                                               | BnaA08g12010D | XII     | BnaCnng73390D | 1R-MYB    | BnaC05g30570D | XV        | BnaC01g02440D | GroupII-b | BnaA09g44440D |
| ERF_B-6                                                | BnaA10g21280D | XII     | BnaA06g33560D | R2R3-MYB  | BnaA10g16980D | XV        | BnaA01g01440D | GroupII-c | BnaCnng28950D |
| DREB_A-4                                               | BnaA05g23420D | XI      | BnaA02g14100D | R2R3-MYB  | BnaC08g24310D | XV        | BnaC01g02450D | GroupII-b | BnaA02g35700D |
| ERF_B-3                                                | BnaA06g35500D | XI      | BnaC02g18730D | 1R-MYB    | BnaC03g65090D | XIV       | BnaA02g15660D | GroupIII  | BnaAnng38320D |
| DREB_A-4                                               | BnaC04g50030D | X       | BnaA09g39870D | R2R3-MYB  | BnaAnng06630D | XIV       | BnaC02g20880D | GroupII-b | BnaA09g00350D |
| DREB_A-5                                               | BnaA07g32160D | X       | BnaC08g32220D | 1R-MYB    | BnaA01g21820D | XIV       | BnaA07g29730D | GroupII-b | BnaA02g26030D |
| ERF_B-3                                                | BnaC02g01530D | X       | BnaC06g18530D | 1R-MYB    | BnaA02g15320D | XIV       | BnaC06g32940D | GroupIII  | BnaC03g22830D |
| RAV                                                    | BnaC06g03910D | X       | BnaA07g19330D | R2R3-MYB  | BnaC03g51750D | XIII      | BnaA05g17950D | GroupIII  | BnaC03g22840D |
| ERF_B-1                                                | BnaC07g10480D | X       | BnaA07g21710D | 1R-MYB    | BnaC03g01040D | XIII      | BnaC05g28390D | GroupIII  | BnaCnng74680D |
| ERF_B-4                                                | BnaAnng13660D | X       | BnaC06g22430D | R2R3-MYB  | BnaAnng06640D | XIII      | BnaC05g24890D | GroupIII  | BnaAnng39080D |
| ERF_B-4                                                | BnaA02g01570D | X       | BnaCnng21800D | R2R3-MYB  | BnaAnng23930D | XIII      | BnaA09g24190D | GroupI    | BnaA08g12810D |
| RAV                                                    | BnaC02g18650D | X       | BnaA02g17180D | 1R-MYB    | BnaA09g55480D | XIII      | BnaC04g00680D | GroupII-d | BnaA08g12420D |
| AP2                                                    | BnaA01g00290D | X       | BnaC06g01290D | R2R3-MYB  | BnaA09g02730D | XIII      | BnaA05g01110D | GroupII-c | BnaC04g49810D |
| ERF_B-3                                                | BnaC08g03640D | X       | BnaA06g25370D | R2R3-MYB  | BnaA08g29930D | XIII      | BnaC04g51650D | GroupII-c | BnaCnng75330D |
| DREB_A-6                                               | BnaC08g08930D | X       | BnaA07g01890D | R2R3-MYB  | BnaCnng61660D | XIII      | BnaAnng41940D | GroupII-c | BnaAnng39820D |
| ERF_B-4                                                | BnaC09g43740D | X       | BnaC09g09660D | R2R3-MYB  | BnaCnng19930D | XIII      | BnaA09g39480D | GroupIII  | BnaC04g01540D |
| ERF_B-6                                                | BnaA03g48270D | X       | BnaA09g09500D | 1R-MYB    | BnaC07g48440D | XIII      | BnaC08g31830D | GroupII-d | BnaC03g17030D |
| ERF_B-3                                                | BnaCnng09130D | X       | BnaA10g13430D | R2R3-MYB  | BnaC06g30790D | XIII      | BnaC06g18290D | GroupI    | BnaCnng16740D |
| ERF_B-1                                                | BnaC08g40860D | X       | BnaC03g65930D | 1R-MYB    | BnaAnng03960D | XIII      | BnaC06g13570D | GroupII-c | BnaA08g29320D |
| DREB_A-4                                               | BnaC03g15720D | X       | BnaA08g11080D | R2R3-MYB  | BnaA06g15640D | XIII      | BnaA07g19100D | GroupII-e | BnaC01g15320D |
| DREB_A-4                                               | BnaC09g45000D | X       | BnaA03g52920D | R2R3-MYB  | BnaA02g03170D | XII       | BnaA07g35010D | GroupIII  | BnaC04g55610D |
| ERF                                                    | BnaA09g54740D | X       | BnaC07g45120D | R2R3-MYB  | BnaC03g29670D | XII       | BnaC06g39940D | GroupII-c | BnaCnng7260D  |
| ERF_B-5                                                | BnaA03g12320D | X       | BnaA01g02570D | 1R-MYB    | BnaA08g29620D | XII       | BnaC02g25890D | GroupII-b | BnaA03g59960D |
| AP2                                                    | BnaC03g48820D | X       | BnaC01g03810D | R2R3-MYB  | BnaC07g37430D | XII       | BnaAnng39480D | GroupII-c | BnaC02g40180D |
| DREB_A-2                                               | BnaAnng23490D | IX      | BnaC09g15210D | 1R-MYB    | BnaC01g01430D | XII       | BnaCnng69540D | GroupIII  | BnaA02g21850D |
| ERF_B-5                                                | BnaA01g13420D | IX      | BnaAnng23880D | R2R3-MYB  | BnaC08g29670D | XII       | BnaAnng32450D | GroupII-d | BnaA01g34790D |
| ERF                                                    | BnaC06g40770D | IX      | BnaCnng60880D | R2R3-MYB  | BnaC06g35510D | XI        | BnaCnng40940D | GroupII-e | BnaC05g23680D |
| ERF_B-3                                                | BnaA08g08310D | IX      | BnaC08g21370D | R2R3-MYB  | BnaC02g41860D | XI        | BnaC03g28970D | GroupII-c | BnaC03g70660D |
| DREB_A-4                                               | BnaAnng37500D | IX      | BnaCnng21630D | R2R3-MYB  | BnaCnng29520D | XI        | BnaA03g24360D | GroupII-c | BnaC09g11790D |
| ERF_B-3                                                | BnaCnng05080D | IX      | BnaAnng05020D | R2R3-MYB  | BnaCnng21270D | X         | BnaC03g73730D | GroupII-c | BnaAnng41650D |
| ERF_B-5                                                | BnaA02g10340D | IX      | BnaUnng03790D | R2R3-MYB  | BnaA02g13730D | X         | BnaA03g32550D | GroupII-c | BnaC06g11020D |
| AP2                                                    | BnaA07g12050D | IX      | BnaA01g00310D | R2R3-MYB  | BnaA10g24770D | X         | BnaA05g26240D | GroupII-c | BnaA09g26610D |
| ERF_B-6                                                | BnaC08g16630D | IX      | BnaC01g01320D | 1R-MYB    | BnaC08g18480D | X         | BnaC05g40360D | GroupII-b | BnaA06g13050D |
| ERF_B-3                                                | BnaA06g40170D | IX      | BnaA03g54260D | 1R-MYB    | BnaCnng35720D | X         | BnaC03g70990D | GroupI    | BnaCnng39610D |
| ERF_B-5                                                | BnaA03g46240D | IX      | BnaC07g46750D | 1R-MYB    | BnaA03g12550D | X         | BnaA08g00130D | GroupII-c | BnaCnng39880D |
| ERF_B-6                                                | BnaC02g35790D | VIII    | BnaC07g27220D | 1R-MYB    | BnaA08g13950D | X         | BnaC01g09890D | GroupII-c | BnaCnng39890D |
| DREB_A-4                                               | BnaCnng77210D | VIII    | BnaA06g29500D | 1R-MYB    | BnaAnng39140D | X         | BnaA01g08340D | GroupIII  | BnaC09g36400D |
| AP2                                                    | BnaC02g21480D | VIII    | BnaA09g03330D | R2R3-MYB  | BnaC08g38370D | X         | BnaA03g58970D | GroupII-e | BnaA02g10650D |
| DREB_A-5                                               | BnaAnng28960D | VIII    | BnaC09g02690D | 1R-MYB    | BnaA02g03510D | X         | BnaC07g41390D | GroupIII  | BnaA09g35840D |
| DREB_A-4                                               | BnaA10g20950D | VII     | BnaCnng29250D | R2R3-MYB  | BnaC09g05060D | X         | BnaA08g13670D | GroupIII  | BnaCnng41380D |
| AP2                                                    | BnaA02g08130D | VII     | BnaC08g25370D | R2R3-MYB  | BnaA07g25800D | X         | BnaC08g13100D | GroupII-c | BnaC04g51410D |
| DREB_A-2                                               | BnaC04g53380D | VII     | BnaA09g34460D | 1R-MYB    | BnaA10g10220D | IX        | BnaA09g41400D | GroupII-c | BnaA09g55920D |
| ERF_B-6                                                | BnaA06g33270D | VII     | BnaC03g21720D | R2R3-MYB  | BnaC07g46430D | IX        | BnaC08g34030D | GroupII-b | BnaCnng42630D |
| ERF_B-6                                                | BnaA08g23880D | VII     | BnaA03g18190D | R2R3-MYB  | BnaA06g03350D | IX        | BnaC04g36420D | GroupII-b | BnaCnng05780D |
| DREB_A-5                                               | BnaA07g10800D | VII     | BnaA04g27730D | R2R3-MYB  | BnaA04g10300D | IX        | BnaA04g14380D | GroupII-d | BnaA04g17690D |
| ERF_B-3                                                | BnaC08g31500D | VII     | BnaC06g15330D | R2R3-MYB  | BnaA05g29580D | IX        | BnaC05g38460D | GroupI    | BnaA04g17420D |
| AP2                                                    | BnaA07g13990D | VII     | BnaC09g00090D | R2R3-MYB  | BnaC07g24710D | IX        | BnaC04g34520D | GroupIII  | BnaCnng45760D |
| DREB_A-2                                               | BnaC02g08060D | VII     | BnaA09g00980D | 1R-MYB    | BnaC06g24140D | IX        | BnaA03g33770D | GroupII-c | BnaA04g25840D |
| DREB_A-4                                               | BnaA03g52210D | VII     | BnaA02g31000D | R2R3-MYB  | BnaA05g32240D | IX        | BnaC03g38960D | GroupI    | BnaA05g34850D |
| ERF_B-5                                                | BnaCnng73120D | VII     | BnaC02g39310D | 1R-MYB    | BnaC02g27660D | IX        | BnaC01g36350D | GroupII-c | BnaA02g34400D |
| RAV                                                    | BnaCnng37790D | VII     | BnaC07g27440D | 1R-MYB    | BnaA01g37390D | IX        | BnaA01g28990D | GroupI    | BnaA05g12160D |
| DREB_A-4                                               | BnaC03g19550D | VII     | BnaA06g29270D | R2R3-MYB  | BnaA04g10190D | IX        | BnaA02g09970D | GroupII-d | BnaA05g11870D |
| ERF_B-2                                                | BnaAnng20420D | VII     | BnaC07g29750D | R2R3-MYB  | BnaA04g18810D | IX        | BnaC02g13890D | GroupII-e | BnaA03g46020D |
| ERF_B-1                                                | BnaC03g41530D | VII     | BnaA06g27230D | 1R-MYB    | BnaAnng30810D | IX        | BnaA02g18100D | GroupIII  | BnaA03g46280D |
| ERF_B-3                                                | BnaA01g02720D | VII     | BnaC02g41050D | R2R3-MYB  | BnaA01g11280D | IX        | BnaC02g24050D | GroupII-d | BnaA03g46550D |
| ERF_B-4                                                | BnaA10g23760D | VII     | BnaA02g32330D | 1R-MYB    | BnaA07g11710D | IX        | BnaA07g32710D | GroupII-c | BnaA09g39820D |

|          |               |     |               |          |               |      |               |           |               |
|----------|---------------|-----|---------------|----------|---------------|------|---------------|-----------|---------------|
| ERF_B-5  | BnaA03g24540D | VII | BnaCnng21210D | R2R3-MYB | BnaA08g10420D | IX   | BnaC06g37170D | GroupII-b | BnaC06g30870D |
| ERF_B-3  | BnaA01g09230D | VII | BnaA03g39740D | R2R3-MYB | BnaA03g10180D | IX   | BnaA01g26760D | GroupIII  | BnaC06g15910D |
| ERF      | BnaA02g06490D | VII | BnaC02g41810D | 1R-MYB   | BnaA04g01380D | IX   | BnaCnng63190D | GroupII-c | BnaA10g10500D |
| ERF_B-2  | BnaA05g23130D | VII | BnaAnng06600D | R2R3-MYB | BnaA02g01290D | IX   | BnaCnng55590D | GroupII-c | BnaA09g16360D |
| DREB_A-5 | BnaC01g07340D | VII | BnaA09g05450D | R2R3-MYB | BnaCnng62710D | IX   | BnaCnng60050D | GroupII-c | BnaA06g36020D |
| ERF      | BnaC03g23470D | VII | BnaC09g05030D | R2R3-MYB | BnaA09g56310D | IX   | BnaCnng66480D | GroupI    | BnaA09g45940D |
| ERF      | BnaC09g35430D | VII | BnaUnng01680D | R2R3-MYB | BnaA10g22930D | IX   | BnaAnng11180D | GroupII-d | BnaA02g31030D |
| DREB_A-1 | BnaAnng34260D | VII | BnaA03g02360D | R2R3-MYB | BnaA07g30860D | IX   | BnaC03g40490D | GroupII-c | BnaA09g11350D |
| DREB_A-6 | BnaC05g17550D | VII | BnaC04g01070D | R2R3-MYB | BnaA03g32470D | IX   | BnaA03g07000D | GroupIII  | BnaCnng52600D |
| DREB_A-2 | BnaC04g55440D | VII | BnaA05g01520D | R2R3-MYB | BnaC07g34790D | IX   | BnaC03g08880D | GroupII-c | BnaA09g17960D |
| ERF_B-5  | BnaC07g41100D | VII | BnaC03g25660D | R2R3-MYB | BnaA03g53110D | IX   | BnaA02g04040D | GroupIII  | BnaA03g19190D |
| ERF_B-3  | BnaA01g23940D | VII | BnaA09g00170D | 1R-MYB   | BnaC09g07170D | IX   | BnaC02g07990D | GroupIII  | BnaA03g19180D |
| DREB_A-1 | BnaAnng36290D | VII | BnaCnng01910D | R2R3-MYB | BnaA02g09340D | IX   | BnaC01g40260D | GroupIII  | BnaC02g09670D |
| ERF_B-1  | BnaA09g46790D | VII | BnaA08g15400D | 1R-MYB   | BnaA02g20260D | IX   | BnaC05g47500D | GroupII-b | BnaAnng23990D |
| ERF_B-1  | BnaA05g38740D | VII | BnaC03g61840D | 1R-MYB   | BnaA03g00940D | IX   | BnaA05g37400D | GroupI    | BnaA05g31730D |
| DREB_A-5 | BnaC07g14220D | VII | BnaA01g01100D | 1R-MYB   | BnaC03g48630D | IX   | BnaAnng06380D | GroupII-c | BnaC03g60600D |
| DREB_A-4 | BnaC06g21120D | VII | BnaC01g02130D | R2R3-MYB | BnaCnng12230D | IX   | BnaC02g01470D | GroupIII  | BnaA09g24840D |
| ERF_B-5  | BnaC02g20580D | VII | BnaC04g44430D | R2R3-MYB | BnaC01g17440D | IX   | BnaA10g30260D | GroupI    | BnaC05g10200D |
| ERF_B-3  | BnaC03g17400D | VII | BnaC05g24270D | R2R3-MYB | BnaCnng68780D | IX   | BnaCnng66010D | GroupII-d | BnaCnng67520D |
| ERF_B-1  | BnaC01g36330D | VII | BnaA09g24610D | 3R-MYB   | BnaC03g04820D | IX   | BnaC07g49940D | GroupI    | BnaC03g67830D |
| DREB_A-4 | BnaA08g24660D | VII | BnaA03g56410D | R2R3-MYB | BnaC06g34360D | IX   | BnaAnng07000D | GroupI    | BnaA03g10980D |
| ERF_B-1  | BnaC02g30930D | VII | BnaA04g20520D | 1R-MYB   | BnaC04g44010D | IX   | BnaA09g02500D | GroupI    | BnaC02g34990D |
| ERF_B-3  | BnaC01g31050D | VII | BnaA05g08520D | R2R3-MYB | BnaA03g10750D | IX   | BnaCnng49350D | GroupI    | BnaA03g34110D |
| ERF      | BnaC09g46030D | VII | BnaC04g09600D | 1R-MYB   | BnaA03g40400D | IX   | BnaC07g25530D | GroupIII  | BnaA02g19570D |
| AP2      | BnaA02g16050D | VI  | BnaC03g76870D | R2R3-MYB | BnaA09g44500D | IX   | BnaA06g31080D | GroupIII  | BnaA02g19560D |
| AP2      | BnaA07g16350D | VI  | BnaC01g02720D | 1R-MYB   | BnaC08g26530D | IX   | BnaC04g31690D | GroupII-c | BnaC04g00310D |
| DREB_A-5 | BnaA03g53850D | VI  | BnaC09g09560D | 1R-MYB   | BnaA05g07470D | IX   | BnaA04g09470D | GroupII-c | BnaAnng24700D |
| DREB_A-5 | BnaC06g00880D | VI  | BnaA09g09300D | R2R3-MYB | BnaC09g50990D | IX   | BnaC06g12550D | GroupII-c | BnaA09g11810D |
| ERF_B-2  | BnaA01g29490D | V   | BnaC05g02200D | R2R3-MYB | BnaA09g44790D | IX   | BnaA07g14730D | GroupIII  | BnaC02g22950D |
| ERF_B-6  | BnaCnng59450D | V   | BnaA10g02300D | 1R-MYB   | BnaC02g16640D | VIII | BnaA05g18430D | GroupII-b | BnaA07g28340D |
| ERF_B-1  | BnaC08g40750D | V   | BnaCnng27030D | R2R3-MYB | BnaAnng05010D | VIII | BnaC05g28020D | GroupII-d | BnaA04g13570D |
| AP2      | BnaC05g27100D | V   | BnaA06g36330D | R2R3-MYB | BnaA03g37010D | VIII | BnaC06g08090D | GroupII-c | BnaA04g11210D |
| ERF_B-1  | BnaCnng69830D | V   | BnaA06g37000D | R2R3-MYB | BnaC03g61550D | VIII | BnaA09g23230D | GroupII-b | BnaC03g67380D |
| ERF_B-1  | BnaA06g02670D | V   | BnaC04g17630D | R2R3-MYB | BnaC06g42760D | VIII | BnaA05g18390D | GroupII-b | BnaA02g13630D |
| DREB_A-5 | BnaC08g21640D | V   | BnaC04g52290D | 1R-MYB   | BnaC08g10990D | VIII | BnaC05g28010D | GroupII-b | BnaA03g13370D |
| ERF_B-3  | BnaA09g50010D | V   | BnaA05g01970D | 1R-MYB   | BnaC07g34310D | VIII | BnaA08g06490D | GroupIII  | BnaC06g13990D |
| DREB_A-1 | BnaA08g30930D | V   | BnaC04g56840D | R2R3-MYB | BnaC09g54480D | VIII | BnaC08g07040D | GroupII-d | BnaC03g33830D |
| DREB_A-6 | BnaA09g12290D | V   | BnaA04g23690D | 1R-MYB   | BnaC04g54130D | VIII | BnaA07g10300D | GroupII-c | BnaC06g30480D |
| DREB_A-5 | BnaC09g07480D | V   | BnaC04g24820D | R2R3-MYB | BnaC05g20740D | VIII | BnaC07g13550D | GroupII-e | BnaC07g65200D |
| ERF_B-6  | BnaC08g12290D | V   | BnaA04g02780D | R2R3-MYB | BnaA03g16870D | VIII | BnaA07g13130D | GroupII-d | BnaC05g47140D |
| ERF_B-6  | BnaC02g09020D | V   | BnaA07g16990D | 1R-MYB   | BnaC06g02940D | VIII | BnaC04g16940D | GroupII-c | BnaA01g05500D |
| DREB_A-5 | BnaC05g18050D | V   | BnaCnng20400D | R2R3-MYB | BnaA03g44700D | VIII | BnaC01g23890D | GroupIII  | BnaC04g01210D |
| DREB_A-2 | BnaCnng07330D | V   | BnaA09g36130D | R2R3-MYB | BnaAnng17460D | VIII | BnaA01g33110D | GroupI    | BnaA03g48030D |
| ERF_B-3  | BnaCnng05070D | V   | BnaC08g27660D | R2R3-MYB | BnaA09g30490D | VIII | BnaA01g33090D | GroupII-c | BnaA07g07600D |
| ERF_B-3  | BnaA07g06760D | V   | BnaAnng07530D | 1R-MYB   | BnaA10g10930D | VIII | BnaC03g10790D | GroupI    | BnaC05g48590D |
| ERF      | BnaCnng73930D | V   | BnaA05g08020D | R2R3-MYB | BnaA01g33290D | VIII | BnaA03g08460D | GroupII-c | BnaC09g17450D |
| DREB_A-1 | BnaA10g07630D | V   | BnaC04g09030D | R2R3-MYB | BnaA01g02240D | VIII | BnaA10g14070D | GroupII-e | BnaA04g20400D |
| DREB_A-1 | BnaC08g41070D | V   | BnaC03g54810D | R2R3-MYB | BnaCnng06080D | VIII | BnaA02g05540D | GroupIII  | BnaC04g21660D |
| DREB_A-6 | BnaC02g24770D | V   | BnaCnng04010D | R2R3-MYB | BnaC05g45330D | VIII | BnaC02g09420D | GroupI    | BnaA03g51140D |
| DREB_A-6 | BnaA06g24080D | V   | BnaA10g28780D | R2R3-MYB | BnaA07g34700D | VIII | BnaC03g36600D | GroupII-d | BnaA03g51590D |
| DREB_A-2 | BnaCnng69090D | V   | BnaC06g00420D | R2R3-MYB | BnaA09g05480D | VIII | BnaA03g31260D | GroupI    | BnaA02g01720D |
| ERF_B-1  | BnaC06g10050D | V   | BnaC07g44670D | R2R3-MYB | BnaC04g17160D | VIII | BnaAnng34430D | GroupI    | BnaA08g14350D |
| ERF_B-3  | BnaC01g03990D | V   | BnaAnng26550D | R2R3-MYB | BnaA09g07190D | VIII | BnaA01g31660D | GroupI    | BnaC03g21360D |
| ERF_B-5  | BnaA03g48910D | V   | BnaC01g04330D | R2R3-MYB | BnaC02g22630D | VIII | BnaA01g31670D | GroupII-c | BnaC03g49470D |
| ERF_B-2  | BnaA03g34290D | V   | BnaC06g02640D | 1R-MYB   | BnaA05g01050D | VIII | BnaA01g31680D | GroupII-c | BnaA02g24470D |
| ERF_B-3  | BnaC09g27360D | V   | BnaA06g03040D | R2R3-MYB | BnaA05g30870D | VIII | BnaC03g36610D | GroupII-e | BnaA01g13230D |
| DREB_A-1 | BnaA03g13620D | V   | BnaCnng41320D | 1R-MYB   | BnaA03g43060D | VIII | BnaA03g31270D | GroupII-c | BnaCnng11190D |
| DREB_A-6 | BnaC09g11080D | V   | BnaA03g35190D | 1R-MYB   | BnaC01g02200D | VIII | BnaA05g28370D | GroupII-b | BnaCnng60780D |
| AP2      | BnaC05g31430D | V   | BnaA01g26200D | R2R3-MYB | BnaA02g36420D | VIII | BnaC05g42540D | GroupI    | BnaA06g33730D |
| ERF_B-4  | BnaC02g43290D | V   | BnaC01g43800D | R2R3-MYB | BnaC08g20580D | VIII | BnaA03g02680D | GroupII-d | BnaA04g14500D |
| ERF_B-1  | BnaA02g35090D | V   | BnaC05g33570D | R2R3-MYB | BnaC03g32460D | VIII | BnaA10g22600D | GroupII-c | BnaCnng13810D |
| AP2      | BnaA06g10760D | V   | BnaA05g20870D | R2R3-MYB | BnaA03g49030D | VIII | BnaC03g03780D | GroupIII  | BnaC04g47350D |
| AP2      | BnaC02g44180D | IV  | BnaA06g13700D | 1R-MYB   | BnaA01g10210D | VIII | BnaC09g47170D | GroupI    | BnaA03g48160D |
| DREB_A-5 | BnaC01g01700D | IV  | BnaC05g15020D | 1R-MYB   | BnaC06g33880D | VIII | BnaC02g00940D | GroupII-c | BnaA03g17120D |
| ERF      | BnaCnng71740D | III | BnaA01g27940D | 3R-MYB   | BnaC03g35980D | VIII | BnaA06g23210D | GroupII-c | BnaA03g17130D |
| DREB_A-2 | BnaA07g21680D | III | BnaA03g34610D | R2R3-MYB | BnaC07g36700D | VIII | BnaC03g50150D | GroupII-c | BnaC02g43320D |
| DREB_A-4 | BnaA07g33380D | III | BnaA05g22650D | 1R-MYB   | BnaCnng65380D | VIII | BnaC03g71220D | GroupII-d | BnaA04g13870D |
| ERF_B-1  | BnaAnng26790D | III | BnaA09g36010D | 1R-MYB   | BnaA05g23050D | VIII | BnaAnng17650D | GroupII-e | BnaAnng30430D |
| AP2      | BnaCnng39690D | III | BnaC05g35930D | R2R3-MYB | BnaAnng41910D | VIII | BnaC02g02740D | GroupII-c | BnaC03g69190D |
| ERF_B-3  | BnaA03g40380D | III | BnaCnng20200D | 1R-MYB   | BnaA03g30700D | VIII | BnaAnng34420D | GroupII-c | BnaC03g69160D |
| RAV      | BnaA09g28670D | III | BnaA02g00920D | R2R3-MYB | BnaA02g06100D | VIII | BnaA01g31650D | GroupIII  | BnaA01g13440D |
| DREB_A-2 | BnaAnng01320D | III | BnaC09g45380D | 1R-MYB   | BnaC02g38100D | VIII | BnaA03g01250D | GroupI    | BnaCnng64000D |
| ERF_B-6  | BnaC09g37870D | III | BnaA10g21200D | 1R-MYB   | BnaC03g25810D | VIII | BnaC09g50530D | GroupII-c | BnaA06g16820D |
| DREB_A-4 | BnaC04g38070D | III | BnaA01g31420D | R2R3-MYB | BnaCnng43220D | VIII | BnaA10g25760D | GroupII-c | BnaC04g05170D |
| ERF_B-3  | BnaA09g16520D | III | BnaA09g24670D | 1R-MYB   | BnaC03g13270D | VII  | BnaA01g34470D | GroupII-c | BnaA04g12540D |
| DREB_A-5 | BnaA09g07540D | III | BnaCnng38290D | 1R-MYB   | BnaC03g26090D | VII  | BnaCnng18420D | GroupI    | BnaC08g40010D |
| DREB_A-6 | BnaC06g20590D | III | BnaA04g02670D | R2R3-MYB | BnaC06g14460D | VII  | BnaA05g32430D | GroupII-e | BnaA09g00120D |

|          |               |     |               |          |               |     |               |           |               |
|----------|---------------|-----|---------------|----------|---------------|-----|---------------|-----------|---------------|
| ERF_B-3  | BnaC03g66140D | III | BnaC04g52230D | R2R3-MYB | BnaA08g22480D | VII | BnaCnng06310D | GroupII-c | BnaC07g27590D |
| ERF_B-2  | BnaCnng27470D | III | BnaC04g56770D | 1R-MYB   | BnaC02g10950D | VII | BnaC09g40700D | GroupII-d | BnaC07g27510D |
| RAV      | BnaA08g19490D | III | BnaA04g23630D | 1R-MYB   | BnaC03g7720D  | VII | BnaA03g06460D | GroupII-e | BnaA09g55250D |
| ERF_B-1  | BnaC05g21820D | III | BnaC03g23710D | R2R3-MYB | BnaC03g37840D | VII | BnaC03g08290D | GroupI    | BnaC09g53550D |
| ERF_B-1  | BnaA03g33790D | III | BnaA03g19810D | R2R3-MYB | BnaC08g06060D | VII | BnaC05g35830D | GroupI    | BnaCnng66020D |
| ERF      | BnaA10g21750D | III | BnaC04g52770D | 3R-MYB   | BnaA04g09530D | VII | BnaA05g22540D | GroupII-b | BnaA09g20470D |
| DREB_A-2 | BnaAnng13220D | III | BnaA05g02840D | R2R3-MYB | BnaCnng43450D | VII | BnaCnng36980D | GroupI    | BnaC03g44980D |
| DREB_A-4 | BnaA02g11090D | III | BnaC03g10840D | R2R3-MYB | BnaA06g21900D | VII | BnaA02g12310D | GroupII-b | BnaAnng32610D |
| ERF_B-1  | BnaC05g09160D | III | BnaC06g16270D | R2R3-MYB | BnaA06g12870D | VII | BnaCnng72050D | GroupII-c | BnaA02g14710D |
| ERF_B-6  | BnaA07g24590D | III | BnaA09g37270D | R2R3-MYB | BnaC02g05990D | VII | BnaA07g17790D | GroupII-d | BnaAnng10540D |
| ERF_B-1  | BnaC03g06100D | III | BnaC08g29000D | 3R-MYB   | BnaC09g45060D | VII | BnaC03g71120D | GroupII-e | BnaA09g54800D |
| ERF_B-1  | BnaA07g36710D | III | BnaC09g48330D | R2R3-MYB | BnaC06g39570D | VII | BnaA08g00010D | GroupIII  | BnaA07g16850D |
| ERF_B-2  | BnaC06g33570D | III | BnaA10g23610D | R2R3-MYB | BnaCnng24780D | VII | BnaA06g21090D | GroupII-b | BnaA07g20110D |
| ERF_B-3  | BnaC07g31340D | III | BnaAnng36910D | 3R-MYB   | BnaA10g27190D | VII | BnaC03g52400D | GroupI    | BnaC07g42990D |
| DREB_A-4 | BnaA02g15420D | III | BnaC04g33650D | 1R-MYB   | BnaC02g12480D | VII | BnaC08g21160D | GroupII-d | BnaC07g43320D |
| DREB_A-4 | BnaA09g23540D | III | BnaA04g12040D | R2R3-MYB | BnaA02g35490D | VII | BnaA06g15870D | GroupII-b | BnaC07g43490D |
| RAV      | BnaA06g07470D | III | BnaA04g12030D | 1R-MYB   | BnaC01g33300D | VII | BnaA09g04810D | GroupII-c | BnaC07g47230D |
| DREB_A-5 | BnaC07g16160D | III | BnaC04g33660D | R2R3-MYB | BnaC04g32490D | VII | BnaC09g04330D | GroupII-c | BnaC03g24960D |
| DREB_A-1 | BnaC09g26990D | III | BnaAnng33910D | R2R3-MYB | BnaC09g05300D | VII | BnaC07g29890D | GroupII-e | BnaC07g52800D |
| DREB_A-4 | BnaA02g01080D | III | BnaC08g35920D | R2R3-MYB | BnaA03g05370D | VII | BnaA06g27060D | GroupII-c | BnaA07g27840D |
| ERF_B-1  | BnaA09g46720D | III | BnaAnng39310D | 1R-MYB   | BnaA06g15430D | VII | BnaA05g17900D | GroupII-b | BnaA07g26870D |
| ERF_B-6  | BnaC06g30140D | III | BnaC05g51490D | R2R3-MYB | BnaC08g18090D | VII | BnaCnng49700D | GroupII-e | BnaC02g14940D |
| DREB_A-4 | BnaC03g66900D | III | BnaA08g04710D | R2R3-MYB | BnaA02g16430D | VII | BnaCnng38230D | GroupII-b | BnaA09g23500D |
| ERF_B-6  | BnaA03g07750D | III | BnaC08g05560D | 1R-MYB   | BnaC09g10430D | VII | BnaA10g21230D | GroupI    | BnaA08g24160D |
| ERF_B-6  | BnaA06g27670D | III | BnaA04g12020D | 1R-MYB   | BnaC07g18400D | VII | BnaCnng20180D | GroupII-c | BnaC09g44020D |
| DREB_A-6 | BnaA02g34570D | III | BnaC04g33670D | R2R3-MYB | BnaAnng03830D | VII | BnaA02g00900D | GroupI    | BnaC08g12240D |
| ERF_B-3  | BnaA01g23970D | III | BnaA09g43320D | 1R-MYB   | BnaA07g36950D | VII | BnaA02g36760D | GroupII-d | BnaC04g41330D |
| ERF_B-3  | BnaC04g01080D | III | BnaC08g35930D | 1R-MYB   | BnaC06g02930D | VII | BnaC02g32460D | GroupI    | BnaC04g41050D |
| DREB_A-4 | BnaC06g17770D | III | BnaA06g37290D | 1R-MYB   | BnaC08g18470D | VII | BnaA06g40380D | GroupII-b | BnaC04g40940D |
| ERF_B-6  | BnaA06g27540D | III | BnaC07g47540D | 1R-MYB   | BnaA02g32790D | VII | BnaC07g19280D | GroupI    | BnaA06g08890D |
| ERF_B-6  | BnaA08g04400D | III | BnaC03g60240D | R2R3-MYB | BnaA01g13590D | VII | BnaC07g34980D | GroupII-c | BnaC07g09430D |
| ERF      | BnaA05g20050D | III | BnaA08g16860D | 3R-MYB   | BnaA10g20990D | VII | BnaA03g43500D | GroupII-e | BnaC07g08810D |
| ERF_B-3  | BnaC07g08350D | III | BnaA04g23410D | R2R3-MYB | BnaC01g01250D | VII | BnaC01g10510D | GroupII-c | BnaC01g10570D |
| RAV      | BnaA05g15710D | III | BnaC04g47290D | R2R3-MYB | BnaC01g20650D | VII | BnaA01g08830D | GroupII-e | BnaC05g22280D |
| DREB_A-4 | BnaC05g37110D | III | BnaC04g01480D | 1R-MYB   | BnaC02g10960D | VII | BnaC08g07470D | GroupII-c | BnaC05g22100D |
| ERF_B-1  | BnaA08g01300D | III | BnaA05g01800D | 1R-MYB   | BnaC05g05090D | VII | BnaA08g30060D | GroupII-e | BnaC04g23420D |
| ERF      | BnaAnng40110D | III | BnaC03g22760D | 3R-MYB   | BnaA08g12050D | VII | BnaA08g29850D | GroupII-d | BnaA03g28720D |
| ERF_B-3  | BnaC09g20100D | III | BnaA03g19140D | R2R3-MYB | BnaC02g46060D | VI  | BnaC04g52880D | GroupI    | BnaA03g27660D |
| ERF_B-6  | BnaA01g4290D  | III | BnaC08g44990D | R2R3-MYB | BnaA06g34910D | VI  | BnaA05g34370D | GroupII-c | BnaC02g31540D |
| DREB_A-4 | BnaC04g03870D | III | BnaA09g49720D | R2R3-MYB | BnaA04g00800D | VI  | BnaC03g23960D | GroupII-b | BnaC06g29310D |
| DREB_A-4 | BnaC08g07150D | III | BnaA08g28740D | R2R3-MYB | BnaC01g41180D | VI  | BnaA04g24740D | GroupII-e | BnaC02g27650D |
| ERF_B-6  | BnaAnng20260D | III | BnaC08g01910D | R2R3-MYB | BnaA03g22590D | VI  | BnaC04g48620D | GroupII-c | BnaC04g14500D |
| ERF_B-4  | BnaA03g04290D | III | BnaA08g28440D | R2R3-MYB | BnaA06g30710D | VI  | BnaA03g19960D | GroupI    | BnaC07g22240D |
| ERF_B-6  | BnaC07g40560D | III | BnaC08g01660D | 1R-MYB   | BnaA10g25530D | VI  | BnaC01g38180D | GroupII-c | BnaC09g19320D |
| DREB_A-6 | BnaA01g05760D | III | BnaC05g04130D | R2R3-MYB | BnaC02g37590D | VI  | BnaA01g30220D | GroupII-d | BnaC01g16120D |
| AP2      | BnaA05g15470D | III | BnaA10g04020D | 1R-MYB   | BnaA05g03970D | VI  | BnaA03g32520D | GroupIII  | BnaC01g15640D |
| ERF      | BnaA06g24400D | III | BnaA04g18340D | R2R3-MYB | BnaC01g37570D | VI  | BnaCnng44060D | GroupI    | BnaA05g07220D |
| ERF_B-3  | BnaC01g10080D | III | BnaC04g42420D | 1R-MYB   | BnaC02g37370D | VI  | BnaC05g40430D | GroupII-c | BnaC06g25390D |
| ERF_B-3  | BnaC04g42060D | III | BnaCnng30720D | 1R-MYB   | BnaC05g47520D | VI  | BnaA05g26290D | GroupIII  | BnaAnng00020D |
| DREB_A-2 | BnaC08g28620D | III | BnaA05g11370D | R2R3-MYB | BnaC08g17650D | VI  | BnaA07g14780D | GroupI    | BnaAnng01980D |
| ERF_B-6  | BnaA04g14830D | II  | BnaC09g48720D | R2R3-MYB | BnaA06g15610D | VI  | BnaC06g12700D | GroupII-c | BnaC02g31540D |
| DREB_A-4 | BnaC09g12830D | II  | BnaA10g24100D | R2R3-MYB | BnaC09g03530D | VI  | BnaCnng46350D | GroupII-d | BnaC02g39360D |
| ERF_B-1  | BnaC02g22960D | II  | BnaCnng67350D | R2R3-MYB | BnaA06g21780D | VI  | BnaA08g19970D | GroupII-c | BnaC02g39170D |
| AP2      | BnaC02g00280D | II  | BnaAnng36310D | 1R-MYB   | BnaCnng67570D | VI  | BnaA07g28210D | GroupII-b | BnaA01g05060D |
| DREB_A-4 | BnaA09g04470D | II  | BnaUnng03970D | R2R3-MYB | BnaCnng63050D | VI  | BnaC06g27950D | GroupIII  | BnaA04g23480D |
| ERF_B-3  | BnaA09g39350D | II  | BnaAnng33510D | 1R-MYB   | BnaA05g28230D | VI  | BnaC04g43920D | GroupIII  | BnaA04g23470D |
| DREB_A-4 | BnaAnng34830D | II  | BnaC08g43230D | R2R3-MYB | BnaC03g71860D | VI  | BnaA04g19530D | GroupII-b | BnaCnng01360D |
| DREB_A-5 | BnaA08g12710D | II  | BnaA09g48940D | R2R3-MYB | BnaCnng29120D | VI  | BnaA05g10110D | GroupII-e | BnaCnng02000D |
| ERF_B-1  | BnaC03g09100D | II  | BnaC05g06030D | 1R-MYB   | BnaC02g02590D | VI  | BnaC04g11040D | GroupII-c | BnaA07g24310D |
| RAV      | BnaCnng04580D | II  | BnaA06g04770D | R2R3-MYB | BnaC03g26620D | VI  | BnaC04g11030D | GroupI    | BnaA03g17820D |
| ERF      | BnaA08g04940D | II  | BnaA05g26790D | 1R-MYB   | BnaCnng78680D | VI  | BnaA10g05960D | GroupII-c | BnaA05g13660D |
| ERF      | BnaA03g22100D | II  | BnaCnng22950D | R2R3-MYB | BnaA06g11110D | VI  | BnaC09g26970D | GroupIII  | BnaA04g02550D |
| DREB_A-6 | BnaA09g30810D | II  | BnaA01g30760D | R2R3-MYB | BnaA02g29490D | VI  | BnaC03g71470D | GroupIII  | BnaA04g02560D |
| DREB_A-4 | BnaA07g18690D | II  | BnaC03g37460D | R2R3-MYB | BnaC06g29460D | VI  | BnaA03g04240D | GroupII-e | BnaA08g10660D |
| ERF      | BnaC08g25840D | II  | BnaA03g32170D | 1R-MYB   | BnaA06g05130D | VI  | BnaC09g43890D | GroupII-c | BnaA08g08590D |
| ERF_B-1  | BnaA01g28970D | II  | BnaC05g40810D | R2R3-MYB | BnaA05g00510D | VI  | BnaA02g01460D | GroupII-c | BnaC08g32160D |
| ERF_B-3  | BnaA07g06750D | II  | BnaC09g48640D | 1R-MYB   | BnaC07g35020D | VI  | BnaA10g20110D | GroupII-c | BnaC08g35490D |
| DREB_A-6 | BnaC08g36140D | II  | BnaA10g24020D | 1R-MYB   | BnaA05g19710D | VI  | BnaC02g04540D | GroupII-c | BnaC04g38910D |
| DREB_A-2 | BnaA10g16490D | II  | BnaC02g01780D | R2R3-MYB | BnaC09g32700D | VI  | BnaC01g40250D | GroupII-e | BnaA07g07190D |
| ERF_B-6  | BnaA06g10040D | II  | BnaAnng01920D | R2R3-MYB | BnaA06g24760D | VI  | BnaA05g37410D | GroupII-c | BnaC07g19090D |
| DREB_A-2 | BnaC04g47060D | II  | BnaC06g30310D | R2R3-MYB | BnaC07g4080D  | VI  | BnaC05g47490D | GroupII-c | BnaA03g04160D |
| ERF_B-1  | BnaCnng04890D | II  | BnaA07g27320D | R2R3-MYB | BnaC09g05650D | VI  | BnaA09g06870D | GroupII-b | BnaA03g05230D |
| DREB_A-4 | BnaC08g30700D | II  | BnaA09g30910D | 1R-MYB   | BnaAnng28150D | VI  | BnaC09g06370D | GroupII-d | BnaC01g06900D |
| ERF_B-3  | BnaC03g25680D | II  | BnaC05g17700D | R2R3-MYB | BnaC05g40480D | VI  | BnaC02g43170D | GroupII-b | BnaC01g06660D |
| DREB_A-1 | BnaCnng49280D | II  | BnaC08g20170D | R2R3-MYB | BnaC02g06730D | VI  | BnaA02g34250D | GroupII-c | BnaA01g08990D |
| DREB_A-6 | BnaAnng29660D | II  | BnaA08g20970D | R2R3-MYB | BnaA07g11930D | VI  | BnaA06g23510D | GroupII-b | BnaC06g19560D |
| DREB_A-1 | BnaA09g47030D | II  | BnaA07g20770D | R2R3-MYB | BnaA04g13540D | VI  | BnaCnng30500D | GroupII-c | BnaC03g20650D |

|          |               |    |               |          |               |    |               |           |               |
|----------|---------------|----|---------------|----------|---------------|----|---------------|-----------|---------------|
| DREB_A-4 | BnaA10g00620D | II | BnaC06g20630D | 1R-MYB   | BnaC01g21010D | VI | BnaA06g01770D | GroupIII  | BnaA05g01840D |
| DREB_A-6 | BnaC03g49170D | II | BnaA07g33790D | R2R3-MYB | BnaA06g37380D | VI | BnaCnng64100D | GroupIII  | BnaA05g01410D |
| DREB_A-1 | BnaC03g71900D | II | BnaC06g38430D | 1R-MYB   | BnaA06g26310D | VI | BnaA01g28710D | GroupII-c | BnaA05g00620D |
| ERF      | BnaC04g02040D | II | BnaC02g00560D | 1R-MYB   | BnaCnng23360D | VI | BnaCnng30350D | GroupIII  | BnaC07g30300D |
| ERF_B-2  | BnaC01g35070D | II | BnaA02g00310D | R2R3-MYB | BnaA09g11780D | VI | BnaC08g43050D | GroupII-c | BnaC09g06700D |
| AP2      | BnaC01g01710D | II | BnaC09g46670D | 1R-MYB   | BnaA02g25380D | VI | BnaA03g33910D | GroupII-b | BnaC02g17970D |
| ERF_B-4  | BnaA03g02000D | II | BnaA10g22150D | R2R3-MYB | BnaA09g46360D | VI | BnaA05g24040D | GroupII-c | BnaA10g18970D |
| ERF_B-3  | BnaA08g11220D | II | BnaC02g43620D | 1R-MYB   | BnaC06g12130D | VI | BnaC05g38130D | GroupII-b | BnaA10g18980D |
| ERF_B-4  | BnaC04g44080D | II | BnaAnng04720D | R2R3-MYB | BnaCnng13680D | VI | BnaCnng10130D | GroupII-c | BnaA10g20210D |
| ERF      | BnaA02g00560D | II | BnaC09g06840D | R2R3-MYB | BnaC09g13310D | VI | BnaA09g13880D | GroupII-b | BnaC08g37010D |
| ERF_B-5  | BnaC02g14430D | II | BnaA06g24140D | 1R-MYB   | BnaA02g28360D | VI | BnaC06g30680D | GroupII-b | BnaC01g13500D |
| ERF_B-6  | BnaCnng47540D | II | BnaC03g49070D | 1R-MYB   | BnaCnng23500D | VI | BnaA07g28000D | GroupIII  | BnaA03g21390D |
| DREB_A-4 | BnaC09g28200D | I  | BnaA08g04620D | R2R3-MYB | BnaA09g03290D | VI | BnaC06g43410D | GroupII-c | BnaA03g20910D |
| ERF_B-1  | BnaA09g27300D | I  | BnaC03g59330D | R2R3-MYB | BnaC07g10840D | VI | BnaA07g24270D | GroupII-b | BnaC08g18410D |
| ERF_B-4  | BnaCnng05370D | I  | BnaA04g05810D | R2R3-MYB | BnaA03g02170D | VI | BnaA05g24050D | GroupII-c | BnaA05g05760D |
| ERF_B-4  | BnaC03g49530D | I  | BnaCnng36700D | R2R3-MYB | BnaC09g47470D | VI | BnaC05g38150D | GroupII-b | BnaC03g06770D |
| ERF_B-6  | BnaA07g27210D | I  | BnaC09g09130D | 1R-MYB   | BnaA06g11740D | VI | BnaA01g28930D | GroupII-d | BnaA03g14060D |
| ERF_B-1  | BnaA05g14650D | I  | BnaA09g08870D | R2R3-MYB | BnaCnng32030D | VI | BnaC03g39160D | GroupI    | BnaA03g13820D |
| ERF_B-6  | BnaC06g20650D | I  | BnaA03g39300D | R2R3-MYB | BnaC03g26060D | VI | BnaA03g3890D  | GroupII-b | BnaA03g20030D |
| DREB_A-4 | BnaA04g15130D | I  | BnaC03g46620D | 1R-MYB   | BnaCnng22510D | VI | BnaC01g36040D | GroupII-c | BnaC07g27240D |
| ERF_B-2  | BnaA07g30130D | I  | BnaAnng11690D | R2R3-MYB | BnaC02g22160D | VI | BnaC06g05930D | GroupII-d | BnaA06g29220D |
| ERF_B-1  | BnaA02g22560D | I  | BnaC01g03460D | R2R3-MYB | BnaC03g17390D | VI | BnaC06g05920D | GroupII-b | BnaA09g21040D |
| ERF_B-3  | BnaCnng60520D | I  | BnaC03g65600D | R2R3-MYB | BnaA01g00670D | VI | BnaA03g48570D | GroupII-c | BnaA09g03790D |
| DREB_A-4 | BnaC06g37920D | I  | BnaA08g10920D | R2R3-MYB | BnaA02g02300D | VI | BnaC07g40860D | GroupIII  | BnaC09g04560D |
| ERF      | BnaA01g34730D |    |               | 1R-MYB   | BnaC07g31380D | VI | BnaA01g16400D | GroupII-b | BnaA07g35260D |
| ERF_B-6  | BnaC09g04110D |    |               | 1R-MYB   | BnaA05g29060D | VI | BnaC01g19550D | GroupII-c | BnaC02g32270D |
| ERF_B-3  | BnaC07g20090D |    |               | R2R3-MYB | BnaA06g31880D | VI | BnaA02g18390D | GroupIII  | BnaA04g06860D |
| DREB_A-5 | BnaC07g13470D |    |               | 1R-MYB   | BnaA09g32720D | VI | BnaCnng09850D | GroupII-c | BnaA06g28100D |
| ERF_B-3  | BnaA09g05710D |    |               | R2R3-MYB | BnaC02g07480D | VI | BnaC08g07270D | GroupII-b | BnaC06g40170D |
| DREB_A-4 | BnaC06g32560D |    |               | R2R3-MYB | BnaA05g06600D | VI | BnaC05g00370D | GroupII-e | BnaA04g01860D |
| DREB_A-6 | BnaA06g24070D |    |               | 1R-MYB   | BnaA05g32140D | VI | BnaA10g00280D | GroupIII  | BnaA04g00590D |
| AP2      | BnaC03g31040D |    |               | R2R3-MYB | BnaC08g48600D | VI | BnaAnng05950D | GroupI    | BnaA01g15760D |
| ERF_B-3  | BnaA10g04090D |    |               | R2R3-MYB | BnaA03g40690D | VI | BnaC02g00990D | GroupI    | BnaA01g15570D |
| ERF_B-5  | BnaC08g06130D |    |               | 1R-MYB   | BnaA08g15280D | VI | BnaA03g02640D | GroupII-d | BnaC04g35770D |
| DREB_A-5 | BnaC06g22710D |    |               | R2R3-MYB | BnaC01g38230D | VI | BnaC03g03740D | GroupII-e | BnaA08g18040D |
| RAV      | BnaC05g51390D |    |               | R2R3-MYB | BnaC02g39010D | VI | BnaC09g47250D | GroupII-c | BnaA03g43640D |
| ERF_B-3  | BnaC01g40920D |    |               | R2R3-MYB | BnaA04g21820D | VI | BnaA06g22900D | GroupII-b | BnaA03g25430D |
| DREB_A-5 | BnaA09g44290D |    |               | R2R3-MYB | BnaC07g47650D | VI | BnaC03g50570D | GroupI    | BnaC04g08020D |
| RAV      | BnaC03g77730D |    |               | R2R3-MYB | BnaA10g18810D | VI | BnaA10g22680D | GroupI    | BnaA04g06800D |
| DREB_A-5 | BnaC08g20020D |    |               | R2R3-MYB | BnaA07g24240D | VI | BnaA02g33910D | GroupI    | BnaC03g32670D |
| ERF_B-5  | BnaA07g23650D |    |               | 1R-MYB   | BnaA03g43540D | VI | BnaC02g42720D | GroupII-d | BnaC07g38840D |
| ERF_B-1  | BnaC03g58550D |    |               | R2R3-MYB | BnaA07g26980D | V  | BnaA07g03200D | GroupI    | BnaC07g40660D |
| ERF_B-3  | BnaA07g38140D |    |               | R2R3-MYB | BnaA09g02470D | V  | BnaC07g06080D | GroupI    | BnaA03g37950D |
| DREB_A-4 | BnaC02g03940D |    |               | R2R3-MYB | BnaA06g18160D | V  | BnaC03g60970D | GroupII-e | BnaC08g29410D |
| ERF_B-3  | BnaC07g45030D |    |               | R2R3-MYB | BnaA08g09740D | V  | BnaA03g39450D | GroupIII  | BnaC08g27340D |
| ERF_B-3  | BnaC07g08360D |    |               | 1R-MYB   | BnaA10g16590D | V  | BnaC09g09210D | GroupII-e | BnaC07g38350D |
| ERF_B-2  | BnaC04g51210D |    |               | 1R-MYB   | BnaA03g30200D | V  | BnaA09g08950D | GroupIII  | BnaC07g38550D |
| ERF_B-6  | BnaA10g15390D |    |               | R2R3-MYB | BnaC05g51000D | V  | BnaA09g08940D | GroupI    | BnaC01g18810D |
| ERF_B-1  | BnaC05g02080D |    |               | 1R-MYB   | BnaC06g25000D | V  | BnaA02g26420D | GroupI    | BnaC01g18490D |
| ERF_B-4  | BnaA05g09970D |    |               | 1R-MYB   | BnaC01g01940D | V  | BnaC02g34540D | GroupII-b | BnaC09g22830D |
| ERF_B-2  | BnaC06g24360D |    |               | R2R3-MYB | BnaC03g15450D | V  | BnaC09g21000D |           |               |
| DREB_A-4 | BnaC01g05620D |    |               | 1R-MYB   | BnaCnng62330D | V  | BnaA09g19070D |           |               |
| DREB_A-4 | BnaC06g07710D |    |               | R2R3-MYB | BnaC08g31190D | V  | BnaA06g34140D |           |               |
| DREB_A-4 | BnaC03g25050D |    |               | R2R3-MYB | BnaCnng31260D | V  | BnaC07g21770D |           |               |
| DREB_A-1 | BnaC08g15650D |    |               | R2R3-MYB | BnaC07g31640D | V  | BnaC03g54890D |           |               |
| DREB_A-5 | BnaC05g17200D |    |               | 1R-MYB   | BnaA01g32200D | V  | BnaA06g39010D |           |               |
| ERF_B-1  | BnaA02g19610D |    |               | R2R3-MYB | BnaC01g31020D | V  | BnaC03g53950D |           |               |
| ERF_B-6  | BnaC04g37670D |    |               | R2R3-MYB | BnaA03g39240D | V  | BnaA06g19740D |           |               |
| DREB_A-2 | BnaC03g09040D |    |               | R2R3-MYB | BnaC06g19980D | V  | BnaA02g05600D |           |               |
| DREB_A-2 | BnaA04g02310D |    |               | 1R-MYB   | BnaA10g29180D | V  | BnaA10g13930D |           |               |
| ERF_B-3  | BnaC09g17590D |    |               | 1R-MYB   | BnaC09g33360D | V  | BnaCnng60710D |           |               |
| DREB_A-2 | BnaA05g27930D |    |               | R2R3-MYB | BnaC08g18260D | V  | BnaA03g08510D |           |               |
| ERF_B-1  | BnaC06g41440D |    |               | 1R-MYB   | BnaA03g31720D | IV | BnaA02g20430D |           |               |
| ERF_B-5  | BnaC07g38490D |    |               | R2R3-MYB | BnaA05g34070D | IV | BnaC02g27990D |           |               |
| DREB_A-3 | BnaCnng27900D |    |               | R2R3-MYB | BnaA01g31080D | IV | BnaA09g51610D |           |               |
| DREB_A-2 | BnaAnng09170D |    |               | R2R3-MYB | BnaA05g29680D | IV | BnaCnng01500D |           |               |
| DREB_A-5 | BnaA09g30360D |    |               | R2R3-MYB | BnaCnng17820D | IV | BnaA09g51620D |           |               |
| ERF_B-3  | BnaC08g44670D |    |               | R2R3-MYB | BnaA09g02150D | IV | BnaCnng01510D |           |               |
| DREB_A-1 | BnaA08g30950D |    |               | R2R3-MYB | BnaA06g05440D | IV | BnaA09g51630D |           |               |
| ERF_B-6  | BnaA09g04650D |    |               | R2R3-MYB | BnaC02g05740D | IV | BnaCnng01530D |           |               |
| ERF_B-1  | BnaA07g08450D |    |               | 1R-MYB   | BnaC09g34140D | IV | BnaC05g00890D |           |               |
| ERF_B-6  | BnaA02g32120D |    |               | R2R3-MYB | BnaAnng27960D | IV | BnaC05g00930D |           |               |
| DREB_A-3 | BnaA03g18970D |    |               | 1R-MYB   | BnaC05g46800D | IV | BnaA09g19800D |           |               |
| DREB_A-6 | BnaA07g20720D |    |               | 1R-MYB   | BnaC03g15160D | IV | BnaC01g28650D |           |               |
| RAV      | BnaA02g14040D |    |               | 1R-MYB   | BnaC06g36010D | IV | BnaC05g00910D |           |               |
| AP2      | BnaC07g16190D |    |               | R2R3-MYB | BnaC04g32560D | IV | BnaC05g00940D |           |               |
| DREB_A-1 | BnaUnng01150D |    |               | 1R-MYB   | BnaC05g50190D | IV | BnaA10g00830D |           |               |

|          |               |  |  |          |               |     |               |  |  |
|----------|---------------|--|--|----------|---------------|-----|---------------|--|--|
| ERF_B-1  | BnaA08g18580D |  |  | 1R-MYB   | BnaC05g14070D | IV  | BnaC05g00960D |  |  |
| DREB_A-2 | BnaA10g25000D |  |  | 1R-MYB   | BnaA09g38510D | IV  | BnaA10g00860D |  |  |
| ERF_B-3  | BnaA02g25110D |  |  | R2R3-MYB | BnaA01g29790D | IV  | BnaC06g15990D |  |  |
| DREB_A-2 | BnaC05g42130D |  |  | 1R-MYB   | BnaC07g00540D | IV  | BnaC01g24910D |  |  |
| DREB_A-6 | BnaAnng37390D |  |  | R2R3-MYB | BnaA10g04120D | IV  | BnaA09g35990D |  |  |
| ERF_B-4  | BnaA04g19700D |  |  | 1R-MYB   | BnaC09g33810D | IV  | BnaC06g13440D |  |  |
| DREB_A-4 | BnaA09g38530D |  |  | R2R3-MYB | BnaC03g04220D | IV  | BnaA07g15270D |  |  |
| ERF_B-1  | BnaC06g03860D |  |  | 1R-MYB   | BnaA07g38930D | IV  | BnaC04g33200D |  |  |
| DREB_A-6 | BnaC05g27390D |  |  | 1R-MYB   | BnaA06g11070D | IV  | BnaA04g10830D |  |  |
| DREB_A-2 | BnaC09g49920D |  |  | 1R-MYB   | BnaA08g22300D | IV  | BnaC08g18550D |  |  |
| DREB_A-6 | BnaA02g18720D |  |  | 1R-MYB   | BnaC07g32760D | IV  | BnaA03g04640D |  |  |
| ERF      | BnaA10g12950D |  |  | R2R3-MYB | BnaC09g44160D | IV  | BnaC03g06170D |  |  |
| ERF_B-3  | BnaC06g42850D |  |  | R2R3-MYB | BnaCnng01390D | IV  | BnaC09g43200D |  |  |
| DREB_A-4 | BnaC03g20180D |  |  | R2R3-MYB | BnaA10g19100D | IV  | BnaA10g19630D |  |  |
| ERF_B-6  | BnaC04g37680D |  |  | 1R-MYB   | BnaA02g31210D | IV  | BnaC03g58370D |  |  |
| AP2      | BnaC04g15640D |  |  | R2R3-MYB | BnaA06g28210D | IV  | BnaA08g18520D |  |  |
| DREB_A-2 | BnaA03g31510D |  |  | 1R-MYB   | BnaA10g17370D | IV  | BnaC08g49760D |  |  |
| ERF_B-3  | BnaA10g05780D |  |  | 1R-MYB   | BnaC03g08310D | IV  | BnaA09g51470D |  |  |
| ERF_B-3  | BnaA10g30200D |  |  | R2R3-MYB | BnaC02g01090D | IV  | BnaA09g51460D |  |  |
| AP2      | BnaA01g36720D |  |  | 1R-MYB   | BnaA04g19630D | IV  | BnaC05g00990D |  |  |
| ERF_B-5  | BnaC01g15610D |  |  | R2R3-MYB | BnaA07g31220D | IV  | BnaA10g00880D |  |  |
| DREB_A-6 | BnaC07g46940D |  |  | 1R-MYB   | BnaCnng41840D | IV  | BnaC08g49770D |  |  |
| DREB_A-3 | BnaC03g72510D |  |  | R2R3-MYB | BnaC07g45320D | IV  | BnaC05g01020D |  |  |
| DREB_A-2 | BnaC02g24390D |  |  | R2R3-MYB | BnaC06g35340D | IV  | BnaA10g00910D |  |  |
| DREB_A-4 | BnaA10g07620D |  |  | 1R-MYB   | BnaC03g76670D | IV  | BnaA10g00870D |  |  |
| DREB_A-6 | BnaA07g33930D |  |  | R2R3-MYB | BnaA06g24160D | IV  | BnaC05g00970D |  |  |
| ERF_B-6  | BnaA02g27680D |  |  | R2R3-MYB | BnaC07g13600D | IV  | BnaC05g01030D |  |  |
| ERF_B-3  | BnaA05g01500D |  |  | 1R-MYB   | BnaC03g39750D | IV  | BnaC05g01000D |  |  |
| DREB_A-4 | BnaA09g12950D |  |  | 3R-MYB   | BnaC07g43900D | IV  | BnaA10g00890D |  |  |
| ERF_B-3  | BnaAnng06940D |  |  | R2R3-MYB | BnaC09g41280D | IV  | BnaC05g01040D |  |  |
| DREB_A-1 | BnaA09g10730D |  |  | R2R3-MYB | BnaA04g28770D | IV  | BnaA10g00920D |  |  |
| ERF_B-3  | BnaA01g34910D |  |  | R2R3-MYB | BnaC05g40470D | III | BnaA07g05000D |  |  |
| RAV      | BnaA06g02510D |  |  | 1R-MYB   | BnaA01g02690D | III | BnaA03g19110D |  |  |
| DREB_A-2 | BnaA02g17250D |  |  | R2R3-MYB | BnaA05g27740D | III | BnaA09g28720D |  |  |
| DREB_A-6 | BnaC08g12880D |  |  | 1R-MYB   | BnaA07g22980D | III | BnaC05g20530D |  |  |
| DREB_A-6 | BnaC04g55700D |  |  | 1R-MYB   | BnaA08g21210D | III | BnaC07g11950D |  |  |
| ERF_B-6  | BnaC07g29370D |  |  | 1R-MYB   | BnaA05g00340D | III | BnaA07g37110D |  |  |
| DREB_A-4 | BnaC05g00680D |  |  | R2R3-MYB | BnaA09g28450D | III | BnaA03g04920D |  |  |
| ERF_B-1  | BnaC03g69420D |  |  | 1R-MYB   | BnaC09g29440D | III | BnaA03g27400D |  |  |
| AP2      | BnaC02g11520D |  |  | R2R3-MYB | BnaC03g01730D | III | BnaC03g32420D |  |  |
| DREB_A-4 | BnaA03g42840D |  |  | R2R3-MYB | BnaC03g07960D | III | BnaA07g16830D |  |  |
| ERF      | BnaA03g02990D |  |  | 1R-MYB   | BnaAnng17890D | III | BnaA03g49460D |  |  |
| ERF_B-2  | BnaA03g33290D |  |  | R2R3-MYB | BnaA05g10900D | III | BnaC07g41850D |  |  |
| RAV      | BnaA06g33420D |  |  | 1R-MYB   | BnaC03g00040D | III | BnaC01g09270D |  |  |
| ERF_B-2  | BnaC03g38390D |  |  | 1R-MYB   | BnaA01g00920D | III | BnaA01g07600D |  |  |
| ERF_B-4  | BnaC02g04660D |  |  | 1R-MYB   | BnaCnng35740D | III | BnaAnng19940D |  |  |
| DREB_A-4 | BnaC07g29050D |  |  | R2R3-MYB | BnaA03g02860D | III | BnaC09g33190D |  |  |
| ERF      | BnaA03g19580D |  |  | R2R3-MYB | BnaCnng76050D | III | BnaAnng33660D |  |  |
| DREB_A-5 | BnaC04g35800D |  |  | 3R-MYB   | BnaC05g43530D | III | BnaC05g21870D |  |  |
| ERF_B-1  | BnaC05g31720D |  |  | 1R-MYB   | BnaC08g30340D | III | BnaA07g08370D |  |  |
| DREB_A-4 | BnaCnng48950D |  |  | 1R-MYB   | BnaA05g01400D | III | BnaC07g10350D |  |  |
| DREB_A-4 | BnaC09g50850D |  |  | 1R-MYB   | BnaC08g23560D | III | BnaA03g49310D |  |  |
| ERF_B-5  | BnaCnng17120D |  |  | 1R-MYB   | BnaC05g00840D | III | BnaC07g41360D |  |  |
| ERF_B-3  | BnaA04g25900D |  |  | R2R3-MYB | BnaC08g48630D | III | BnaA01g08370D |  |  |
| ERF_B-2  | BnaC05g36570D |  |  | R2R3-MYB | BnaA02g29620D | III | BnaC01g09920D |  |  |
| ERF_B-6  | BnaA02g04480D |  |  | R2R3-MYB | BnaC04g27380D | II  | BnaA09g00360D |  |  |
| DREB_A-6 | BnaC03g60650D |  |  | 1R-MYB   | BnaC02g27500D | II  | BnaCnng01350D |  |  |
| ERF_B-1  | BnaA10g02160D |  |  | 1R-MYB   | BnaAnng39410D | II  | BnaC03g31420D |  |  |
| DREB_A-4 | BnaC09g51170D |  |  | R2R3-MYB | BnaC03g55560D | II  | BnaA09g00430D |  |  |
| ERF_B-2  | BnaA07g23090D |  |  | 1R-MYB   | BnaA03g21400D | II  | BnaA09g00440D |  |  |
| ERF_B-1  | BnaC02g08170D |  |  | R2R3-MYB | BnaA09g39030D | II  | BnaCnng01250D |  |  |
| ERF_B-1  | BnaC03g39000D |  |  | R2R3-MYB | BnaA09g06090D | II  | BnaCnng35260D |  |  |
| ERF_B-3  | BnaAnng12120D |  |  | R2R3-MYB | BnaC04g08340D | II  | BnaA05g13300D |  |  |
| ERF_B-4  | BnaC03g05820D |  |  | 3R-MYB   | BnaC03g66940D | II  | BnaCnng55820D |  |  |
| ERF_B-4  | BnaA02g34370D |  |  | 1R-MYB   | BnaC01g22100D | II  | BnaA05g13270D |  |  |
| ERF_B-1  | BnaCnng67070D |  |  | R2R3-MYB | BnaA05g27620D | II  | BnaCnng43170D |  |  |
| DREB_A-5 | BnaC08g04820D |  |  | 3R-MYB   | BnaA03g03390D | II  | BnaC04g01390D |  |  |
| ERF_B-3  | BnaC04g49870D |  |  | R2R3-MYB | BnaA08g22580D | II  | BnaC04g01450D |  |  |
| ERF_B-3  | BnaA03g52830D |  |  | R2R3-MYB | BnaC03g55550D | II  | BnaA05g01770D |  |  |
| DREB_A-2 | BnaA03g55280D |  |  | 1R-MYB   | BnaC09g01550D | II  | BnaA05g01730D |  |  |
| ERF_B-2  | BnaC05g39400D |  |  | 1R-MYB   | BnaA05g28870D | II  | BnaA10g11790D |  |  |
| ERF_B-3  | BnaA01g23960D |  |  | 1R-MYB   | BnaA01g21650D | II  | BnaC09g34230D |  |  |
| ERF      | BnaCnng60480D |  |  | R2R3-MYB | BnaAnng02150D | II  | BnaC09g34220D |  |  |
| DREB_A-4 | BnaC04g08850D |  |  | R2R3-MYB | BnaA01g21090D | II  | BnaC02g10100D |  |  |
| ERF      | BnaC03g26480D |  |  | 1R-MYB   | BnaA06g37640D | II  | BnaC02g10340D |  |  |
| RAV      | BnaAnng40580D |  |  | 1R-MYB   | BnaA03g34320D | II  | BnaC02g10310D |  |  |
| ERF_B-3  | BnaC07g31350D |  |  | 1R-MYB   | BnaA09g07290D | II  | BnaC03g51020D |  |  |

|          |               |  |  |          |               |    |               |  |  |
|----------|---------------|--|--|----------|---------------|----|---------------|--|--|
| ERF_B-6  | BnaC05g11660D |  |  | 1R-MYB   | BnaC08g36920D | II | BnaC09g18980D |  |  |
| DREB_A-4 | BnaA01g18170D |  |  | R2R3-MYB | BnaA03g04050D | II | BnaA01g22100D |  |  |
| AP2      | BnaA08g15790D |  |  | 1R-MYB   | BnaAnng38130D | II | BnaA01g22280D |  |  |
| ERF_B-5  | BnaCnng38100D |  |  | 1R-MYB   | BnaC08g28910D | II | BnaC01g43190D |  |  |
| DREB_A-5 | BnaA07g29400D |  |  | R2R3-MYB | BnaAnng07760D | II | BnaC01g43150D |  |  |
| ERF_B-1  | BnaCnng63180D |  |  | R2R3-MYB | BnaA05g27610D | II | BnaCnng48900D |  |  |
| DREB_A-4 | BnaA03g20950D |  |  | 1R-MYB   | BnaA03g12400D | II | BnaA09g19790D |  |  |
| DREB_A-4 | BnaC09g28540D |  |  | R2R3-MYB | BnaA06g29540D | II | BnaA10g10080D |  |  |
| ERF_B-3  | BnaC07g20040D |  |  | 1R-MYB   | BnaC05g36490D | II | BnaCnng32040D |  |  |
| ERF_B-5  | BnaC08g12710D |  |  | 1R-MYB   | BnaA08g22290D | II | BnaC09g32530D |  |  |
| DREB_A-4 | BnaA07g23500D |  |  | R2R3-MYB | BnaC03g08600D | II | BnaA10g10100D |  |  |
| ERF_B-1  | BnaC09g39250D |  |  | R2R3-MYB | BnaA03g39790D | II | BnaA06g25650D |  |  |
| DREB_A-5 | BnaA04g13590D |  |  | 1R-MYB   | BnaA09g44970D | II | BnaA10g10240D |  |  |
| DREB_A-5 | BnaA01g06090D |  |  | R2R3-MYB | BnaC08g26660D | I  | BnaAnng36380D |  |  |
| ERF_B-1  | BnaC07g11010D |  |  | R2R3-MYB | BnaC05g14250D | I  | BnaC05g07680D |  |  |
| AP2      | BnaA09g34250D |  |  | R2R3-MYB | BnaCnng46710D | I  | BnaA04g02600D |  |  |
| ERF_B-3  | BnaA08g08300D |  |  | R2R3-MYB | BnaCnng44540D |    |               |  |  |
| ERF_B-1  | BnaA03g07180D |  |  | R2R3-MYB | BnaA03g30840D |    |               |  |  |
| DREB_A-6 | BnaC01g20660D |  |  | R2R3-MYB | BnaCnng13370D |    |               |  |  |
| DREB_A-2 | BnaA09g36920D |  |  | R2R3-MYB | BnaC04g41990D |    |               |  |  |
| DREB_A-6 | BnaA03g54460D |  |  | R2R3-MYB | BnaCnng06440D |    |               |  |  |
| AP2      | BnaC03g61270D |  |  | R2R3-MYB | BnaC03g43590D |    |               |  |  |
| DREB_A-2 | BnaC06g43980D |  |  | R2R3-MYB | BnaC04g05500D |    |               |  |  |
| ERF_B-3  | BnaAnng07060D |  |  | 1R-MYB   | BnaC08g30630D |    |               |  |  |
| ERF_B-1  | BnaA07g08610D |  |  | 1R-MYB   | BnaCnng08670D |    |               |  |  |
| ERF_B-3  | BnaC01g10100D |  |  | 1R-MYB   | BnaA09g11280D |    |               |  |  |
| DREB_A-6 | BnaA08g16220D |  |  | 1R-MYB   | BnaA01g17750D |    |               |  |  |
| AP2      | BnaC06g40040D |  |  | 1R-MYB   | BnaA09g00080D |    |               |  |  |
| DREB_A-6 | BnaC02g43540D |  |  | 1R-MYB   | BnaC07g31550D |    |               |  |  |
| ERF_B-1  | BnaA09g27310D |  |  | R2R3-MYB | BnaC07g08510D |    |               |  |  |
| ERF_B-1  | BnaA08g18380D |  |  | R2R3-MYB | BnaC03g36160D |    |               |  |  |
| DREB_A-1 | BnaC07g39680D |  |  | R2R3-MYB | BnaC03g28550D |    |               |  |  |
| ERF_B-3  | BnaA09g18210D |  |  | 1R-MYB   | BnaC01g00270D |    |               |  |  |
| ERF_B-6  | BnaA09g28560D |  |  | R2R3-MYB | BnaA03g58600D |    |               |  |  |
| ERF_B-1  | BnaA02g01920D |  |  | R2R3-MYB | BnaA06g31220D |    |               |  |  |
| ERF_B-3  | BnaAnng40920D |  |  | R2R3-MYB | BnaC09g02180D |    |               |  |  |
| DREB_A-2 | BnaA02g35180D |  |  | R2R3-MYB | BnaA02g35530D |    |               |  |  |
| DREB_A-2 | BnaA01g31290D |  |  | 3R-MYB   | BnaC01g05660D |    |               |  |  |
| RAV      | BnaC05g20560D |  |  | 1R-MYB   | BnaA07g31770D |    |               |  |  |
| ERF_B-3  | BnaC09g05370D |  |  | 1R-MYB   | BnaC07g33430D |    |               |  |  |
| ERF_B-1  | BnaA08g18390D |  |  | R2R3-MYB | BnaAnng32120D |    |               |  |  |
| ERF_B-1  | BnaC03g58300D |  |  | R2R3-MYB | BnaCnng28030D |    |               |  |  |
| ERF_B-3  | BnaA10g27750D |  |  | 1R-MYB   | BnaC03g16910D |    |               |  |  |
| DREB_A-5 | BnaC08g18660D |  |  | R2R3-MYB | BnaA07g38030D |    |               |  |  |
| ERF_B-3  | BnaC02g48800D |  |  | R2R3-MYB | BnaC04g32550D |    |               |  |  |
| DREB_A-6 | BnaC07g50590D |  |  | R2R3-MYB | BnaC02g03720D |    |               |  |  |
| ERF_B-3  | BnaC04g25670D |  |  | R2R3-MYB | BnaA07g25720D |    |               |  |  |
| AP2      | BnaC05g12270D |  |  | R2R3-MYB | BnaA09g48440D |    |               |  |  |
| DREB_A-1 | BnaA08g30910D |  |  | R2R3-MYB | BnaC05g48910D |    |               |  |  |
| ERF_B-3  | BnaC05g02480D |  |  | R2R3-MYB | BnaA03g24010D |    |               |  |  |
| DREB_A-6 | BnaA03g49050D |  |  | R2R3-MYB | BnaC05g06410D |    |               |  |  |
| DREB_A-5 | BnaC06g38250D |  |  | R2R3-MYB | BnaC08g37160D |    |               |  |  |
| ERF_B-3  | BnaAnng21280D |  |  | R2R3-MYB | BnaA02g30960D |    |               |  |  |
| DREB_A-6 | BnaC01g00660D |  |  | 1R-MYB   | BnaA08g11190D |    |               |  |  |
| DREB_A-6 | BnaA01g16910D |  |  | 1R-MYB   | BnaA02g17000D |    |               |  |  |
| DREB_A-5 | BnaA08g04090D |  |  | 1R-MYB   | BnaA07g00280D |    |               |  |  |
| DREB_A-5 | BnaC08g36830D |  |  | R2R3-MYB | BnaC04g32680D |    |               |  |  |
| AP2      | BnaC07g46770D |  |  | 1R-MYB   | BnaA04g29720D |    |               |  |  |
| DREB_A-5 | BnaC06g32600D |  |  | R2R3-MYB | BnaA01g30300D |    |               |  |  |
| DREB_A-5 | BnaAnng03730D |  |  | R2R3-MYB | BnaC03g06900D |    |               |  |  |
| DREB_A-6 | BnaC06g38580D |  |  | R2R3-MYB | BnaA02g00440D |    |               |  |  |
| ERF_B-1  | BnaA03g04570D |  |  | 1R-MYB   | BnaC09g02330D |    |               |  |  |
| ERF_B-1  | BnaA03g35680D |  |  | R2R3-MYB | BnaCnng63810D |    |               |  |  |
| DREB_A-5 | BnaCnng39660D |  |  | R2R3-MYB | BnaC03g71630D |    |               |  |  |
| ERF_B-1  | BnaA06g01090D |  |  | R2R3-MYB | BnaA01g23930D |    |               |  |  |
| ERF_B-5  | BnaA08g20700D |  |  | R2R3-MYB | BnaA01g30350D |    |               |  |  |
| ERF_B-3  | BnaA05g11530D |  |  | R2R3-MYB | BnaA07g31680D |    |               |  |  |
| DREB_A-4 | BnaAnng41450D |  |  | R2R3-MYB | BnaA07g31550D |    |               |  |  |
| ERF_B-4  | BnaA10g19960D |  |  | 1R-MYB   | BnaA03g06490D |    |               |  |  |
| ERF_B-1  | BnaC07g10670D |  |  | R2R3-MYB | BnaAnng35730D |    |               |  |  |
| RAV      | BnaA02g27630D |  |  | 1R-MYB   | BnaA10g28420D |    |               |  |  |
| ERF_B-1  | BnaA09g27330D |  |  | R2R3-MYB | BnaC04g45680D |    |               |  |  |
| DREB_A-4 | BnaA06g27900D |  |  | R2R3-MYB | BnaC08g18080D |    |               |  |  |
| ERF_B-2  | BnaA04g27050D |  |  | R2R3-MYB | BnaCnng28250D |    |               |  |  |
| ERF_B-3  | BnaCnng36390D |  |  | 1R-MYB   | BnaA09g18280D |    |               |  |  |
| ERF_B-3  | BnaA03g40370D |  |  | 1R-MYB   | BnaA03g00640D |    |               |  |  |
| ERF_B-4  | BnaC02g01680D |  |  | R2R3-MYB | BnaA03g27440D |    |               |  |  |

|          |               |  |  |          |               |  |  |  |  |
|----------|---------------|--|--|----------|---------------|--|--|--|--|
| DREB_A-4 | BnaA03g16280D |  |  | R2R3-MYB | BnaA08g19860D |  |  |  |  |
| ERF_B-2  | BnaA05g25200D |  |  | 1R-MYB   | BnaA01g08890D |  |  |  |  |
| ERF_B-5  | BnaAnng36370D |  |  | R2R3-MYB | BnaC04g43020D |  |  |  |  |
| ERF      | BnaC09g40510D |  |  | R2R3-MYB | BnaC07g39760D |  |  |  |  |
| ERF_B-6  | BnaC03g09750D |  |  | 1R-MYB   | BnaCnng47140D |  |  |  |  |
| ERF_B-5  | BnaA08g13940D |  |  | 3R-MYB   | BnaA01g04220D |  |  |  |  |
| DREB_A-5 | BnaA10g27820D |  |  | 1R-MYB   | BnaAnng06930D |  |  |  |  |
| AP2      | BnaC01g01290D |  |  | R2R3-MYB | BnaA03g37280D |  |  |  |  |
| RAV      | BnaA08g02030D |  |  | R2R3-MYB | BnaCnng69610D |  |  |  |  |
| DREB_A-2 | BnaC09g39350D |  |  | 1R-MYB   | BnaC01g21680D |  |  |  |  |
| ERF_B-6  | BnaA02g13950D |  |  | 1R-MYB   | BnaC04g03690D |  |  |  |  |
| ERF_B-6  | BnaC07g23080D |  |  | 1R-MYB   | BnaC04g01230D |  |  |  |  |
| DREB_A-4 | BnaC07g43950D |  |  | R2R3-MYB | BnaA03g04840D |  |  |  |  |
| ERF_B-5  | BnaC03g14960D |  |  | R2R3-MYB | BnaA05g00710D |  |  |  |  |
| ERF_B-3  | BnaC04g13510D |  |  | R2R3-MYB | BnaC02g22880D |  |  |  |  |
| DREB_A-4 | BnaCnng08620D |  |  | R2R3-MYB | BnaA06g38670D |  |  |  |  |
| DREB_A-5 | BnaA02g15410D |  |  | R2R3-MYB | BnaA05g05710D |  |  |  |  |
| DREB_A-4 | BnaC04g09380D |  |  | R2R3-MYB | BnaA02g33410D |  |  |  |  |
| ERF_B-3  | BnaC04g53270D |  |  | 1R-MYB   | BnaA10g11980D |  |  |  |  |
| RAV      | BnaC02g35650D |  |  | R2R3-MYB | BnaA05g26450D |  |  |  |  |
| DREB_A-5 | BnaA01g00710D |  |  | 1R-MYB   | BnaAnng34960D |  |  |  |  |
| AP2      | BnaA03g53830D |  |  | 1R-MYB   | BnaC09g40660D |  |  |  |  |
| DREB_A-5 | BnaAnng29870D |  |  | 1R-MYB   | BnaA05g37380D |  |  |  |  |
| AP2      | BnaC08g25150D |  |  | R2R3-MYB | BnaC09g42790D |  |  |  |  |
| ERF_B-1  | BnaA07g08440D |  |  | R2R3-MYB | BnaC03g20340D |  |  |  |  |
| DREB_A-6 | BnaAnng09570D |  |  | 3R-MYB   | BnaC01g12000D |  |  |  |  |
| DREB_A-4 | BnaA03g56380D |  |  | R2R3-MYB | BnaC03g21050D |  |  |  |  |
| ERF_B-6  | BnaC02g40810D |  |  | R2R3-MYB | BnaA03g30340D |  |  |  |  |
| DREB_A-6 | BnaC04g34610D |  |  | 1R-MYB   | BnaA10g00430D |  |  |  |  |
| ERF_B-6  | BnaA04g14840D |  |  | R2R3-MYB | BnaC08g07960D |  |  |  |  |
| DREB_A-4 | BnaCnng07950D |  |  | R2R3-MYB | BnaA10g10250D |  |  |  |  |
| DREB_A-2 | BnaA04g29310D |  |  | R2R3-MYB | BnaA03g12690D |  |  |  |  |
| AP2      | BnaA07g35130D |  |  | R2R3-MYB | BnaA09g44780D |  |  |  |  |
| ERF      | BnaA05g02350D |  |  | 1R-MYB   | BnaC07g03440D |  |  |  |  |
| ERF_B-5  | BnaC03g29310D |  |  | R2R3-MYB | BnaC07g25120D |  |  |  |  |
| ERF_B-6  | BnaA09g04580D |  |  | 1R-MYB   | BnaC08g10700D |  |  |  |  |
| ERF_B-1  | BnaCnng78540D |  |  | R2R3-MYB | BnaA10g19370D |  |  |  |  |
| RAV      | BnaCnng33070D |  |  | R2R3-MYB | BnaC07g25960D |  |  |  |  |
| ERF      | BnaC06g15540D |  |  | 1R-MYB   | BnaC06g32180D |  |  |  |  |
| ERF_B-3  | BnaAnng06420D |  |  | 1R-MYB   | BnaC05g44230D |  |  |  |  |
| ERF_B-1  | BnaC05g38410D |  |  | R2R3-MYB | BnaA06g12690D |  |  |  |  |
| ERF_B-4  | BnaA06g23710D |  |  | R2R3-MYB | BnaC06g23040D |  |  |  |  |
| ERF_B-6  | BnaC06g25810D |  |  | R2R3-MYB | BnaC05g22860D |  |  |  |  |
| DREB_A-4 | BnaC07g33940D |  |  | R2R3-MYB | BnaC07g28680D |  |  |  |  |
| DREB_A-5 | BnaA07g31860D |  |  | R2R3-MYB | BnaC05g04250D |  |  |  |  |
| ERF_B-5  | BnaA02g35550D |  |  | 1R-MYB   | BnaA07g36940D |  |  |  |  |
| ERF_B-3  | BnaC09g20090D |  |  | R2R3-MYB | BnaC01g26440D |  |  |  |  |
| ERF_B-2  | BnaA01g27570D |  |  | 1R-MYB   | BnaA06g12480D |  |  |  |  |
| DREB_A-1 | BnaCnng31550D |  |  | 1R-MYB   | BnaCnng59200D |  |  |  |  |
| ERF      | BnaA10g29740D |  |  | R2R3-MYB | BnaC03g64160D |  |  |  |  |
| ERF_B-4  | BnaC09g48530D |  |  | R2R3-MYB | BnaC07g27140D |  |  |  |  |
| ERF_B-5  | BnaC07g13400D |  |  | 1R-MYB   | BnaA06g05610D |  |  |  |  |
| RAV      | BnaC07g22870D |  |  | 1R-MYB   | BnaC08g32380D |  |  |  |  |
| DREB_A-4 | BnaA09g10750D |  |  | R2R3-MYB | BnaA08g26320D |  |  |  |  |
| ERF_B-4  | BnaC09g06610D |  |  | 1R-MYB   | BnaA01g34510D |  |  |  |  |
| DREB_A-5 | BnaC06g35730D |  |  | 1R-MYB   | BnaC08g17410D |  |  |  |  |
| DREB_A-5 | BnaA07g10270D |  |  | 1R-MYB   | BnaC07g33650D |  |  |  |  |
| DREB_A-4 | BnaA01g04150D |  |  | 1R-MYB   | BnaC09g15550D |  |  |  |  |
| ERF_B-3  | BnaA05g04380D |  |  | 1R-MYB   | BnaCnng62030D |  |  |  |  |
|          |               |  |  | R2R3-MYB | BnaC03g71080D |  |  |  |  |
|          |               |  |  | R2R3-MYB | BnaCnng06970D |  |  |  |  |
|          |               |  |  | 1R-MYB   | BnaA03g52170D |  |  |  |  |
|          |               |  |  | R2R3-MYB | BnaC05g41910D |  |  |  |  |
|          |               |  |  | R2R3-MYB | BnaC09g35120D |  |  |  |  |
|          |               |  |  | 3R-MYB   | BnaAnng13080D |  |  |  |  |
|          |               |  |  | 1R-MYB   | BnaCnng72020D |  |  |  |  |
|          |               |  |  | R2R3-MYB | BnaA08g00060D |  |  |  |  |
|          |               |  |  | R2R3-MYB | BnaA03g11930D |  |  |  |  |
|          |               |  |  | R2R3-MYB | BnaAnng19460D |  |  |  |  |
|          |               |  |  | R2R3-MYB | BnaA02g03700D |  |  |  |  |
|          |               |  |  | 1R-MYB   | BnaA05g29910D |  |  |  |  |
|          |               |  |  | 1R-MYB   | BnaC03g15430D |  |  |  |  |
|          |               |  |  | R2R3-MYB | BnaA07g06740D |  |  |  |  |
|          |               |  |  | 1R-MYB   | BnaAnng35540D |  |  |  |  |
|          |               |  |  | 1R-MYB   | BnaA09g10270D |  |  |  |  |
|          |               |  |  | R2R3-MYB | BnaA03g21790D |  |  |  |  |
|          |               |  |  | R2R3-MYB | BnaC03g11590D |  |  |  |  |

|  |  |  |  |          |               |  |  |  |  |
|--|--|--|--|----------|---------------|--|--|--|--|
|  |  |  |  | 1R-MYB   | BnaA02g07870D |  |  |  |  |
|  |  |  |  | 1R-MYB   | BnaA07g32000D |  |  |  |  |
|  |  |  |  | R2R3-MYB | BnaCnng16520D |  |  |  |  |
|  |  |  |  | 1R-MYB   | BnaA06g28660D |  |  |  |  |
|  |  |  |  | R2R3-MYB | BnaC09g49710D |  |  |  |  |
|  |  |  |  | 1R-MYB   | BnaC05g36990D |  |  |  |  |
|  |  |  |  | R2R3-MYB | BnaA08g22850D |  |  |  |  |
|  |  |  |  | R2R3-MYB | BnaA03g09270D |  |  |  |  |
|  |  |  |  | 1R-MYB   | BnaA03g26820D |  |  |  |  |
|  |  |  |  | R2R3-MYB | BnaA07g12970D |  |  |  |  |
|  |  |  |  | 1R-MYB   | BnaA07g29070D |  |  |  |  |
|  |  |  |  | R2R3-MYB | BnaC02g04390D |  |  |  |  |
|  |  |  |  | 1R-MYB   | BnaCnng59970D |  |  |  |  |
|  |  |  |  | R2R3-MYB | BnaA08g26750D |  |  |  |  |
|  |  |  |  | 1R-MYB   | BnaC05g35410D |  |  |  |  |
|  |  |  |  | 1R-MYB   | BnaA10g23980D |  |  |  |  |
|  |  |  |  | R2R3-MYB | BnaAnng06040D |  |  |  |  |
|  |  |  |  | R2R3-MYB | BnaA03g55780D |  |  |  |  |
|  |  |  |  | R2R3-MYB | BnaA03g11630D |  |  |  |  |
|  |  |  |  | R2R3-MYB | BnaA07g05740D |  |  |  |  |
|  |  |  |  | R2R3-MYB | BnaA05g07510D |  |  |  |  |
|  |  |  |  | R2R3-MYB | BnaC09g42570D |  |  |  |  |
|  |  |  |  | 1R-MYB   | BnaC09g29430D |  |  |  |  |
|  |  |  |  | 1R-MYB   | BnaC03g12320D |  |  |  |  |
|  |  |  |  | 1R-MYB   | BnaC05g17030D |  |  |  |  |
|  |  |  |  | R2R3-MYB | BnaA01g12370D |  |  |  |  |
|  |  |  |  | 1R-MYB   | BnaA06g25300D |  |  |  |  |
|  |  |  |  | 1R-MYB   | BnaC01g03950D |  |  |  |  |
|  |  |  |  | R2R3-MYB | BnaA01g32800D |  |  |  |  |
|  |  |  |  | R2R3-MYB | BnaA10g17890D |  |  |  |  |
|  |  |  |  | R2R3-MYB | BnaA05g33770D |  |  |  |  |
|  |  |  |  | R2R3-MYB | BnaA02g02580D |  |  |  |  |
|  |  |  |  | R2R3-MYB | BnaA06g29370D |  |  |  |  |
|  |  |  |  | 1R-MYB   | BnaA03g34140D |  |  |  |  |
|  |  |  |  | 1R-MYB   | BnaA01g16760D |  |  |  |  |
|  |  |  |  | 1R-MYB   | BnaA03g29470D |  |  |  |  |
|  |  |  |  | 1R-MYB   | BnaC01g27820D |  |  |  |  |
|  |  |  |  | R2R3-MYB | BnaA06g12860D |  |  |  |  |
|  |  |  |  | R2R3-MYB | BnaCnng58140D |  |  |  |  |
|  |  |  |  | R2R3-MYB | BnaAnng15260D |  |  |  |  |
|  |  |  |  | 1R-MYB   | BnaC09g50770D |  |  |  |  |
|  |  |  |  | 1R-MYB   | BnaC03g48330D |  |  |  |  |
|  |  |  |  | R2R3-MYB | BnaC04g35730D |  |  |  |  |
|  |  |  |  | R2R3-MYB | BnaA03g01420D |  |  |  |  |
|  |  |  |  | 1R-MYB   | BnaCnng01850D |  |  |  |  |
|  |  |  |  | 1R-MYB   | BnaAnng21440D |  |  |  |  |
|  |  |  |  | 1R-MYB   | BnaC08g03980D |  |  |  |  |
|  |  |  |  | R2R3-MYB | BnaC08g42690D |  |  |  |  |
|  |  |  |  | R2R3-MYB | BnaC01g01660D |  |  |  |  |
|  |  |  |  | 1R-MYB   | BnaA10g00780D |  |  |  |  |
|  |  |  |  | R2R3-MYB | BnaCnng52970D |  |  |  |  |
|  |  |  |  | R2R3-MYB | BnaA03g06190D |  |  |  |  |
|  |  |  |  | R2R3-MYB | BnaCnng01000D |  |  |  |  |
|  |  |  |  | R2R3-MYB | BnaA08g16990D |  |  |  |  |
|  |  |  |  | 1R-MYB   | BnaC07g30660D |  |  |  |  |
|  |  |  |  | R2R3-MYB | BnaC09g41070D |  |  |  |  |
|  |  |  |  | 1R-MYB   | BnaA02g36430D |  |  |  |  |
|  |  |  |  | R2R3-MYB | BnaCnng49790D |  |  |  |  |
|  |  |  |  | R2R3-MYB | BnaA03g47510D |  |  |  |  |
|  |  |  |  | R2R3-MYB | BnaC03g12860D |  |  |  |  |
|  |  |  |  | R2R3-MYB | BnaA03g53870D |  |  |  |  |
|  |  |  |  | 1R-MYB   | BnaA09g40030D |  |  |  |  |
|  |  |  |  | R2R3-MYB | BnaA10g12770D |  |  |  |  |
|  |  |  |  | R2R3-MYB | BnaC07g27330D |  |  |  |  |
|  |  |  |  | R2R3-MYB | BnaA07g20440D |  |  |  |  |
|  |  |  |  | 1R-MYB   | BnaUnng04070D |  |  |  |  |
|  |  |  |  | R2R3-MYB | BnaC09g11720D |  |  |  |  |
|  |  |  |  | R2R3-MYB | BnaA07g31540D |  |  |  |  |
|  |  |  |  | R2R3-MYB | BnaC05g17910D |  |  |  |  |
|  |  |  |  | 1R-MYB   | BnaA03g41680D |  |  |  |  |
|  |  |  |  | R2R3-MYB | BnaC02g05270D |  |  |  |  |
|  |  |  |  | R2R3-MYB | BnaA09g33480D |  |  |  |  |
|  |  |  |  | R2R3-MYB | BnaC03g06410D |  |  |  |  |
|  |  |  |  | R2R3-MYB | BnaC01g37360D |  |  |  |  |
|  |  |  |  | R2R3-MYB | BnaC09g12530D |  |  |  |  |
|  |  |  |  | 1R-MYB   | BnaCnng52990D |  |  |  |  |
|  |  |  |  | R2R3-MYB | BnaCnng51960D |  |  |  |  |



|  |  |  |  |          |               |  |  |  |  |
|--|--|--|--|----------|---------------|--|--|--|--|
|  |  |  |  | 1R-MYB   | BnaC05g42410D |  |  |  |  |
|  |  |  |  | R2R3-MYB | BnaC05g44010D |  |  |  |  |
|  |  |  |  | R2R3-MYB | BnaA02g16690D |  |  |  |  |
|  |  |  |  | R2R3-MYB | BnaA01g16900D |  |  |  |  |
|  |  |  |  | 1R-MYB   | BnaC09g54190D |  |  |  |  |
|  |  |  |  | 1R-MYB   | BnaC04g22430D |  |  |  |  |
|  |  |  |  | R2R3-MYB | BnaC04g31750D |  |  |  |  |
|  |  |  |  | 1R-MYB   | BnaA10g26900D |  |  |  |  |
|  |  |  |  | R2R3-MYB | BnaA03g14350D |  |  |  |  |
|  |  |  |  | 1R-MYB   | BnaC05g07150D |  |  |  |  |
|  |  |  |  | 1R-MYB   | BnaC01g26310D |  |  |  |  |
|  |  |  |  | 1R-MYB   | BnaA08g23070D |  |  |  |  |
|  |  |  |  | R2R3-MYB | BnaC02g43910D |  |  |  |  |
|  |  |  |  | R2R3-MYB | BnaA07g22240D |  |  |  |  |
|  |  |  |  | 1R-MYB   | BnaA05g36000D |  |  |  |  |
|  |  |  |  | R2R3-MYB | BnaC02g44890D |  |  |  |  |
|  |  |  |  | 1R-MYB   | BnaA07g02020D |  |  |  |  |
|  |  |  |  | R2R3-MYB | BnaCnng75540D |  |  |  |  |
|  |  |  |  | 1R-MYB   | BnaA03g42350D |  |  |  |  |
|  |  |  |  | 1R-MYB   | BnaA09g14920D |  |  |  |  |
|  |  |  |  | R2R3-MYB | BnaCnng49840D |  |  |  |  |
|  |  |  |  | R2R3-MYB | BnaA07g18670D |  |  |  |  |
|  |  |  |  | 1R-MYB   | BnaA06g24950D |  |  |  |  |
|  |  |  |  | R2R3-MYB | BnaA06g31780D |  |  |  |  |
|  |  |  |  | R2R3-MYB | BnaC09g31560D |  |  |  |  |
|  |  |  |  | R2R3-MYB | BnaA01g30920D |  |  |  |  |
|  |  |  |  | R2R3-MYB | BnaC09g40110D |  |  |  |  |
|  |  |  |  | 1R-MYB   | BnaA07g24010D |  |  |  |  |
|  |  |  |  | R2R3-MYB | BnaC07g16030D |  |  |  |  |
|  |  |  |  | R2R3-MYB | BnaC06g35350D |  |  |  |  |
|  |  |  |  | 1R-MYB   | BnaC03g31750D |  |  |  |  |
|  |  |  |  | R2R3-MYB | BnaA10g21970D |  |  |  |  |
|  |  |  |  | R2R3-MYB | BnaAnng13560D |  |  |  |  |
|  |  |  |  | 3R-MYB   | BnaCnng03520D |  |  |  |  |
|  |  |  |  | R2R3-MYB | BnaAnng26800D |  |  |  |  |
|  |  |  |  | R2R3-MYB | BnaC01g03510D |  |  |  |  |
|  |  |  |  | R2R3-MYB | BnaC09g02660D |  |  |  |  |
|  |  |  |  | R2R3-MYB | BnaC06g22860D |  |  |  |  |
|  |  |  |  | 1R-MYB   | BnaAnng01040D |  |  |  |  |
|  |  |  |  | 1R-MYB   | BnaC07g28070D |  |  |  |  |
|  |  |  |  | R2R3-MYB | BnaAnng32620D |  |  |  |  |
|  |  |  |  | R2R3-MYB | BnaA01g08670D |  |  |  |  |
|  |  |  |  | R2R3-MYB | BnaC08g25380D |  |  |  |  |
|  |  |  |  | R2R3-MYB | BnaC02g40390D |  |  |  |  |
|  |  |  |  | 1R-MYB   | BnaC03g68390D |  |  |  |  |
|  |  |  |  | 1R-MYB   | BnaAnng25220D |  |  |  |  |
|  |  |  |  | R2R3-MYB | BnaA10g30020D |  |  |  |  |
|  |  |  |  | R2R3-MYB | BnaCnng17910D |  |  |  |  |
|  |  |  |  | R2R3-MYB | BnaC05g48630D |  |  |  |  |
|  |  |  |  | 1R-MYB   | BnaA01g05400D |  |  |  |  |
|  |  |  |  | 1R-MYB   | BnaC03g66110D |  |  |  |  |
|  |  |  |  | R2R3-MYB | BnaC02g39260D |  |  |  |  |
|  |  |  |  | 1R-MYB   | BnaC04g50810D |  |  |  |  |
|  |  |  |  | 1R-MYB   | BnaA03g10580D |  |  |  |  |
|  |  |  |  | R2R3-MYB | BnaA04g10420D |  |  |  |  |
|  |  |  |  | R2R3-MYB | BnaA05g37010D |  |  |  |  |
|  |  |  |  | 1R-MYB   | BnaC05g43350D |  |  |  |  |
|  |  |  |  | R2R3-MYB | BnaC03g03620D |  |  |  |  |
|  |  |  |  | R2R3-MYB | BnaC03g03210D |  |  |  |  |
|  |  |  |  | 1R-MYB   | BnaAnng15540D |  |  |  |  |
|  |  |  |  | R2R3-MYB | BnaA01g14800D |  |  |  |  |
|  |  |  |  | R2R3-MYB | BnaC06g08330D |  |  |  |  |
|  |  |  |  | R2R3-MYB | BnaA10g17700D |  |  |  |  |
|  |  |  |  | R2R3-MYB | BnaC04g52010D |  |  |  |  |
|  |  |  |  | R2R3-MYB | BnaA03g40190D |  |  |  |  |
|  |  |  |  | R2R3-MYB | BnaA03g12580D |  |  |  |  |
|  |  |  |  | R2R3-MYB | BnaC04g12330D |  |  |  |  |
|  |  |  |  | 1R-MYB   | BnaC04g00590D |  |  |  |  |
|  |  |  |  | R2R3-MYB | BnaCnng49340D |  |  |  |  |
|  |  |  |  | R2R3-MYB | BnaA07g28100D |  |  |  |  |
|  |  |  |  | R2R3-MYB | BnaA09g35310D |  |  |  |  |
|  |  |  |  | 1R-MYB   | BnaA03g42550D |  |  |  |  |
|  |  |  |  | R2R3-MYB | BnaC07g25380D |  |  |  |  |
|  |  |  |  | 1R-MYB   | BnaA09g00230D |  |  |  |  |
|  |  |  |  | 1R-MYB   | BnaC08g30650D |  |  |  |  |
|  |  |  |  | R2R3-MYB | BnaA09g52130D |  |  |  |  |
|  |  |  |  | R2R3-MYB | BnaC09g36060D |  |  |  |  |

|  |  |  |  |          |               |  |  |  |  |
|--|--|--|--|----------|---------------|--|--|--|--|
|  |  |  |  | R2R3-MYB | BnaC01g14080D |  |  |  |  |
|  |  |  |  | 1R-MYB   | BnaA01g21010D |  |  |  |  |
|  |  |  |  | 1R-MYB   | BnaA09g37190D |  |  |  |  |
|  |  |  |  | R2R3-MYB | BnaA05g25530D |  |  |  |  |
|  |  |  |  | R2R3-MYB | BnaC07g08320D |  |  |  |  |
|  |  |  |  | 1R-MYB   | BnaCnng03200D |  |  |  |  |
|  |  |  |  | R2R3-MYB | BnaC03g15570D |  |  |  |  |
|  |  |  |  | R2R3-MYB | BnaA06g31470D |  |  |  |  |
|  |  |  |  | R2R3-MYB | BnaCnng28540D |  |  |  |  |
|  |  |  |  | 4R-MYB   | BnaA05g22120D |  |  |  |  |
|  |  |  |  | R2R3-MYB | BnaC04g51450D |  |  |  |  |
|  |  |  |  | 1R-MYB   | BnaC04g08290D |  |  |  |  |
|  |  |  |  | 1R-MYB   | BnaA03g40600D |  |  |  |  |
|  |  |  |  | R2R3-MYB | BnaAnng13960D |  |  |  |  |
|  |  |  |  | 1R-MYB   | BnaCnng02030D |  |  |  |  |
|  |  |  |  | R2R3-MYB | BnaC03g60080D |  |  |  |  |
|  |  |  |  | R2R3-MYB | BnaCnng69750D |  |  |  |  |
|  |  |  |  | R2R3-MYB | BnaA07g10350D |  |  |  |  |
|  |  |  |  | R2R3-MYB | BnaA07g22130D |  |  |  |  |
|  |  |  |  | 1R-MYB   | BnaA06g25640D |  |  |  |  |
|  |  |  |  | 1R-MYB   | BnaC06g23020D |  |  |  |  |
|  |  |  |  | 1R-MYB   | BnaCnng66770D |  |  |  |  |
|  |  |  |  | 1R-MYB   | BnaC05g00500D |  |  |  |  |
|  |  |  |  | R2R3-MYB | BnaA06g31230D |  |  |  |  |
|  |  |  |  | R2R3-MYB | BnaA07g16010D |  |  |  |  |
|  |  |  |  | R2R3-MYB | BnaC05g39780D |  |  |  |  |
|  |  |  |  | 1R-MYB   | BnaCnng61080D |  |  |  |  |
|  |  |  |  | R2R3-MYB | BnaC08g37480D |  |  |  |  |
|  |  |  |  | 1R-MYB   | BnaC02g38120D |  |  |  |  |
|  |  |  |  | R2R3-MYB | BnaA02g31750D |  |  |  |  |
|  |  |  |  | 1R-MYB   | BnaC05g13640D |  |  |  |  |

**The identified five families of TFs in *B. rapa***

| Subfamily | BrAP2/EREBP | Subfami | BrbZIP    | Subfamily | BrMYB     | Subfamily | BrNAC     | Subfamily | BrWRKY    |
|-----------|-------------|---------|-----------|-----------|-----------|-----------|-----------|-----------|-----------|
| AP2       | Bra017852   | IX      | Bra037533 | 3R-MYB    | Bra011376 | XXI       | Bra025374 | GroupII-d | Bra011282 |
| RAV       | Bra018894   | IX      | Bra001742 | 1R-MYB    | Bra004539 | XXI       | Bra036223 | GroupII-b | Bra011299 |
| DREB_A-5  | Bra024539   | IX      | Bra022409 | R2R3-MYB  | Bra032176 | XXI       | Bra025658 | GroupII-c | Bra011861 |
| ERF_B-3   | Bra027493   | IX      | Bra018800 | 1R-MYB    | Bra016164 | XXI       | Bra028435 | GroupII-c | Bra013289 |
| ERF_B-3   | Bra017493   | IX      | Bra011485 | 1R-MYB    | Bra032635 | XX        | Bra028685 | GroupII-b | Bra013584 |
| ERF_B-3   | Bra021712   | IX      | Bra040260 | R2R3-MYB  | Bra012910 | XX        | Bra009246 | GroupII-e | Bra013708 |
| DREB_A-2  | Bra023674   | IX      | Bra016953 | R2R3-MYB  | Bra036317 | XX        | Bra029313 | GroupIII  | Bra013732 |
| DREB_A-4  | Bra029147   | IX      | Bra004597 | 1R-MYB    | Bra007892 | XX        | Bra012960 | GroupII-d | Bra013779 |
| DREB_A-6  | Bra010657   | IX      | Bra003253 | 1R-MYB    | Bra025967 | XIX       | Bra040153 | GroupII-e | Bra026228 |
| ERF_B-4   | Bra019622   | IX      | Bra014668 | 1R-MYB    | Bra020373 | XIX       | Bra031950 | GroupI    | Bra026414 |
| ERF_B-4   | Bra005480   | IX      | Bra007274 | R2R3-MYB  | Bra039344 | XIX       | Bra002148 | GroupI    | Bra026438 |
| ERF_B-1   | Bra010901   | IX      | Bra007276 | 1R-MYB    | Bra037839 | XIX       | Bra023669 | GroupII-b | Bra040505 |
| DREB_A-5  | Bra016518   | IX      | Bra019436 | 1R-MYB    | Bra019998 | XIX       | Bra006449 | GroupII-b | Bra007884 |
| DREB_A-5  | Bra040309   | IX      | Bra017251 | R2R3-MYB  | Bra029990 | XVIII     | Bra021592 | GroupII-b | Bra008435 |
| ERF_B-2   | Bra022176   | IX      | Bra005287 | 1R-MYB    | Bra027170 | XVIII     | Bra001586 | GroupIII  | Bra008454 |
| AP2       | Bra028584   | IX      | Bra033649 | 1R-MYB    | Bra034130 | XVIII     | Bra022685 | GroupIII  | Bra008459 |
| AP2       | Bra030451   | VIII    | Bra015281 | 1R-MYB    | Bra002145 | XVIII     | Bra003023 | GroupIII  | Bra020196 |
| DREB_A-4  | Bra007539   | VIII    | Bra033719 | R2R3-MYB  | Bra004394 | XVII      | Bra008259 | GroupIII  | Bra020197 |
| DREB_A-6  | Bra031880   | VII     | Bra013005 | 1R-MYB    | Bra003871 | XVII      | Bra015750 | GroupII-c | Bra020546 |
| DREB_A-4  | Bra008952   | VII     | Bra035957 | 1R-MYB    | Bra037045 | XVII      | Bra001705 | GroupII-d | Bra020617 |
| ERF_B-1   | Bra036016   | VII     | Bra029353 | R2R3-MYB  | Bra036202 | XVII      | Bra037585 | GroupII-c | Bra020628 |
| DREB_A-4  | Bra023026   | VII     | Bra005971 | R2R3-MYB  | Bra024224 | XVII      | Bra022319 | GroupII-c | Bra022033 |
| DREB_A-5  | Bra003780   | VII     | Bra025743 | R2R3-MYB  | Bra021033 | XVI       | Bra007855 | GroupII-e | Bra022612 |
| ERF_B-6   | Bra004318   | VII     | Bra038341 | 1R-MYB    | Bra004503 | XVI       | Bra032095 | GroupII-b | Bra023505 |
| ERF_B-5   | Bra003936   | VII     | Bra026895 | 1R-MYB    | Bra029380 | XV        | Bra027237 | GroupI    | Bra026554 |
| ERF_B-6   | Bra009837   | VII     | Bra026896 | R2R3-MYB  | Bra034738 | XV        | Bra021114 | GroupII-c | Bra028707 |
| ERF_B-3   | Bra027447   | VII     | Bra019715 | 3R-MYB    | Bra008956 | XV        | Bra001597 | GroupIII  | Bra028918 |
| DREB_A-2  | Bra008200   | VII     | Bra026523 | 3R-MYB    | Bra034531 | XV        | Bra018997 | GroupII-c | Bra031900 |
| DREB_A-4  | Bra012693   | VII     | Bra017359 | 1R-MYB    | Bra009245 | XV        | Bra027101 | GroupIII  | Bra033158 |
| DREB_A-2  | Bra028759   | VII     | Bra025144 | 1R-MYB    | Bra025973 | XV        | Bra003998 | GroupII-b | Bra033956 |
| DREB_A-2  | Bra015840   | VII     | Bra025418 | R2R3-MYB  | Bra023742 | XV        | Bra004385 | GroupII-c | Bra038313 |
| DREB_A-4  | Bra033274   | VII     | Bra020735 | 1R-MYB    | Bra009950 | XV        | Bra040152 | GroupI    | Bra000064 |
| DREB_A-2  | Bra006460   | VII     | Bra008670 | R2R3-MYB  | Bra013000 | XV        | Bra031949 | GroupIII  | Bra000202 |
| RAV       | Bra014282   | VII     | Bra023540 | R2R3-MYB  | Bra007186 | XV        | Bra027238 | GroupIII  | Bra000203 |
| RAV       | Bra024735   | VII     | Bra006324 | R2R3-MYB  | Bra001941 | XV        | Bra001596 | GroupII-c | Bra000362 |
| DREB_A-6  | Bra026280   | VI      | Bra039631 | 1R-MYB    | Bra008169 | XV        | Bra021113 | GroupIII  | Bra000423 |
| ERF_B-5   | Bra003068   | VI      | Bra024478 | R2R3-MYB  | Bra008875 | XV        | Bra018998 | GroupII-b | Bra000793 |
| ERF_B-6   | Bra020063   | VI      | Bra037235 | 1R-MYB    | Bra004831 | XV        | Bra026353 | GroupII-c | Bra001023 |
| ERF       | Bra007123   | VI      | Bra034639 | R2R3-MYB  | Bra003443 | XV        | Bra019052 | GroupII-d | Bra001117 |
| DREB_A-4  | Bra017302   | VI      | Bra011545 | 1R-MYB    | Bra024438 | XV        | Bra033239 | GroupII-c | Bra006178 |
| ERF_B-3   | Bra012939   | VI      | Bra017664 | 1R-MYB    | Bra011533 | XV        | Bra008309 | GroupII-b | Bra006283 |
| DREB_A-6  | Bra024358   | VI      | Bra015847 | R2R3-MYB  | Bra006694 | XV        | Bra029201 | GroupII-c | Bra012614 |
| DREB_A-6  | Bra030255   | VI      | Bra008192 | 1R-MYB    | Bra033527 | XV        | Bra038663 | GroupI    | Bra013187 |
| ERF_B-4   | Bra023404   | VI      | Bra003755 | 1R-MYB    | Bra008539 | XV        | Bra028645 | GroupII-c | Bra019095 |

|          |           |     |           |          |           |      |           |           |           |
|----------|-----------|-----|-----------|----------|-----------|------|-----------|-----------|-----------|
| DREB_A-2 | Bra005113 | VI  | Bra003500 | 1R-MYB   | Bra014227 | XV   | Bra006015 | GroupI    | Bra019105 |
| ERF_B-3  | Bra014924 | VI  | Bra007679 | 1R-MYB   | Bra039283 | XV   | Bra009370 | GroupII-b | Bra019123 |
| DREB_A-4 | Bra037041 | VI  | Bra011780 | R2R3-MYB | Bra021389 | XIV  | Bra031915 | GroupII-d | Bra019239 |
| DREB_A-5 | Bra006599 | VI  | Bra017850 | 1R-MYB   | Bra033257 | XIV  | Bra037779 | GroupIII  | Bra019265 |
| DREB_A-4 | Bra016136 | VI  | Bra036025 | R2R3-MYB | Bra008096 | XIV  | Bra024306 | GroupII-e | Bra019297 |
| DREB_A-4 | Bra017235 | VI  | Bra031845 | R2R3-MYB | Bra000531 | XIV  | Bra021856 | GroupI    | Bra022786 |
| ERF_B-1  | Bra030957 | VI  | Bra024424 | R2R3-MYB | Bra024526 | XIV  | Bra005492 | GroupII-d | Bra022808 |
| ERF_B-5  | Bra007963 | VI  | Bra027855 | R2R3-MYB | Bra030743 | XIV  | Bra006186 | GroupI    | Bra023112 |
| DREB_A-5 | Bra036061 | VI  | Bra010035 | R2R3-MYB | Bra030812 | XIV  | Bra023395 | GroupII-b | Bra023983 |
| ERF_B-6  | Bra019086 | VI  | Bra036142 | R2R3-MYB | Bra028369 | XIV  | Bra008849 | GroupII-d | Bra023998 |
| ERF_B-5  | Bra010389 | VI  | Bra004550 | R2R3-MYB | Bra023085 | XIII | Bra030820 | GroupI    | Bra024035 |
| DREB_A-4 | Bra027177 | VI  | Bra037382 | R2R3-MYB | Bra029258 | XIII | Bra001480 | GroupI    | Bra028939 |
| DREB_A-1 | Bra019777 | VI  | Bra011701 | R2R3-MYB | Bra039108 | XIII | Bra034713 | GroupI    | Bra028971 |
| AP2      | Bra011939 | VI  | Bra010572 | R2R3-MYB | Bra035954 | XIII | Bra010362 | GroupIII  | Bra014426 |
| AP2      | Bra034249 | VI  | Bra017316 | R2R3-MYB | Bra004456 | XIII | Bra011037 | GroupII-e | Bra014556 |
| ERF_B-4  | Bra037794 | VI  | Bra023243 | R2R3-MYB | Bra020837 | XIII | Bra024194 | GroupIII  | Bra014692 |
| DREB_A-4 | Bra009862 | VI  | Bra023012 | R2R3-MYB | Bra039036 | XIII | Bra000709 | GroupIII  | Bra014693 |
| DREB_A-2 | Bra014617 | VI  | Bra005335 | 1R-MYB   | Bra012936 | XIII | Bra037914 | GroupIII  | Bra016974 |
| DREB_A-5 | Bra017811 | V   | Bra020471 | R2R3-MYB | Bra023486 | XIII | Bra008423 | GroupIII  | Bra016975 |
| ERF_B-4  | Bra029302 | V   | Bra009793 | R2R3-MYB | Bra018027 | XIII | Bra035127 | GroupI    | Bra017117 |
| ERF_B-3  | Bra023748 | V   | Bra020620 | R2R3-MYB | Bra031035 | XIII | Bra003602 | GroupII-c | Bra021393 |
| AP2      | Bra008040 | V   | Bra010010 | R2R3-MYB | Bra005597 | XIII | Bra010077 | GroupI    | Bra021623 |
| DREB_A-6 | Bra003659 | V   | Bra036251 | 3R-MYB   | Bra006102 | XIII | Bra029264 | GroupII-d | Bra021652 |
| DREB_A-5 | Bra010258 | V   | Bra000102 | R2R3-MYB | Bra003413 | XIII | Bra029266 | GroupII-e | Bra021934 |
| ERF      | Bra010610 | V   | Bra014802 | R2R3-MYB | Bra013633 | XIII | Bra035896 | GroupII-c | Bra025490 |
| DREB_A-5 | Bra025719 | V   | Bra007083 | 1R-MYB   | Bra000456 | XIII | Bra004509 | GroupII-c | Bra030273 |
| ERF_B-6  | Bra036543 | IV  | Bra008976 | 1R-MYB   | Bra000941 | XIII | Bra040486 | GroupII-d | Bra032084 |
| DREB_A-5 | Bra036022 | IV  | Bra023317 | R2R3-MYB | Bra026048 | XIII | Bra003478 | GroupII-d | Bra032174 |
| RAV      | Bra026509 | IV  | Bra021258 | R2R3-MYB | Bra039339 | XIII | Bra007640 | GroupII-c | Bra004466 |
| ERF      | Bra004641 | IV  | Bra001671 | R2R3-MYB | Bra025564 | XIII | Bra023288 | GroupIII  | Bra004540 |
| ERF_B-4  | Bra006195 | IV  | Bra022225 | 1R-MYB   | Bra039503 | XIII | Bra010183 | GroupIII  | Bra004586 |
| ERF_B-1  | Bra006325 | III | Bra004689 | R2R3-MYB | Bra029129 | XIII | Bra016098 | GroupII-c | Bra004864 |
| ERF_B-3  | Bra004873 | III | Bra003320 | R2R3-MYB | Bra000453 | XIII | Bra007996 | GroupI    | Bra005104 |
| ERF_B-1  | Bra003701 | III | Bra007380 | R2R3-MYB | Bra028892 | XIII | Bra016783 | GroupI    | Bra005210 |
| DREB_A-5 | Bra016133 | III | Bra000256 | 1R-MYB   | Bra025914 | XIII | Bra019750 | GroupII-e | Bra005388 |
| ERF_B-1  | Bra006466 | III | Bra009288 | 1R-MYB   | Bra005997 | XIII | Bra026981 | GroupII-d | Bra018303 |
| RAV      | Bra038346 | III | Bra030310 | R2R3-MYB | Bra032028 | XIII | Bra027024 | GroupI    | Bra018325 |
| DREB_A-1 | Bra010463 | III | Bra030312 | R2R3-MYB | Bra027389 | XIII | Bra012065 | GroupII-c | Bra037106 |
| ERF_B-3  | Bra009250 | III | Bra032191 | R2R3-MYB | Bra034841 | XIII | Bra039915 | GroupI    | Bra039147 |
| DREB_A-5 | Bra012298 | III | Bra034916 | R2R3-MYB | Bra003801 | XIII | Bra011667 | GroupIII  | Bra009734 |
| ERF_B-4  | Bra008835 | III | Bra030314 | R2R3-MYB | Bra008705 | XIII | Bra017750 | GroupII-c | Bra009885 |
| ERF_B-2  | Bra021401 | III | Bra031172 | R2R3-MYB | Bra017963 | XII  | Bra016294 | GroupII-d | Bra010005 |
| DREB_A-6 | Bra010383 | III | Bra010722 | 1R-MYB   | Bra036412 | XII  | Bra024677 | GroupII-c | Bra010032 |
| ERF_B-1  | Bra010881 | III | Bra033582 | 1R-MYB   | Bra016530 | XII  | Bra004403 | GroupI    | Bra019697 |
| ERF_B-5  | Bra019270 | III | Bra030663 | R2R3-MYB | Bra022831 | XII  | Bra028441 | GroupII-c | Bra024328 |
| ERF_B-1  | Bra010972 | III | Bra031541 | R2R3-MYB | Bra034853 | XII  | Bra034719 | GroupI    | Bra024780 |
| ERF_B-1  | Bra012499 | III | Bra000195 | 1R-MYB   | Bra011870 | XII  | Bra039353 | GroupII-c | Bra025021 |
| AP2      | Bra018899 | III | Bra016980 | R2R3-MYB | Bra003793 | XII  | Bra037743 | GroupII-b | Bra025693 |
| ERF_B-1  | Bra032898 | III | Bra004582 | 1R-MYB   | Bra026297 | XII  | Bra000282 | GroupII-c | Bra033616 |
| ERF_B-2  | Bra003883 | III | Bra030637 | R2R3-MYB | Bra009346 | XII  | Bra004736 | GroupII-c | Bra038006 |
| ERF_B-3  | Bra015310 | III | Bra015471 | 1R-MYB   | Bra015766 | XI   | Bra013272 | GroupIII  | Bra003239 |
| ERF      | Bra000487 | III | Bra021735 | R2R3-MYB | Bra002107 | XI   | Bra012626 | GroupII-b | Bra003588 |
| ERF_B-3  | Bra021048 | III | Bra018250 | R2R3-MYB | Bra004297 | XI   | Bra022046 | GroupII-c | Bra004002 |
| ERF_B-1  | Bra001588 | II  | Bra034147 | R2R3-MYB | Bra022602 | XI   | Bra025012 | GroupII-b | Bra004285 |
| ERF_B-3  | Bra024954 | II  | Bra023224 | R2R3-MYB | Bra029553 | XI   | Bra035488 | GroupII-c | Bra004370 |
| ERF_B-6  | Bra004033 | II  | Bra016959 | 1R-MYB   | Bra027882 | XI   | Bra030807 | GroupII-b | Bra016263 |
| ERF_B-1  | Bra038261 | II  | Bra014680 | R2R3-MYB | Bra001284 | XI   | Bra003335 | GroupII-c | Bra030178 |
| ERF_B-1  | Bra006222 | I   | Bra034925 | R2R3-MYB | Bra033078 | XI   | Bra039745 | GroupII-b | Bra035148 |
| AP2      | Bra006065 | I   | Bra024310 | R2R3-MYB | Bra040274 | XI   | Bra022236 | GroupII-b | Bra010220 |
| DREB_A-4 | Bra016761 | I   | Bra013048 | 1R-MYB   | Bra012815 | XI   | Bra021366 | GroupII-d | Bra010231 |
| DREB_A-4 | Bra034535 | I   | Bra037290 | R2R3-MYB | Bra025311 | XI   | Bra032009 | GroupI    | Bra010266 |
| ERF_B-5  | Bra022643 | I   | Bra011580 | 1R-MYB   | Bra017943 | XI   | Bra008567 | GroupI    | Bra010431 |
| AP2      | Bra031234 | I   | Bra034668 | R2R3-MYB | Bra025574 | XI   | Bra006392 | GroupII-c | Bra010683 |
| ERF_B-3  | Bra032433 | I   | Bra006886 | 1R-MYB   | Bra014512 | X    | Bra034118 | GroupII-e | Bra010839 |
| DREB_A-6 | Bra040381 | I   | Bra033464 | 1R-MYB   | Bra037837 | X    | Bra034119 | GroupII-b | Bra016535 |
| DREB_A-5 | Bra014056 | I   | Bra024366 | R2R3-MYB | Bra012641 | X    | Bra029844 | GroupI    | Bra016716 |
| ERF      | Bra020262 | I   | Bra031871 | R2R3-MYB | Bra039040 | X    | Bra001365 | GroupII-e | Bra020814 |
| DREB_A-4 | Bra015686 | I   | Bra037809 | R2R3-MYB | Bra016285 | X    | Bra001366 | GroupII-c | Bra030847 |
| DREB_A-4 | Bra003415 | I   | Bra028604 | R2R3-MYB | Bra008740 | X    | Bra023314 | GroupII-c | Bra030848 |
| ERF_B-6  | Bra009824 | I   | Bra009063 | R2R3-MYB | Bra020228 | X    | Bra008980 | GroupIII  | Bra007243 |
| ERF_B-1  | Bra032900 | I   | Bra037374 | R2R3-MYB | Bra029033 | X    | Bra035712 | GroupII-e | Bra007413 |
| DREB_A-5 | Bra037124 | I   | Bra015646 | R2R3-MYB | Bra004155 | X    | Bra009456 | GroupII-c | Bra007674 |
| ERF_B-3  | Bra014925 | I   | Bra016389 | R2R3-MYB | Bra013900 | X    | Bra028790 | GroupII-c | Bra017561 |
| ERF_B-3  | Bra021047 | I   | Bra031364 | R2R3-MYB | Bra027668 | X    | Bra005804 | GroupIII  | Bra023211 |
| DREB_A-6 | Bra024357 | I   | Bra018634 | R2R3-MYB | Bra031847 | X    | Bra034120 | GroupIII  | Bra026467 |
| ERF_B-1  | Bra001784 | I   | Bra031622 | R2R3-MYB | Bra012038 | X    | Bra024263 | GroupI    | Bra026869 |
| DREB_A-2 | Bra017011 | I   | Bra004329 | R2R3-MYB | Bra006977 | X    | Bra009379 | GroupII-b | Bra027057 |

|          |           |   |           |          |           |      |           |           |           |
|----------|-----------|---|-----------|----------|-----------|------|-----------|-----------|-----------|
| ERF_B-3  | Bra018271 | I | Bra028713 | 1R-MYB   | Bra010560 | X    | Bra028640 | GroupII-c | Bra027480 |
| ERF_B-6  | Bra033923 | I | Bra009241 | 1R-MYB   | Bra016409 | X    | Bra006019 | GroupII-c | Bra027675 |
| ERF_B-1  | Bra008460 | I | Bra038705 | R2R3-MYB | Bra034842 | IX   | Bra017980 | GroupII-c | Bra027768 |
| ERF_B-3  | Bra017495 | I | Bra001443 | 1R-MYB   | Bra030496 | IX   | Bra019599 | GroupII-b | Bra029491 |
| ERF_B-1  | Bra027270 | I | Bra034767 | R2R3-MYB | Bra029582 | IX   | Bra009774 | GroupII-b | Bra031053 |
| ERF_B-3  | Bra023744 |   |           | R2R3-MYB | Bra006166 | IX   | Bra036520 | GroupII-c | Bra031221 |
| DREB_A-1 | Bra019162 |   |           | R2R3-MYB | Bra012149 | IX   | Bra010193 | GroupII-e | Bra032300 |
| ERF_B-6  | Bra016663 |   |           | 1R-MYB   | Bra016598 | IX   | Bra012024 | GroupII-c | Bra032340 |
| DREB_A-4 | Bra034273 |   |           | R2R3-MYB | Bra020744 | IX   | Bra021471 | GroupII-c | Bra036138 |
| ERF_B-3  | Bra032512 |   |           | R2R3-MYB | Bra028063 | IX   | Bra006619 | GroupII-b | Bra036315 |
| DREB_A-2 | Bra034159 |   |           | 1R-MYB   | Bra012183 | IX   | Bra020182 | GroupII-e | Bra037368 |
| ERF_B-3  | Bra028690 |   |           | R2R3-MYB | Bra023637 | IX   | Bra002403 | GroupII-c | Bra037796 |
| ERF_B-3  | Bra017612 |   |           | R2R3-MYB | Bra035532 | VIII | Bra034439 | GroupIII  | Bra002421 |
| DREB_A-2 | Bra007341 |   |           | R2R3-MYB | Bra025361 | VIII | Bra034436 | GroupI    | Bra002828 |
| ERF      | Bra023617 |   |           | R2R3-MYB | Bra011576 | VIII | Bra036744 | GroupII-b | Bra008719 |
| ERF_B-6  | Bra034250 |   |           | R2R3-MYB | Bra000038 | VIII | Bra028039 | GroupII-c | Bra008858 |
| DREB_A-4 | Bra010210 |   |           | R2R3-MYB | Bra008131 | VIII | Bra012342 | GroupII-d | Bra040396 |
| ERF_B-4  | Bra031903 |   |           | R2R3-MYB | Bra038774 | VIII | Bra013034 | GroupII-c | Bra040557 |
| DREB_A-5 | Bra011744 |   |           | 1R-MYB   | Bra007371 | VIII | Bra037283 | GroupII-e | Bra040926 |
| DREB_A-1 | Bra022770 |   |           | R2R3-MYB | Bra004162 | VIII | Bra002018 | GroupII-e | Bra041029 |
| ERF_B-1  | Bra023440 |   |           | R2R3-MYB | Bra033572 | VIII | Bra024818 |           |           |
| ERF_B-3  | Bra040159 |   |           | R2R3-MYB | Bra001907 | VIII | Bra026595 |           |           |
| ERF_B-1  | Bra018864 |   |           | R2R3-MYB | Bra010022 | VIII | Bra017416 |           |           |
| DREB_A-5 | Bra011244 |   |           | R2R3-MYB | Bra039395 | VIII | Bra019442 |           |           |
| DREB_A-6 | Bra008343 |   |           | R2R3-MYB | Bra022888 | VIII | Bra019459 |           |           |
| RAV      | Bra025159 |   |           | 1R-MYB   | Bra014169 | VIII | Bra006624 |           |           |
| AP2      | Bra024394 |   |           | 1R-MYB   | Bra034132 | VIII | Bra002408 |           |           |
| RAV      | Bra030458 |   |           | R2R3-MYB | Bra020289 | VIII | Bra020188 |           |           |
| DREB_A-4 | Bra040333 |   |           | R2R3-MYB | Bra006811 | VII  | Bra006229 |           |           |
| DREB_A-2 | Bra032665 |   |           | R2R3-MYB | Bra016575 | VII  | Bra008788 |           |           |
| DREB_A-4 | Bra023070 |   |           | 1R-MYB   | Bra040578 | VI   | Bra036326 |           |           |
| DREB_A-6 | Bra017879 |   |           | R2R3-MYB | Bra021483 | VI   | Bra036327 |           |           |
| ERF_B-3  | Bra024953 |   |           | 1R-MYB   | Bra008523 | VI   | Bra008553 |           |           |
| ERF_B-3  | Bra029319 |   |           | R2R3-MYB | Bra029113 | VI   | Bra036328 |           |           |
| ERF_B-6  | Bra008985 |   |           | 1R-MYB   | Bra012743 | VI   | Bra027596 |           |           |
| AP2      | Bra011782 |   |           | 1R-MYB   | Bra031041 | VI   | Bra033297 |           |           |
| DREB_A-6 | Bra031146 |   |           | 1R-MYB   | Bra015856 | VI   | Bra033296 |           |           |
| ERF_B-1  | Bra023684 |   |           | R2R3-MYB | Bra005818 | VI   | Bra010895 |           |           |
| ERF_B-1  | Bra019801 |   |           | R2R3-MYB | Bra008596 | VI   | Bra033302 |           |           |
| DREB_A-6 | Bra027697 |   |           | 1R-MYB   | Bra026253 | VI   | Bra033305 |           |           |
| ERF_B-6  | Bra026140 |   |           | R2R3-MYB | Bra013055 | VI   | Bra033306 |           |           |
| DREB_A-6 | Bra015634 |   |           | 1R-MYB   | Bra039470 | VI   | Bra033298 |           |           |
| DREB_A-6 | Bra024222 |   |           | R2R3-MYB | Bra024419 | VI   | Bra032615 |           |           |
| ERF_B-1  | Bra030095 |   |           | 1R-MYB   | Bra012919 | VI   | Bra033299 |           |           |
| ERF_B-1  | Bra030076 |   |           | R2R3-MYB | Bra037419 | VI   | Bra033303 |           |           |
| ERF_B-6  | Bra036536 |   |           | R2R3-MYB | Bra017813 | VI   | Bra033308 |           |           |
| ERF_B-6  | Bra036360 |   |           | R2R3-MYB | Bra020526 | VI   | Bra033300 |           |           |
| ERF_B-3  | Bra023746 |   |           | R2R3-MYB | Bra011785 | V    | Bra001000 |           |           |
| ERF_B-1  | Bra030094 |   |           | R2R3-MYB | Bra024368 | V    | Bra006257 |           |           |
| ERF_B-6  | Bra002262 |   |           | R2R3-MYB | Bra011749 | V    | Bra012470 |           |           |
| ERF_B-1  | Bra032901 |   |           | R2R3-MYB | Bra012337 | V    | Bra024733 |           |           |
| ERF_B-1  | Bra015266 |   |           | 1R-MYB   | Bra031060 | V    | Bra011090 |           |           |
| ERF_B-2  | Bra021543 |   |           | R2R3-MYB | Bra027771 | V    | Bra024152 |           |           |
| AP2      | Bra003178 |   |           | 1R-MYB   | Bra012665 | V    | Bra002802 |           |           |
| ERF      | Bra002510 |   |           | R2R3-MYB | Bra018772 | V    | Bra032910 |           |           |
| DREB_A-4 | Bra032630 |   |           | R2R3-MYB | Bra021708 | V    | Bra030099 |           |           |
| DREB_A-6 | Bra027736 |   |           | R2R3-MYB | Bra018223 | V    | Bra024197 |           |           |
| DREB_A-4 | Bra022573 |   |           | R2R3-MYB | Bra021382 | V    | Bra011034 |           |           |
| DREB_A-5 | Bra020162 |   |           | R2R3-MYB | Bra017685 | IV   | Bra033405 |           |           |
| ERF_B-6  | Bra020490 |   |           | 1R-MYB   | Bra029673 | IV   | Bra004575 |           |           |
| DREB_A-1 | Bra010460 |   |           | R2R3-MYB | Bra019368 | IV   | Bra004579 |           |           |
| ERF_B-6  | Bra024743 |   |           | 1R-MYB   | Bra018818 | IV   | Bra020326 |           |           |
| ERF_B-2  | Bra001640 |   |           | R2R3-MYB | Bra001472 | IV   | Bra020327 |           |           |
| ERF_B-6  | Bra025170 |   |           | R2R3-MYB | Bra028997 | IV   | Bra036314 |           |           |
| DREB_A-4 | Bra028291 |   |           | R2R3-MYB | Bra026281 | IV   | Bra036304 |           |           |
| AP2      | Bra011741 |   |           | R2R3-MYB | Bra016546 | IV   | Bra036305 |           |           |
| DREB_A-6 | Bra011833 |   |           | R2R3-MYB | Bra015029 | III  | Bra002605 |           |           |
| ERF_B-6  | Bra010429 |   |           | R2R3-MYB | Bra001917 | III  | Bra007254 |           |           |
| ERF_B-2  | Bra001541 |   |           | 1R-MYB   | Bra015890 | III  | Bra028486 |           |           |
| DREB_A-4 | Bra040092 |   |           | R2R3-MYB | Bra001404 | II   | Bra003237 |           |           |
| DREB_A-6 | Bra032724 |   |           | R2R3-MYB | Bra035893 | II   | Bra025701 |           |           |
| ERF_B-4  | Bra028703 |   |           | 1R-MYB   | Bra002790 | II   | Bra029571 |           |           |
| ERF_B-1  | Bra026942 |   |           | 1R-MYB   | Bra029111 | II   | Bra002857 |           |           |
| ERF_B-3  | Bra013310 |   |           | R2R3-MYB | Bra034057 | II   | Bra031518 |           |           |
| ERF_B-5  | Bra012352 |   |           | 1R-MYB   | Bra021864 | II   | Bra035412 |           |           |
| DREB_A-5 | Bra015660 |   |           | R2R3-MYB | Bra015912 | I    | Bra000192 |           |           |
| DREB_A-5 | Bra007974 |   |           | R2R3-MYB | Bra005139 | I    | Bra015108 |           |           |

|          |           |  |  |          |           |  |  |  |  |
|----------|-----------|--|--|----------|-----------|--|--|--|--|
| ERF_B-5  | Bra040839 |  |  | 1R-MYB   | Bra039650 |  |  |  |  |
| DREB_A-1 | Bra026963 |  |  | R2R3-MYB | Bra025575 |  |  |  |  |
| DREB_A-5 | Bra015882 |  |  | R2R3-MYB | Bra036145 |  |  |  |  |
| ERF_B-1  | Bra035792 |  |  | R2R3-MYB | Bra025589 |  |  |  |  |
| ERF_B-3  | Bra015478 |  |  | 1R-MYB   | Bra016037 |  |  |  |  |
| ERF_B-3  | Bra040158 |  |  | 1R-MYB   | Bra029978 |  |  |  |  |
| ERF_B-5  | Bra000736 |  |  | 1R-MYB   | Bra001311 |  |  |  |  |
| RAV      | Bra018868 |  |  | R2R3-MYB | Bra036048 |  |  |  |  |
| AP2      | Bra012139 |  |  | 1R-MYB   | Bra017487 |  |  |  |  |
| AP2      | Bra007066 |  |  | 1R-MYB   | Bra001643 |  |  |  |  |
| ERF_B-1  | Bra008793 |  |  | 1R-MYB   | Bra020390 |  |  |  |  |
| ERF_B-6  | Bra026770 |  |  | R2R3-MYB | Bra025678 |  |  |  |  |
| ERF_B-4  | Bra009272 |  |  | 1R-MYB   | Bra009699 |  |  |  |  |
| RAV      | Bra026917 |  |  | R2R3-MYB | Bra001005 |  |  |  |  |
| ERF_B-3  | Bra035919 |  |  | R2R3-MYB | Bra012482 |  |  |  |  |
| ERF_B-3  | Bra011529 |  |  | 3R-MYB   | Bra009597 |  |  |  |  |
| ERF_B-3  | Bra037630 |  |  | R2R3-MYB | Bra001323 |  |  |  |  |
| ERF      | Bra034895 |  |  | 1R-MYB   | Bra006915 |  |  |  |  |
| ERF_B-4  | Bra024325 |  |  | R2R3-MYB | Bra025410 |  |  |  |  |
| AP2      | Bra013978 |  |  | R2R3-MYB | Bra010085 |  |  |  |  |
| DREB_A-4 | Bra028009 |  |  | R2R3-MYB | Bra006370 |  |  |  |  |
| ERF_B-1  | Bra039658 |  |  | 1R-MYB   | Bra033291 |  |  |  |  |
| DREB_A-1 | Bra016763 |  |  | R2R3-MYB | Bra010593 |  |  |  |  |
| DREB_A-2 | Bra029889 |  |  | R2R3-MYB | Bra010021 |  |  |  |  |
| AP2      | Bra026082 |  |  | R2R3-MYB | Bra031008 |  |  |  |  |
| DREB_A-2 | Bra009112 |  |  | 1R-MYB   | Bra036035 |  |  |  |  |
| RAV      | Bra011002 |  |  | R2R3-MYB | Bra017218 |  |  |  |  |
| AP2      | Bra020444 |  |  | R2R3-MYB | Bra036588 |  |  |  |  |
| AP2      | Bra035137 |  |  | 1R-MYB   | Bra036679 |  |  |  |  |
| AP2      | Bra009026 |  |  | R2R3-MYB | Bra019154 |  |  |  |  |
| ERF_B-6  | Bra006518 |  |  | 1R-MYB   | Bra007957 |  |  |  |  |
| DREB_A-5 | Bra016400 |  |  | R2R3-MYB | Bra003995 |  |  |  |  |
| DREB_A-1 | Bra028290 |  |  | R2R3-MYB | Bra015992 |  |  |  |  |
| ERF_B-1  | Bra010880 |  |  | R2R3-MYB | Bra026720 |  |  |  |  |
| ERF      | Bra023921 |  |  | R2R3-MYB | Bra002938 |  |  |  |  |
| ERF_B-3  | Bra017656 |  |  | 1R-MYB   | Bra028780 |  |  |  |  |
| DREB_A-4 | Bra005314 |  |  | 1R-MYB   | Bra029856 |  |  |  |  |
| AP2      | Bra017809 |  |  | 1R-MYB   | Bra004441 |  |  |  |  |
| RAV      | Bra030476 |  |  | R2R3-MYB | Bra028550 |  |  |  |  |
| ERF_B-2  | Bra021200 |  |  | R2R3-MYB | Bra006055 |  |  |  |  |
| DREB_A-1 | Bra027612 |  |  | 1R-MYB   | Bra002610 |  |  |  |  |
| DREB_A-4 | Bra003924 |  |  | R2R3-MYB | Bra029696 |  |  |  |  |
| DREB_A-5 | Bra032173 |  |  | 1R-MYB   | Bra005751 |  |  |  |  |
| ERF_B-5  | Bra016367 |  |  | R2R3-MYB | Bra020892 |  |  |  |  |
| ERF_B-1  | Bra021594 |  |  | R2R3-MYB | Bra028593 |  |  |  |  |
| DREB_A-4 | Bra004878 |  |  | 1R-MYB   | Bra022127 |  |  |  |  |
| ERF_B-4  | Bra021871 |  |  | R2R3-MYB | Bra015899 |  |  |  |  |
| ERF_B-3  | Bra022115 |  |  | R2R3-MYB | Bra033948 |  |  |  |  |
| ERF_B-1  | Bra002168 |  |  | R2R3-MYB | Bra003619 |  |  |  |  |
| ERF_B-3  | Bra035732 |  |  | R2R3-MYB | Bra012961 |  |  |  |  |
| ERF_B-2  | Bra027355 |  |  | 1R-MYB   | Bra009591 |  |  |  |  |
| ERF_B-5  | Bra026295 |  |  | R2R3-MYB | Bra008522 |  |  |  |  |
| ERF_B-1  | Bra038107 |  |  | R2R3-MYB | Bra006249 |  |  |  |  |
| ERF_B-5  | Bra003462 |  |  | 1R-MYB   | Bra009432 |  |  |  |  |
| DREB_A-2 | Bra005852 |  |  | 1R-MYB   | Bra029778 |  |  |  |  |
| DREB_A-3 | Bra004978 |  |  | 1R-MYB   | Bra031952 |  |  |  |  |
| DREB_A-4 | Bra027616 |  |  | R2R3-MYB | Bra035097 |  |  |  |  |
| RAV      | Bra019821 |  |  | 1R-MYB   | Bra037388 |  |  |  |  |
| ERF_B-3  | Bra022832 |  |  | R2R3-MYB | Bra017138 |  |  |  |  |
| DREB_A-3 | Bra000178 |  |  | 1R-MYB   | Bra041027 |  |  |  |  |
| DREB_A-4 | Bra027614 |  |  | 1R-MYB   | Bra003969 |  |  |  |  |
| DREB_A-4 | Bra036552 |  |  | R2R3-MYB | Bra015911 |  |  |  |  |
| ERF_B-2  | Bra016063 |  |  | 1R-MYB   | Bra011691 |  |  |  |  |
| DREB_A-5 | Bra012345 |  |  | R2R3-MYB | Bra035547 |  |  |  |  |
| DREB_A-6 | Bra031371 |  |  | R2R3-MYB | Bra034173 |  |  |  |  |
| DREB_A-1 | Bra010461 |  |  | R2R3-MYB | Bra025300 |  |  |  |  |
| DREB_A-2 | Bra002159 |  |  | R2R3-MYB | Bra006296 |  |  |  |  |
| ERF_B-4  | Bra005932 |  |  | R2R3-MYB | Bra021791 |  |  |  |  |
| ERF_B-1  | Bra026949 |  |  | R2R3-MYB | Bra025666 |  |  |  |  |
| DREB_A-2 | Bra003752 |  |  | 1R-MYB   | Bra023610 |  |  |  |  |
| DREB_A-4 | Bra007975 |  |  | 1R-MYB   | Bra016893 |  |  |  |  |
| ERF_B-3  | Bra012938 |  |  | R2R3-MYB | Bra015939 |  |  |  |  |
| ERF_B-3  | Bra034624 |  |  | R2R3-MYB | Bra010736 |  |  |  |  |
| ERF_B-3  | Bra021049 |  |  | R2R3-MYB | Bra018267 |  |  |  |  |
| ERF_B-5  | Bra029079 |  |  | R2R3-MYB | Bra039067 |  |  |  |  |
| DREB_A-5 | Bra012140 |  |  | R2R3-MYB | Bra029349 |  |  |  |  |
| DREB_A-4 | Bra011383 |  |  | R2R3-MYB | Bra013526 |  |  |  |  |

|          |           |  |  |          |           |  |  |  |  |
|----------|-----------|--|--|----------|-----------|--|--|--|--|
| DREB_A-5 | Bra002377 |  |  | 1R-MYB   | Bra003870 |  |  |  |  |
| ERF_B-6  | Bra019087 |  |  | 1R-MYB   | Bra030992 |  |  |  |  |
| DREB_A-5 | Bra031069 |  |  | R2R3-MYB | Bra002448 |  |  |  |  |
| DREB_A-2 | Bra001386 |  |  | 1R-MYB   | Bra039617 |  |  |  |  |
| ERF_B-5  | Bra004548 |  |  | R2R3-MYB | Bra000680 |  |  |  |  |
| DREB_A-4 | Bra000366 |  |  | R2R3-MYB | Bra025652 |  |  |  |  |
| ERF_B-5  | Bra013730 |  |  | 1R-MYB   | Bra005230 |  |  |  |  |
| DREB_A-4 | Bra023332 |  |  | 1R-MYB   | Bra024760 |  |  |  |  |
|          |           |  |  | R2R3-MYB | Bra030783 |  |  |  |  |
|          |           |  |  | R2R3-MYB | Bra005234 |  |  |  |  |
|          |           |  |  | R2R3-MYB | Bra039142 |  |  |  |  |
|          |           |  |  | R2R3-MYB | Bra016553 |  |  |  |  |
|          |           |  |  | 1R-MYB   | Bra022637 |  |  |  |  |
|          |           |  |  | R2R3-MYB | Bra023515 |  |  |  |  |
|          |           |  |  | R2R3-MYB | Bra027423 |  |  |  |  |
|          |           |  |  | 1R-MYB   | Bra037365 |  |  |  |  |
|          |           |  |  | R2R3-MYB | Bra004473 |  |  |  |  |
|          |           |  |  | R2R3-MYB | Bra002533 |  |  |  |  |
|          |           |  |  | 1R-MYB   | Bra009562 |  |  |  |  |
|          |           |  |  | R2R3-MYB | Bra020624 |  |  |  |  |
|          |           |  |  | 1R-MYB   | Bra025681 |  |  |  |  |
|          |           |  |  | R2R3-MYB | Bra008149 |  |  |  |  |
|          |           |  |  | R2R3-MYB | Bra014929 |  |  |  |  |
|          |           |  |  | 4R-MYB   | Bra022280 |  |  |  |  |
|          |           |  |  | 1R-MYB   | Bra029762 |  |  |  |  |
|          |           |  |  | 3R-MYB   | Bra034067 |  |  |  |  |
|          |           |  |  | R2R3-MYB | Bra037828 |  |  |  |  |
|          |           |  |  | 3R-MYB   | Bra013415 |  |  |  |  |
|          |           |  |  | R2R3-MYB | Bra014446 |  |  |  |  |
|          |           |  |  | 1R-MYB   | Bra029320 |  |  |  |  |
|          |           |  |  | R2R3-MYB | Bra031669 |  |  |  |  |
|          |           |  |  | 1R-MYB   | Bra020584 |  |  |  |  |
|          |           |  |  | R2R3-MYB | Bra021515 |  |  |  |  |
|          |           |  |  | 1R-MYB   | Bra034074 |  |  |  |  |
|          |           |  |  | 1R-MYB   | Bra012623 |  |  |  |  |
|          |           |  |  | R2R3-MYB | Bra005006 |  |  |  |  |
|          |           |  |  | R2R3-MYB | Bra039763 |  |  |  |  |
|          |           |  |  | R2R3-MYB | Bra025337 |  |  |  |  |
|          |           |  |  | 1R-MYB   | Bra006741 |  |  |  |  |
|          |           |  |  | R2R3-MYB | Bra001202 |  |  |  |  |
|          |           |  |  | R2R3-MYB | Bra039065 |  |  |  |  |
|          |           |  |  | 1R-MYB   | Bra007536 |  |  |  |  |
|          |           |  |  | R2R3-MYB | Bra028654 |  |  |  |  |
|          |           |  |  | 1R-MYB   | Bra009910 |  |  |  |  |
|          |           |  |  | R2R3-MYB | Bra006422 |  |  |  |  |
|          |           |  |  | R2R3-MYB | Bra035929 |  |  |  |  |
|          |           |  |  | 1R-MYB   | Bra007506 |  |  |  |  |
|          |           |  |  | R2R3-MYB | Bra005949 |  |  |  |  |
|          |           |  |  | R2R3-MYB | Bra040181 |  |  |  |  |
|          |           |  |  | 1R-MYB   | Bra008563 |  |  |  |  |
|          |           |  |  | R2R3-MYB | Bra033067 |  |  |  |  |
|          |           |  |  | 1R-MYB   | Bra003117 |  |  |  |  |
|          |           |  |  | 1R-MYB   | Bra009044 |  |  |  |  |
|          |           |  |  | 1R-MYB   | Bra035457 |  |  |  |  |
|          |           |  |  | 1R-MYB   | Bra006394 |  |  |  |  |
|          |           |  |  | R2R3-MYB | Bra020428 |  |  |  |  |
|          |           |  |  | 1R-MYB   | Bra022183 |  |  |  |  |
|          |           |  |  | R2R3-MYB | Bra002847 |  |  |  |  |
|          |           |  |  | R2R3-MYB | Bra029311 |  |  |  |  |
|          |           |  |  | 1R-MYB   | Bra031282 |  |  |  |  |
|          |           |  |  | R2R3-MYB | Bra009134 |  |  |  |  |
|          |           |  |  | R2R3-MYB | Bra029350 |  |  |  |  |
|          |           |  |  | R2R3-MYB | Bra018598 |  |  |  |  |
|          |           |  |  | R2R3-MYB | Bra008160 |  |  |  |  |
|          |           |  |  | R2R3-MYB | Bra015481 |  |  |  |  |
|          |           |  |  | R2R3-MYB | Bra007588 |  |  |  |  |
|          |           |  |  | R2R3-MYB | Bra035604 |  |  |  |  |
|          |           |  |  | 1R-MYB   | Bra030894 |  |  |  |  |
|          |           |  |  | 1R-MYB   | Bra012721 |  |  |  |  |
|          |           |  |  | 1R-MYB   | Bra006853 |  |  |  |  |
|          |           |  |  | R2R3-MYB | Bra020016 |  |  |  |  |
|          |           |  |  | R2R3-MYB | Bra004041 |  |  |  |  |
|          |           |  |  | R2R3-MYB | Bra008764 |  |  |  |  |

The identified five families of TFs in *B. oleracea*

| Subfamily | BoAP2/EREBP  | Subfami | BobZIP       | Subfamily | BoMYB        | Subfamily | BoNAC        | Subfamily | BoWRKY        |
|-----------|--------------|---------|--------------|-----------|--------------|-----------|--------------|-----------|---------------|
| DREB_A-5  | Bo1g004940.1 | XI      | Bo3g073080.1 | R2R3-MYB  | Bo8g049720.1 | XVI       | Bo1g005810.1 | GroupII-d | Bo00834s070.1 |
| ERF_B-3   | Bo8g114710.1 | XI      | Bo5g115300.1 | 1R-MYB    | Bo8g117860.1 | XVI       | Bo7g117820.1 | GroupIII  | Bo00913s010.1 |







|          |               |  |  |          |               |     |               |  |  |
|----------|---------------|--|--|----------|---------------|-----|---------------|--|--|
| DREB_A-1 | Bo3g024240.1  |  |  | R2R3-MYB | Bo3g107600.1  | IV  | Bo5g002870.1  |  |  |
| ERF_B-3  | Bo7g040820.1  |  |  | R2R3-MYB | Bo5g133210.1  | IV  | Bo9g004070.1  |  |  |
| ERF_B-1  | Bo8g107780.1  |  |  | R2R3-MYB | Bo9g010860.1  | IV  | Bo9g061230.1  |  |  |
| ERF_B-1  | Bo2g095830.1  |  |  | 1R-MYB   | Bo5g034720.1  | IV  | Bo00853s060.1 |  |  |
| ERF_B-1  | Bo5g016400.1  |  |  | R2R3-MYB | Bo00835s060.1 | IV  | Bo9g004110.1  |  |  |
| ERF_B-5  | Bo4g009400.1  |  |  | 1R-MYB   | Bo3g054440.1  | IV  | Bo9g004100.1  |  |  |
| DREB_A-4 | Bo6g094210.1  |  |  | 1R-MYB   | Bo5g131980.1  | IV  | Bo9g004090.1  |  |  |
| DREB_A-4 | Bo7g104770.1  |  |  | 1R-MYB   | Bo3g168900.1  | IV  | Bo6g119080.1  |  |  |
| DREB_A-2 | Bo9g155940.1  |  |  | 1R-MYB   | Bo8g043610.1  | IV  | Bo3g122200.1  |  |  |
| ERF_B-3  | Bo7g098860.1  |  |  | R2R3-MYB | Bo3g091600.1  | IV  | Bo3g123480.1  |  |  |
| DREB_A-6 | Bo9g030900.1  |  |  | R2R3-MYB | Bo9g176900.1  | IV  | Bo9g148540.1  |  |  |
| ERF_B-4  | Bo2g161710.1  |  |  | 1R-MYB   | Bo9g178980.1  | IV  | Bo2g023870.1  |  |  |
| ERF_B-1  | Bo3g143080.1  |  |  | R2R3-MYB | Bo3g010230.1  | IV  | Bo3g016870.1  |  |  |
| DREB_A-4 | Bo2g072910.1  |  |  | 1R-MYB   | Bo4g031010.1  | IV  | Bo9g097190.1  |  |  |
| DREB_A-1 | Bo01335s010.1 |  |  | 1R-MYB   | Bo7g003580.1  | IV  | Bo4g112990.1  |  |  |
| ERF_B-3  | Bo14558s010.1 |  |  | 1R-MYB   | Bo3g094110.1  | IV  | Bo5g002830.1  |  |  |
| ERF      | Bo3g035770.1  |  |  | R2R3-MYB | Bo4g101470.1  | IV  | Bo5g002860.1  |  |  |
| ERF_B-2  | Bo6g115850.1  |  |  | R2R3-MYB | Bo9g076410.1  | IV  | Bo1g093090.1  |  |  |
| ERF_B-3  | Bo9g014660.1  |  |  | R2R3-MYB | Bo3g062160.1  | IV  | Bo3g081220.1  |  |  |
| ERF_B-6  | Bo5g043190.1  |  |  | R2R3-MYB | Bo9g147050.1  | IV  | Bo5g002810.1  |  |  |
| ERF_B-2  | Bo3g068510.1  |  |  | 1R-MYB   | Bo4g021680.1  | IV  | Bo5g002850.1  |  |  |
| ERF_B-4  | Bo9g167820.1  |  |  | 1R-MYB   | Bo8g068210.1  | IV  | Bo3g143160.1  |  |  |
| ERF_B-1  | Bo3g185040.1  |  |  | R2R3-MYB | Bo2g146540.1  | IV  | Bo5g002960.1  |  |  |
| DREB_A-2 | Bo6g086320.1  |  |  | 1R-MYB   | Bo3g002620.1  | IV  | Bo5g002890.1  |  |  |
| ERF_B-5  | Bo7g056530.1  |  |  | R2R3-MYB | Bo8g104600.1  | IV  | Bo2g070830.1  |  |  |
| DREB_A-1 | Bo9g104770.1  |  |  | 1R-MYB   | Bo9g019040.1  | IV  | Bo5g002900.1  |  |  |
| ERF_B-5  | Bo2g045930.1  |  |  | 1R-MYB   | Bo9g052030.1  | IV  | Bo8g117570.1  |  |  |
| ERF_B-1  | Bo5g054550.1  |  |  | R2R3-MYB | Bo2g161590.1  | IV  | Bo8g117560.1  |  |  |
| ERF_B-1  | Bo5g055840.1  |  |  | R2R3-MYB | Bo1g102190.1  | IV  | Bo5g002880.1  |  |  |
| ERF_B-3  | Bo9g100030.1  |  |  | R2R3-MYB | Bo4g176020.1  | IV  | Bo5g002930.1  |  |  |
| ERF_B-3  | Bo1g017580.1  |  |  | R2R3-MYB | Bo6g118860.1  | IV  | Bo5g002910.1  |  |  |
| ERF_B-1  | Bo6g031240.1  |  |  | R2R3-MYB | Bo7g117140.1  | IV  | Bo5g002950.1  |  |  |
| ERF_B-3  | Bo2g161480.1  |  |  | R2R3-MYB | Bo9g014980.1  | III | Bo1g091580.1  |  |  |
| DREB_A-5 | Bo9g149820.1  |  |  | R2R3-MYB | Bo7g092680.1  | III | Bo1g091800.1  |  |  |
| DREB_A-3 | Bo4g025410.1  |  |  | R2R3-MYB | Bo5g136570.1  | III | Bo4g084880.1  |  |  |
| DREB_A-4 | Bo4g158810.1  |  |  | R2R3-MYB | Bo5g007320.1  | III | Bo9g122180.1  |  |  |
| DREB_A-6 | Bo1g051230.1  |  |  | R2R3-MYB | Bo1g004900.1  | III | Bo9g122170.1  |  |  |
| ERF_B-3  | Bo4g052480.1  |  |  | 1R-MYB   | Bo5g139340.1  | III | Bo9g123430.1  |  |  |
| ERF      | Bo3g040110.1  |  |  | R2R3-MYB | Bo7g095130.1  | II  | Bo3g055070.1  |  |  |
| ERF_B-3  | Bo7g077410.1  |  |  | 1R-MYB   | Bo2g097680.1  | II  | Bo1g037810.1  |  |  |
| ERF      | Bo9g160260.1  |  |  | R2R3-MYB | Bo4g198510.1  | II  | Bo5g043100.1  |  |  |
| ERF_B-4  | Bo2g166380.1  |  |  | 1R-MYB   | Bo1g144410.1  | II  | Bo7g052860.1  |  |  |
| DREB_A-1 | Bo5g016750.1  |  |  | R2R3-MYB | Bo7g063830.1  | II  | Bo9g126190.1  |  |  |
| ERF      | Bo6g068410.1  |  |  | R2R3-MYB | Bo2g080900.1  | II  | Bo7g113660.1  |  |  |
| ERF_B-3  | Bo1g017590.1  |  |  | R2R3-MYB | Bo4g140330.1  | II  | Bo1g016630.1  |  |  |
| DREB_A-5 | Bo7g118430.1  |  |  | R2R3-MYB | Bo9g009020.1  | II  | Bo7g113170.1  |  |  |
| ERF_B-1  | Bo7g048420.1  |  |  | R2R3-MYB | Bo3g012180.1  | II  | Bo1g017410.1  |  |  |
| ERF      | Bo2g025090.1  |  |  | R2R3-MYB | Bo8g067590.1  | II  | Bo5g055990.1  |  |  |
| AP2      | Bo6g067950.1  |  |  | R2R3-MYB | Bo8g067910.1  | II  | Bo7g047040.1  |  |  |
| DREB_A-5 | Bo6g121400.1  |  |  | 1R-MYB   | Bo5g002430.1  | I   | Bo7g030700.1  |  |  |
| DREB_A-5 | Bo6g086740.1  |  |  | R2R3-MYB | Bo9g018910.1  | I   | Bo1g071020.1  |  |  |
| AP2      | Bo9g160240.1  |  |  | R2R3-MYB | Bo3g021790.1  | I   | Bo6g072200.1  |  |  |
| ERF_B-2  | Bo6g091540.1  |  |  | 1R-MYB   | Bo7g105690.1  | I   | Bo6g064960.1  |  |  |
| DREB_A-4 | Bo4g034600.1  |  |  | R2R3-MYB | Bo3g031390.1  | I   | Bo4g140840.1  |  |  |
| DREB_A-1 | Bo7g110320.1  |  |  | R2R3-MYB | Bo3g026690.1  |     |               |  |  |
| ERF_B-3  | Bo4g195220.1  |  |  | R2R3-MYB | Bo1g098860.1  |     |               |  |  |
| DREB_A-2 | Bo3g013160.1  |  |  | R2R3-MYB | Bo4g140210.1  |     |               |  |  |
| ERF_B-5  | Bo1g037170.1  |  |  | R2R3-MYB | Bo9g161810.1  |     |               |  |  |
| ERF_B-1  | Bo1g108970.1  |  |  | R2R3-MYB | Bo9g159830.1  |     |               |  |  |
| ERF_B-5  | Bo8g053000.1  |  |  | R2R3-MYB | Bo5g009290.1  |     |               |  |  |
| DREB_A-4 | Bo8g027240.1  |  |  | 1R-MYB   | Bo6g094990.1  |     |               |  |  |
| DREB_A-4 | Bo6g077080.1  |  |  | R2R3-MYB | Bo6g106730.1  |     |               |  |  |
| DREB_A-4 | Bo3g023490.1  |  |  | R2R3-MYB | Bo5g139830.1  |     |               |  |  |
| ERF_B-3  | Bo4g176080.1  |  |  | 3R-MYB   | Bo1g021790.1  |     |               |  |  |
| ERF_B-1  | Bo3g182770.1  |  |  | R2R3-MYB | Bo7g119670.1  |     |               |  |  |
| ERF_B-6  | Bo7g111140.1  |  |  | R2R3-MYB | Bo2g010970.1  |     |               |  |  |
| ERF_B-1  | Bo2g122260.1  |  |  | R2R3-MYB | Bo9g169270.1  |     |               |  |  |
| ERF_B-1  | Bo7g050300.1  |  |  | 1R-MYB   | Bo9g134990.1  |     |               |  |  |
| ERF_B-1  | Bo3g074840.1  |  |  | R2R3-MYB | Bo3g083130.1  |     |               |  |  |
| DREB_A-5 | Bo7g059990.1  |  |  | 1R-MYB   | Bo1g051550.1  |     |               |  |  |
| AP2      | Bo2g032400.1  |  |  | 1R-MYB   | Bo7g099090.1  |     |               |  |  |
| DREB_A-4 | Bo4g036220.1  |  |  | 1R-MYB   | Bo7g093690.1  |     |               |  |  |
| DREB_A-4 | Bo5g126280.1  |  |  | 1R-MYB   | Bo3g001090.1  |     |               |  |  |
| ERF_B-6  | Bo9g171490.1  |  |  | R2R3-MYB | Bo6g122640.1  |     |               |  |  |
| ERF_B-4  | Bo3g109240.1  |  |  | R2R3-MYB | Bo9g165670.1  |     |               |  |  |
| ERF_B-6  | Bo4g157530.1  |  |  | R2R3-MYB | Bo3g004500.1  |     |               |  |  |
| ERF_B-1  | Bo5g004090.1  |  |  | R2R3-MYB | Bo9g004210.1  |     |               |  |  |

|          |              |  |  |          |               |  |  |  |  |
|----------|--------------|--|--|----------|---------------|--|--|--|--|
| ERF_B-3  | Bo5g007280.1 |  |  | R2R3-MYB | Bo00685s060.1 |  |  |  |  |
| ERF_B-5  | Bo8g071630.1 |  |  | R2R3-MYB | Bo9g123440.1  |  |  |  |  |
| DREB_A-5 | Bo8g071150.1 |  |  | 1R-MYB   | Bo3g154100.1  |  |  |  |  |
| ERF_B-1  | Bo3g140080.1 |  |  | R2R3-MYB | Bo3g060620.1  |  |  |  |  |
| ERF_B-2  | Bo3g066010.1 |  |  | 1R-MYB   | Bo3g002160.1  |  |  |  |  |
| DREB_A-4 | Bo8g064940.1 |  |  | 1R-MYB   | Bo1g142610.1  |  |  |  |  |
| ERF_B-1  | Bo9g154770.1 |  |  | 1R-MYB   | Bo2g149310.1  |  |  |  |  |
| AP2      | Bo1g004960.1 |  |  | R2R3-MYB | Bo9g008700.1  |  |  |  |  |
| DREB_A-6 | Bo8g054130.1 |  |  | R2R3-MYB | Bo4g031070.1  |  |  |  |  |
| DREB_A-4 | Bo3g037480.1 |  |  | 1R-MYB   | Bo9g135730.1  |  |  |  |  |
| DREB_A-2 | Bo2g016490.1 |  |  | 1R-MYB   | Bo2g146330.1  |  |  |  |  |
| ERF_B-2  | Bo1g123160.1 |  |  | 3R-MYB   | Bo3g179620.1  |  |  |  |  |
| DREB_A-4 | Bo7g115860.1 |  |  | R2R3-MYB | Bo00954s080.1 |  |  |  |  |
| DREB_A-1 | Bo8g050740.1 |  |  | R2R3-MYB | Bo6g044070.1  |  |  |  |  |
| DREB_A-2 | Bo6g073020.1 |  |  | 1R-MYB   | Bo5g025310.1  |  |  |  |  |
| AP2      | Bo2g009900.1 |  |  | 1R-MYB   | Bo1g003590.1  |  |  |  |  |
| AP2      | Bo2g076920.1 |  |  | R2R3-MYB | Bo3g081880.1  |  |  |  |  |
| ERF_B-6  | Bo7g096180.1 |  |  | 1R-MYB   | Bo2g070770.1  |  |  |  |  |
| DREB_A-5 | Bo6g119120.1 |  |  | R2R3-MYB | Bo4g140220.1  |  |  |  |  |
| ERF_B-3  | Bo7g077390.1 |  |  | R2R3-MYB | Bo3g055110.1  |  |  |  |  |
| DREB_A-4 | Bo4g195280.1 |  |  | 1R-MYB   | Bo3g019630.1  |  |  |  |  |
| ERF_B-4  | Bo2g011200.1 |  |  | R2R3-MYB | Bo7g111870.1  |  |  |  |  |
| AP2      | Bo9g171990.1 |  |  | 1R-MYB   | Bo8g067280.1  |  |  |  |  |
| DREB_A-4 | Bo8g117810.1 |  |  | R2R3-MYB | Bo2g080540.1  |  |  |  |  |
| RAV      | Bo3g138550.1 |  |  | R2R3-MYB | Bo9g014380.1  |  |  |  |  |
| ERF_B-1  | Bo9g166320.1 |  |  | R2R3-MYB | Bo8g030520.1  |  |  |  |  |
| ERF_B-5  | Bo1g051080.1 |  |  | R2R3-MYB | Bo5g156410.1  |  |  |  |  |
| ERF_B-6  | Bo8g051400.1 |  |  | 1R-MYB   | Bo3g023120.1  |  |  |  |  |
| ERF_B-4  | Bo3g009120.1 |  |  | 1R-MYB   | Bo6g116150.1  |  |  |  |  |
| DREB_A-5 | Bo4g151460.1 |  |  | 1R-MYB   | Bo4g006930.1  |  |  |  |  |
| ERF_B-4  | Bo3g100930.1 |  |  | 3R-MYB   | Bo3g062020.1  |  |  |  |  |
| DREB_A-4 | Bo9g104780.1 |  |  | R2R3-MYB | Bo7g107420.1  |  |  |  |  |
| DREB_A-4 | Bo7g095710.1 |  |  | R2R3-MYB | Bo1g141120.1  |  |  |  |  |
| DREB_A-4 | Bo4g186300.1 |  |  | R2R3-MYB | Bo7g108060.1  |  |  |  |  |
| DREB_A-5 | Bo8g102870.1 |  |  | R2R3-MYB | Bo6g109070.1  |  |  |  |  |
| ERF_B-6  | Bo9g011380.1 |  |  | 3R-MYB   | Bo1g010040.1  |  |  |  |  |
| DREB_A-4 | Bo9g170060.1 |  |  | R2R3-MYB | Bo7g087050.1  |  |  |  |  |
| ERF_B-1  | Bo2g016580.1 |  |  | R2R3-MYB | Bo9g133340.1  |  |  |  |  |
| ERF_B-6  | Bo7g082250.1 |  |  | 1R-MYB   | Bo9g028250.1  |  |  |  |  |
| DREB_A-4 | Bo9g011210.1 |  |  | 1R-MYB   | Bo3g022870.1  |  |  |  |  |
| AP2      | Bo3g099090.1 |  |  | R2R3-MYB | Bo5g025570.1  |  |  |  |  |
| ERF_B-3  | Bo9g175610.1 |  |  | 1R-MYB   | Bo3g039720.1  |  |  |  |  |
| ERF_B-6  | Bo7g111110.1 |  |  | 1R-MYB   | Bo1g002450.1  |  |  |  |  |
| ERF      | Bo8g033910.1 |  |  | 1R-MYB   | Bo1g153240.1  |  |  |  |  |
| ERF_B-4  | Bo4g043530.1 |  |  | 1R-MYB   | Bo3g096520.1  |  |  |  |  |
| ERF_B-3  | Bo8g115580.1 |  |  | 1R-MYB   | Bo24301s010.1 |  |  |  |  |
| ERF_B-6  | Bo3g013830.1 |  |  | R2R3-MYB | Bo4g178040.1  |  |  |  |  |
| ERF_B-3  | Bo9g069400.1 |  |  | 1R-MYB   | Bo5g021890.1  |  |  |  |  |
| DREB_A-5 | Bo8g019370.1 |  |  | R2R3-MYB | Bo9g166000.1  |  |  |  |  |
|          |              |  |  | R2R3-MYB | Bo7g098110.1  |  |  |  |  |
|          |              |  |  | R2R3-MYB | Bo3g032160.1  |  |  |  |  |
|          |              |  |  | R2R3-MYB | Bo6g118350.1  |  |  |  |  |
|          |              |  |  | R2R3-MYB | Bo6g097180.1  |  |  |  |  |
|          |              |  |  | R2R3-MYB | Bo7g091360.1  |  |  |  |  |
|          |              |  |  | R2R3-MYB | Bo1g138940.1  |  |  |  |  |
|          |              |  |  | 1R-MYB   | Bo01274s030.1 |  |  |  |  |
|          |              |  |  | R2R3-MYB | Bo7g099180.1  |  |  |  |  |
|          |              |  |  | 1R-MYB   | Bo9g003580.1  |  |  |  |  |
|          |              |  |  | R2R3-MYB | Bo7g057770.1  |  |  |  |  |
|          |              |  |  | R2R3-MYB | Bo5g155050.1  |  |  |  |  |
|          |              |  |  | 1R-MYB   | Bo7g085920.1  |  |  |  |  |
|          |              |  |  | R2R3-MYB | Bo6g077030.1  |  |  |  |  |
|          |              |  |  | 1R-MYB   | Bo9g110930.1  |  |  |  |  |
|          |              |  |  | R2R3-MYB | Bo2g009130.1  |  |  |  |  |
|          |              |  |  | R2R3-MYB | Bo4g140000.1  |  |  |  |  |
|          |              |  |  | 1R-MYB   | Bo03161s010.1 |  |  |  |  |
|          |              |  |  | 1R-MYB   | Bo4g101460.1  |  |  |  |  |
|          |              |  |  | R2R3-MYB | Bo2g151810.1  |  |  |  |  |
|          |              |  |  | R2R3-MYB | Bo3g012780.1  |  |  |  |  |
|          |              |  |  | R2R3-MYB | Bo6g086910.1  |  |  |  |  |
|          |              |  |  | 1R-MYB   | Bo5g126180.1  |  |  |  |  |
|          |              |  |  | R2R3-MYB | Bo2g164160.1  |  |  |  |  |
|          |              |  |  | R2R3-MYB | Bo4g186460.1  |  |  |  |  |
|          |              |  |  | R2R3-MYB | Bo6g095400.1  |  |  |  |  |
|          |              |  |  | R2R3-MYB | Bo8g091080.1  |  |  |  |  |
|          |              |  |  | R2R3-MYB | Bo2g002350.1  |  |  |  |  |
|          |              |  |  | R2R3-MYB | Bo3g064180.1  |  |  |  |  |

|  |  |  |  |          |               |  |  |  |  |
|--|--|--|--|----------|---------------|--|--|--|--|
|  |  |  |  | R2R3-MYB | Bo4g140150.1  |  |  |  |  |
|  |  |  |  | 1R-MYB   | Bo4g030640.1  |  |  |  |  |
|  |  |  |  | 1R-MYB   | Bo8g080840.1  |  |  |  |  |
|  |  |  |  | 1R-MYB   | Bo5g023860.1  |  |  |  |  |
|  |  |  |  | 1R-MYB   | Bo3g039260.1  |  |  |  |  |
|  |  |  |  | R2R3-MYB | Bo8g077360.1  |  |  |  |  |
|  |  |  |  | R2R3-MYB | Bo4g176030.1  |  |  |  |  |
|  |  |  |  | R2R3-MYB | Bo6g077600.1  |  |  |  |  |
|  |  |  |  | R2R3-MYB | Bo4g029810.1  |  |  |  |  |
|  |  |  |  | 1R-MYB   | Bo3g018460.1  |  |  |  |  |
|  |  |  |  | R2R3-MYB | Bo9g029530.1  |  |  |  |  |
|  |  |  |  | 1R-MYB   | Bo1g005570.1  |  |  |  |  |
|  |  |  |  | R2R3-MYB | Bo8g058040.1  |  |  |  |  |
|  |  |  |  | R2R3-MYB | Bo8g079430.1  |  |  |  |  |
|  |  |  |  | 1R-MYB   | Bo6g091360.1  |  |  |  |  |
|  |  |  |  | 1R-MYB   | Bo1g087910.1  |  |  |  |  |
|  |  |  |  | R2R3-MYB | Bo2g156300.1  |  |  |  |  |
|  |  |  |  | R2R3-MYB | Bo7g088650.1  |  |  |  |  |
|  |  |  |  | 1R-MYB   | Bo2g098940.1  |  |  |  |  |
|  |  |  |  | 1R-MYB   | Bo3g017760.1  |  |  |  |  |
|  |  |  |  | 1R-MYB   | Bo7g105100.1  |  |  |  |  |
|  |  |  |  | R2R3-MYB | Bo5g025790.1  |  |  |  |  |
|  |  |  |  | 1R-MYB   | Bo5g137250.1  |  |  |  |  |
|  |  |  |  | R2R3-MYB | Bo5g136680.1  |  |  |  |  |
|  |  |  |  | 4R-MYB   | Bo00828s010.1 |  |  |  |  |
|  |  |  |  | 3R-MYB   | Bo8g104210.1  |  |  |  |  |
|  |  |  |  | 1R-MYB   | Bo8g084780.1  |  |  |  |  |
|  |  |  |  | 1R-MYB   | Bo2g132340.1  |  |  |  |  |
|  |  |  |  | 1R-MYB   | Bo1g081300.1  |  |  |  |  |
|  |  |  |  | R2R3-MYB | Bo2g013190.1  |  |  |  |  |
|  |  |  |  | R2R3-MYB | Bo7g040780.1  |  |  |  |  |
|  |  |  |  | R2R3-MYB | Bo8g068030.1  |  |  |  |  |
|  |  |  |  | 1R-MYB   | Bo5g077530.1  |  |  |  |  |
|  |  |  |  | R2R3-MYB | Bo3g061630.1  |  |  |  |  |
|  |  |  |  | R2R3-MYB | Bo7g110400.1  |  |  |  |  |
|  |  |  |  | 1R-MYB   | Bo4g106310.1  |  |  |  |  |
|  |  |  |  | R2R3-MYB | Bo7g105430.1  |  |  |  |  |
|  |  |  |  | R2R3-MYB | Bo9g119060.1  |  |  |  |  |
|  |  |  |  | R2R3-MYB | Bo1g157620.1  |  |  |  |  |
|  |  |  |  | R2R3-MYB | Bo4g076940.1  |  |  |  |  |
|  |  |  |  | R2R3-MYB | Bo3g130340.1  |  |  |  |  |
|  |  |  |  | 1R-MYB   | Bo5g146770.1  |  |  |  |  |
|  |  |  |  | 1R-MYB   | Bo2g046050.1  |  |  |  |  |
|  |  |  |  | R2R3-MYB | Bo3g185830.1  |  |  |  |  |
|  |  |  |  | R2R3-MYB | Bo3g097710.1  |  |  |  |  |
|  |  |  |  | 1R-MYB   | Bo4g009260.1  |  |  |  |  |
|  |  |  |  | 1R-MYB   | Bo1g007270.1  |  |  |  |  |
|  |  |  |  | R2R3-MYB | Bo1g003420.1  |  |  |  |  |
|  |  |  |  | 1R-MYB   | Bo8g071010.1  |  |  |  |  |
|  |  |  |  | R2R3-MYB | Bo2g161180.1  |  |  |  |  |
|  |  |  |  | 1R-MYB   | Bo5g141210.1  |  |  |  |  |
|  |  |  |  | 1R-MYB   | Bo6g119010.1  |  |  |  |  |
|  |  |  |  | R2R3-MYB | Bo3g002960.1  |  |  |  |  |
|  |  |  |  | R2R3-MYB | Bo7g033260.1  |  |  |  |  |
|  |  |  |  | 1R-MYB   | Bo9g161410.1  |  |  |  |  |
|  |  |  |  | 1R-MYB   | Bo2g082370.1  |  |  |  |  |
|  |  |  |  | 1R-MYB   | Bo9g183320.1  |  |  |  |  |
|  |  |  |  | R2R3-MYB | Bo2g167960.1  |  |  |  |  |
|  |  |  |  | R2R3-MYB | Bo6g067190.1  |  |  |  |  |
|  |  |  |  | R2R3-MYB | Bo4g004500.1  |  |  |  |  |

**The identified five families of TFs in *A thaliana***

| Subfamily | AtAP2/EREBP | Subfami | AtbZIP      | Subfamily | AtMYB       | Subfamily | AtNAC       | Subfamily | AtWRKY      |
|-----------|-------------|---------|-------------|-----------|-------------|-----------|-------------|-----------|-------------|
| ERF_B-4   | AT2G33710.2 | VI      | AT3G12250.2 | R2R3-MYB  | AT5G56110.1 | XIV       | AT1G52880.1 | GroupII-c | AT1G29860.1 |
| AP2       | AT5G10510.1 | VI      | AT3G12250.4 | 3R-MYB    | AT4G32730.2 | XIV       | AT3G15510.1 | GroupII-e | AT1G29280.1 |
| ERF_B-6   | AT2G41710.3 | VI      | AT3G12250.1 | R2R3-MYB  | AT3G29020.1 | XIV       | AT1G61110.1 | GroupII-c | AT1G55600.1 |
| RAV       | AT1G13260.1 | VI      | AT3G12250.3 | R2R3-MYB  | AT3G13890.2 | XIV       | AT5G13180.1 | GroupII-b | AT1G80840.1 |
| ERF_B-5   | AT4G27950.1 | VI      | AT3G12250.5 | 1R-MYB    | AT1G18330.1 | XIV       | AT2G33480.1 | GroupII-b | AT1G18860.1 |
| DREB_A-6  | AT5G65130.1 | VI      | AT5G06950.1 | R2R3-MYB  | AT3G11450.1 | XIV       | AT2G33480.2 | GroupII-b | AT1G69810.1 |
| ERF_B-1   | AT3G20310.1 | VI      | AT5G06950.2 | 1R-MYB    | AT1G72740.1 | XIV       | AT1G69490.1 | GroupI    | AT1G13960.1 |
| DREB_A-4  | AT2G44940.1 | VI      | AT5G06950.3 | 1R-MYB    | AT4G00540.2 | XIV       | AT3G04070.1 | GroupII-c | AT1G69310.1 |
| DREB_A-5  | AT4G36900.1 | VI      | AT5G06950.4 | R2R3-MYB  | AT4G38620.1 | XIV       | AT3G04070.2 | GroupII-c | AT1G64000.1 |
| ERF_B-6   | AT3G25890.1 | VI      | AT5G06960.1 | 1R-MYB    | AT2G36960.2 | XIII      | AT1G77450.1 | GroupIII  | AT1G80590.1 |
| ERF_B-1   | AT1G50640.1 | VI      | AT5G06960.2 | 1R-MYB    | AT1G18960.1 | XIII      | AT1G01720.1 | GroupII-e | AT1G30650.1 |
| ERF_B-3   | AT4G17500.1 | VI      | AT1G68640.1 | 1R-MYB    | AT3G10590.1 | XIII      | AT5G63790.1 | GroupII-b | AT1G62300.1 |
| AP2       | AT1G16060.1 | VI      | AT1G08320.1 | R2R3-MYB  | AT3G13540.1 | XIII      | AT5G08790.1 | GroupII-b | AT1G68150.1 |
| ERF_B-2   | AT1G72360.1 | VI      | AT1G08320.3 | 1R-MYB    | AT4G18020.2 | XIII      | AT1G52890.1 | GroupIII  | AT1G66550.1 |
| ERF_B-6   | AT1G79700.1 | VI      | AT1G08320.2 | 4R-MYB    | AT3G18100.1 | XIII      | AT3G15500.1 | GroupIII  | AT1G66560.1 |

|          |             |     |             |          |             |      |             |           |             |
|----------|-------------|-----|-------------|----------|-------------|------|-------------|-----------|-------------|
| DREB_A-4 | AT5G52020.1 | VI  | AT5G06839.1 | R2R3-MYB | AT1G26780.1 | XIII | AT4G27410.2 | GroupIII  | AT1G66600.1 |
| DREB_A-6 | AT1G64380.1 | VI  | AT5G06839.2 | 1R-MYB   | AT5G53200.1 | XIII | AT4G27410.3 | GroupII-c | AT1G69310.2 |
| DREB_A-6 | AT2G20880.1 | VI  | AT5G06839.3 | R2R3-MYB | AT1G25340.2 | XIII | AT5G64530.1 | GroupI    | AT1G13960.2 |
| DREB_A-6 | AT2G22200.1 | V   | AT1G77920.1 | R2R3-MYB | AT3G23250.1 | XII  | AT1G76420.1 | GroupIII  | AT1G66550.2 |
| ERF_B-6  | AT2G41710.1 | V   | AT1G22070.1 | R2R3-MYB | AT5G16600.1 | XII  | AT2G24430.1 | GroupI    | AT2G60340.1 |
| ERF_B-4  | AT5G50080.1 | V   | AT5G10030.1 | R2R3-MYB | AT4G01680.2 | XII  | AT2G24430.2 | GroupII-e | AT2G34830.1 |
| ERF_B-6  | AT1G16060.2 | V   | AT5G10030.2 | 3R-MYB   | AT4G32730.1 | XII  | AT3G15170.1 | GroupII-b | AT2G25000.1 |
| DREB_A-5 | AT1G19210.1 | V   | AT5G65210.6 | 1R-MYB   | AT2G46830.1 | XII  | AT5G53950.1 | GroupII-c | AT2G44745.1 |
| DREB_A-5 | AT1G74930.1 | V   | AT5G65210.2 | R2R3-MYB | AT2G23290.1 | XII  | AT3G18400.1 | GroupII-d | AT2G30590.1 |
| DREB_A-4 | AT1G33760.1 | V   | AT5G65210.1 | R2R3-MYB | AT2G39880.1 | XII  | AT5G18270.1 | GroupI    | AT2G37260.1 |
| DREB_A-4 | AT4G32800.1 | V   | AT5G65210.3 | R2R3-MYB | AT3G47600.1 | XII  | AT5G18270.2 | GroupII-c | AT2G46130.1 |
| ERF_B-3  | AT5G61590.1 | V   | AT5G65210.4 | 1R-MYB   | AT3G46130.3 | XII  | AT3G04060.1 | GroupIII  | AT2G40740.1 |
| ERF_B-6  | AT5G11190.1 | V   | AT5G65210.5 | 1R-MYB   | AT5G02840.2 | XII  | AT3G29035.1 | GroupIII  | AT2G40750.1 |
| ERF_B-6  | AT4G13040.1 | IV  | AT2G16770.1 | R2R3-MYB | AT1G74430.1 | XII  | AT5G39610.1 | GroupII-c | AT2G47260.1 |
| DREB_A-5 | AT5G67190.1 | IV  | AT4G35040.1 | 1R-MYB   | AT3G36960.1 | XII  | AT5G61430.1 | GroupI    | AT2G04880.1 |
| ERF_B-5  | AT1G71130.1 | IV  | AT3G51960.2 | R2R3-MYB | AT4G21440.1 | XII  | AT5G07680.1 | GroupIII  | AT2G46400.1 |
| DREB_A-1 | AT1G63030.2 | IV  | AT3G51960.1 | R2R3-MYB | AT1G63910.1 | XII  | AT5G07680.2 | GroupI    | AT2G38470.1 |
| DREB_A-3 | AT2G40220.1 | III | AT5G49450.1 | R2R3-MYB | AT5G52600.1 | XI   | AT4G28530.1 | GroupII-c | AT2G21900.1 |
| DREB_A-5 | AT3G50260.1 | III | AT5G24800.1 | R2R3-MYB | AT3G46130.1 | XI   | AT4G28530.2 | GroupI    | AT2G45470.1 |
| ERF_B-5  | AT4G11140.1 | III | AT2G42380.1 | 1R-MYB   | AT4G39250.1 | XI   | AT3G12977.1 | GroupII-d | AT2G23320.1 |
| ERF_B-2  | AT3G16770.1 | III | AT2G42380.2 | 3R-MYB   | AT5G11510.2 | XI   | AT1G56010.1 | GroupI    | AT2G30250.1 |
| DREB_A-5 | AT4G06746.1 | III | AT3G58120.1 | R2R3-MYB | AT5G40330.1 | XI   | AT1G56010.2 | GroupII-c | AT2G46130.2 |
| ERF_B-4  | AT2G33710.1 | III | AT2G13150.1 | 1R-MYB   | AT3G04450.1 | X    | AT3G03200.1 | GroupI    | AT2G04880.2 |
| ERF_B-6  | AT1G68550.2 | III | AT2G12940.1 | R2R3-MYB | AT4G22680.1 | X    | AT5G17260.1 | GroupI    | AT2G37260.2 |
| ERF_B-1  | AT1G28360.1 | III | AT2G12900.1 | 1R-MYB   | AT4G18020.1 | X    | AT3G17730.1 | GroupII-c | AT3G62340.1 |
| DREB_A-2 | AT5G05410.2 | III | AT1G43700.1 | R2R3-MYB | AT3G49690.1 | X    | AT1G65910.1 | GroupIII  | AT3G56400.1 |
| ERF_B-1  | AT1G24590.1 | III | AT2G21230.1 | 1R-MYB   | AT2G18328.1 | X    | AT1G54330.1 | GroupI    | AT3G01080.1 |
| DREB_A-5 | AT4G31060.1 | III | AT2G21230.3 | R2R3-MYB | AT3G48920.1 | X    | AT1G32510.1 | GroupII-c | AT3G01970.1 |
| ERF_B-4  | AT5G07310.1 | III | AT2G21230.2 | 1R-MYB   | AT4G16420.1 | X    | AT4G17980.1 | GroupII-e | AT3G58710.1 |
| ERF_B-3  | AT5G51190.1 | III | AT4G38900.2 | 1R-MYB   | AT3G53790.1 | X    | AT5G46590.1 | GroupII-d | AT3G04670.1 |
| ERF_B-6  | AT1G49120.1 | III | AT4G38900.1 | R2R3-MYB | AT1G09540.1 | X    | AT2G18060.1 | GroupI    | AT3G58710.2 |
| AP2      | AT5G17430.1 | III | AT4G38900.3 | R2R3-MYB | AT4G37260.1 | X    | AT4G36160.1 | GroupII-b | AT4G04450.1 |
| ERF_B-1  | AT1G53170.1 | III | AT1G06850.1 | R2R3-MYB | AT5G57620.1 | X    | AT5G66300.1 | GroupII-e | AT4G23550.1 |
| DREB_A-6 | AT4G39780.1 | III | AT1G06850.2 | R2R3-MYB | AT1G69560.1 | X    | AT1G62700.1 | GroupI    | AT4G26440.1 |
| ERF_B-4  | AT5G64750.1 | III | AT2G40620.1 | R2R3-MYB | AT5G14750.1 | X    | AT1G12260.1 | GroupII-c | AT4G39410.1 |
| DREB_A-2 | AT2G38340.1 | III | AT1G06070.1 | 1R-MYB   | AT5G18240.5 | X    | AT5G62380.1 | GroupII-b | AT4G01720.1 |
| ERF_B-2  | AT1G53910.3 | III | AT2G31370.5 | R2R3-MYB | AT1G56160.1 | X    | AT1G71930.1 | GroupI    | AT4G26640.1 |
| ERF_B-2  | AT1G72360.2 | III | AT2G31370.3 | 1R-MYB   | AT3G09370.2 | X    | AT2G46770.1 | GroupIII  | AT4G23810.1 |
| ERF_B-6  | AT5G25190.1 | III | AT2G31370.2 | R2R3-MYB | AT5G60890.1 | X    | AT3G61910.1 | GroupII-c | AT4G18170.1 |
| ERF_B-3  | AT5G47220.1 | III | AT2G31370.1 | 1R-MYB   | AT1G19000.2 | X    | AT1G32770.1 | GroupII-d | AT4G31550.1 |
| ERF_B-3  | AT3G23220.1 | III | AT2G31370.4 | R2R3-MYB | AT5G17800.1 | X    | AT1G33280.1 | GroupII-b | AT4G31800.1 |
| ERF_B-6  | AT3G54990.1 | III | AT2G31370.6 | R2R3-MYB | AT5G54230.1 | X    | AT4G10350.1 | GroupI    | AT4G30935.1 |
| RAV      | AT1G25560.1 | II  | AT1G19490.1 | R2R3-MYB | AT5G23650.1 | X    | AT1G79580.1 | GroupII-e | AT4G01250.1 |
| AP2      | AT3G54320.1 | II  | AT3G10800.1 | 1R-MYB   | AT5G59780.2 | X    | AT1G79580.2 | GroupIII  | AT4G11070.1 |
| ERF_B-6  | AT5G60120.1 | II  | AT2G40950.1 | 1R-MYB   | AT5G56840.1 | X    | AT1G79580.3 | GroupII-b | AT4G22070.1 |
| ERF_B-1  | AT3G15210.1 | II  | AT3G56660.1 | R2R3-MYB | AT1G68320.1 | IX   | AT1G26870.1 | GroupII-d | AT4G24240.1 |
| AP2      | AT5G67180.1 | I   | AT1G49720.1 | R2R3-MYB | AT1G6490.1  | IX   | AT5G39820.1 | GroupII-d | AT4G31550.2 |
| ERF_B-1  | AT1G28160.1 | I   | AT1G49720.2 | R2R3-MYB | AT3G11440.1 | IX   | AT2G43000.1 | GroupIII  | AT4G11070.2 |
| ERF_B-5  | AT1G22985.1 | I   | AT3G19290.1 | 1R-MYB   | AT3G04030.2 | IX   | AT3G12910.1 | GroupI    | AT4G26640.2 |
| ERF_B-6  | AT2G39250.1 | I   | AT3G19290.3 | 1R-MYB   | AT4G16420.2 | VIII | AT3G10480.1 | GroupII-b | AT4G31800.2 |
| DREB_A-5 | AT1G71520.1 | I   | AT4G34000.3 | 1R-MYB   | AT4G34430.3 | VIII | AT3G10480.3 | GroupI    | AT5G56270.1 |
| ERF_B-1  | AT1G12890.1 | I   | AT4G34000.1 | 1R-MYB   | AT1G01060.3 | VIII | AT3G10480.2 | GroupIII  | AT5G01900.1 |
| DREB_A-1 | AT4G25470.1 | I   | AT4G34000.2 | R2R3-MYB | AT1G18710.1 | VIII | AT3G10490.1 | GroupII-c | AT5G49520.1 |
| RAV      | AT3G25730.1 | I   | AT1G45249.1 | 1R-MYB   | AT5G47390.1 | VIII | AT3G10490.2 | GroupII-d | AT5G28650.1 |
| RAV      | AT1G68840.2 | I   | AT3G56850.1 | R2R3-MYB | AT1G74650.1 | VIII | AT5G04400.1 | GroupIII  | AT5G22570.1 |
| AP2      | AT3G20840.1 | I   | AT2G41070.1 | 1R-MYB   | AT5G61620.1 | VIII | AT1G34180.1 | GroupII-e | AT5G52830.1 |
| DREB_A-4 | AT2G25820.1 | I   | AT2G41070.3 | R2R3-MYB | AT2G32460.1 | VIII | AT1G34180.2 | GroupII-c | AT5G26170.1 |
| ERF_B-6  | AT2G28550.1 | I   | AT2G41070.2 | R2R3-MYB | AT5G14340.1 | VIII | AT1G34190.1 | GroupII-c | AT5G46350.1 |
| DREB_A-4 | AT3G60490.1 | I   | AT2G36270.1 | R2R3-MYB | AT5G62470.1 | VIII | AT1G32870.1 | GroupII-c | AT5G13080.1 |
| ERF_B-6  | AT4G13040.2 | I   | AT3G44460.1 | R2R3-MYB | AT4G12350.1 | VIII | AT1G32870.2 | GroupII-c | AT5G43290.1 |
| ERF_B-3  | AT5G61600.1 | I   | AT5G42910.1 | 1R-MYB   | AT5G18240.4 | VIII | AT3G10500.1 | GroupI    | AT5G07100.1 |
| DREB_A-2 | AT2G40350.1 | I   | AT1G03970.1 | 1R-MYB   | AT3G46130.4 | VIII | AT5G04410.1 | GroupII-c | AT5G41570.1 |
| ERF_B-3  | AT5G07580.1 | I   | AT5G44080.1 | 1R-MYB   | AT5G67580.1 | VIII | AT5G64060.1 | GroupII-b | AT5G15130.1 |
| ERF_B-3  | AT2G44840.1 | I   | AT2G17770.2 | 1R-MYB   | AT5G67580.2 | VIII | AT5G09330.1 | GroupIII  | AT5G24110.1 |
| ERF_B-4  | AT5G13330.1 | I   | AT4G35900.1 | R2R3-MYB | AT3G12720.1 | VIII | AT5G09330.2 | GroupII-e | AT5G45050.1 |
| ERF_B-3  | AT5G47230.1 | I   | AT5G11260.1 | 1R-MYB   | AT3G10113.1 | VIII | AT5G09330.3 | GroupII-c | AT5G64810.1 |
| DREB_A-2 | AT2G40340.1 | I   | AT3G17609.3 | 1R-MYB   | AT1G49950.1 | VIII | AT5G09330.4 | GroupII-e | AT5G45260.1 |
| AP2      | AT4G36920.1 | I   | AT3G17609.4 | R2R3-MYB | AT5G05790.1 | VII  | AT5G14000.1 | GroupII-e | AT5G45050.2 |
| AP2      | AT5G65510.1 | I   | AT3G17609.1 | 1R-MYB   | AT1G49950.2 | VII  | AT5G50820.1 | GroupI    | AT5G07100.2 |
| DREB_A-5 | AT1G46768.1 | I   | AT3G17609.2 | R2R3-MYB | AT5G04760.1 | VII  | AT2G02450.1 |           |             |
| ERF_B-5  | AT3G61630.1 | I   | AT1G42990.1 | R2R3-MYB | AT2G26960.1 | VII  | AT2G02450.2 |           |             |
| DREB_A-2 | AT1G75490.1 | I   | AT5G07160.1 | 1R-MYB   | AT1G49950.3 | VII  | AT2G17040.1 |           |             |
| ERF_B-2  | AT1G72360.3 | I   | AT3G54620.1 | 1R-MYB   | AT1G19000.1 | VII  | AT5G22380.1 |           |             |
| DREB_A-4 | AT5G25810.1 | I   | AT3G54620.3 | R2R3-MYB | AT3G62610.1 | VII  | AT3G44350.1 |           |             |
| DREB_A-4 | AT4G16750.1 | I   | AT3G54620.2 | R2R3-MYB | AT5G06100.2 | VII  | AT3G44350.2 |           |             |
| DREB_A-4 | AT3G16280.1 | I   | AT4G02640.1 | 1R-MYB   | AT5G17300.1 | VI   | AT3G44290.1 |           |             |
| ERF_B-3  | AT4G34410.1 | I   | AT4G02640.2 | R2R3-MYB | AT3G50060.1 | VI   | AT5G22290.1 |           |             |

|          |             |   |             |          |             |     |             |  |  |
|----------|-------------|---|-------------|----------|-------------|-----|-------------|--|--|
| ERF_B-6  | AT3G54320.2 | I | AT5G28770.3 | 1R-MYB   | AT4G16420.3 | VI  | AT2G27300.1 |  |  |
| DREB_A-6 | AT1G22190.1 | I | AT5G28770.1 | 1R-MYB   | AT1G18330.2 | VI  | AT3G49530.1 |  |  |
| DREB_A-1 | AT4G25480.1 | I | AT5G28770.2 | R2R3-MYB | AT2G47460.1 | VI  | AT5G24590.2 |  |  |
| ERF_B-6  | AT5G25390.1 | I | AT1G32150.1 | 1R-MYB   | AT3G07740.1 | VI  | AT1G33060.1 |  |  |
| ERF_B-3  | AT2G31230.1 | I | AT2G35530.1 | 1R-MYB   | AT4G18020.4 | VI  | AT1G33060.2 |  |  |
| ERF_B-6  | AT1G15360.1 | I | AT4G36730.1 | 1R-MYB   | AT3G04030.1 | VI  | AT4G35580.1 |  |  |
| AP2      | AT3G54320.3 | I | AT4G36730.2 | 1R-MYB   | AT5G52660.1 | VI  | AT4G35580.2 |  |  |
| DREB_A-1 | AT1G12610.1 | I | AT4G01120.1 | 1R-MYB   | AT1G72650.1 | VI  | AT4G35580.3 |  |  |
| ERF_B-2  | AT3G14230.1 | I | AT2G46270.1 | R2R3-MYB | AT3G29020.2 | V   | AT1G64105.1 |  |  |
| DREB_A-4 | AT1G71450.1 | I | AT2G46270.2 | R2R3-MYB | AT5G61420.2 | V   | AT1G64100.2 |  |  |
| DREB_A-2 | AT3G57600.1 | I | AT5G08141.1 | 1R-MYB   | AT3G10580.2 | V   | AT5G18300.1 |  |  |
| ERF_B-2  | AT3G14230.2 | I | AT5G60830.1 | R2R3-MYB | AT1G79180.1 | V   | AT1G60240.1 |  |  |
| DREB_A-5 | AT1G44830.1 | I | AT2G22850.1 | R2R3-MYB | AT1G66230.1 | V   | AT1G60280.1 |  |  |
| DREB_A-6 | AT4G13620.1 | I | AT2G22850.2 | R2R3-MYB | AT2G25230.1 | V   | AT1G60380.1 |  |  |
| ERF_B-1  | AT1G12980.1 | I | AT4G37730.1 | R2R3-MYB | AT5G15310.1 | V   | AT1G60350.1 |  |  |
| DREB_A-5 | AT2G23340.1 | I | AT3G49760.1 | R2R3-MYB | AT2G16720.1 | V   | AT1G60340.1 |  |  |
| ERF_B-6  | AT5G19790.1 | I | AT1G59530.1 | 1R-MYB   | AT3G60460.1 | V   | AT1G60300.1 |  |  |
| DREB_A-1 | AT5G51990.1 | I | AT1G75390.1 | R2R3-MYB | AT2G31180.1 | IV  | AT4G01540.1 |  |  |
| ERF_B-4  | AT1G43160.1 | I | AT1G75390.2 | 1R-MYB   | AT1G74840.2 | IV  | AT4G01540.2 |  |  |
| ERF_B-6  | AT5G60120.2 | I | AT4G34590.1 | R2R3-MYB | AT3G28910.1 | IV  | AT4G01520.1 |  |  |
| ERF_B-1  | AT1G03800.1 | I | AT2G18160.1 | R2R3-MYB | AT3G06490.1 | IV  | AT4G01550.1 |  |  |
| DREB_A-6 | AT1G36060.1 | I | AT3G62420.1 | 1R-MYB   | AT1G21700.1 | IV  | AT3G04430.1 |  |  |
| AP2      | AT1G51190.1 | I | AT1G68880.1 | 1R-MYB   | AT3G10580.1 | IV  | AT1G01010.1 |  |  |
| ERF_B-3  | AT4G18450.1 | I | AT1G13600.1 | R2R3-MYB | AT1G66390.1 | IV  | AT1G02210.1 |  |  |
| DREB_A-6 | AT4G28140.1 | I | AT2G04038.1 | 1R-MYB   | AT1G49010.1 | IV  | AT1G02250.1 |  |  |
| DREB_A-4 | AT1G01250.1 | I | AT5G15830.1 | R2R3-MYB | AT5G62470.2 | IV  | AT1G02230.1 |  |  |
| DREB_A-6 | AT1G78080.1 | I | AT3G30530.1 | 1R-MYB   | AT4G18020.5 | IV  | AT3G04410.1 |  |  |
| ERF_B-6  | AT3G25890.2 | I | AT5G38800.1 | 1R-MYB   | AT4G01280.2 | IV  | AT1G02220.1 |  |  |
| ERF_B-1  | AT5G18560.1 |   |             | R2R3-MYB | AT5G15310.2 | IV  | AT3G04420.1 |  |  |
| ERF_B-6  | AT2G41710.2 |   |             | 1R-MYB   | AT1G17460.2 | IV  | AT3G04420.2 |  |  |
| DREB_A-2 | AT5G05410.1 |   |             | 1R-MYB   | AT1G01380.1 | III | AT3G01600.1 |  |  |
| ERF_B-3  | AT3G23240.1 |   |             | 1R-MYB   | AT1G15720.1 | III | AT5G14490.1 |  |  |
| AP2      | AT5G57390.1 |   |             | R2R3-MYB | AT5G06100.3 | III | AT1G25580.1 |  |  |
| DREB_A-5 | AT1G22810.1 |   |             | R2R3-MYB | AT1G73410.1 | III | AT1G28470.1 |  |  |
| ERF_B-3  | AT5G43410.1 |   |             | R2R3-MYB | AT2G26950.1 | III | AT4G28500.1 |  |  |
| ERF_B-6  | AT4G13040.3 |   |             | 1R-MYB   | AT1G09710.2 | III | AT4G29230.1 |  |  |
| ERF_B-1  | AT5G13910.1 |   |             | R2R3-MYB | AT3G61250.1 | III | AT5G56620.1 |  |  |
| ERF_B-3  | AT3G23230.1 |   |             | 1R-MYB   | AT4G34430.1 | II  | AT1G03490.1 |  |  |
| DREB_A-4 | AT2G35700.1 |   |             | 1R-MYB   | AT4G16110.1 | II  | AT1G19040.1 |  |  |
| ERF_B-5  | AT4G23750.1 |   |             | 1R-MYB   | AT5G29000.3 | II  | AT3G56520.1 |  |  |
| DREB_A-1 | AT4G25490.1 |   |             | R2R3-MYB | AT4G37780.1 | II  | AT5G41090.1 |  |  |
| ERF_B-5  | AT2G46310.1 |   |             | R2R3-MYB | AT2G47190.1 | I   | AT3G56560.1 |  |  |
| ERF_B-6  | AT1G68550.1 |   |             | 1R-MYB   | AT1G17460.1 | I   | AT3G56530.1 |  |  |
| DREB_A-2 | AT5G18450.1 |   |             | R2R3-MYB | AT5G07700.1 | I   | AT3G55210.1 |  |  |
| ERF_B-3  | AT4G17490.1 |   |             | 1R-MYB   | AT2G36960.3 | I   | AT5G39690.1 |  |  |
| ERF_B-2  | AT2G47520.1 |   |             | 3R-MYB   | AT5G11510.1 |     |             |  |  |
| DREB_A-5 | AT5G21960.1 |   |             | 1R-MYB   | AT5G06110.1 |     |             |  |  |
| ERF_B-6  | AT5G67010.1 |   |             | R2R3-MYB | AT5G01200.1 |     |             |  |  |
| ERF_B-5  | AT5G53290.1 |   |             | 3R-MYB   | AT5G02320.2 |     |             |  |  |
| ERF_B-6  | AT5G10510.3 |   |             | R2R3-MYB | AT4G01680.1 |     |             |  |  |
| DREB_A-5 | AT1G77640.1 |   |             | R2R3-MYB | AT3G01140.1 |     |             |  |  |
| AP2      | AT5G10510.2 |   |             | 1R-MYB   | AT5G58340.2 |     |             |  |  |
| ERF_B-2  | AT3G14230.3 |   |             | R2R3-MYB | AT3G55730.1 |     |             |  |  |
| AP2      | AT4G37750.1 |   |             | 1R-MYB   | AT5G18240.2 |     |             |  |  |
| ERF_B-1  | AT5G44210.1 |   |             | R2R3-MYB | AT3G08500.1 |     |             |  |  |
| DREB_A-1 | AT1G63030.1 |   |             | 1R-MYB   | AT1G58220.1 |     |             |  |  |
| DREB_A-4 | AT1G12630.1 |   |             | R2R3-MYB | AT5G39700.1 |     |             |  |  |
| ERF_B-3  | AT1G04370.1 |   |             | R2R3-MYB | AT5G65230.1 |     |             |  |  |
| AP2      | AT4G36920.2 |   |             | 1R-MYB   | AT5G29000.4 |     |             |  |  |
| ERF_B-5  | AT4G23750.2 |   |             | 1R-MYB   | AT2G47620.1 |     |             |  |  |
| DREB_A-4 | AT5G11590.1 |   |             | 1R-MYB   | AT3G21430.2 |     |             |  |  |
| DREB_A-4 | AT2G36450.1 |   |             | R2R3-MYB | AT4G17785.1 |     |             |  |  |
| ERF_B-1  | AT1G80580.1 |   |             | 1R-MYB   | AT2G13960.1 |     |             |  |  |
| RAV      | AT1G68840.1 |   |             | R2R3-MYB | AT1G25340.1 |     |             |  |  |
| AP2      | AT2G28550.3 |   |             | R2R3-MYB | AT1G18570.1 |     |             |  |  |
| ERF_B-1  | AT1G28370.1 |   |             | R2R3-MYB | AT4G26930.1 |     |             |  |  |
| AP2      | AT1G72570.1 |   |             | R2R3-MYB | AT5G16770.2 |     |             |  |  |
| ERF_B-4  | AT5G61890.1 |   |             | 1R-MYB   | AT2G30420.1 |     |             |  |  |
| ERF_B-2  | AT1G53910.2 |   |             | 1R-MYB   | AT3G57980.1 |     |             |  |  |
| ERF_B-6  | AT2G28550.2 |   |             | R2R3-MYB | AT1G48000.1 |     |             |  |  |
| DREB_A-2 | AT3G11020.1 |   |             | 1R-MYB   | AT3G09600.2 |     |             |  |  |
| DREB_A-5 | AT1G21910.1 |   |             | R2R3-MYB | AT4G01680.3 |     |             |  |  |
| AP2      | AT1G79700.2 |   |             | 1R-MYB   | AT1G01520.1 |     |             |  |  |
| DREB_A-4 | AT1G77200.1 |   |             | R2R3-MYB | AT3G12820.1 |     |             |  |  |
| ERF_B-2  | AT1G53910.1 |   |             | 1R-MYB   | AT5G06110.2 |     |             |  |  |
| ERF_B-6  | AT3G54990.2 |   |             | 1R-MYB   | AT4G09450.1 |     |             |  |  |
| ERF_B-3  | AT1G06160.1 |   |             | R2R3-MYB | AT5G35550.1 |     |             |  |  |

|         |             |  |  |          |             |  |  |  |  |
|---------|-------------|--|--|----------|-------------|--|--|--|--|
| ERF_B-6 | AT5G25390.2 |  |  | R2R3-MYB | AT3G01530.1 |  |  |  |  |
|         |             |  |  | 1R-MYB   | AT5G58900.1 |  |  |  |  |
|         |             |  |  | 1R-MYB   | AT1G72740.2 |  |  |  |  |
|         |             |  |  | R2R3-MYB | AT5G26660.1 |  |  |  |  |
|         |             |  |  | R2R3-MYB | AT4G34990.1 |  |  |  |  |
|         |             |  |  | R2R3-MYB | AT1G35515.1 |  |  |  |  |
|         |             |  |  | 1R-MYB   | AT5G29000.1 |  |  |  |  |
|         |             |  |  | R2R3-MYB | AT2G32460.2 |  |  |  |  |
|         |             |  |  | 1R-MYB   | AT1G70000.1 |  |  |  |  |
|         |             |  |  | 1R-MYB   | AT5G18240.1 |  |  |  |  |
|         |             |  |  | R2R3-MYB | AT3G02940.1 |  |  |  |  |
|         |             |  |  | 1R-MYB   | AT1G01060.4 |  |  |  |  |
|         |             |  |  | 1R-MYB   | AT2G42150.1 |  |  |  |  |
|         |             |  |  | R2R3-MYB | AT5G49620.1 |  |  |  |  |
|         |             |  |  | R2R3-MYB | AT3G24310.1 |  |  |  |  |
|         |             |  |  | R2R3-MYB | AT4G28110.1 |  |  |  |  |
|         |             |  |  | 1R-MYB   | AT1G01060.2 |  |  |  |  |
|         |             |  |  | R2R3-MYB | AT5G40350.1 |  |  |  |  |
|         |             |  |  | R2R3-MYB | AT4G13480.1 |  |  |  |  |
|         |             |  |  | 1R-MYB   | AT3G16857.1 |  |  |  |  |
|         |             |  |  | R2R3-MYB | AT1G56650.1 |  |  |  |  |
|         |             |  |  | R2R3-MYB | AT5G62320.1 |  |  |  |  |
|         |             |  |  | 1R-MYB   | AT5G02840.3 |  |  |  |  |
|         |             |  |  | 1R-MYB   | AT1G71030.1 |  |  |  |  |
|         |             |  |  | R2R3-MYB | AT3G27920.1 |  |  |  |  |
|         |             |  |  | 1R-MYB   | AT3G09370.1 |  |  |  |  |
|         |             |  |  | R2R3-MYB | AT5G07690.1 |  |  |  |  |
|         |             |  |  | R2R3-MYB | AT3G13890.1 |  |  |  |  |
|         |             |  |  | 1R-MYB   | AT4G34430.4 |  |  |  |  |
|         |             |  |  | R2R3-MYB | AT5G49620.2 |  |  |  |  |
|         |             |  |  | R2R3-MYB | AT1G17950.1 |  |  |  |  |
|         |             |  |  | R2R3-MYB | AT1G06180.1 |  |  |  |  |
|         |             |  |  | R2R3-MYB | AT2G38090.1 |  |  |  |  |
|         |             |  |  | R2R3-MYB | AT5G16770.1 |  |  |  |  |
|         |             |  |  | 1R-MYB   | AT3G16857.2 |  |  |  |  |
|         |             |  |  | R2R3-MYB | AT5G55020.1 |  |  |  |  |
|         |             |  |  | 1R-MYB   | AT4G18020.6 |  |  |  |  |
|         |             |  |  | R2R3-MYB | AT1G66370.1 |  |  |  |  |
|         |             |  |  | R2R3-MYB | AT4G05100.1 |  |  |  |  |
|         |             |  |  | R2R3-MYB | AT3G11280.2 |  |  |  |  |
|         |             |  |  | R2R3-MYB | AT3G52250.1 |  |  |  |  |
|         |             |  |  | R2R3-MYB | AT2G36890.1 |  |  |  |  |
|         |             |  |  | R2R3-MYB | AT5G67300.1 |  |  |  |  |
|         |             |  |  | R2R3-MYB | AT1G34670.1 |  |  |  |  |
|         |             |  |  | 1R-MYB   | AT5G29000.2 |  |  |  |  |
|         |             |  |  | R2R3-MYB | AT5G06100.1 |  |  |  |  |
|         |             |  |  | 1R-MYB   | AT2G30432.1 |  |  |  |  |
|         |             |  |  | 1R-MYB   | AT1G70000.2 |  |  |  |  |
|         |             |  |  | 1R-MYB   | AT4G00540.1 |  |  |  |  |
|         |             |  |  | 1R-MYB   | AT3G07740.4 |  |  |  |  |
|         |             |  |  | R2R3-MYB | AT5G59780.3 |  |  |  |  |
|         |             |  |  | 4R-MYB   | AT3G18100.2 |  |  |  |  |
|         |             |  |  | 1R-MYB   | AT3G09600.1 |  |  |  |  |
|         |             |  |  | 1R-MYB   | AT1G72650.2 |  |  |  |  |
|         |             |  |  | R2R3-MYB | AT1G08810.1 |  |  |  |  |
|         |             |  |  | 1R-MYB   | AT3G07740.3 |  |  |  |  |
|         |             |  |  | 1R-MYB   | AT3G07740.2 |  |  |  |  |
|         |             |  |  | R2R3-MYB | AT3G53200.1 |  |  |  |  |
|         |             |  |  | R2R3-MYB | AT5G10280.1 |  |  |  |  |
|         |             |  |  | 1R-MYB   | AT4G34430.2 |  |  |  |  |
|         |             |  |  | 1R-MYB   | AT3G60110.1 |  |  |  |  |
|         |             |  |  | R2R3-MYB | AT1G26780.2 |  |  |  |  |
|         |             |  |  | R2R3-MYB | AT3G30210.1 |  |  |  |  |
|         |             |  |  | 1R-MYB   | AT5G37260.1 |  |  |  |  |
|         |             |  |  | R2R3-MYB | AT5G65790.1 |  |  |  |  |
|         |             |  |  | 1R-MYB   | AT5G18240.3 |  |  |  |  |
|         |             |  |  | 1R-MYB   | AT5G58340.1 |  |  |  |  |
|         |             |  |  | 1R-MYB   | AT4G01280.1 |  |  |  |  |
|         |             |  |  | R2R3-MYB | AT3G27810.1 |  |  |  |  |
|         |             |  |  | R2R3-MYB | AT1G74080.1 |  |  |  |  |
|         |             |  |  | 1R-MYB   | AT1G01060.1 |  |  |  |  |
|         |             |  |  | 1R-MYB   | AT5G02840.1 |  |  |  |  |
|         |             |  |  | R2R3-MYB | AT4G09460.1 |  |  |  |  |
|         |             |  |  | R2R3-MYB | AT5G52260.1 |  |  |  |  |
|         |             |  |  | 1R-MYB   | AT2G30424.1 |  |  |  |  |
|         |             |  |  | R2R3-MYB | AT5G12870.1 |  |  |  |  |
|         |             |  |  | R2R3-MYB | AT5G23000.1 |  |  |  |  |

|  |  |  |  |          |             |  |  |  |  |
|--|--|--|--|----------|-------------|--|--|--|--|
|  |  |  |  | 1R-MYB   | AT2G46410.1 |  |  |  |  |
|  |  |  |  | R2R3-MYB | AT3G28470.1 |  |  |  |  |
|  |  |  |  | R2R3-MYB | AT5G49330.1 |  |  |  |  |
|  |  |  |  | R2R3-MYB | AT5G08520.1 |  |  |  |  |
|  |  |  |  | 1R-MYB   | AT3G16350.1 |  |  |  |  |
|  |  |  |  | 1R-MYB   | AT1G09710.1 |  |  |  |  |
|  |  |  |  | R2R3-MYB | AT4G25560.1 |  |  |  |  |
|  |  |  |  | R2R3-MYB | AT1G57560.1 |  |  |  |  |
|  |  |  |  | 1R-MYB   | AT1G74840.1 |  |  |  |  |
|  |  |  |  | R2R3-MYB | AT3G11280.1 |  |  |  |  |
|  |  |  |  | 1R-MYB   | AT3G49850.1 |  |  |  |  |
|  |  |  |  | 1R-MYB   | AT2G13960.2 |  |  |  |  |
|  |  |  |  | 1R-MYB   | AT5G52660.2 |  |  |  |  |
|  |  |  |  | 3R-MYB   | AT5G02320.1 |  |  |  |  |
|  |  |  |  | 1R-MYB   | AT4G18020.3 |  |  |  |  |
|  |  |  |  | 1R-MYB   | AT2G33610.1 |  |  |  |  |
|  |  |  |  | R2R3-MYB | AT1G22640.1 |  |  |  |  |
|  |  |  |  | 4R-MYB   | AT3G18100.3 |  |  |  |  |
|  |  |  |  | 1R-MYB   | AT3G04030.3 |  |  |  |  |
|  |  |  |  | 1R-MYB   | AT3G23250.2 |  |  |  |  |
|  |  |  |  | R2R3-MYB | AT1G66380.1 |  |  |  |  |
|  |  |  |  | R2R3-MYB | AT3G09230.1 |  |  |  |  |
|  |  |  |  | 1R-MYB   | AT2G44430.1 |  |  |  |  |
