# Supplementary material for: Exploring transcription factors reveals crucial members and regulatory networks involved in different abiotic stresses in Brassica napus L
Source: PubMed Central journal article supplement (PMC6146658; doi:10.1186/s12870-018-1417-z), 2018-09-19
Supplement: 12870_2018_1417_MOESM3_ESM.pdf [file 12870_2018_1417_MOESM3_ESM.pdf]

**Additional file 3 Statistics for synteny analysis**

**Subfamily distributions of novel, conserved and multi-copy genes in *B. napus***

| Subfamilies | BnAP2/EREBP |             |             |         | BnbZIP      |           |           |            |         |
|-------------|-------------|-------------|-------------|---------|-------------|-----------|-----------|------------|---------|
|             | Novel       | Conserved   | Multi-copy  | Row sum | Subfamilies | Novel     | Conserved | Multi-copy | Row sum |
| AP2         | 1           | 1           | 30          | 32      | I           | 1         | 1         | 10         | 12      |
| DREB_A-1    | 1           | 3           | 13          | 17      | II          | 2         | 0         | 37         | 39      |
| DREB_A-2    | 2           | 3           | 25          | 30      | III         | 5         | 4         | 54         | 63      |
| DREB_A-3    | 0           | 1           | 2           | 3       | IV          | 0         | 0         | 2          | 2       |
| DREB_A-4    | 4           | 16          | 46          | 66      | IX          | 1         | 4         | 6          | 11      |
| DREB_A-5    | 3           | 7           | 32          | 42      | V           | 4         | 5         | 25         | 34      |
| DREB_A-6    | 2           | 2           | 32          | 36      | VI          | 1         | 1         | 2          | 4       |
| ERF         | 1           | 1           | 26          | 28      | VII         | 6         | 1         | 34         | 41      |
| ERF_B-1     | 2           | 5           | 54          | 61      | VIII        | 0         | 2         | 2          | 4       |
| ERF_B-2     | 1           | 1           | 16          | 18      | X           | 0         | 3         | 17         | 20      |
| ERF_B-3     | 11          | 15          | 50          | 76      | XI          | 0         | 0         | 2          | 2       |
| ERF_B-4     | 2           | 5           | 14          | 21      | XII         | 2         | 5         | 13         | 20      |
| ERF_B-5     | 1           | 1           | 23          | 25      | Total       | 22        | 26        | 204        | 252     |
| ERF_B-6     | 2           | 3           | 38          | 43      | Ratio       | 0.0873016 | 0.1031746 | 0.80952381 | 1       |
| RAV         | 0           | 2           | 18          | 20      |             |           |           |            |         |
| Total       | 33          | 66          | 419         | 518     |             |           |           |            |         |
| Ratio       | 0.063706564 | 0.127413127 | 0.808880309 | 1       |             |           |           |            |         |

| Subfamilies | BnMYB       |             |             |         | BnNAC       |           |           |            |         |
|-------------|-------------|-------------|-------------|---------|-------------|-----------|-----------|------------|---------|
|             | Novel       | Conserved   | Multi-copy  | Row sum | Subfamilies | Novel     | Conserved | Multi-copy | Row sum |
| 1R-MYB      | 30          | 18          | 232         | 280     | I           | 0         | 0         | 3          | 3       |
| 3R-MYB      | 1           | 0           | 15          | 16      | II          | 6         | 4         | 25         | 35      |
| 4R-MYB      | 0           | 0           | 1           | 1       | III         | 0         | 4         | 20         | 24      |
| R2R3-MYB    | 34          | 36          | 354         | 424     | IV          | 5         | 12        | 29         | 46      |
| Total       | 65          | 54          | 602         | 721     | IX          | 1         | 0         | 43         | 44      |
| Ratio       | 0.090152566 | 0.074895978 | 0.834951456 | 1       | V           | 2         | 3         | 16         | 21      |
|             |             |             |             |         | VI          | 7         | 4         | 70         | 81      |
|             |             |             |             |         | VII         | 2         | 2         | 36         | 40      |
|             |             |             |             |         | VIII        | 2         | 0         | 43         | 45      |
|             |             |             |             |         | X           | 0         | 0         | 12         | 12      |
|             |             |             |             |         | XI          | 0         | 1         | 2          | 3       |
|             |             |             |             |         | XII         | 1         | 0         | 5          | 6       |
|             |             |             |             |         | XIII        | 2         | 0         | 11         | 13      |
|             |             |             |             |         | XIV         | 0         | 0         | 4          | 4       |
|             |             |             |             |         | XV          | 1         | 0         | 7          | 8       |
|             |             |             |             |         | XVI         | 0         | 0         | 5          | 5       |
|             |             |             |             |         | XVII        | 0         | 0         | 8          | 8       |
|             |             |             |             |         | Total       | 29        | 30        | 339        | 398     |
|             |             |             |             |         | Ratio       | 0.0728643 | 0.0753769 | 0.85175879 | 1       |

**Chromosome distributions for novel, conserved and multi-copy genes in the three Brassica species**

| Chromosome | Novel     |      |     |     |      |    | Row sum |
|------------|-----------|------|-----|-----|------|----|---------|
|            | AP2/EREBP | bZIP | MYB | NAC | WRKY |    |         |
| A01        | 2         | 0    | 0   | 0   | 1    | 3  |         |
| A02        | 1         | 2    | 1   | 0   | 0    | 4  |         |
| A03        | 2         | 0    | 1   | 0   | 1    | 4  |         |
| A04        | 0         | 1    | 0   | 0   | 0    | 1  |         |
| A05        | 1         | 1    | 0   | 0   | 0    | 2  |         |
| A06        | 1         | 1    | 0   | 0   | 0    | 2  |         |
| A07        | 1         | 0    | 1   | 0   | 0    | 2  |         |
| A08        | 3         | 1    | 1   | 0   | 0    | 5  |         |
| A09        | 1         | 1    | 2   | 0   | 0    | 4  |         |
| A10        | 0         | 0    | 2   | 1   | 0    | 3  |         |
| ChrA01     | 2         | 0    | 4   | 1   | 0    | 7  |         |
| ChrA02     | 0         | 1    | 0   | 0   | 1    | 2  |         |
| ChrA03     | 1         | 0    | 5   | 2   | 0    | 8  |         |
| ChrA04     | 1         | 2    | 1   | 1   | 1    | 6  |         |
| ChrA05     | 1         | 0    | 2   | 0   | 0    | 3  |         |
| ChrA06     | 0         | 0    | 7   | 1   | 2    | 10 |         |
| ChrA07     | 3         | 0    | 3   | 0   | 0    | 6  |         |
| ChrA08     | 4         | 1    | 1   | 0   | 0    | 6  |         |
| ChrA09     | 2         | 2    | 1   | 3   | 2    | 10 |         |
| ChrA10     | 1         | 1    | 2   | 1   | 0    | 5  |         |
| ChrAnn     | 2         | 3    | 3   | 2   | 2    | 12 |         |
| C1         | 1         | 1    | 0   | 1   | 0    | 3  |         |
| C2         | 1         | 0    | 2   | 4   | 1    | 8  |         |
| C3         | 2         | 1    | 2   | 2   | 1    | 8  |         |
| C4         | 2         | 1    | 5   | 0   | 0    | 8  |         |
| C5         | 2         | 0    | 1   | 5   | 0    | 8  |         |
| C6         | 1         | 1    | 1   | 1   | 1    | 5  |         |
| C7         | 1         | 0    | 1   | 1   | 1    | 4  |         |
| C8         | 0         | 0    | 1   | 0   | 0    | 1  |         |
| C9         | 2         | 0    | 0   | 1   | 0    | 3  |         |

|                   |                  |             |            |            |             |                |  |  |  |
|-------------------|------------------|-------------|------------|------------|-------------|----------------|--|--|--|
| ChrC01            | 2                | 1           | 0          | 2          | 0           | 5              |  |  |  |
| ChrC02            | 1                | 0           | 5          | 2          | 1           | 9              |  |  |  |
| ChrC03            | 3                | 2           | 2          | 4          | 2           | 13             |  |  |  |
| ChrC04            | 1                | 1           | 5          | 2          | 4           | 13             |  |  |  |
| ChrC05            | 1                | 1           | 4          | 2          | 0           | 8              |  |  |  |
| ChrC06            | 2                | 2           | 2          | 1          | 1           | 8              |  |  |  |
| ChrC07            | 0                | 0           | 1          | 0          | 0           | 1              |  |  |  |
| ChrC08            | 1                | 2           | 3          | 1          | 1           | 8              |  |  |  |
| ChrC09            | 1                | 0           | 3          | 0          | 0           | 4              |  |  |  |
| ChrCnn            | 4                | 2           | 11         | 3          | 1           | 21             |  |  |  |
| ChrUnn            | 0                | 1           | 0          | 0          | 0           | 1              |  |  |  |
| <b>Conserved</b>  |                  |             |            |            |             |                |  |  |  |
| <b>Chromosome</b> | <b>AP2/EREBP</b> | <b>bZIP</b> | <b>MYB</b> | <b>NAC</b> | <b>WRKY</b> | <b>Row sum</b> |  |  |  |
| A01               | 5                | 2           | 6          | 0          | 2           | 15             |  |  |  |
| A02               | 3                | 2           | 7          | 1          | 4           | 17             |  |  |  |
| A03               | 6                | 2           | 7          | 3          | 0           | 18             |  |  |  |
| A04               | 5                | 3           | 7          | 0          | 2           | 17             |  |  |  |
| A05               | 4                | 0           | 5          | 0          | 1           | 10             |  |  |  |
| A06               | 8                | 1           | 7          | 3          | 2           | 21             |  |  |  |
| A07               | 6                | 4           | 3          | 3          | 0           | 16             |  |  |  |
| A08               | 8                | 1           | 2          | 0          | 4           | 15             |  |  |  |
| A09               | 9                | 4           | 4          | 4          | 3           | 24             |  |  |  |
| A10               | 4                | 0           | 1          | 7          | 1           | 13             |  |  |  |
| ChrA01            | 3                | 2           | 1          | 0          | 1           | 7              |  |  |  |
| ChrA02            | 2                | 0           | 3          | 1          | 3           | 9              |  |  |  |
| ChrA03            | 3                | 2           | 3          | 2          | 0           | 10             |  |  |  |
| ChrA04            | 1                | 3           | 4          | 0          | 1           | 9              |  |  |  |
| ChrA05            | 1                | 0           | 2          | 0          | 0           | 3              |  |  |  |
| ChrA06            | 4                | 0           | 3          | 1          | 1           | 9              |  |  |  |
| ChrA07            | 1                | 2           | 2          | 3          | 0           | 8              |  |  |  |
| ChrA08            | 6                | 1           | 2          | 0          | 2           | 11             |  |  |  |
| ChrA09            | 1                | 2           | 1          | 2          | 2           | 8              |  |  |  |
| ChrA10            | 2                | 0           | 0          | 5          | 0           | 7              |  |  |  |
| ChrAnn            | 2                | 1           | 5          | 0          | 1           | 9              |  |  |  |
| C1                | 6                | 2           | 9          | 1          | 2           | 20             |  |  |  |
| C2                | 2                | 3           | 8          | 2          | 1           | 16             |  |  |  |
| C3                | 8                | 4           | 10         | 3          | 7           | 32             |  |  |  |
| C4                | 7                | 1           | 5          | 2          | 3           | 18             |  |  |  |
| C5                | 7                | 0           | 6          | 4          | 1           | 18             |  |  |  |
| C6                | 7                | 4           | 3          | 3          | 0           | 17             |  |  |  |
| C7                | 5                | 2           | 3          | 0          | 1           | 11             |  |  |  |
| C8                | 11               | 4           | 5          | 1          | 2           | 23             |  |  |  |
| C9                | 5                | 1           | 3          | 3          | 2           | 14             |  |  |  |
| ChrC01            | 3                | 1           | 8          | 1          | 0           | 13             |  |  |  |
| ChrC02            | 3                | 2           | 2          | 0          | 0           | 7              |  |  |  |
| ChrC03            | 5                | 3           | 6          | 1          | 3           | 18             |  |  |  |
| ChrC04            | 4                | 1           | 2          | 1          | 1           | 9              |  |  |  |
| ChrC05            | 4                | 0           | 1          | 4          | 0           | 9              |  |  |  |
| ChrC06            | 5                | 2           | 0          | 1          | 0           | 8              |  |  |  |
| ChrC07            | 4                | 0           | 2          | 0          | 1           | 7              |  |  |  |
| ChrC08            | 4                | 1           | 2          | 2          | 0           | 9              |  |  |  |
| ChrC09            | 3                | 1           | 0          | 2          | 3           | 9              |  |  |  |
| ChrCnn            | 9                | 2           | 5          | 4          | 5           | 25             |  |  |  |
| ChrUnn            | 0                | 0           | 0          | 0          | 0           | 0              |  |  |  |
| <b>Multi-copy</b> |                  |             |            |            |             |                |  |  |  |
| <b>Chromosome</b> | <b>AP2/EREBP</b> | <b>bZIP</b> | <b>MYB</b> | <b>NAC</b> | <b>WRKY</b> | <b>Row sum</b> |  |  |  |
| A01               | 16               | 7           | 26         | 19         | 9           | 77             |  |  |  |
| A02               | 29               | 9           | 35         | 24         | 15          | 112            |  |  |  |
| A03               | 32               | 11          | 52         | 26         | 25          | 146            |  |  |  |
| A04               | 10               | 9           | 9          | 5          | 13          | 46             |  |  |  |
| A05               | 16               | 10          | 29         | 19         | 10          | 84             |  |  |  |
| A06               | 14               | 15          | 25         | 13         | 9           | 76             |  |  |  |
| A07               | 26               | 4           | 30         | 18         | 8           | 86             |  |  |  |
| A08               | 20               | 7           | 19         | 8          | 7           | 61             |  |  |  |
| A09               | 30               | 20          | 37         | 23         | 17          | 127            |  |  |  |
| A10               | 17               | 7           | 24         | 20         | 3           | 71             |  |  |  |
| ChrA01            | 15               | 5           | 24         | 19         | 7           | 70             |  |  |  |
| ChrA02            | 26               | 8           | 27         | 15         | 9           | 85             |  |  |  |
| ChrA03            | 29               | 11          | 52         | 23         | 25          | 140            |  |  |  |
| ChrA04            | 9                | 7           | 9          | 5          | 14          | 44             |  |  |  |
| ChrA05            | 14               | 10          | 30         | 20         | 9           | 83             |  |  |  |
| ChrA06            | 13               | 14          | 26         | 13         | 7           | 73             |  |  |  |
| ChrA07            | 25               | 5           | 28         | 17         | 9           | 84             |  |  |  |
| ChrA08            | 16               | 7           | 22         | 9          | 7           | 61             |  |  |  |
| ChrA09            | 26               | 15          | 31         | 21         | 16          | 109            |  |  |  |
| ChrA10            | 16               | 9           | 26         | 16         | 4           | 71             |  |  |  |

|        |    |    |    |    |    |     |  |  |
|--------|----|----|----|----|----|-----|--|--|
| ChrAnn | 25 | 9  | 27 | 12 | 8  | 81  |  |  |
| C1     | 16 | 6  | 29 | 21 | 8  | 80  |  |  |
| C2     | 29 | 9  | 32 | 22 | 15 | 107 |  |  |
| C3     | 31 | 15 | 54 | 27 | 21 | 148 |  |  |
| C4     | 17 | 17 | 19 | 9  | 22 | 84  |  |  |
| C5     | 18 | 11 | 29 | 23 | 5  | 86  |  |  |
| C6     | 22 | 6  | 25 | 14 | 9  | 76  |  |  |
| C7     | 28 | 10 | 35 | 17 | 17 | 107 |  |  |
| C8     | 21 | 11 | 31 | 10 | 7  | 80  |  |  |
| C9     | 25 | 15 | 42 | 27 | 12 | 121 |  |  |
| ChrC01 | 10 | 6  | 17 | 14 | 9  | 56  |  |  |
| ChrC02 | 24 | 8  | 25 | 17 | 12 | 86  |  |  |
| ChrC03 | 26 | 12 | 47 | 24 | 19 | 128 |  |  |
| ChrC04 | 18 | 15 | 17 | 11 | 15 | 76  |  |  |
| ChrC05 | 18 | 9  | 28 | 23 | 7  | 85  |  |  |
| ChrC06 | 18 | 6  | 22 | 13 | 9  | 68  |  |  |
| ChrC07 | 24 | 8  | 31 | 16 | 17 | 96  |  |  |
| ChrC08 | 20 | 11 | 28 | 9  | 8  | 76  |  |  |
| ChrC09 | 22 | 14 | 36 | 16 | 8  | 96  |  |  |
| ChrCnn | 24 | 13 | 48 | 26 | 16 | 127 |  |  |
| ChrUnn | 1  | 2  | 1  | 0  | 0  | 4   |  |  |

**Novel genes in B. napus**

| BnAP2/EREBP   | BnbZIP        | BnMYB         | BnNAC         | BnWRKY        |  |  |  |  |
|---------------|---------------|---------------|---------------|---------------|--|--|--|--|
| BnaA01g00710D | BnaA02g27460D | BnaA01g16900D | BnaA01g31680D | BnaA02g19560D |  |  |  |  |
| BnaA01g23970D | BnaA04g20520D | BnaA01g21010D | BnaA03g33890D | BnaA04g23470D |  |  |  |  |
| BnaA03g46240D | BnaA04g27730D | BnaA01g21090D | BnaA03g33910D | BnaA06g16820D |  |  |  |  |
| BnaA04g19700D | BnaA08g04710D | BnaA01g23930D | BnaA04g10830D | BnaA06g28100D |  |  |  |  |
| BnaA05g11530D | BnaA09g36010D | BnaA03g01420D | BnaA06g23510D | BnaA09g11350D |  |  |  |  |
| BnaA07g06760D | BnaA09g36130D | BnaA03g12400D | BnaA09g19790D | BnaA09g21040D |  |  |  |  |
| BnaA07g08610D | BnaA10g28780D | BnaA03g26820D | BnaA09g19800D | BnaAnng30430D |  |  |  |  |
| BnaA07g23500D | BnaAnng33510D | BnaA03g32470D | BnaA09g51470D | BnaAnng39820D |  |  |  |  |
| BnaA08g08310D | BnaAnng36310D | BnaA03g34140D | BnaA10g10080D | BnaC02g32270D |  |  |  |  |
| BnaA08g11220D | BnaAnng39310D | BnaA04g09530D | BnaAnng34420D | BnaC03g49470D |  |  |  |  |
| BnaA08g22160D | BnaC01g02720D | BnaA05g00710D | BnaAnng41940D | BnaC03g67520D |  |  |  |  |
| BnaA08g30930D | BnaC03g25660D | BnaA05g29580D | BnaC01g02440D | BnaC04g05170D |  |  |  |  |
| BnaA09g28560D | BnaC03g59330D | BnaA06g03350D | BnaC01g40260D | BnaC04g14500D |  |  |  |  |
| BnaA09g44290D | BnaC04g44430D | BnaA06g05130D | BnaC02g10100D | BnaC04g36310D |  |  |  |  |
| BnaA10g04090D | BnaC05g35930D | BnaA06g11070D | BnaC02g10310D | BnaC04g40940D |  |  |  |  |
| BnaAnng07060D | BnaC06g02640D | BnaA06g12690D | BnaC03g03740D | BnaC06g13990D |  |  |  |  |
| BnaAnng21280D | BnaC06g15330D | BnaA06g21900D | BnaC03g31420D | BnaC08g29410D |  |  |  |  |
| BnaC01g03990D | BnaC08g29000D | BnaA06g25300D | BnaC03g53950D | BnaC08g35490D |  |  |  |  |
| BnaC01g05620D | BnaC08g40240D | BnaA06g29370D | BnaC03g54890D | BnaCnng77260D |  |  |  |  |
| BnaC02g24770D | BnaCnng20400D | BnaA07g02020D | BnaC04g01450D |               |  |  |  |  |
| BnaC03g25680D | BnaCnng21210D | BnaA07g36940D | BnaC04g11030D |               |  |  |  |  |
| BnaC03g58550D | BnaUnng03790D | BnaA07g36950D | BnaC05g00990D |               |  |  |  |  |
| BnaC03g66900D |               | BnaA08g22480D | BnaC05g01030D |               |  |  |  |  |
| BnaC04g47060D |               | BnaA09g44790D | BnaC06g13570D |               |  |  |  |  |
| BnaC05g12270D |               | BnaA10g25530D | BnaC08g07270D |               |  |  |  |  |
| BnaC06g33570D |               | BnaA10g29180D | BnaC08g43050D |               |  |  |  |  |
| BnaC06g37920D |               | BnaAnng06040D | BnaCnng38230D |               |  |  |  |  |
| BnaC08g08930D |               | BnaAnng25220D | BnaCnng69540D |               |  |  |  |  |
| BnaC09g43740D |               | BnaAnng41910D | BnaCnng72050D |               |  |  |  |  |
| BnaCnng05070D |               | BnaC02g05740D |               |               |  |  |  |  |
| BnaCnng07330D |               | BnaC02g16640D |               |               |  |  |  |  |
| BnaCnng47540D |               | BnaC02g38100D |               |               |  |  |  |  |
| BnaCnng73930D |               | BnaC02g38120D |               |               |  |  |  |  |
|               |               | BnaC02g39010D |               |               |  |  |  |  |
|               |               | BnaC03g15570D |               |               |  |  |  |  |
|               |               | BnaC03g65090D |               |               |  |  |  |  |
|               |               | BnaC04g27380D |               |               |  |  |  |  |
|               |               | BnaC04g32680D |               |               |  |  |  |  |
|               |               | BnaC04g41990D |               |               |  |  |  |  |
|               |               | BnaC04g52010D |               |               |  |  |  |  |
|               |               | BnaC04g54130D |               |               |  |  |  |  |
|               |               | BnaC05g06410D |               |               |  |  |  |  |
|               |               | BnaC05g35410D |               |               |  |  |  |  |
|               |               | BnaC05g39780D |               |               |  |  |  |  |
|               |               | BnaC05g50190D |               |               |  |  |  |  |
|               |               | BnaC06g02940D |               |               |  |  |  |  |
|               |               | BnaC06g23020D |               |               |  |  |  |  |
|               |               | BnaC07g27330D |               |               |  |  |  |  |
|               |               | BnaC08g17650D |               |               |  |  |  |  |
|               |               | BnaC08g18080D |               |               |  |  |  |  |
|               |               | BnaC08g26530D |               |               |  |  |  |  |
|               |               | BnaC09g01550D |               |               |  |  |  |  |
|               |               | BnaC09g05300D |               |               |  |  |  |  |
|               |               | BnaC09g50770D |               |               |  |  |  |  |



|                                    |               |               |               |              |  |  |  |  |  |
|------------------------------------|---------------|---------------|---------------|--------------|--|--|--|--|--|
| BnaCnng49280D                      |               |               |               |              |  |  |  |  |  |
| BnaCnng57070D                      |               |               |               |              |  |  |  |  |  |
| Lost genes from <i>B. rapa</i>     |               |               |               |              |  |  |  |  |  |
| BrAP2/EREBP                        | BrbZIP        | BrMYB         | BrNAC         | BrWRKY       |  |  |  |  |  |
| Bra023921                          | Bra029353     | Bra039065     | Bra033306     | Bra019123    |  |  |  |  |  |
| Bra011744                          | Bra034916     | Bra037837     |               | Bra013779    |  |  |  |  |  |
| Bra006325                          | Bra022225     | Bra009245     |               |              |  |  |  |  |  |
| Bra034624                          | Bra024310     | Bra015766     |               |              |  |  |  |  |  |
| Bra030458                          | Bra017316     | Bra016546     |               |              |  |  |  |  |  |
| Bra019086                          | Bra026523     | Bra009591     |               |              |  |  |  |  |  |
| Bra021047                          | Bra037374     | Bra020373     |               |              |  |  |  |  |  |
| Bra025719                          |               | Bra005997     |               |              |  |  |  |  |  |
| Bra026770                          |               |               |               |              |  |  |  |  |  |
| Bra020162                          |               |               |               |              |  |  |  |  |  |
| Bra016518                          |               |               |               |              |  |  |  |  |  |
| Bra003701                          |               |               |               |              |  |  |  |  |  |
| Lost genes from <i>B. oleracea</i> |               |               |               |              |  |  |  |  |  |
| BoAP2/EREBP                        | BobZIP        | BoMYB         | BoNAC         | BoWRKY       |  |  |  |  |  |
| Bo4g186300.1                       | Bo4g183320.1  | Bo4g101470.1  | Bo1g037810.1  | Bo6g066790.1 |  |  |  |  |  |
| Bo14558s010.1                      | Bo1g119430.1  | Bo8g104190.1  | Bo5g085430.1  | Bo7g088570.1 |  |  |  |  |  |
| Bo9g001020.1                       | Bo01108s040.1 | Bo00877s020.1 | Bo13819s010.1 | Bo2g137260.1 |  |  |  |  |  |
| Bo5g054550.1                       | Bo6g066380.1  | Bo2g149310.1  | Bo3g064460.1  | Bo3g184540.1 |  |  |  |  |  |
| Bo2g048150.1                       | Bo3g039150.1  | Bo4g176030.1  | Bo3g093950.1  |              |  |  |  |  |  |
| Bo5g020790.1                       |               | Bo24301s010.1 | Bo5g002880.1  |              |  |  |  |  |  |
| Bo7g111110.1                       |               | Bo4g101460.1  | Bo5g002950.1  |              |  |  |  |  |  |
| Bo1g007330.1                       |               | Bo5g021890.1  | Bo5g002890.1  |              |  |  |  |  |  |
| Bo3g100470.1                       |               | Bo6g099880.1  | Bo6g066300.1  |              |  |  |  |  |  |
| Bo6g073020.1                       |               | Bo4g140330.1  | Bo7g030700.1  |              |  |  |  |  |  |
| Bo11579s010.1                      |               | Bo7g085920.1  | Bo2g027150.1  |              |  |  |  |  |  |
| Bo3g185040.1                       |               | Bo2g167960.1  | Bo5g086900.1  |              |  |  |  |  |  |
| Bo9g166320.1                       |               | Bo3g002620.1  | Bo2g130240.1  |              |  |  |  |  |  |
|                                    |               | Bo03161s010.1 | Bo2g027170.1  |              |  |  |  |  |  |
|                                    |               | Bo4g030640.1  | Bo2g070830.1  |              |  |  |  |  |  |
|                                    |               | Bo3g017760.1  | Bo9g122170.1  |              |  |  |  |  |  |
