# Supplementary material for: Exploring transcription factors reveals crucial members and regulatory networks involved in different abiotic stresses in Brassica napus L
Source: PubMed Central journal article supplement (PMC6146658; doi:10.1186/s12870-018-1417-z), 2018-09-19
Supplement: 12870_2018_1417_MOESM5_ESM.pdf [file 12870_2018_1417_MOESM5_ESM.pdf]

|         |               |            |             |              |            |              |             |            |            |            |            |
|---------|---------------|------------|-------------|--------------|------------|--------------|-------------|------------|------------|------------|------------|
| BnNACs  | BnaA02g01460D | 0.3448047  | 0.39804977  | 0.38355127   | 0.3943781  | 1.376084774  | 0.717141763 | 0.00560271 | 0.22984915 | 0.39886204 | 0.41682298 |
| BnWRKYs | BnaC03g21360D | 1.40348621 | 0.685941298 | 2.151133254  | 0.75980794 | 0.29339319   | 0.350934781 | -0.9017492 | 0.57468562 | 0.09775082 | 0.27265622 |
| BnWRKYs | BnaC04g41050D | 1.99500179 | 0.667049738 | 3.567753211  | 0.80674073 | 0.133350387  | 0.24909516  | 0.49678669 | 0.36405826 | 0.73468285 | 0.40517894 |
| BnWRKYs | BnaCmg66020D  | 2.30102632 | 0.650298091 | 2.437709326  | 0.64020175 | -0.597367522 | 0.303169802 | -1.6820299 | 0.42874661 | -1.3194598 | 0.38510955 |
| BnWRKYs | BnaC04g06800D | 3.68642049 | 0.810551622 | 4.414328859  | 0.85050988 | -0.703018262 | 0.32811124  | -0.0848889 | 0.24530188 | -0.1069152 | 0.24998899 |
| BnWRKYs | BnaC01g18810D | -0.0590106 | 0.249920744 | -1.480495298 | 0.60310552 | 0.354125011  | 0.375369862 | -0.0572573 | 0.25727394 | 0.16379943 | 0.299775   |
| BnWRKYs | BnaC05g10200D | 0.99258676 | 0.518671404 | 1.589337622  | 0.62129918 | -0.800797206 | 0.421673007 | -0.3836144 | 0.34726258 | 0.13929495 | 0.27428317 |
| BnWRKYs | BnaA05g12160D | 0.12909673 | 0.276370249 | 1.813859838  | 0.69698871 | -0.217743062 | 0.300459685 | -0.4562917 | 0.40634577 | 0.1793116  | 0.29805558 |
| BnWRKYs | BnaA03g17820D | 0.70446295 | 0.460640565 | 1.95894984   | 0.70301437 | 0.138368968  | 0.269041266 | -0.7694682 | 0.47438709 | -0.1933254 | 0.29415663 |
| BnWRKYs | BnaA06g08890D | 1.04750767 | 0.581411374 | 2.056996277  | 0.73142767 | -0.240845487 | 0.309294533 | -0.0856751 | 0.2666812  | 0.10768164 | 0.27172937 |
| BnWRKYs | BnaA04g22040D | 2.50200971 | 0.612939871 | 2.990587676  | 0.64934482 | -1.284881108 | 0.326693438 | -1.0595888 | 0.33265305 | -0.9427751 | 0.31541706 |
| BnWRKYs | BnaC03g16740D | 2.42844175 | 0.586237187 | 3.64160608   | 0.71858819 | -1.566346823 | 0.329625911 | -2.4088055 | 0.37971794 | -0.4854268 | 0.27638126 |
| BnWRKYs | BnaC02g01720D | 0.94404359 | 0.364401705 | 3.649490502  | 0.7388315  | 0.470791481  | 0.280991317 | 0.39530128 | 0.28424082 | 1.12389647 | 0.39962662 |
| BnWRKYs | BnaA04g17420D | 1.21674586 | 0.448036652 | 4.007377733  | 0.80342078 | 0.238404739  | 0.255307954 | 0.17492568 | 0.25918269 | -0.2318157 | 0.26578516 |
| BnWRKYs | BnaA03g13820D | 2.94394419 | 0.568263676 | 4.600275556  | 0.75959659 | -0.965234582 | 0.262445401 | -0.0356239 | 0.22858105 | 0.2274105  | 0.24937256 |
| BnWRKYs | BnaC09g13680D | 1.60319434 | 0.663582285 | 2.41666613   | 0.74597335 | 0.664793524  | 0.440923421 | 0.47566833 | 0.40555981 | 0.94312674 | 0.51930986 |
| BnWRKYs | BnaC02g26030D | 3.92286123 | 0.84901062  | 3.259721672  | 0.78668895 | -0.002649578 | 0.21244364  | -0.0622064 | 0.24374097 | -0.3896727 | 0.31314946 |
| BnWRKYs | BnaA06g23990D | 4.6206714  | 0.824472067 | 4.656347134  | 0.81445498 | 0.913843356  | 0.32867704  | -0.3670575 | 0.26224946 | 0.52083216 | 0.28769726 |
| BnWRKYs | BnaA07g35260D | 6.290791   | 0.949762672 | 4.195475295  | 0.83834628 | -0.117753531 | 0.240438638 | -0.6125182 | 0.340211   | -0.7176003 | 0.34173227 |
| BnWRKYs | BnaA09g13370D | 1.18422366 | 0.591527528 | 2.180073609  | 0.72763438 | 0.42722804   | 0.370768608 | 0.27158899 | 0.33474893 | 0.35347317 | 0.34619043 |
| BnWRKYs | BnaC03g67380D | -1.9292767 | 0.516181444 | -3.654416835 | 0.56074976 | -2.246758866 | 0.538798038 | -3.1193796 | 0.60445287 | -1.7377452 | 0.50718368 |
| BnWRKYs | BnaC07g27240D | 1.66124609 | 0.511412871 | 2.50326814   | 0.61418155 | -0.448052557 | 0.272590176 | -0.1368509 | 0.2500044  | -1.3284709 | 0.35974982 |
| BnWRKYs | BnaC02g40180D | 1.77760758 | 0.479184279 | 2.99138687   | 0.62791926 | -0.485426827 | 0.260001673 | -0.4717519 | 0.27443288 | 0.95007477 | 0.35050988 |
| BnWRKYs | BnaC04g14500D | 1.11703942 | 0.410365811 | 3.838937567  | 0.7733299  | -1.449307401 | 0.353757177 | -0.0067892 | 0.22393577 | 0.37381484 | 0.28426283 |
| BnWRKYs | BnaC03g67520D | 2.19924558 | 0.662965849 | 2.321143808  | 0.65076702 | -0.035721922 | 0.220651044 | 0.29342167 | 0.29400252 | -0.0972972 | 0.24868787 |
| BnWRKYs | BnaA04g13570D | 0.87034568 | 0.541660062 | 1.834777618  | 0.71098181 | 0.040992571  | 0.231240533 | -1.1378006 | 0.60303727 | -0.2358199 | 0.32008877 |
| BnWRKYs | BnaC04g35770D | 1.21447855 | 0.579172391 | 1.901196988  | 0.67514927 | 0.227344726  | 0.292239071 | -0.711929  | 0.43497041 | -0.0778271 | 0.2525428  |
| BnWRKYs | BnaA08g12420D | 1.07091724 | 0.56453644  | 2.157966049  | 0.72629804 | -1.289643515 | 0.539920832 | -0.5954729 | 0.42875321 | -0.5769765 | 0.39688568 |
| BnWRKYs | BnaA03g46550D | 0.06370284 | 0.245378932 | 0.587418152  | 0.40359822 | -0.152822574 | 0.270137641 | -1.6503222 | 0.61551129 | -0.4744092 | 0.36921211 |
| BnWRKYs | BnaC06g15910D | 1.27076163 | 0.642339462 | -0.010279592 | 0.22960257 | -1.073544485 | 0.551183997 | -0.6095974 | 0.46720781 | 0.63071694 | 0.46373816 |
| BnWRKYs | BnaA07g16850D | 1.31782423 | 0.677000775 | 0.309393416  | 0.35036678 | -1.167714687 | 0.613926169 | -0.4048286 | 0.42183152 | 0.0739773  | 0.2600347  |
| BnWRKYs | BnaC02g09670D | 1.48330952 | 0.625394079 | -1.097297201 | 0.44149803 | -1.112286376 | 0.474902251 | -1.4889158 | 0.5511884  | 0.08787276 | 0.25527273 |
| BnWRKYs | BnaA01g13440D | 1.70159304 | 0.733699672 | -0.23672179  | 0.31567685 | -0.815153293 | 0.518173853 | -1.7842096 | 0.71020025 | -1.7096351 | 0.6695485  |
| BnWRKYs | BnaC01g15640D | 2.18465538 | 0.762890116 | -0.056709442 | 0.24540755 | -0.206047383 | 0.293553401 | -1.2754688 | 0.58815034 | -1.8215896 | 0.61518326 |
| BnWRKYs | BnaCmg52600D  | 2.59735905 | 0.804902427 | -0.741171705 | 0.43221186 | -2.663565135 | 0.689448378 | -1.4105445 | 0.62210495 | -0.8375945 | 0.47909622 |
| BnWRKYs | BnaA03g46280D | 2.62385151 | 0.673575152 | -1.407175382 | 0.35238781 | 0.219009782  | 0.251149213 | -0.2442368 | 0.26594588 | -0.2442368 | 0.26604495 |
| BnWRKYs | BnaA04g02560D | 2.99794341 | 0.831996988 | -4.035788329 | 0.72362535 | -2.069896183 | 0.666508155 | -1.1866683 | 0.6012496  | -0.1324977 | 0.28046735 |
| BnWRKYs | BnaC07g30300D | 3.68345236 | 0.68361205  | -0.690671942 | 0.26310587 | -2.353636955 | 0.309512487 | -2.2756344 | 0.32353861 | -0.2947433 | 0.2525384  |
| BnWRKYs | BnaC08g27340D | -0.1950884 | 0.327164571 | -1.044346651 | 0.59420022 | -1.095770152 | 0.648237434 | 0.13805579 | 0.31395743 | 0.19124405 | 0.32539232 |
