# Supplementary material for: Exploring transcription factors reveals crucial members and regulatory networks involved in different abiotic stresses in Brassica napus L
Source: PubMed Central journal article supplement (PMC6146658; doi:10.1186/s12870-018-1417-z), 2018-09-19
Supplement: 12870_2018_1417_MOESM6_ESM.pdf [file 12870_2018_1417_MOESM6_ESM.pdf]

**Additional file 6 The153 Common DEGs**

| 153 Common DEGs | Family     | group  | chromosome | Homologous genes                | Response        |
|-----------------|------------|--------|------------|---------------------------------|-----------------|
| BnaA01g02720D   | AP2/EREBPs | ERFB3  | A01        | AT4G344100                      | Heat            |
| BnaA01g13420D   | AP2/EREBPs | ERFB5  | A01        | AT4G237500                      | Heat; salt      |
| BnaA01g27570D   | AP2/EREBPs | ERFB2  | A01        | AT3G167700                      | Heat            |
| BnaA02g18720D   | AP2/EREBPs | DREBA6 | A02        | AT1G780800                      | Heat            |
| BnaA03g04290D   | AP2/EREBPs | ERFB4  | A03        | AT5G133300                      | Cold; heat      |
| BnaA03g33790D   | AP2/EREBPs | ERFB1  | A03        | AT3G152100                      | Cold; heat      |
| BnaA05g23130D   | AP2/EREBPs | ERFB2  | A05        | AT3G167700                      | Heat            |
| BnaA06g40170D   | AP2/EREBPs | ERFB3  | A06        | AT5G472300                      | Heat            |
| BnaA07g08440D   | AP2/EREBPs | ERFB1  | A07        | AT1G03800; AT5G44210; AT1G80580 | Heat            |
| BnaA07g13990D   | AP2/EREBPs | AP2    | A07        | AT2G285500                      | Cold; heat      |
| BnaA09g30810D   | AP2/EREBPs | DREBA6 | A09        | AT1G221900                      | Heat            |
| BnaA10g25000D   | AP2/EREBPs | DREBA2 | A10        | AT2G403500                      | Heat            |
| BnaAnng21280D   | AP2/EREBPs | ERFB3  | Ann        | AT2G44840; AT3G232300           | Heat            |
| BnaC01g10100D   | AP2/EREBPs | ERFB3  | C01        | AT4G17500; AT2G44840; AT3G23230 | Heat            |
| BnaC03g05820D   | AP2/EREBPs | ERFB4  | C03        | AT5G133300                      | Cold; heat      |
| BnaC03g39000D   | AP2/EREBPs | ERFB1  | C03        | AT3G152100                      | Cold; heat      |
| BnaC05g17550D   | AP2/EREBPs | DREBA6 | C05        | AT1G221900                      | Heat            |
| BnaC05g38410D   | AP2/EREBPs | ERFB1  | C05        | AT3G152100                      | Cold; heat      |
| BnaC05g42130D   | AP2/EREBPs | DREBA2 | C05        | AT3G110200                      | Cold; heat      |
| BnaC07g45030D   | AP2/EREBPs | ERFB3  | C07        | AT4G344100                      | Heat            |
| BnaC09g49920D   | AP2/EREBPs | DREBA2 | C09        | AT2G403500                      | Heat            |
| BnaCnng67070D   | AP2/EREBPs | ERFB1  | Cnn        | AT1G03800; AT5G44210; AT1G80580 | Heat            |
| BnaC07g27220D   | BnbZIPs    | VIII   | C07        | AT5G494500                      | Cold; heat      |
| BnaA06g29500D   | BnbZIPs    | VIII   | A06        | AT5G494500                      | Cold; heat      |
| BnaA06g29270D   | BnbZIPs    | VII    | A06        | AT5G287700                      | Cold            |
| BnaC07g27440D   | BnbZIPs    | VII    | C07        | AT5G287700                      | Cold            |
| BnaA01g27940D   | BnbZIPs    | III    | A01        | AT3G176090                      | Cold; heat      |
| BnaA02g02830D   | BnbZIPs    | XII    | A02        | AT5G158300                      | Heat            |
| BnaC02g06270D   | BnbZIPs    | XII    | C02        | AT5G158300                      | Heat            |
| BnaA03g34610D   | BnbZIPs    | III    | A03        | AT3G176090                      | Heat            |
| BnaA05g22650D   | BnbZIPs    | III    | A05        | AT3G176090                      | Heat            |
| BnaA04g05810D   | BnbZIPs    | I      | A04        | AT3G519600                      | Heat            |
| BnaCnng20200D   | BnbZIPs    | III    | Cnn        | AT5G112600                      | Heat            |
| BnaC09g45380D   | BnbZIPs    | III    | C09        | AT5G112600                      | Heat            |
| BnaC05g51490D   | BnbZIPs    | III    | C05        | AT1G437000                      | Heat            |
| BnaA09g39870D   | BnbZIPs    | X      | A09        | AT3G624200                      | Heat            |
| BnaC08g32220D   | BnbZIPs    | X      | C08        | AT3G624200                      | Heat            |
| BnaA05g01520D   | BnbZIPs    | VII    | A05        | AT2G462700                      | Heat; salt; ABA |
| BnaA01g31420D   | BnbZIPs    | III    | A01        | AT3G108000                      | Heat            |
| BnaA09g00170D   | BnbZIPs    | VII    | A09        | AT4G011200                      | Heat; drought   |
| BnaAnng39310D   | BnbZIPs    | III    | Ann        | AT1G437000                      | Heat            |
| BnaC04g33670D   | BnbZIPs    | III    | C04        | AT2G212300                      | Heat            |
| BnaC04g01070D   | BnbZIPs    | VII    | C04        | AT2G462700                      | Heat; salt; ABA |
| BnaA05g08020D   | BnbZIPs    | V      | A05        | AT2G362700                      | Heat            |
| BnaAnng26550D   | BnbZIPs    | V      | Ann        | AT4G340000                      | Heat; salt; ABA |
| BnaC06g18530D   | BnbZIPs    | X      | C06        | AT3G624200                      | Heat            |
| BnaA07g19330D   | BnbZIPs    | X      | A07        | AT3G624200                      | Heat            |
| BnaC07g44670D   | BnbZIPs    | V      | C07        | AT4G340000                      | Heat; salt; ABA |
| BnaA01g02570D   | BnbZIPs    | X      | A01        | AT4G345900                      | ABA             |
| BnaC01g03810D   | BnbZIPs    | X      | C01        | AT4G345900                      | ABA             |
| BnaA01g26200D   | BnbZIPs    | V      | A01        | AT3G192900                      | ABA             |
| BnaC03g03620D   | BnMYBs     | R2R3   | C03        | AT5G08490; AT5G08510; AT5G08520 | Cold            |
| BnaA01g00670D   | BnMYBs     | R2R3   | A01        | AT4G372600                      | Cold            |
| BnaC07g13600D   | BnMYBs     | R2R3   | C07        | AT1G226400                      | Cold; heat      |
| BnaC01g01660D   | BnMYBs     | R2R3   | C01        | AT4G372600                      | Cold            |
| BnaC05g43350D   | BnMYBs     | 1R     | C05        | AT3G096000                      | Cold; heat      |
| BnaA01g32200D   | BnMYBs     | 1R     | A01        | AT3G09600; AT5G576500           | Cold; heat      |
| BnaA06g12480D   | BnMYBs     | 1R     | A06        | AT1G18330; AT3G101130           | Cold            |
| BnaA05g28870D   | BnMYBs     | 1R     | A05        | AT3G096000                      | Cold; heat      |
| BnaA07g10350D   | BnMYBs     | R2R3   | A07        | AT1G226400                      | Cold; heat      |
| BnaC09g40660D   | BnMYBs     | 1R     | C09        | AT5G173000                      | Cold; heat      |
| BnaC07g45320D   | BnMYBs     | R2R3   | C07        | AT4G349900                      | Cold            |
| BnaA05g01050D   | BnMYBs     | 1R     | A05        | AT2G468300                      | Cold; heat      |
| BnaC02g07210D   | BnMYBs     | 1R     | C02        | AT5G173000                      | Cold; heat      |

|               |        |      |     |                                         |                    |
|---------------|--------|------|-----|-----------------------------------------|--------------------|
| BnaAnng35540D | BnMYBs | 1R   | Ann | AT3G163500                              | Cold               |
| BnaC05g00840D | BnMYBs | 1R   | C05 | AT1G010600                              | Cold;heat          |
| BnaA10g00430D | BnMYBs | 1R   | A10 | AT1G015200                              | Cold;ABA           |
| BnaC01g00270D | BnMYBs | 1R   | C01 | AT4G392500                              | Cold               |
| BnaC04g00590D | BnMYBs | 1R   | C04 | AT2G468300                              | Cold;heat          |
| BnaC05g00500D | BnMYBs | 1R   | C05 | AT1G015200                              | Cold;ABA           |
| BnaCnng76050D | BnMYBs | R2R3 | Cnn | AT2G167200                              | Cold               |
| BnaA03g29470D | BnMYBs | 1R   | A03 | AT3G06490;AT1G48000;AT5G49620           | Cold               |
| BnaC01g03510D | BnMYBs | R2R3 | C01 | AT4G349900                              | Cold               |
| BnaA03g06490D | BnMYBs | 1R   | A03 | AT5G173000                              | Cold;heat          |
| BnaA03g53110D | BnMYBs | R2R3 | A03 | AT4G349900                              | Cold               |
| BnaCnng65380D | BnMYBs | 1R   | Cnn | AT5G076900                              | Heat               |
| BnaAnng17890D | BnMYBs | 1R   | Ann | AT1G010600                              | Heat               |
| BnaA03g00640D | BnMYBs | 1R   | A03 | AT3G09600;AT1G01520;AT5G02840;AT5G57650 | Heat               |
| BnaA10g00780D | BnMYBs | 1R   | A10 | AT1G010600                              | Heat               |
| BnaC09g41280D | BnMYBs | R2R3 | C09 | AT5G166000                              | Heat               |
| BnaA10g17370D | BnMYBs | 1R   | A10 | AT5G173000                              | Heat               |
| BnaA10g17890D | BnMYBs | R2R3 | A10 | AT5G166000                              | Heat               |
| BnaC03g60080D | BnMYBs | R2R3 | C03 | AT4G386200                              | Heat               |
| BnaA10g24770D | BnMYBs | R2R3 | A10 | AT5G057900                              | Heat               |
| BnaA08g16990D | BnMYBs | R2R3 | A08 | AT4G386200                              | Heat;ABA           |
| BnaA10g26900D | BnMYBs | 1R   | A10 | AT5G028400                              | Heat               |
| BnaC05g14070D | BnMYBs | 1R   | C05 | AT1G18330;AT3G101130                    | Heat               |
| BnaC05g17910D | BnMYBs | R2R3 | C05 | AT1G226400                              | Heat;ABA           |
| BnaA03g42350D | BnMYBs | 1R   | A03 | AT3G168570                              | Heat               |
| BnaA06g05610D | BnMYBs | 1R   | A06 | AT1G097100                              | Heat               |
| BnaA09g30490D | BnMYBs | R2R3 | A09 | AT1G226400                              | Heat;ABA           |
| BnaA07g29070D | BnMYBs | 1R   | A07 | AT1G710300                              | Heat;ABA           |
| BnaA03g24010D | BnMYBs | R2R3 | A03 | AT4G094600                              | Heat               |
| BnaA03g01420D | BnMYBs | R2R3 | A03 | AT5G04760;AT3G105800                    | Heat               |
| BnaAnng01040D | BnMYBs | 1R   | Ann | AT5G04760;AT3G105800                    | Heat               |
| BnaC03g28550D | BnMYBs | R2R3 | C03 | AT4G094600                              | Heat               |
| BnaA07g24010D | BnMYBs | 1R   | A07 | AT1G700000                              | Heat               |
| BnaC03g01730D | BnMYBs | R2R3 | C03 | AT5G047600                              | Heat               |
| BnaC02g02590D | BnMYBs | 1R   | C02 | AT3G10580;AT5G047600                    | Heat               |
| BnaA08g22580D | BnMYBs | R2R3 | A08 | AT1G185700                              | ABA                |
| BnaC09g05650D | BnMYBs | R2R3 | C09 | AT5G624700                              | ABA                |
| BnaC09g43890D | BnNACs | VI   | C09 | AT5G131800                              | Cold               |
| BnaA07g24270D | BnNACs | VI   | A07 | AT1G694900                              | Cold               |
| BnaA10g20110D | BnNACs | VI   | A10 | AT5G131800                              | Cold;heat          |
| BnaC03g03740D | BnNACs | VI   | C03 | AT5G63790;AT5G087900                    | Cold;heat          |
| BnaC05g20530D | BnNACs | III  | C05 | AT1G255800                              | Cold               |
| BnaA03g48570D | BnNACs | VI   | A03 | AT4G274100                              | Cold;heat;salt;ABA |
| BnaC02g42720D | BnNACs | VI   | C02 | AT5G637900                              | Cold;heat;salt     |
| BnaC07g40860D | BnNACs | VI   | C07 | AT4G274100                              | Cold;heat;ABA      |
| BnaA02g33910D | BnNACs | VI   | A02 | AT5G637900                              | Cold;heat;salt     |
| BnaC02g00990D | BnNACs | VI   | C02 | AT5G63790;AT5G087900                    | Cold;heat;drought  |
| BnaC05g00370D | BnNACs | VI   | C05 | AT1G017200                              | Cold;heat          |
| BnaCnng64100D | BnNACs | VI   | Cnn | AT1G528800                              | Cold               |
| BnaAnng05950D | BnNACs | VI   | Ann | AT5G63790;AT5G08790;AT1G01720           | Cold;heat          |
| BnaA10g22680D | BnNACs | VI   | A10 | AT5G087900                              | Cold;heat          |
| BnaC07g13550D | BnNACs | VIII | C07 | AT1G328700                              | Cold;heat          |
| BnaC09g47250D | BnNACs | VI   | C09 | AT5G087900                              | Cold;heat          |
| BnaA07g10300D | BnNACs | VIII | A07 | AT1G328700                              | Cold;heat          |
| BnaC03g50570D | BnNACs | VI   | C03 | AT5G63790;AT1G017200                    | Heat;drought;salt  |
| BnaA09g04810D | BnNACs | VII  | A09 | AT3G49530;AT5G245900                    | Heat               |
| BnaC09g04330D | BnNACs | VII  | C09 | AT3G49530;AT5G245900                    | Heat               |
| BnaC08g21160D | BnNACs | VII  | C08 | AT3G49530;AT5G245900                    | Heat               |
| BnaC09g50530D | BnNACs | VIII | C09 | AT3G10500;AT5G044100                    | Heat               |
| BnaC03g71220D | BnNACs | VIII | C03 | AT3G10500;AT5G044100                    | Heat               |
| BnaC04g31690D | BnNACs | IX   | C04 | AT5G396100                              | Heat;ABA           |
| BnaA06g21090D | BnNACs | VII  | A06 | AT3G49530;AT5G245900                    | Heat               |
| BnaA10g00280D | BnNACs | VI   | A10 | AT1G017200                              | Heat;salt          |
| BnaC01g40260D | BnNACs | IX   | C01 | AT5G18270;AT3G040600                    | Heat               |
| BnaC03g52400D | BnNACs | VII  | C03 | AT3G49530;AT5G245900                    | Heat               |
| BnaA03g02640D | BnNACs | VI   | A03 | AT5G087900                              | Heat               |

|               |         |     |     |                                             |              |
|---------------|---------|-----|-----|---------------------------------------------|--------------|
| BnaA05g24050D | BnNACs  | VI  | A05 | AT3G155000                                  | Heat         |
| BnaC05g38150D | BnNACs  | VI  | C05 | AT3G155000                                  | Heat         |
| BnaC03g21360D | BnWRKYs | I   | C03 | AT2G384700                                  | Cold;heat    |
| BnaC04g41050D | BnWRKYs | I   | C04 | AT2G302500                                  | Cold;heat    |
| BnaC04g06800D | BnWRKYs | I   | C04 | AT2G384700                                  | Cold;heat    |
| BnaC05g10200D | BnWRKYs | I   | C05 | AT1G139600;AT2G033400                       | Heat         |
| BnaA05g12160D | BnWRKYs | I   | A05 | AT2G302500                                  | Heat         |
| BnaA03g17820D | BnWRKYs | I   | A03 | AT2G384700                                  | Heat         |
| BnaA06g08890D | BnWRKYs | I   | A06 | AT1G139600                                  | Heat         |
| BnaC02g01720D | BnWRKYs | I   | C02 | AT5G071000                                  | Heat         |
| BnaA04g17420D | BnWRKYs | I   | A04 | AT2G302500                                  | Heat         |
| BnaA03g13820D | BnWRKYs | I   | A03 | AT2G302500                                  | Heat         |
| BnaC09g13680D | BnWRKYs | IIb | C09 | AT1G623000                                  | Cold;heat    |
| BnaC02g26030D | BnWRKYs | IIb | C02 | AT1G808400                                  | Cold;heat    |
| BnaA09g13370D | BnWRKYs | IIb | A09 | AT1G623000                                  | Heat         |
| BnaC02g40180D | BnWRKYs | IIc | C02 | AT5G261700                                  | Heat         |
| BnaC04g14500D | BnWRKYs | IIc | C04 | AT2G302500                                  | Heat         |
| BnaC03g67520D | BnWRKYs | IId | C03 | AT2G245700;AT4G315500;AT4G242400;AT2G233200 | Cold;heat    |
| BnaA04g13570D | BnWRKYs | IId | A04 | AT2G233200                                  | Heat;ABA     |
| BnaC04g35770D | BnWRKYs | IId | C04 | AT2G233200                                  | Heat         |
| BnaA08g12420D | BnWRKYs | IId | A08 | AT4G315500;AT2G245700;AT4G242400            | Heat         |
| BnaC06g15910D | BnWRKYs | III | C06 | AT3G564000                                  | Cold         |
| BnaA07g16850D | BnWRKYs | III | A07 | AT3G564000                                  | Cold;drought |
