# Supplementary material for: Exploring transcription factors reveals crucial members and regulatory networks involved in different abiotic stresses in Brassica napus L
Source: BMC Plant Biol. 2018 Sep 19;18:202. doi: 10.1186/s12870-018-1417-z (PMC6146658; doi:10.1186/s12870-018-1417-z)
Supplement: Supplementary file 4 — Responsive genes of the five TF families. (PDF 531 kb) [file 12870_2018_1417_MOESM4_ESM.pdf]

| Additional file 4 Responsive TFs |                           |             |                           |            |                              |             |                           |             |                          |             |  |  |
|----------------------------------|---------------------------|-------------|---------------------------|------------|------------------------------|-------------|---------------------------|-------------|--------------------------|-------------|--|--|
| BnAP2/EREBP                      | log2 (Cold/Control) Prob. |             | log2 (Heat/Control) Prob. |            | log2 (Drought/Control) Prob. |             | log2 (Salt/Control) Prob. |             | log2 (ABA/Control) Prob. |             |  |  |
| Gene ID                          |                           |             |                           |            |                              |             |                           |             |                          |             |  |  |
| BnaA01g00290D                    | -0.132938832              | 0.265694899 | -2.914530658              | 0.5804383  | 0.069421401                  | 0.237816584 | -1.458585215              | 0.5190897   | 1.180120769              | 0.518545916 |  |  |
| BnaA01g00710D                    | 1.770531022               | 0.730952129 | 1.752480589               | 0.7003747  | 0.649428116                  | 0.480742981 | 0.386789866               | 0.532627074 | 0.38592828               | 0.385926327 |  |  |
| BnaA01g02720D                    |                           | 0           | 7.21916852                | 0.6206849  | 0                            | 0.21244364  | 0                         | 0.226982722 | 0                        | 0.223935767 |  |  |
| BnaA01g04150D                    | 0.060372618               | 0.230703353 | 1.975125331               | 0.4506543  | 0.289506617                  | 0.244749287 | -1.8259706                | 0.328608792 | 1.664910657              | 0.495957399 |  |  |
| BnaA01g05760D                    | -0.994946772              | 0.412404452 | 0.386278506               | 0.3115687  | -0.547487795                 | 0.337870742 | -0.373458396              | 0.31152471  | 0.545621609              | 0.387559882 |  |  |
| BnaA01g06090D                    | -1.034885518              | 0.35787629  | -1.83720485               | 0.3922602  | -0.760128627                 | 0.321982106 | -0.77690434               | 0.333430202 | -1.161333853             | 0.389596323 |  |  |
| BnaA01g13420D                    | -0.790126735              | 0.443818468 | -2.810945206              | 0.6258322  | -0.434693596                 | 0.357942337 | -1.879657956              | 0.604479288 | -0.958760503             | 0.515082867 |  |  |
| BnaA01g16910D                    |                           | 0.22451918  | 5.984893108               | 0.4734955  | 0                            | 0.21244364  | 0                         | 0.226982722 | 0                        | 0.223935767 |  |  |
| BnaA01g18170D                    | -2.736965594              | 0.4233594   | -1.884522783              | 0.373263   | -1.024247546                 | 0.336076473 | -0.658963082              | 0.30909199  | -0.138706271             | 0.250004403 |  |  |
| BnaA01g23940D                    | -0.061400545              | 0.239967505 | 0.043272708               | 0.2345847  | 0.329307625                  | 0.307458435 | 0.198413558               | 0.283760876 | -0.859137464             | 0.424570256 |  |  |
| BnaA01g27570D                    | -0.162402043              | 0.29647927  | 1.658222345               | 0.7000907  | 0.257538418                  | 0.336367079 | 0.397792553               | 0.394519004 | 0.4533348                | 0.449205678 |  |  |
| BnaA01g28970D                    | 2.433594297               | 0.736658565 | 1.94444852                | 0.6427181  | 0.265481726                  | 0.288637324 | 1.444434886               | 0.588764574 | 2.155977884              | 0.738813889 |  |  |
| BnaA01g29490D                    | -0.715779618              | 0.546538712 | 0.286325084               | 0.3645646  | -0.360021028                 | 0.411794621 | -0.04741338               | 0.25313942  | 0.532041143              | 0.528778752 |  |  |
| BnaA01g31290D                    | 2.217230716               | 0.316404688 | 6.303780748               | 0.7869113  | -2.736965594                 | 0.243100321 | 2.666756592               | 0.356026982 | 0.887525271              | 0.252635264 |  |  |
| BnaA01g34730D                    | 0.462062834               | 0.300741484 | -0.114511881              | 0.2424068  | 0.63991091                   | 0.326567949 | -0.382573104              | 0.281218077 | 1.234754922              | 0.477412026 |  |  |
| BnaA01g34910D                    |                           | 0.22451918  | 0                         | 0.2263112  | 4.984893108                  | 0.377943482 | 2.321928095               | 0.249922946 | 3.415037499              | 0.281841118 |  |  |
| BnaA02g00560D                    | -2.032421478              | 0.271339691 | -3.906890396              | 0.3001427  | 0.03170886                   | 0.21244364  | -3.906890396              | 0.310144334 | -1.321928095             | 0.264957378 |  |  |
| BnaA02g01080D                    | -2.218834602              | 0.514420198 | -2.94753258               | 0.5157764  | -0.73695594                  | 0.367206488 | -4.321928095              | 0.599182342 | -0.833641614             | 0.40593848  |  |  |
| BnaA02g01570D                    | -0.983880335              | 0.28003364  | 0.265733555               | 0.2462309  | -0.431339312                 | 0.243657314 | -4.89077093               | 0.384616401 | -4.89077093              | 0.389404787 |  |  |
| BnaA02g01920D                    |                           | 0.22451918  | 0                         | 0.2263112  | 0                            | 0.21244364  | 0                         | 0.226982722 | 3.36923381               | 0.277510656 |  |  |
| BnaA02g03590D                    | -1.874469118              | 0.241154144 | -0.137503524              | 0.2263112  | -1.874469118                 | 0.229217302 | -1.874469118              | 0.244405844 | -1.874469118             | 0.242076597 |  |  |
| BnaA02g04480D                    | 7.372139541               | 0.664275776 | 5.392317423               | 0.4136968  | 0                            | 0.21244364  | 0                         | 0.226982722 | 0                        | 0.223935767 |  |  |
| BnaA02g06490D                    | -0.119716421              | 0.279518475 | -1.52498684               | 0.2462309  | 0.331485848                  | 0.371675649 | 0.257961745               | 0.342643718 | 0.102160107              | 0.281592342 |  |  |
| BnaA02g08130D                    | 0.341556902               | 0.287157878 | -0.434937057              | 0.281064   | -0.265012055                 | 0.258319684 | -0.867896464              | 0.341881979 | -0.319459839             | 0.281002325 |  |  |
| BnaA02g10340D                    | 2.352381891               | 0.473671581 | 1.970853654               | 0.3987592  | 1.27897595                   | 0.331679964 | -1.906890396              | 0.298354997 | -1.836501268             | 0.300990967 |  |  |
| BnaA02g11090D                    | -1.528006616              | 0.443842686 | -1.909313258              | 0.4430017  | -2.234275413                 | 0.489731938 | -1.792903766              | 0.468332805 | -2.826851098             | 0.544130209 |  |  |
| BnaA02g13950D                    | 0.06963948                | 0.423850347 | -0.210035215              | 0.2579608  | -0.345387068                 | 0.272141058 | -1.037719666              | 0.366209183 | -0.548203951             | 0.318670964 |  |  |
| BnaA02g14040D                    | 1.032843257               | 0.36276815  | -1.415037499              | 0.3175746  | 0.186700714                  | 0.238666385 | -1.756074417              | 0.349296823 | -3.247927513             | 0.396731569 |  |  |
| BnaA02g15410D                    |                           | 0.22451918  | 4.824428435               | 0.3620637  | 0                            | 0.21244364  | 0                         | 0.226982722 | 3.906890596              | 0.310091497 |  |  |
| BnaA02g16050D                    | 3.222392421               | 0.268539311 | 0                         | 0.2263112  | 3.502500341                  | 0.268900366 | 0                         | 0.226982722 | 0                        | 0.223935767 |  |  |
| BnaA02g17250D                    | -5.345774837              | 0.423117229 | 0.167294745               | 0.2430321  | -1.976541027                 | 0.322362795 | -5.345774837              | 0.428548469 | 0.239187664              | 0.252650675 |  |  |
| BnaA02g18720D                    | 0.006756275               | 0.229069798 | 1.737572622               | 0.7326938  | -0.427703087                 | 0.42764363  | -0.473334535              | 0.437645303 | -0.180883641             | 0.333676776 |  |  |
| BnaA02g22560D                    | 1.619896291               | 0.367842738 | -1.133266531              | 0.2670973  | 1.956931278                  | 0.404051745 | -1.133266531              | 0.276410171 | -4.502500341             | 0.354653211 |  |  |
| BnaA02g25110D                    | -0.205951004              | 0.33156108  | 0.64040351                | 0.4947647  | 0.095413448                  | 0.272477896 | -0.276208041              | 0.363600338 | -0.5988887               | 0.37811174  |  |  |
| BnaA02g27630D                    | -0.637429921              | 0.268506288 | -0.155278225              | 0.2384837  | 0.179706022                  | 0.230890488 | -1.155278225              | 0.295633578 | -0.188445089             | 0.243967734 |  |  |
| BnaA02g27680D                    | 0.318132889               | 0.373690074 | 0.889395885               | 0.5555805  | -1.514031815                 | 0.683735338 | 0.026628823               | 0.32322852  | -0.630288324             | 0.525705379 |  |  |
| BnaA02g32120D                    | 0.516790998               | 0.259339005 | 5.182814513               | 0.7984475  | -0.40508789                  | 0.271571754 | -0.022367813              | 0.226982722 | -0.977973694             | 0.270696837 |  |  |
| BnaA02g34370D                    | 7.352516415               | 0.917450421 | 6.375660079               | 0.8334346  | 1.280107919                  | 0.265435116 | 0.050626073               | 0.226982722 | -0.900464326             | 0.245312885 |  |  |
| BnaA02g34570D                    |                           | 0.22451918  | 4.247927513               | 0.3211411  | 0                            | 0.21244364  | 0                         | 0.226982722 | 0                        | 0.223935767 |  |  |
| BnaA02g35180D                    |                           | 0.22451918  | 0                         | 0.2263112  | 4.196397213                  | 0.310820212 | 0                         | 0.226982722 | 0                        | 0.223935767 |  |  |
| BnaA02g35550D                    | -0.390462245              | 0.418359664 | -0.829961202              | 0.5551974  | 0.24748542                   | 0.357482211 | 0.430141991               | 0.438856159 | -0.134853269             | 0.311670013 |  |  |
| BnaA03g02000D                    |                           | 0.22451918  | 0                         | 0.2263112  | 0                            | 0.21244364  | 0                         | 0.226982722 | 0                        | 0.223935767 |  |  |
| BnaA03g02990D                    | -1.313660479              | 0.371178097 | 0.398358758               | 0.2838027  | -1.145262947                 | 0.355179383 | -0.898622298              | 0.356960441 | -1.145262947             | 0.377267604 |  |  |
| BnaA03g04290D                    | 2.342215494               | 0.74966096  | 3.094089163               | 0.7935072  | 0.535743873                  | 0.385239441 | 1.264527106               | 0.582195128 | 0.63024338               | 0.442645039 |  |  |
| BnaA03g04570D                    | 4.273018494               | 0.327631301 | 0                         | 0.2263112  | 0                            | 0.21244364  | 0                         | 0.226982722 | 0                        | 0.223935767 |  |  |
| BnaA03g07750D                    | 0.841302254               | 0.251219663 | 3.115477217               | 0.3937308  | -3                           | 0.249962574 | -3                        | 0.26634656  | -3                       | 0.264244073 |  |  |
| BnaA03g12320D                    | -0.981654857              | 0.406957801 | -1.791616275              | 0.4616775  | 0.106726801                  | 0.244302371 | -3.571835067              | 0.243306572 | -4.141200712             | 0.620579274 |  |  |
| BnaA03g13620D                    | 6.785724906               | 0.589973229 | 5.89077093                | 0.463179   | 0                            | 0.21244364  | 0                         | 0.226982722 | 0                        | 0.223935767 |  |  |
| BnaA03g16280D                    | -0.047828525              | 0.227618972 | 0.798366139               | 0.28711799 | -0.665580961                 | 0.254339269 | -4.938599455              | 0.388996227 | 0.296617006              | 0.253397002 |  |  |
| BnaA03g19580D                    | -2.151819064              | 0.577380323 | 0.559900579               | 0.3768141  | -0.073041951                 | 0.237816584 | -1.1966733                | 0.491222392 | -0.499742368             | 0.379112508 |  |  |
| BnaA03g20950D                    | -5.203442128              | 0.761514143 | -1.675063155              | 0.5699919  | -0.266049444                 | 0.315097837 | 0.159513236               | 0.289764521 | -0.955514614             | 0.533067385 |  |  |
| BnaA03g22100D                    | 3.571247563               | 0.70007749  | 1.232258574               | 0.4129152  | 0.688273218                  | 0.336061201 | -0.339357901              | 0.274380026 | -0.077652556             | 0.239947691 |  |  |
| BnaA03g24540D                    | 0.104606407               | 0.254634277 | -1.606855107              | 0.3930396  | -0.82045058                  | 0.337745253 | -2.127111918              | 0.448151132 | -2.053111336             | 0.466426257 |  |  |
| BnaA03g31510D                    | 0.783460305               | 0.368545035 | 2.457144893               | 0.6408556  | 0.290420294                  | 0.267594843 | 0.362570079               | 0.29249009  | 0.297472172              |             |  |  |
| BnaA03g33290D                    | 0.605859842               | 0.45374749  | 1.149815534               | 0.5861623  | -0.423156232                 | 0.375561397 | -0.322535418              | 0.344530452 | -0.088475188             | 0.268349977 |  |  |
| BnaA03g33790D                    | 1.346910745               | 0.692462309 | 1.364787905               | 0.6660811  | 0.043390666                  | 0.235069041 | -0.27118428               | 0.349395274 | -0.004103425             | 0.253733384 |  |  |
| BnaA03g34290D                    | 1.439764585               | 0.377095882 | -0.145197916              | 0.2384022  | -1.062735755                 | 0.274426274 | 0.532873399               | 0.275097749 | 2.990375581              | 0.629211578 |  |  |
| BnaA03g35680D                    | 0.560279349               | 0.450392317 | 0.272891903               | 0.3290403  | 0.219242341                  | 0.316271267 | 0.226581738               | 0.325152348 | -0.314604754             | 0.372719187 |  |  |
| BnaA03g40370D                    | 0.293557238               | 0.316394554 | 0.916662684               | 0.4702658  | 1.092024496                  | 0.556670277 | -0.402171                 | 0.327039434 | -0.129592907             | 0.2722005   |  |  |
| BnaA03g40380D                    | -1.689659879              | 0.546540914 | 0.935250191               | 0.4787242  | -0.658963082                 | 0.395619782 | -1.900891855              | 0.568560886 | -1.072314205             | 0.508033481 |  |  |
| BnaA03g42840D                    |                           | 0.22451918  | 0                         | 0.2263112  | 0                            | 0.21244364  | 0                         | 0.226982722 | 5.101538026              | 0.409011853 |  |  |
| BnaA03g46240D                    | 1.658076011               | 0.669844113 | -1.740517158              | 0.5265134  | -0.480873341                 | 0.356410053 | -2.366702321              | 0.607094737 | -1.675945156             | 0.590565448 |  |  |
| BnaA03g48270D                    |                           | 0.22451918  | 3.938599455               | 0.3001427  | 0                            | 0.21244364  | 0                         | 0.226982722 | 0                        | 0.223935767 |  |  |
| BnaA03g48910D                    | -0.59946207               | 0.250882824 | -1.556393349              | 0.2647857  | -4.058893689                 | 0.30296946  | -4.058893689              | 0.319509757 | -0.029146346             | 0.223935767 |  |  |
| BnaA03g49050D                    |                           | 0.22451918  | 0                         | 0.2263112  | 0                            | 0.21244364  | 0                         | 0.226982722 | 0                        | 0.223935767 |  |  |
| BnaA03g52210D                    | -1.622930351              | 0.377932474 | -2.237039197              | 0.3832162  | 0.338075517                  | 0.268275124 | -0.622930351              | 0.303795044 | 1.222392421              | 0.466738878 |  |  |
| BnaA03g52830D                    |                           | 0.22451918  | 6.81164228                | 0.5969705  | 0                            | 0.21244364  | 0                         | 0.226982722 | 2.874469118              | 0.258500211 |  |  |
| BnaA03g53830D                    | 1.153453992               | 0.533679418 | 0.132215195               | 0.2590572  | 0.471964567                  | 0.350078375 | -0.049988136              | 0.226982722 | 0.674438263              | 0.436597362 |  |  |
| BnaA03g53                        |                           |             |                           |            |                              |             |                           |             |                          |             |  |  |

|               |              |             |              |              |              |              |              |              |              |             |             |             |  |   |             |
|---------------|--------------|-------------|--------------|--------------|--------------|--------------|--------------|--------------|--------------|-------------|-------------|-------------|--|---|-------------|
| BnaA06g27670D |              | 0           | 0.22451918   |              | 0            | 0.2263112    |              | 0            | 0.21244364   |             | 0           | 0.226982722 |  | 0 | 0.223935767 |
| BnaA06g27900D | 1.027470375  | 0.603200183 |              | -2.04631753  | 0.6673007    | 0.309684499  | 0.35871068   |              | 0.415998244  | 0.202807957 | 0.098180394 | 0.279474444 |  |   |             |
| BnaA06g33270D | 0.59776757   | 0.501072158 |              | -0.529244948 | 0.4488446    | -0.60955257  | 0.507690038  | -0.700685369 | 0.527906936  | -0.59248495 | 0.536065906 |             |  |   |             |
| BnaA06g33420D | -0.026152288 | 0.230410546 |              | -0.739848103 | 0.3658327    | -0.176689972 | 0.265124696  | -0.093685446 | 0.253183451  | -0.70774726 | 0.404754042 |             |  |   |             |
| BnaA06g35500D | -1.739716205 | 0.629667301 | 2.668897137  | 0.7916336    | 0.267835392  | 0.328498714  | 0.033410415  | 0.237215559  | -0.637429921 | 0.472665469 |             |             |  |   |             |
| BnaA06g40170D | 0.013127434  | 0.226716334 | 2.109785303  | 0.661711     | 0.723185155  | 0.408945806  | -0.43718554  | 0.321951284  | -0.259346668 | 0.294077372 |             |             |  |   |             |
| BnaA07g06750D | 2.222392421  | 0.311179066 | 0.3795506    |              | -4           | 0.299295061  |              | 0.16059918   | -4           | 0.316353112 |             |             |  |   |             |
| BnaA07g06760D | 0            | 0.22451918  | 0.2263112    | 4.169925001  | 0.310820212  |              | 0.226982722  |              | 0.226982722  | 0           | 0.223935767 |             |  |   |             |
| BnaA07g08440D | 0.593717058  | 0.409309063 | 2.2178471    | 0.7191056    | 0.358949764  | 0.335970799  | -0.888222768 | 0.443670964  | -0.908441047 | 0.47645655  |             |             |  |   |             |
| BnaA07g08450D | 0.089916637  | 0.242316566 | -0.466989579 | 0.2881552    | -3.151487753 | 0.467936525  | -0.06160225  | 0.237255187  | -1.236376651 | 0.402805664 |             |             |  |   |             |
| BnaA07g10270D | 0            | 0.22451918  | 3.736965594  | 0.2890842    | 0            | 0.21244364   | 0.226982722  |              | 0.226982722  | 0           | 0.223935767 |             |  |   |             |
| BnaA07g12040D | 1.901372531  | 0.782561027 | -0.758550319 | 0.5252739    | 0.522826754  | 0.481528937  | 0.303114394  | 0.377344658  | 0.132769229  | 0.309602751 |             |             |  |   |             |
| BnaA07g12050D | 0.06962558   | 0.236898535 | -2.839063782 | 0.440558     | -1.02713613  | 0.36228821   | -0.913064363 | 0.353640495  | -0.238159737 | 0.271590669 |             |             |  |   |             |
| BnaA07g13990D | 1.505046396  | 0.727183064 | -2.764426956 | 0.7685371    | 0.164092297  | 0.303343725  | 0.261648471  | 0.353988341  | -0.004035513 | 0.225463648 |             |             |  |   |             |
| BnaA07g16350D | -2.146841388 | 0.288610906 | 3.076470826  | 0.5161044    | 0.615659298  | 0.253971609  | -0.36923381  | 0.250158512  | 0.800691192  | 0.281863134 |             |             |  |   |             |
| BnaA07g20720D | 0.461296304  | 0.410194089 | 0.62736898   | 0.4501083    | -0.147669239 | 0.282459756  | 0.403404139  | 0.388396474  | 0.338386122  | 0.256329783 |             |             |  |   |             |
| BnaA07g21680D | 1.184424571  | 0.340360703 | 2.788495895  | 0.5259321    | 2.012243596  | 0.446852214  | 1.821339151  | 0.424530628  | 2.237535908  | 0.507582162 |             |             |  |   |             |
| BnaA07g21980D | -0.117356951 | 0.234252263 | 2.430452552  | 0.4364124    | -1.04580369  | 0.257412642  | 0.882643049  | 0.289511342  | 0.475733431  | 0.257617387 |             |             |  |   |             |
| BnaA07g23090D | 1.883837721  | 0.76059675  | 0.950071419  | 0.5610007    | -2.106768661 | 0.719149583  | -1.278747271 | 0.622952552  | -0.68456624  | 0.528325249 |             |             |  |   |             |
| BnaA07g23650D | -3.187465583 | 0.64392832  | 1.993447248  | 0.6942874    | -0.171015062 | 0.272794921  | 0.241566786  | 0.306864014  | -0.184160438 | 0.29276084  |             |             |  |   |             |
| BnaA07g24590D | -1.139135224 | 0.585466642 | 0.842490084  | 0.5234576    | -0.634172046 | 0.466985452  | -2.365524033 | 0.723273099  | -0.673512937 | 0.512454208 |             |             |  |   |             |
| BnaA07g27210D | -7.05166212  | 0.624205238 | 0.608928086  | 0.3402748    | -0.252920328 | 0.265261193  | -5.314696526 | 0.583260682  | 0.63016192   | 0.383007063 |             |             |  |   |             |
| BnaA07g29400D | 4.087462841  | 0.316995579 | 4.938599455  | 0.3727918    | 3.969626351  | 0.297018652  |              | 0.226982722  |              | 0.223935767 |             |             |  |   |             |
| BnaA07g30130D | 3.196955207  | 0.520481084 | 0.422691072  | 0.2446128    | -1.031028696 | 0.246587587  | 1.186878135  | 0.38335658   | 0.888354644  | 0.276429691 |             |             |  |   |             |
| BnaA07g31860D | -3.36923381  | 0.275018493 | 3.31259023   | 0.4472353    | 0.903784685  | 0.248875004  | -3.36923381  | 0.272939317  | 0.928346739  | 0.263315016 |             |             |  |   |             |
| BnaA07g33380D | -3.938599455 | 0.30533932  | -3.938599455 | 0.3001427    | -0.938599455 | 0.242503699  | -0.938599455 | 0.273969364  | 0.952171475  | 0.280832805 |             |             |  |   |             |
| BnaA07g33640D | -7.862120725 | 0.72375524  | -0.854626189 | 0.3854244    | -3.359620385 | 0.603876061  | -4.803227036 | 0.653285604  | -0.232764105 | 0.296285533 |             |             |  |   |             |
| BnaA07g33930D | -0.320118505 | 0.394576244 | -0.537748055 | 0.4731366    | -0.379535046 | 0.429125277  | -0.43791231  | 0.448703723  | -0.267513843 | 0.400762619 |             |             |  |   |             |
| BnaA07g35130D | -0.22435112  | 0.335385184 | 1.781221082  | 0.7387148    | -0.844739063 | 0.575445155  | -0.342082114 | 0.38761272   | -0.158796255 | 0.323415319 |             |             |  |   |             |
| BnaA07g38140D | 1.452512205  | 0.476729543 | 2.14008972   | 0.5637615    | 1.342035668  | 0.459663074  | 1.438573014  | 0.478767748  | 1.275634443  | 0.27582312  |             |             |  |   |             |
| BnaA08g01300D | 2.917315897  | 0.768504086 | 3.068159894  | 0.7618356    | 0.79262015   | 0.414544366  | -0.149322749 | 0.344779052  | 0.476343722  | 0.354193085 |             |             |  |   |             |
| BnaA08g04090D | 1.595490053  | 0.698049861 | -0.092880967 | 0.2583997    | -0.218827217 | 0.303235848  | 0.456625121  | 0.399212723  | -0.24905238  | 0.33437467  |             |             |  |   |             |
| BnaA08g04940D | 1.099535674  | 0.506912889 | -0.249359469 | 0.2769977    | 0.572183896  | 0.370224823  | 0.518130992  | 0.359969997  | 0.886218077  | 0.484972172 |             |             |  |   |             |
| BnaA08g08300D | -0.041519269 | 0.232609902 | 1.110747066  | 0.4813399    | -0.02061026  | 0.217819844  | 0.415037499  | 0.333487474  | 0.180120769  | 0.276976988 |             |             |  |   |             |
| BnaA08g08310D | -0.065095028 | 0.228660309 | 2.97593224   | 0.5150476    | -1           | 0.257412642  | -0.043068722 | 0.229441861  | 2.08246216   | 0.447145021 |             |             |  |   |             |
| BnaA08g11220D | 2.874469118  | 0.256930501 | 7.544320516  | 0.6611253    | 0            | 0.21244364   | 0.226982722  | 2.874469118  | 0.258500211  |             |             |             |  |   |             |
| BnaA08g12010D | -2.027480736 | 0.32307628  | -5.142957954 | 0.3895391    | -5.142957954 | 0.392044454  | -5.142957954 | 0.406962204  | 1.993178734  | 0.496598595 |             |             |  |   |             |
| BnaA08g12710D | -4.029747343 | 0.311179066 | -1.091147888 | 0.2577627    | -0.970853654 | 0.245768608  | -0.970853654 | 0.261221336  | -0.091147888 | 0.231015974 |             |             |  |   |             |
| BnaA08g13860D | 3.573991383  | 0.458099968 | 7.502379789  | 0.9028651    | 3.2410081    | 0.41110659   | 3.102810806  | 0.20740428   | 0.8259706    | 0.252439325 |             |             |  |   |             |
| BnaA08g13940D | 1.896164189  | 0.288003276 | 1.736965594  | 0.2744087    | 3.115477217  | 0.374192029  | -0.08246216  | 0.226982722  |              | 0.223935767 |             |             |  |   |             |
| BnaA08g15790D | -2.098302074 | 0.364943288 | -0.72549281  | 0.2844764    | 0.505038956  | 0.280465145  | -0.739848103 | 0.297093505  | -0.296241451 | 0.261078235 |             |             |  |   |             |
| BnaA08g16220D | -1.904030941 | 0.695533147 | -0.017921908 | 0.2312361    | 0.145116708  | 0.270685829  | 0.051240117  | 0.243324879  | -0.629535537 | 0.434820705 |             |             |  |   |             |
| BnaA08g18380D | 1.43410805   | 0.523391877 | 3.094563002  | 0.7996517    | 0.396300984  | 0.34871341   | -0.017165855 | 0.231436472  | 0.789067308  | 0.390584822 |             |             |  |   |             |
| BnaA08g18390D | -0.712341807 | 0.347956075 | -0.821820284 | 0.3445877    | -0.768925336 | 0.352405421  | -0.740356183 | 0.354593769  | 0.323282103  | 0.307374775 |             |             |  |   |             |
| BnaA08g19170D | 0            | 0.22451918  | 0.2263112    | 2.662965013  | 0.239348868  | 0.226982722  | 0.226982722  | 0.226982722  | 0.226982722  | 0.223935767 |             |             |  |   |             |
| BnaA08g19490D | -0.11047352  | 0.275623921 | 0.309496275  | 0.3521544    | -0.47102838  | 0.422522808  | -1.757450452 | 0.69411788   | -0.578873336 | 0.495931523 |             |             |  |   |             |
| BnaA08g20700D | 0.09231475   | 0.256049878 | 1.050582241  | 0.528825     | -0.037340912 | 0.227555127  | -0.105449299 | 0.265699303  | -0.181250323 | 0.296254711 |             |             |  |   |             |
| BnaA08g22160D | -5.183221824 | 0.405451936 | -0.745816512 | 0.2701883    | 1.598137889  | 0.413113354  | 0.308631272  | 0.259931283  | 1.297904666  | 0.390584822 |             |             |  |   |             |
| BnaA08g23880D | 0            | 0.22451918  | 0.2263112    | 4.459431619  | 0.332505548  | 0.226982722  | 0.226982722  | 0.226982722  | 0.226982722  | 0.223935767 |             |             |  |   |             |
| BnaA08g24660D | 3.530514717  | 0.52572079  | -3.584962501 | 0.2834218    | 1.39930607   | 0.289156892  | 0.852442812  | 0.269709687  | 0.784271309  | 0.26242999  |             |             |  |   |             |
| BnaA08g30910D | 8.217553864  | 0.76367387  | 0            | 0.2263112    | 0            | 0.21244364   | 3.222392421  | 0.272455881  | 3.169925001  | 0.270666015 |             |             |  |   |             |
| BnaA08g30930D | 5.044394119  | 0.393121015 | 0            | 0.2263112    | 0            | 0.21244364   | 0.226982722  | 0.226982722  | 0.226982722  | 0.223935767 |             |             |  |   |             |
| BnaA08g30950D | 0            | 0.22451918  | 0.2263112    | 0            | 0.21244364   | 0.226982722  | 0.226982722  | 0.226982722  | 0.226982722  | 0.223935767 |             |             |  |   |             |
| BnaA09g04470D | -0.558490289 | 0.297428141 | -6.339850003 | 0.514973     | 0.830074999  | 0.360932051  | -1.639410285 | 0.387799852  | -6.339850003 | 0.556734122 |             |             |  |   |             |
| BnaA09g04650D | -3.024756099 | 0.545647082 | 1.697709925  | 0.5915958    | -2.024756099 | 0.504288633  | -0.852367058 | 0.264949956  | -3.002729793 | 0.576959826 |             |             |  |   |             |
| BnaA09g05710D | 0.312682298  | 0.3194283   | 0.370034005  | 0.3223123    | 0.146498312  | 0.263612227  | 0.349315195  | 0.33151925   | 0.156073756  | 0.282428934 |             |             |  |   |             |
| BnaA09g07540D | 0.873875538  | 0.536349907 | 1.862924815  | 0.7104512    | -0.2410081   | 0.312083906  | -0.367942382 | 0.35971459   | -1.486406364 | 0.641606344 |             |             |  |   |             |
| BnaA09g10730D | 0            | 0.22451918  | 3.36923381   | 0.2716061    | 0            | 0.21244364   | 0.226982722  | 0.226982722  | 0.226982722  | 0.223935767 |             |             |  |   |             |
| BnaA09g10750D | -5.491853096 | 0.437735567 | -5.491853096 | 0.4231987    | -1.617383978 | 0.320471838  | -0.243925583 | 0.254530804  | -2.491853096 | 0.365933989 |             |             |  |   |             |
| BnaA09g12290D | -1.054447784 | 0.505891366 | 1.194552144  | 0.574941     | -0.9266538   | 0.486929356  | -1.079578499 | 0.511838494  | -0.780882711 | 0.480116203 |             |             |  |   |             |
| BnaA09g12960D | -3.906890596 | 0.30533932  | -3.906890596 | 0.3001427    | -3.906890596 | 0.293320036  | -3.906890596 | 0.310414334  | -3.906890596 | 0.31091497  |             |             |  |   |             |
| BnaA09g18210D | 2.464108106  | 0.447646976 | 0.893084796  | 0.2735897    | -0.637429921 | 0.241825619  | -0.559427409 | 0.253802089  | -1.485426827 | 0.27716281  |             |             |  |   |             |
| BnaA09g27300D | 0.292026609  | 0.26306624  | 2.586503019  | 0.5804097    | -5.700439718 | 0.453098031  | -2           | 0.358871394  | -0.478047297 | 0.277083553 |             |             |  |   |             |
| BnaA09g27310D | 0            | 0.22451918  | 3.736965594  | 0.2890842    | 0            | 0.21244364   | 0.226982722  | 0.226982722  | 0.226982722  | 0.223935767 |             |             |  |   |             |
| BnaA09g27330D | 5.073248982  | 0.396007256 | 0            | 0.2263112</  |              |              |              |              |              |             |             |             |  |   |             |

|               |              |             |              |           |              |             |              |             |              |             |
|---------------|--------------|-------------|--------------|-----------|--------------|-------------|--------------|-------------|--------------|-------------|
| BnaAnng13660D | 0            | 0.22451918  | 0            | 0.2263112 | 2.938599455  | 0.248216739 | 4.459431619  | 0.348669379 | 3.841302254  | 0.303865494 |
| BnaAnng20260D | 0.22762907   | 0.284692134 | -1.208470045 | 0.4130759 | -0.893834443 | 0.392288827 | -0.351743749 | 0.306520571 | -0.664495956 | 0.37968051  |
| BnaAnng20420D | -0.03166864  | 0.2266679   | 0.431339312  | 0.2654791 | 3.107890723  | 0.66356027  | -0.044394119 | 0.229441861 | 0.723790205  | 0.37177169  |
| BnaAnng21280D | 0.228991532  | 0.295169344 | 2.081021009  | 0.6892833 | -0.256751364 | 0.28915469  | -1.166687665 | 0.474990313 | -0.483946001 | 0.36640292  |
| BnaAnng23490D | -0.648527629 | 0.25421378  | 4.527881406  | 0.7080735 | -0.648527629 | 0.241852038 | -4.273018494 | 0.332813766 | -0.076621282 | 0.230703353 |
| BnaAnng26790D | 2.584962501  | 0.251618144 | 0            | 0.2263112 | 0            | 0.21244364  | 0            | 0.226982722 | 0            | 0.223935767 |
| BnaAnng28960D | -8.509115185 | 0.793604037 | 0.432421553  | 0.3525749 | -1.586283045 | 0.568230653 | -5.450221496 | 0.740665299 | -0.208381312 | 0.304710892 |
| BnaAnng29660D | -0.078002512 | 0.22451918  | 1.337034987  | 0.261371  | -0.078002512 | 0.21244364  | -2.662965013 | 0.255299148 | -2.662965013 | 0.252892846 |
| BnaAnng29870D | -1.440572591 | 0.365843725 | 0.6387852    | 0.3128853 | -2.10496956  | 0.392568424 | -6.247927513 | 0.529472243 | -0.091423028 | 0.242697436 |
| BnaAnng34260D | 7.375039431  | 0.664407869 | 5.653442239  | 0.4382155 | 3.169925001  | 0.256058685 | 0            | 0.226982722 | 0            | 0.223935767 |
| BnaAnng35170D | 3.407592687  | 0.811498292 | 1.973593269  | 0.6328794 | 1.047305715  | 0.490784283 | 1.939337218  | 0.664172303 | 1.326447112  | 0.586518986 |
| BnaAnng36290D | 0            | 0.22451918  | 8.215937399  | 0.7413875 | 0            | 0.21244364  | 3.415037499  | 0.283188471 | 3.321928095  | 0.277510656 |
| BnaAnng36370D | 0            | 0.22451918  | 3.36923381   | 0.2716061 | 0            | 0.21244364  | 0            | 0.226982722 | 0            | 0.223935767 |
| BnaAnng37390D | -0.4622646   | 0.393149635 | 0.310134688  | 0.3386325 | 0.654262014  | 0.484410775 | -0.704779986 | 0.464854345 | -0.806293987 | 0.530174539 |
| BnaAnng37500D | 2.711042249  | 0.619159269 | 0.551642428  | 0.2821846 | 0.167727446  | 0.235956268 | -0.040077439 | 0.229441861 | -2.331843564 | 0.371279369 |
| BnaAnng40110D | 1            | 0.251897742 | -2.584962501 | 0.2496566 | -2.584962501 | 0.239348868 | -2.584962501 | 0.255299148 | -2.584962501 | 0.252892846 |
| BnaAnng40580D | 2.055560545  | 0.785902991 | 1.12659757   | 0.620139  | -0.580168605 | 0.472561996 | -0.046262723 | 0.249515657 | 0.483036617  | 0.479186481 |
| BnaAnng40920D | -0.9274875   | 0.253680119 | -2.014950341 | 0.3037796 | -1.045323999 | 0.277490842 | -3.20E-16    | 0.226982722 | 0.954676009  | 0.326259731 |
| BnaAnng41450D | 0.04508789   | 0.227618972 | -4.392317423 | 0.3309579 | -0.977279923 | 0.252584628 | -0.977279923 | 0.268004333 | -4.392317423 | 0.345725897 |
| BnaC01g00660D | -1.131152692 | 0.533344781 | -2.224966365 | 0.6190954 | -0.376969458 | 0.35302626  | -0.963811692 | 0.502690303 | -1.57247987  | 0.633964952 |
| BnaC01g01290D | 0.236376651  | 0.267984519 | -2.91511102  | 0.4172589 | 0.26848836   | 0.261776128 | -2.113656782 | 0.419975607 | -0.686842115 | 0.325365899 |
| BnaC01g01700D | 1.40330266   | 0.685239001 | 2.170528867  | 0.7612874 | 0.654298773  | 0.498058227 | 0.714173037  | 0.509015376 | -0.008723806 | 0.228750572 |
| BnaC01g01710D | 0.241640306  | 0.274981067 | -0.115477217 | 0.2470807 | 1.153851518  | 0.474096481 | -0.667424661 | 0.33206964  | 0.210008697  | 0.273180193 |
| BnaC01g03990D | 3.722589504  | 0.296939396 | 6.357552005  | 0.5160551 | 0            | 0.21244364  | 0            | 0.226982722 | 0            | 0.223935767 |
| BnaC01g05620D | 0.210473731  | 0.257152859 | 1.422571172  | 0.4242087 | -5.992466327 | 0.488369175 | -0.329501315 | 0.268708831 | 1.653792353  | 0.525500634 |
| BnaC01g07340D | 1.742202243  | 0.437566047 | 0.644905041  | 0.2811014 | 0.898120386  | 0.310078287 | 0.447458977  | 0.421713935 | -0.18146871  | 0.243782803 |
| BnaC01g10080D | -1.271397879 | 0.51619025  | -0.800422208 | 0.4955534 | 0.386614277  | 0.350994234 | 0.64005164   | 0.437402034 | -0.357812631 | 0.350157244 |
| BnaC01g10100D | 0.17992797   | 0.272409648 | 1.951279185  | 0.6329454 | -0.140792344 | 0.250301613 | -0.886841043 | 0.392141322 | -1.134768556 | 0.453837754 |
| BnaC01g15610D | -0.082224131 | 0.253857128 | 1.170599316  | 0.575749  | -0.30408113  | 0.325592659 | 0.050695844  | 0.244452077 | -0.269523908 | 0.335739635 |
| BnaC01g20660D | 0            | 0.22451918  | 6.437405312  | 0.5262712 | 3.662965013  | 0.278871218 | 0            | 0.226982722 | 0            | 0.223935767 |
| BnaC01g35070D | 0.818027371  | 0.419033341 | 1.726731537  | 0.5863385 | 2.303818714  | 0.710363169 | 0.454241571  | 0.3315941   | 0.375509135  | 0.327752386 |
| BnaC01g36330D | 2.14337484   | 0.677479304 | 1.238091108  | 0.4863658 | 1.782335147  | 0.630409225 | 0.387951319  | 0.31675405  | 0.741378473  | 0.42358616  |
| BnaC01g40920D | 0.708660225  | 0.322164835 | 0.526068812  | 0.2860373 | -0.631032149 | 0.280297827 | -1.363748271 | 0.33257952  | -1.64385619  | 0.367926396 |
| BnaC02g00280D | -0.340424439 | 0.262064532 | -2.650764559 | 0.3551398 | -0.207152908 | 0.238983409 | -1.165337732 | 0.325143542 | -1.566700294 | 0.352440648 |
| BnaC02g01530D | 0.748815312  | 0.294196256 | -1.599912842 | 0.2968505 | 0.342601663  | 0.245414157 | -0.645716532 | 0.271768995 | -1.599912842 | 0.314499014 |
| BnaC02g01680D | 0            | 0.22451918  | -3           | 0.2596164 | -3           | 0.249962454 | -3           | 0.26634656  | -0.061400545 | 0.223935767 |
| BnaC02g03940D | -0.857980995 | 0.356982458 | -2.470957872 | 0.4484197 | -0.830500259 | 0.349171334 | -0.514026594 | 0.31624705  | 0.560520359  | 0.360361848 |
| BnaC02g04660D | 0            | 0.22451918  | 3.841302254  | 0.2947973 | 0            | 0.21244364  | 2.938599455  | 0.264316725 | 3.841302254  | 0.303865494 |
| BnaC02g09020D | 4.95419631   | 0.384678044 | 3.807354922  | 0.2947973 | 0            | 0.21244364  | 0            | 0.226982722 | 0            | 0.223935767 |
| BnaC02g11520D | 0.575802501  | 0.380266682 | -0.486797125 | 0.3220614 | -0.51261786  | 0.337197066 | -0.678071905 | 0.374040121 | -1.332237194 | 0.498386259 |
| BnaC02g14430D | -0.550103744 | 0.340323277 | -0.139857664 | 0.2570318 | -1.125530882 | 0.431141904 | -2.958777337 | 0.255989274 | -1.281975969 | 0.47528312  |
| BnaC02g18650D | 2.502500341  | 0.250160714 | -0.087462841 | 0.2263112 | -2.502500341 | 0.237869421 | 0            | 0.226982722 | 1.436099115  | 0.269226197 |
| BnaC02g20580D | -0.391640048 | 0.399509333 | 0.763815532  | 0.5224691 | 0.035396211  | 0.234811459 | 0            | 0.223037547 | -0.112043451 | 0.291532372 |
| BnaC02g21480D | 0            | 0.22451918  | 2            | 0.2407733 | 3.502500341  | 0.268900366 | 2.115477217  | 0.245020078 | 0            | 0.223935767 |
| BnaC02g22960D | -2.938599455 | 0.260714978 | -2.938599455 | 0.257568  | -2.938599455 | 0.248216739 | -2.938599455 | 0.264316725 | -2.938599455 | 0.262328719 |
| BnaC02g24390D | 0            | 0.22451918  | 3.321928095  | 0.2716061 | 0            | 0.21244364  | 0            | 0.226982722 | 0            | 0.223935767 |
| BnaC02g24770D | -1.001020055 | 0.559635774 | 0.359150559  | 0.3664425 | -0.815572429 | 0.523871482 | -0.559319556 | 0.442094649 | 0.042902962  | 0.247175402 |
| BnaC02g30930D | -2.958693026 | 0.429684473 | -1.486624582 | 0.3554876 | -0.693750816 | 0.302962855 | -2.958693026 | 0.433968703 | -2.00598741  | 0.419629962 |
| BnaC02g35650D | 1.71431396   | 0.533082796 | -0.190942783 | 0.251977  | 1.038238804  | 0.406764064 | 0.200077835  | 0.263020008 | 0.21041978   | 0.264735021 |
| BnaC02g35790D | 3.502500341  | 0.281262109 | 3.502500341  | 0.2775591 | 0            | 0.21244364  | 0            | 0.226982722 | 0            | 0.223935767 |
| BnaC02g40810D | 3.544320516  | 0.835033376 | 8.156504486  | 0.734512  | 5.437405312  | 0.422300451 | 0            | 0.226982722 | 3.502500341  | 0.284375097 |
| BnaC02g43290D | 3.763872287  | 0.284491352 | 2.032228333  | 0.6404351 | 0.062365881  | 0.229362605 | -0.050108848 | 0.237959685 | -1.926578931 | 0.516815492 |
| BnaC02g43540D | -2.938599455 | 0.260714978 | -2.938599455 | 0.257568  | -2.938599455 | 0.248216739 | -2.938599455 | 0.264316725 | 1.38332864   | 0.277028515 |
| BnaC02g44180D | 0            | 0.22451918  | 0            | 0.2263112 | 0            | 0.21244364  | 0            | 0.226982722 | 0            | 0.223935767 |
| BnaC02g48800D | -1.728861884 | 0.642715929 | 1.52791999   | 0.6659071 | -2.119546207 | 0.683975307 | -2.263608156 | 0.694039079 | -0.354194764 | 0.381677322 |
| BnaC03g05820D | 1.99919917   | 0.75592439  | 2.832974286  | 0.8040702 | 0.47405928   | 0.409973934 | 1.063817022  | 0.594869929 | 0.360166255  | 0.391659181 |
| BnaC03g09750D | 2.59454855   | 0.366814611 | 4.039138394  | 0.5140041 | -3.058893689 | 0.249962574 | -3.058893689 | 0.26634656  | -0.120294234 | 0.321498115 |
| BnaC03g14960D | -1.210035215 | 0.322149424 | -2.36923381  | 0.3484822 | -0.210035215 | 0.238983409 | -5.691161905 | 0.464838934 | -1.721535554 | 0.35821533  |
| BnaC03g17400D | -4.604862058 | 0.352933795 | -0.666262603 | 0.2554555 | -1.545968369 | 0.276365846 | 1.69891869   | 0.389376167 | 0.939458458  | 0.304834179 |
| BnaC03g19560D | -0.186413124 | 0.231266952 | -0.186413124 | 0.2323237 | -3.459431619 | 0.268900366 | -3.459431619 | 0.285733471 | 1.347923303  | 0.295682307 |
| BnaC03g23470D | -1.26280669  | 0.53631248  | 1.255518618  | 0.8566119 | 0.374037603  | 0.354831537 | -0.570798878 | 0.399295884 | 0.11705922   | 0.273475202 |
| BnaC03g25060D | -3.836501268 | 0.48696238  | -2.019365325 | 0.4032548 | -0.514573173 | 0.293346455 | -0.96203215  | 0.355870672 | -0.658963082 | 0.332318416 |
| BnaC03g25680D | 3.166436015  | 0.51317852  | 1.798366139  | 0.3352817 | -3.938599455 | 0.293320036 | -3.938599455 | 0.310144334 | -3.938599455 | 0.310991497 |
| BnaC03g26480D | 3.625226371  | 0.788260858 | 1.154722595  | 0.4141261 | 0.801900492  | 0.363468245 | -1.60E-16    | 0.226982722 | 0.851018259  | 0.396515816 |
| BnaC03g29310D | 1.899385638  | 0.348962186 | -3.772589504 | 0.2922413 | 0.909234536  | 0.258590475 | -0.898120386 | 0.254513192 | 0.423807709  | 0.248181514 |
| BnaC03g31040D | 4.459431619  | 0.343167688 | 0            | 0.2263112 | 2.736965494  | 0.243100321 | 3.700439718  | 0.298240516 | 3.662965013  | 0.294931576 |
| BnaC03g38390D | 0.587366083  | 0.479375515 | 1.55110889   | 0.7069199 | 0.0287964    | 0.230252034 | 0.29949194   | 0.373463313 | 0.116536602  | 0.300620399 |
| BnaC03g39000D | 1.555678497  | 0.29206239  | 2.001398534  | 0.7505592 | -0.065618379 | 0.250002202 | -0.057083026 | 0.254139966 | 0.316493234  | 0.396355102 |
| BnaC03g41530D | -0.268079366 | 0.355861866 | -0.024697902 | 0.2357373 | 0.092387299  | 0.266003117 | -0.121148241 | 0.289528955 | -0.258651765 | 0.376503663 |
| BnaC03g48820D | 0.270089163  | 0.246536951 | 0.626782676  | 0.2625863 | 0.93490472   | 0.28515226  | -0.306103128 | 0.246798936 | -2.387032123 | 0.30258452  |
| BnaC03g49530D | 3.449591228  | 0.673823928 | 2.740332445  | 0.5482833 | -5.156504486 | 0.395014354 | -0.265733555 | 0.252390891 | -0.493539473 | 0.26367387  |
| BnaC03g56560D | -5.437405312 | 0.430956973 | -2.068171503 | 0.3263126 | -1.04508789  | 0.292327134 | -5.437405312 | 0.436533517 | -0.467778961 | 0.26908506  |
| BnaC03g60650D | -0.604164755 | 0.429387263 | 0.589885053  | 0.4295832 | 0.388121866  | 0.37        |              |             |              |             |

|               |              |             |              |           |              |             |              |             |              |             |
|---------------|--------------|-------------|--------------|-----------|--------------|-------------|--------------|-------------|--------------|-------------|
| BnaC05g09160D | -1.078002512 | 0.25565334  | -3.662965013 | 0.2864842 | -3.662965013 | 0.278871218 | -3.662965013 | 0.295451143 | -1.078002512 | 0.256893075 |
| BnaC05g11660D | 0            | 0.22451918  | 0            | 0.2263112 | 0            | 0           | 0            | 0.226982722 | 0            | 0.223935767 |
| BnaC05g12270D | 5.745954377  | 0.46631838  | 0            | 0.2263112 | 0            | 0.21244364  | 3.36923381   | 0.279293917 | 4.922832139  | 0.39072352  |
| BnaC05g17200D | -4.965434498 | 0.711133714 | 0.239284835  | 0.2959839 | -0.987460804 | 0.47327645  | -8.424866117 | 0.790871905 | 0.450622729  | 0.397616594 |
| BnaC05g17550D | 0.957771765  | 0.547736359 | 1.763236016  | 0.6846402 | -0.490986353 | 0.383892088 | -0.804275529 | 0.460495262 | 0.193928957  | 0.309899961 |
| BnaC05g18050D | 2.191550386  | 0.590294656 | 3.740812317  | 0.7603165 | -0.516575526 | 0.276709289 | -0.477047162 | 0.284108722 | -6.101538026 | 0.526172109 |
| BnaC05g20560D | -0.073985711 | 0.263189528 | 0.503048714  | 0.4541834 | -0.556011127 | 0.504447145 | -0.538566242 | 0.486343742 | 0.159147988  | 0.331902321 |
| BnaC05g20650D | -2.669278787 | 0.511465709 | 0.109163443  | 0.2494232 | -0.634632644 | 0.337205872 | 0.638554478  | 0.375275195 | -1.421351273 | 0.465715154 |
| BnaC05g21820D | 3.544320516  | 0.285033376 | 4.969626351  | 0.3742427 | 0            | 0.21244364  | 4.415037499  | 0.343660837 | 6.392317423  | 0.563484096 |
| BnaC05g27390D | 0            | 0.22451918  | 0            | 0.2263112 | 0            | 0.21244364  | 0            | 0.226982722 | 0            | 0.223935767 |
| BnaC05g31720D | 0.469828601  | 0.428513245 | -0.42685809  | 0.3867431 | 0.079442351  | 0.255926591 | 0.191541003  | 0.315701064 | 0.014058041  | 0.230135352 |
| BnaC05g36570D | -0.506002879 | 0.439976752 | 0.427663393  | 0.4035102 | -0.711193211 | 0.516234281 | -0.122988911 | 0.286202402 | -0.027191484 | 0.242274737 |
| BnaC05g37110D | 1.346802764  | 0.434032548 | 0.972293071  | 0.3494553 | -0.742202243 | 0.291446511 | -0.742202243 | 0.303517648 | -1.064130337 | 0.337901564 |
| BnaC05g38410D | 4.052341236  | 0.874315316 | 2.569933219  | 0.7678194 | 0.194026896  | 0.287067614 | -1.062790373 | 0.49926468  | -0.299371237 | 0.337674804 |
| BnaC05g39400D | 0.96411708   | 0.610390468 | 0.149301646  | 0.2953939 | -0.268278192 | 0.352762073 | 0.163975735  | 0.308482159 | 0.422989623  | 0.459246979 |
| BnaC05g42130D | 1.422116129  | 0.602141234 | 4.290062625  | 0.8661079 | 0.057561958  | 0.232365529 | 0.190441181  | 0.285343795 | -0.03166536  | 0.234386658 |
| BnaC06g00880D | -5.357552005 | 0.4240661   | -0.657112286 | 0.2694419 | -1.161154792 | 0.297040667 | -1.109624491 | 0.306181532 | 1.134301092  | 0.378711825 |
| BnaC06g03860D | -0.049891805 | 0.251065554 | -0.328733117 | 0.3809772 | 0.390240204  | 0.429156099 | 0.234096096  | 0.348975395 | -0.329616377 | 0.427551164 |
| BnaC06g03910D | 0            | 0.22451918  | 4.273018494  | 0.3211411 | 3.415037499  | 0.266500669 | 0            | 0.226982722 | 0            | 0.223935767 |
| BnaC06g10050D | 0            | 0.22451918  | 0            | 0.2263112 | 0            | 0.21244364  | 0            | 0.226982722 | 0            | 0.223935767 |
| BnaC06g15540D | -1.611194042 | 0.416994699 | -3.425182057 | 0.4632076 | 0.437605256  | 0.302982669 | -1.413594082 | 0.404500863 | -2.824789515 | 0.497184209 |
| BnaC06g17770D | -3.169925001 | 0.268539311 | -3.169925001 | 0.2654263 | -3.169925001 | 0.256058685 | -3.169925001 | 0.272455881 | -3.169925001 | 0.270666015 |
| BnaC06g20590D | 0.125876977  | 0.285489098 | 0.601177884  | 0.4564048 | 0.340453804  | 0.37668199  | 0.440426843  | 0.415376554 | 0.198459967  | 0.334273398 |
| BnaC06g21120D | 0            | 0.22451918  | 0            | 0.2263112 | 0            | 0.21244364  | 0            | 0.226982722 | 0            | 0.223935767 |
| BnaC06g22710D | 5.247927513  | 0.413307091 | 6.64385619   | 0.5500458 | 4.273018494  | 0.316359329 | 3.321928095  | 0.279393917 | 3.321928095  | 0.277510656 |
| BnaC06g24360D | 3.084316286  | 0.425896175 | 4.555725279  | 0.5979032 | 2.163975735  | 0.326526119 | 1.84502534   | 0.314078516 | 2.837569535  | 0.417470235 |
| BnaC06g25810D | 0.283172051  | 0.262821868 | -0.155870911 | 0.2447295 | 0.619314006  | 0.298568548 | -5.790076931 | 0.474607242 | -0.352671618 | 0.266910169 |
| BnaC06g30140D | -0.985644707 | 0.378841717 | 0.82984956   | 0.384077  | 0.625270489  | 0.358494928 | -7.058893689 | 0.629555021 | -0.567040593 | 0.337324756 |
| BnaC06g32560D | 1.165337732  | 0.321731128 | 3.330148602  | 0.5701768 | 1.174497731  | 0.313217708 | -0.959358016 | 0.27125024  | 1.183599938  | 0.335035137 |
| BnaC06g32600D | -4.029747343 | 0.311179066 | 1.429684275  | 0.3089247 | -0.029747343 | 0.299295061 | -4.029747343 | 0.316509918 | -4.029747343 | 0.316335112 |
| BnaC06g35730D | 4.89077093   | 0.378714027 | 5.807354922  | 0.4550222 | 4.297680549  | 0.319974286 | 0            | 0.226982722 | 4.273018494  | 0.334339445 |
| BnaC06g37920D | 0            | 0.22451918  | 0            | 0.2263112 | 0            | 0.21244364  | 0            | 0.226982722 | 0            | 0.223935767 |
| BnaC06g38250D | 0            | 0.22451918  | 7.125843933  | 0.6091686 | 0            | 0.21244364  | 0            | 0.226982722 | 0            | 0.223935767 |
| BnaC06g38580D | -0.116561505 | 0.290537268 | -0.349780341 | 0.3895897 | 0.851524175  | 0.608052415 | -0.230483155 | 0.428420261 | -0.089364474 | 0.286856265 |
| BnaC06g40040D | -1.073373186 | 0.449111011 | 1.949959318  | 0.6638245 | 1.161510179  | 0.556243175 | -0.52368616  | 0.353779193 | 0.180922882  | 0.286528233 |
| BnaC06g40770D | 0            | 0.22451918  | 2.502500341  | 0.2479504 | 0            | 0.21244364  | 0            | 0.226982722 | 0            | 0.223935767 |
| BnaC06g41440D | 3.972332251  | 0.824663602 | 4.050666716  | 0.8172444 | 2.056628861  | 0.628009528 | 3.108387793  | 0.75568442  | 3.519867472  | 0.814325091 |
| BnaC06g42850D | 0.682947056  | 0.392343866 | 0.798156835  | 0.3975263 | 0.527076145  | 0.351623868 | -0.056918429 | 0.241138733 | 0.868622579  | 0.470208531 |
| BnaC06g43980D | 0            | 0.22451918  | 3.058893689  | 0.2596164 | 0            | 0.21244364  | 0            | 0.226982722 | 2.415037499  | 0.247556272 |
| BnaC07g08360D | 0            | 0.22451918  | 0            | 0.2263112 | 0            | 0.21244364  | 0            | 0.226982722 | 0            | 0.223935767 |
| BnaC07g10480D | -2.747648676 | 0.525617317 | -2.827819025 | 0.5       | -0.797230705 | 0.368556043 | -1.182314982 | 0.428420779 | -0.342392197 | 0.307788668 |
| BnaC07g11010D | 0            | 0.22451918  | 2.662965013  | 0.2495666 | 3.584962501  | 0.275137377 | 0            | 0.226982722 | 0            | 0.223935767 |
| BnaC07g13400D | 2.345249169  | 0.720120469 | 0.819516807  | 0.4063193 | 0.74176658   | 0.412512329 | 0.90902634   | 0.455319402 | 0.226965151  | 0.292080559 |
| BnaC07g13470D | 3.807354922  | 0.299596675 | 0            | 0.2263112 | 0            | 0.21244364  | 0            | 0.226982722 | 3.874469118  | 0.307773257 |
| BnaC07g14220D | 0            | 0.22451918  | 0            | 0.2263112 | 0            | 0.21244364  | 0            | 0.226982722 | 0            | 0.223935767 |
| BnaC07g16160D | 1.493030379  | 0.73263632  | -1.116429177 | 0.8215193 | 0.556475334  | 0.500039628 | 0.078634236  | 0.270331378 | 0.053601629  | 0.258900895 |
| BnaC07g16190D | 0.816202824  | 0.441790834 | -1.242473083 | 0.4296801 | -0.215506360 | 0.27242671  | 0.548456291  | 0.374220649 | 1.032983822  | 0.539872398 |
| BnaC07g20040D | -0.881109394 | 0.402426996 | 1.728052802  | 0.6134146 | 1.104825976  | 0.525740604 | -0.232953067 | 0.287034591 | 0.408592962  | 0.350285322 |
| BnaC07g20090D | 1.505235308  | 0.440756103 | 2.325646383  | 0.5407662 | 1.680977636  | 0.472308817 | 1.183307213  | 0.393913576 | 0.873622714  | 0.351416922 |
| BnaC07g22870D | 3.982554866  | 0.644351686 | 0.230297619  | 0.2389834 | 1.861802706  | 0.362871623 | 0.60334103   | 0.262824069 | 2.093976148  | 0.414038008 |
| BnaC07g23080D | 0.620172122  | 0.509768308 | -1.30991113  | 0.6506327 | -0.335694815 | 0.394171158 | -0.61279943  | 0.498148491 | -0.625930144 | 0.553083941 |
| BnaC07g29050D | -0.98403145  | 0.407968315 | -2.225881407 | 0.4885167 | -0.508611615 | 0.328511924 | -0.198631373 | 0.277673571 | -1.177787119 | 0.465006252 |
| BnaC07g29370D | 0.989028882  | 0.299169573 | 2.529253068  | 0.451667  | 1.868495217  | 0.388902832 | 0.909802191  | 0.292807073 | 1.886343218  | 0.415066336 |
| BnaC07g31340D | -1.343888658 | 0.635574078 | 0.550363839  | 0.4416962 | -1.259619741 | 0.634647223 | -1.538704835 | 0.669123604 | -1.515305939 | 0.701336785 |
| BnaC07g31350D | -0.896494376 | 0.531299535 | 1.787643759  | 0.718051  | -0.425506244 | 0.397790517 | -2.292026609 | 0.118865054 | -0.589555784 | 0.48625568  |
| BnaC07g33940D | -5.129283017 | 0.40141428  | -5.129283017 | 0.3895391 | -1.584962501 | 0.300087622 | -5.129283017 | 0.406962204 | -5.129283017 | 0.41341974  |
| BnaC07g38490D | 0.08413205   | 0.248952059 | -0.8259706   | 0.3907125 | -1.056583528 | 0.459579415 | -2.407657969 | 0.581539064 | -0.573907312 | 0.388698087 |
| BnaC07g39680D | 3.053947654  | 0.695172426 | 2.271687718  | 0.5572603 | 0.936921317  | 0.358140477 | 0.988380917  | 0.374806263 | 1.73387631   | 0.536677939 |
| BnaC07g41100D | 0.497499659  | 0.24735186  | 1.420331799  | 0.287116  | -3.502500341 | 0.268900366 | 0            | 0.226982722 | -0.91753784  | 0.248945454 |
| BnaC07g43950D | -2.169925001 | 0.340340889 | -1.422691072 | 0.3402838 | -1.304854582 | 0.303275476 | -2.276840205 | 0.344453397 | 1.858770432  | 0.500206946 |
| BnaC07g45030D | 0            | 0.22451918  | 7.142957954  | 0.6105049 | 0            | 0.21244364  | 0            | 0.226982722 | 0            | 0.223935767 |
| BnaC07g46770D | 0.049605546  | 0.245176389 | -1.831042147 | 0.6417252 | -0.495559947 | 0.419037743 | -1.956010246 | 0.688735073 | -1.492288233 | 0.674411744 |
| BnaC07g46940D | -0.798238911 | 0.484197224 | 0.52673928   | 0.4123824 | -0.252828335 | 0.31945692  | -0.412114104 | 0.376633555 | -0.616768909 | 0.475694811 |
| BnaC07g50590D | 0            | 0.22451918  | 5.727920455  | 0.4468038 | 2.874469118  | 0.244608387 | 0            | 0.226982722 | 0            | 0.223935767 |
| BnaC08g04820D | 1.117569596  | 0.494212107 | -0.49696602  | 0.3096666 | -0.283135612 | 0.276500141 | -0.514141164 | 0.32849211  | -0.773724144 | 0.384640618 |
| BnaC08g06130D | 1.720167722  | 0.68658741  | 2.30243001   | 0.7345165 | 0.739209288  | 0.46713736  | 1.26350213   | 0.603603608 | 0.349726547  | 0.359690373 |
| BnaC08g07150D | 4.64385619   | 0.551107674 | 0            | 0.2263112 | 4.564784619  | 0.340631495 | 0            | 0.226982722 | 4.584962501  | 0.361596921 |
| BnaC08g08940D | 0.92741298   | 0.357106257 | -1.454291247 | 0.5630614 | 0.159772887  | 0.284421343 | -0.366695604 | 0.259122371 | 0.182412789  | 0.311482881 |
| BnaC08g12710D | 0.579996248  | 0.277699899 | 0.638491897  | 0.2753609 | -0.622632919 | 0.253971609 | -5.014950341 | 0.394695128 | -1.014950341 | 0.289947251 |
| BnaC08g12880D | 1.771468442  | 0.486363556 | 3.766750444  | 0.7355336 | 0.630191755  | 0.29705828  | -2.902303326 | 0.380554528 | -1.4119777   | 0.345138082 |
| BnaC08g15650D | 3.36923381   | 0.275018493 | 7.815916936  | 0.6938933 | 0            | 0.21244364  | 0            | 0.226982722 | 0            | 0.223935767 |
| BnaC08g18660D | -0.67656202  | 0.366896034 | -1.577428828 | 0.4068807 | -1.193724536 | 0.39713005  | -1.1428006   | 0.398136162 | -0.700911881 | 0.355042886 |
| BnaC08g20020D | -4.018859027 | 0.6368861   | -0.44481277  | 0.3325254 | -1.812830512 | 0.567072634 | -5.044394119 | 0.70525758  | -0.31259023  | 0.31063091  |
| BnaC08g21640D | 0.352166672  | 0.396302265 | 1.658620437  | 0.7250013 | 1.105826019  | 0.669920568 | 1.2          |             |              |             |

|               |              |             |              |           |              |             |              |             |              |             |
|---------------|--------------|-------------|--------------|-----------|--------------|-------------|--------------|-------------|--------------|-------------|
| BnaC09g45000D | -2.230642844 | 0.54017181  | -1.607575739 | 0.4672805 | 0.220146981  | 0.278188735 | -0.597355896 | 0.360617229 | -1.273392492 | 0.494253936 |
| BnaC09g46030D | 0.015767316  | 0.22451918  | -2.807354922 | 0.3143119 | 0.192645078  | 0.231084223 | -1.081529885 | 0.382973355 | -2.115477217 | 0.3198532   |
| BnaC09g49920D | 0.940496377  | 0.583637148 | 3.909963219  | 0.8677833 | -0.916160407 | 0.550930818 | 0.285758358  | 0.36327285  | -0.242542354 | 0.348420603 |
| BnaC09g50850D | -0.804947086 | 0.454929726 | -2.100913387 | 0.5984844 | -0.679572145 | 0.433552608 | -1.695094417 | 0.60155562  | -2.911718358 | 0.706860492 |
| BnaC09g51170D | 1.014355293  | 0.328177287 | -5.058893689 | 0.3821991 | 0.01449957   | 0.21244364  | -5.058893689 | 0.398891296 | -1.514573173 | 0.31367413  |
| BnaC09g45890D | -0.599141436 | 0.473898341 | -0.587048364 | 0.4510066 | -0.735042855 | 0.529210257 | -1.810083196 | 0.719829864 | -0.279325252 | 0.379136725 |
| BnaC09g4890D  | 0            | 0.22451918  | 0            | 0.2263112 | 4.169925001  | 0.310820212 | 0            | 0.226982722 | 0            | 0.223935767 |
| BnaC09g5070D  | 0.921997488  | 0.311469671 | 0.873087888  | 0.2938374 | -0.062060968 | 0.217751594 | 1.378511623  | 0.373639438 | -4.984891308 | 0.39871297  |
| BnaC09g5080D  | -3.938599455 | 0.305333932 | 2.816288047  | 0.4418921 | -3.938599455 | 0.293230036 | -0.03170886  | 0.226982722 | 0.868755467  | 0.276231551 |
| BnaC09g50370D | -0.601450624 | 0.247622319 | 3.271887412  | 0.4917717 | 1.529253068  | 0.313105428 | 1.2410081    | 0.302018387 | 0.862496476  | 0.272891789 |
| BnaC09g07330D | 0            | 0.22451918  | 0            | 0.2263112 | 0            | 0.21244364  | 0            | 0.226982722 | 0            | 0.223935767 |
| BnaC09g07960D | -3.459431619 | 0.281262109 | -0.090197809 | 0.2311811 | 0            | 0.21244364  | -3.459431619 | 0.285733471 | 0            | 0.223935767 |
| BnaC09g08620D | -1.677052693 | 0.573606855 | -2.668924812 | 0.6100338 | 0.10445521   | 0.252844412 | -1.46870121  | 0.554028207 | -1.597763783 | 0.605097925 |
| BnaC09g09130D | 0.884522783  | 0.296639984 | 2.1740294    | 0.4276216 | -4.700439718 | 0.351890257 | -4.700439718 | 0.367996847 | 0.884522783  | 0.303136778 |
| BnaC09g17120D | 0.097202159  | 0.24481093  | -1.665882496 | 0.3963859 | 1.651877965  | 0.568833879 | 0.803602787  | 0.385921924 | 0.96906814   | 0.448283226 |
| BnaC09g24520D | -1.496425826 | 0.290301701 | 0.26607486   | 0.2439964 | 0.296132094  | 0.237506164 | 1.621031755  | 0.387181215 | -1.60334103  | 0.300534538 |
| BnaC09g27470D | 0.158147834  | 0.247261263 | -0.93128725  | 0.2955062 | -0.898120386 | 0.294037743 | 0.286304185  | 0.26587983  | -0.313157885 | 0.263731111 |
| BnaC09g27900D | 4.922832139  | 0.380200067 | 0            | 0.2263112 | 2.502500341  | 0.237869421 | 2.502500341  | 0.253714027 | 0            | 0.223935767 |
| BnaC09g31550D | 4.273018494  | 0.327631301 | 9.321928095  | 0.8536361 | 0            | 0.21244364  | 3.36923381   | 0.279293917 | 0            | 0.223935767 |
| BnaC09g33070D | 2.025776906  | 0.78882886  | 1.381788978  | 0.6751121 | 1.509688307  | 0.732576878 | -0.154693151 | 0.303627726 | -0.263814874 | 0.374484836 |
| BnaC09g36390D | 0.155448124  | 0.296283322 | -0.107372723 | 0.2691535 | -0.87367428  | 0.526009194 | -1.549135544 | 0.643829917 | 2.0870169    | 0.728041671 |
| BnaC09g37790D | 1.3379805    | 0.560357885 | 0.234591358  | 0.2786885 | 0.177750565  | 0.26418243  | 0.16655815   | 0.273575001 | 0.012556172  | 0.226885854 |
| BnaC09g38100D | 0.149576356  | 0.241935697 | -0.828728573 | 0.2751704 | -2.894817763 | 0.340107524 | -1.468553009 | 0.316980168 | -0.765534746 | 0.2847846   |
| BnaC09g39660D | 2.337441094  | 0.567499736 | 2.282399731  | 0.5271034 | -0.232173442 | 0.239285022 | 1.152490408  | 0.383863468 | 1.870031418  | 0.525874899 |
| BnaC09g39690D | 1.336224116  | 0.542023319 | 0.420266014  | 0.3112253 | -0.191790148 | 0.259750696 | -0.609108588 | 0.343031953 | 0.311112338  | 0.309930783 |
| BnaC09g47540D | -2.040641984 | 0.374694089 | 0.906890596  | 0.3219733 | -5.584962501 | 0.439688348 | -5.584962501 | 0.453161876 | -5.584962501 | 0.462996231 |
| BnaC09g49280D | 7.406559345  | 0.668694301 | 0            | 0.2263112 | 0            | 0.21244364  | 0            | 0.226982722 | 0            | 0.223935767 |
| BnaC09g50450D | 5.961931959  | 0.489071471 | 0            | 0.2263112 | 5.938599455  | 0.480494206 | 0            | 0.226982722 | 0            | 0.223935767 |
| BnaC09g50520D | -0.219588498 | 0.334147909 | 0.682476996  | 0.5045902 | 0.115867552  | 0.282376096 | -0.34260642  | 0.38612887  | -0.403244077 | 0.446568213 |
| BnaC09g63180D | 1.880929518  | 0.697580929 | 2.631680353  | 0.7595504 | 0.276498375  | 0.306300416 | -0.113683936 | 0.262940752 | 0.885419702  | 0.528021417 |
| BnaC09g67070D | 0.109527105  | 0.27193191  | 1.502108846  | 0.6643616 | 0.359238988  | 0.373104459 | -0.372203661 | 0.387968368 | -0.514192966 | 0.445575311 |
| BnaC09g69090D | -1.182415946 | 0.36318539  | 1.750171133  | 0.517804  | 0.99446187   | 0.401497339 | 0.857790377  | 0.378150428 | 1.091035076  | 0.453756296 |
| BnaC09g69830D | 0.85601268   | 0.266971802 | 4.315041709  | 0.633225  | 0.85561091   | 0.25511862  | -3.807354922 | 0.304259572 | 0.855610091  | 0.269703935 |
| BnaC09g71740D | 1.03611188   | 0.448041055 | -0.979708596 | 0.3484933 | 0.226473598  | 0.262537867 | -0.173505526 | 0.263084655 | -1.763084655 | 0.458628342 |
| BnaC09g73120D | 0            | 0.22451918  | 3.36923381   | 0.2716061 | 0            | 0.21244364  | 0            | 0.226982722 | 0            | 0.223935767 |
| BnaC09g73930D | -0.694063938 | 0.312583659 | -0.32334877  | 0.2659701 | 0.523067967  | 0.305430801 | -0.309204587 | 0.27337139  | -0.174903496 | 0.257236518 |
| BnaC09g75020D | 3.53003629   | 0.777977386 | 5.287526641  | 0.892749  | -3.442943496 | 0.451182676 | -1.23349013  | 0.369135052 | -6.412943496 | 0.570042534 |
| BnaC09g77210D | -1.742503378 | 0.430362552 | -3.398549376 | 0.4684825 | 0.502500341  | 0.319153105 | 0.54857835   | 0.33857524  | 2.096215315  | 0.67953917  |
| BnaC09g78540D | -0.839535328 | 0.247827063 | -1           | 0.2468635 | -3.502500341 | 0.268900366 | -3.502500341 | 0.285733471 | -3.502500341 | 0.284377077 |
| BnaC09g01150D | 0            | 0.22451918  | 0            | 0.2263112 | 0            | 0.21244364  | 0            | 0.226982722 | 0            | 0.223935767 |

# BnbZIP

| GeneID        | log2(Cold/Control)Prob. | log2(Heat/Control)Prob. | Prob.        | log2(Drought/Control)Prob. | log2(Salt/Control)Prob. | log2(ABA/Control)Prob. |
|---------------|-------------------------|-------------------------|--------------|----------------------------|-------------------------|------------------------|
| BnaU09g03970D | 2.415037499             | 0.246506129             | 3.841302254  | 0.2947973                  | 2.415037499             | 0.234239054            |
| BnaU09g03790D | 0                       | 0.22451918              | 5.523561956  | 0.4262853                  | 4.029747343             | 0.299295061            |
| BnaC09g73390D | -4.754887502            | 0.707052027             | -2.931765264 | 0.611456                   | -0.979593789            | 0.475468051            |
| BnaC09g67350D | -2.502500341            | 0.250160714             | 1.270089163  | 0.2549843                  | -2.502500341            | 0.237869421            |
| BnaC09g41320D | -0.456525887            | 0.335094579             | 0.677807457  | 0.3913884                  | 0.047851518             | 0.228404928            |
| BnaC09g38290D | 0.036994207             | 0.227088397             | -1.874469118 | 0.2890842                  | -1.179323699            | 0.268719839            |
| BnaC09g36700D | -2.101086125            | 0.562242418             | -2.450420377 | 0.5501691                  | 0.463042872             | 0.360591711            |
| BnaC09g30720D | -0.141959993            | 0.291404681             | -0.549463819 | 0.4265142                  | -0.167200061            | 0.296991191            |
| BnaC09g29250D | 0.327164743             | 0.334059847             | 1.459557119  | 0.6099986                  | -0.619896291            | 0.39834531             |
| BnaC09g27030D | 0.673447802             | 0.508015869             | 0.824495627  | 0.5329177                  | 0.40465277              | 0.493400685            |
| BnaC09g22960D | -0.683972507            | 0.268878351             | -0.155278225 | 0.2384837                  | 0.689070904             | 0.279060552            |
| BnaC09g21800D | 0.561213898             | 0.359457008             | -7.351675438 | 0.6366661                  | 0.132140339             | 0.24909516             |
| BnaC09g21630D | 5.594946589             | 0.447591937             | 6.528779665  | 0.5356036                  | 0                       | 0.21244364             |
| BnaC09g21210D | 0                       | 0.22451918              | 3.415037499  | 0.2749172                  | 0.268900366             | 0.223983577            |
| BnaC09g20400D | 0.359328067             | 0.257769294             | -0.928916902 | 0.274314                   | -0.874469118            | 0.26718095             |
| BnaC09g20200D | -0.596502634            | 0.500209148             | -2.047363392 | 0.7509489                  | -0.426577632            | 0.40894801             |
| BnaC09g04010D | 0                       | 0.22451918              | 0            | 0.2263112                  | 0                       | 0.21244364             |
| BnaC09g01910D | -1.856189975            | 0.762051323             | 1.257114879  | 0.6681879                  | -0.367618003            | 0.414302195            |
| BnaC09g48720D | 0                       | 0.22451918              | 3.874469118  | 0.2987024                  | 3                       | 0.249962574            |
| BnaC09g48640D | -0.503402871            | 0.370436172             | 1            | 0.5115736                  | 0.167215714             | 0.276634778            |
| BnaC09g46670D | -0.626890971            | 0.374489239             | -1.565828334 | 0.4803819                  | -0.13308014             | 0.25491827             |
| BnaC09g45380D | -0.723187847            | 0.515895241             | -1.255865282 | 0.6171955                  | 0.212681815             | 0.326057188            |
| BnaC09g42010D | -3.502500341            | 0.281262109             | -3.502500341 | 0.2775591                  | 0.268900366             | 0.302500341            |
| BnaC09g22200D | -0.685126663            | 0.290990789             | -0.537373042 | 0.2713485                  | -0.671051477            | 0.278739124            |
| BnaC09g09660D | 0.94236882              | 0.627624256             | -0.145147773 | 0.3037136                  | 0.314281422             | 0.39318486             |
| BnaC09g09560D | -2.781563039            | 0.611328331             | 0.259777757  | 0.2969988                  | -1.296938567            | 0.508114939            |
| BnaC09g09130D | 0.162699677             | 0.293394889             | 0.573735245  | 0.4252417                  | -0.838633067            | 0.500614234            |
| BnaC09g06840D | -0.271162287            | 0.275408169             | -0.074853995 | 0.2329208                  | -0.049468676            | 0.226662774            |
| BnaC09g02690D | 0.00833784              | 0.229827134             | 0.199202543  | 0.3233471                  | 0.313290359             | 0.247935432            |
| BnaC09g00090D | -0.115785025            | 0.29964366              | -1.09986547  | 0.5610404                  | -0.086252269            | 0.25534538             |
| BnaC08g44990D | -1.407747463            | 0.73850383              | -1.285128177 | 0.3714907                  | -1.567527907            | 0.409520431            |
| BnaC08g43230D | -0.72935241             | 0.257346596             | -2.276840205 | 0.2843575                  | -4.392317423            | 0.327201997            |
| BnaC08g40240D | -0.086100737            | 0.34520818              | -7.048032696 | 0.5986253                  | 0.145081932             | 0.248817764            |
| BnaC08g35930D | 2.491853096             | 0.31877884              | 4.098032083  | 0.4596212                  | 0                       | 0.21244364             |
| BnaC08g32220D | 0.417636634             | 0.436725052             | 1.50113071   | 0.7102553                  | -0.297544329            | 0.384204622            |
| BnaC08g29000D | -3.301364202            | 0.805633158             | 0.405673533  | 0.4012844                  | -0.992389684            | 0.604796312            |
| BnaC08g27660D | -0.885653333            | 0.506109321             | -0.014766711 | 0.2304348                  | 0.383784212             | 0.054066846            |
| BnaC08g25370D | 0.583168018             | 0.491506393             | 0.953208062  | 0.5869615                  | -0.248949577            | 0.348179282            |
| BnaC08g21370D | 3.544320516             | 0.285033376             | 0            | 0.2263112                  | 0                       | 0.21244364             |
| BnaC08g20170D | 3.792362208             | 0.75431285              | 2.682809824  | 0.5902528                  | 0.670935724             | 0.300378227            |
| BnaC08g05660D | 0.002107663             | 0.22451918              | 0.54359718   | 0.357469                   | 0.18577383              | 0.27104028             |
| BnaC08g01910D | -1.078097423            | 0.534491793             | -0.143580921 | 0.2754544                  | -0.287325385            | 0.328091426            |
| BnaC08g01660D | 0.268105395             | 0.273944133             | 1.32395863   | 0.450804                   | 0.49410907              | 0.306502959            |
| BnaC07g47540D | -0.535127262            | 0.440749498             | -1.108951663 | 0.5661722                  | 0.121704907             | 0.27653366             |
| BnaC07g46750D | 1.067298389             | 0.383176582             | 1.52144605   | 0.4317936                  | -0.024522319            | 0.214971028            |
| BnaC07g46120D | 0.955493615             | 0.570148209             | -2.292063454 | 0.657517                   | -0.437246071            | 0.387912131            |
| BnaC07g44670D | 0.726943675             | 0.486574906             | 2.913232122  | 0.8052305                  | 0.686333036             | 0.482347916            |
| BnaC07g29750D | -1.691590478            | 0.609373349             | -1.617491486 | 0.5698884                  | 0.103126114             | 0.257406638            |
| BnaC07g27440D | -1.211092798            | 0.680855701             | 0.01078792   | 0.2322136                  | -0.297207395            | 0.383407747            |
| BnaC07g27220D | -2.73435621             | 0.832760929             | 1.473392691  | 0.7072436                  | -0.896473265            | 0.621642626            |
| BnaC07g26080D | -5.183221824            | 0.405451936             | -5.183221824 | 0.3931739                  | -0.638901308            | 0.25981894             |
| BnaC06g38430D | 0.678071905             | 0.251006612             | 1.115477217  | 0.2670973                  | 1.975752454             | 0.319452517            |
| BnaC06g30310D | 0.884522783             | 0.244410247             | 0            | 0.2263112                  | 0.206951204             | 0.270635194            |
| BnaC06g22430D | -0.193177733            | 0.281105798             | -1.283306801 | 0.4560811                  | 0.097297201             | 0.246385043            |
| BnaC06g20630D | 0.050209291             | 0.250217954             | -1.055354144 | 0.6062112                  | 0.215448212             | 0.338401317            |
| BnaC06g18530D | -0.241574934            | 0.349175737             | 2.338754102  | 0.7955194                  | 0.32353676              | 0.232353676            |
| BnaC06g16270D | -5.474111514            | 0.706891314             | -0.222392421 | 0.2830322                  | -0.596367264            | 0.380219892            |
| BnaC06g15230D | -0.462034979            | 0.310368893             | 1.183730801  | 0.46544                    | 0.010366714             | 0.213982528            |
| BnaC06g02640D | 4.2360525               | 0.871864983             | 2.108676622  | 0.6828525                  | -0.019024826            | 0.217819842            |
| BnaC06g01290D | -1.852646424            | 0.594455599             | -0.315528972 | 0.5435167                  | -0.104886523            | 0.500997305            |
| BnaC06g00400D | -0.750189603            | 0.48348392              | -1.132498506 | 0.3451197                  | -0.21084557             | 0.308143119            |

|               |              |             |              |           |              |              |              |             |              |             |
|---------------|--------------|-------------|--------------|-----------|--------------|--------------|--------------|-------------|--------------|-------------|
| BnaC05g51490D | -0.556736078 | 0.483649037 | 1.376611148  | 0.6866216 | -0.243936534 | 0.348394184  | 0.039404647  | 0.246369633 | -0.257800773 | 0.384429268 |
| BnaC05g40810D | 0.177304532  | 0.257760488 | -0.514573173 | 0.2853702 | -0.587739585 | 0.295334461  | -0.315006861 | 0.275520448 | -0.709484858 | 0.32801217  |
| BnaC05g35930D | -0.46531326  | 0.347407887 | -2.784852924 | 0.5704454 | 0.952112671  | 0.510257054  | -0.575399558 | 0.373800151 | 0.377034759  | 0.357933531 |
| BnaC05g33570D | 0.489957234  | 0.411171239 | 0.40917458   | 0.3662312 | 0.289810534  | 0.336307637  | 0.6120121    | 0.453754095 | 0.713879285  | 0.52839348  |
| BnaC05g24270D | 0.25352732   | 0.302414668 | 0.933647054  | 0.4679145 | 0.132325609  | 0.257958628  | 0.285948798  | 0.314355913 | 0.469090403  | 0.388764134 |
| BnaC05g17700D | 0.227680899  | 0.294526489 | 1.066144544  | 0.5018801 | -1.443755008 | 0.507852954  | -0.411333531 | 0.332705889 | -0.764422557 | 0.430182025 |
| BnaC05g15020D | 3.248376741  | 0.834368065 | -0.811629577 | 0.4223797 | 0.80996582   | 0.499327556  | 1.002436985  | 0.549955529 | 0.665978576  | 0.486596921 |
| BnaC05g06030D | -0.988859442 | 0.296584945 | -0.381870635 | 0.2554687 | -0.022542569 | 0.214971028  | -0.472068444 | 0.269349484 | 0.865289691  | 0.334762144 |
| BnaC05g04130D | -0.171062896 | 0.293016221 | 0.645972354  | 0.4446991 | -0.139738785 | 0.274460888  | -0.707488393 | 0.455728891 | -0.291438121 | 0.351804396 |
| BnaC05g02200D | -0.811927652 | 0.451475483 | 3.529010394  | 0.8370694 | 0.302624465  | 0.328983057  | -0.401405634 | 0.353741766 | 0.374819391  | 0.379112508 |
| BnaC04g56840D | 2.114257179  | 0.465994751 | 2.849757364  | 0.5405549 | 3.02358682   | 0.600245694  | 0.786826109  | 0.297643894 | 1.422942697  | 0.388528567 |
| BnaC04g56770D | 1.567040593  | 0.293575417 | -1.432959407 | 0.248831  | 3.833827133  | 0.52396835   | -0.584962501 | 0.243798214 | 1.05246742   | 0.268451249 |
| BnaC04g52770D | -2.857042046 | 0.729256931 | 0.603626345  | 0.4436005 | -1.071892918 | 0.571671686  | -1.866144253 | 0.673674222 | -0.325219237 | 0.378672197 |
| BnaC04g52290D | 0            | 0.22451918  | 2.807354922  | 0.2544626 | 0            | 0.21244364   | 0            | 0.226982722 | 0            | 0.223935767 |
| BnaC04g52230D | 0.652560579  | 0.451992849 | 0.520735367  | 0.3904836 | -0.106014569 | 0.257362006  | -0.241685807 | 0.311148244 | -0.395648514 | 0.378020536 |
| BnaC04g47290D | 0            | 0.22451918  | 3.874469118  | 0.2978024 | 5.48112669   | 0.428526454  | 0            | 0.226982722 | 0            | 0.223935767 |
| BnaC04g44430D | 0.790076931  | 0.269430942 | 1.156504486  | 0.2888729 | 2.357552005  | 0.412323731  | -0.061400545 | 0.23086847  | 1.357552005  | 0.322023935 |
| BnaC04g42420D | 1.035754713  | 0.548674222 | 1.070006193  | 0.5300072 | 0.442265233  | 0.371407059  | 0.204662043  | 0.29761087  | 0.156153581  | 0.289458505 |
| BnaC04g33670D | -0.103674405 | 0.269252615 | 1.865346065  | 0.7279272 | 0.064695768  | 0.24390609   | 0.129715544  | 0.2870478   | 0.21744002   | 0.340435556 |
| BnaC04g24820D | -1.006679156 | 0.456428232 | -0.623796895 | 0.3643026 | -0.512670508 | 0.357691359  | -0.348832279 | 0.324326764 | -0.278442951 | 0.318091955 |
| BnaC04g09600D | -0.071127846 | 0.246928828 | 0.360106881  | 0.3271227 | -0.102492017 | 0.249383564  | -0.343500116 | 0.327246028 | -0.216252762 | 0.303654144 |
| BnaC04g09030D | -0.430634354 | 0.304169309 | 1.506495854  | 0.5236061 | -0.220007801 | 0.260545458  | 1.265716827  | 0.511776128 | 1.292270246  | 0.550869175 |
| BnaC04g01480D | -0.33616911  | 0.34406152  | -0.77525855  | 0.4387065 | -0.080849682 | 0.248179312  | -0.279585582 | 0.327626898 | -0.268530394 | 0.339538995 |
| BnaC04g01070D | -0.670064711 | 0.473180633 | 2.136223172  | 0.7595019 | 0.421929471  | 0.407552221  | 1.158817227  | 0.643981824 | 1.840853544  | 0.78400745  |
| BnaC03g76870D | 0            | 0.22451918  | 0            | 0.2263112 | 0            | 0.21244364   | 3.906890596  | 0.310144334 | 0            | 0.223935767 |
| BnaC03g65930D | 0.795322367  | 0.476874846 | -1.140862536 | 0.4692751 | -0.811554911 | 0.438981648  | -1.662499101 | 0.565064814 | -0.525397947 | 0.399027792 |
| BnaC03g65600D | -1.042709082 | 0.504392106 | 0.894826831  | 0.4963564 | -0.788593994 | 0.458306915  | 0.072597129  | 0.253584135 | -0.401790175 | 0.378020536 |
| BnaC03g61840D | 0.325369403  | 0.380790095 | 1.262012098  | 0.6522839 | -0.228243961 | 0.332829177  | -0.165333561 | 0.310604459 | -0.118302498 | 0.297135334 |
| BnaC03g60240D | -0.276673265 | 0.330568178 | -0.506254017 | 0.354088  | -0.48069259  | 0.396414544  | -0.426659419 | 0.379240199 | -0.323309892 | 0.365634577 |
| BnaC03g54810D | 0            | 0.22451918  | 0            | 0.2263112 | 0            | 0.21244364   | 3.969626351  | 0.313622794 | 3.36923381   | 0.277510656 |
| BnaC03g49070D | 0.449606013  | 0.395599968 | 0.30194372   | 0.329769  | -0.431814865 | 0.376536687  | 0.276261196  | 0.335559107 | 0.260062839  | 0.345791416 |
| BnaC03g46620D | -0.323254101 | 0.350313942 | -1.438869515 | 0.5828776 | 0.418181889  | 0.397772905  | -0.353416072 | 0.361544084 | -0.361907533 | 0.389136197 |
| BnaC03g37460D | -0.541764811 | 0.349805382 | 0.917666807  | 0.4461763 | -0.1379421   | 0.254537409  | -0.295854583 | 0.30287039  | -0.567527907 | 0.374420991 |
| BnaC03g26660D | 0            | 0.22451918  | 0            | 0.2263112 | 2.662965013  | 0.239348868  | 0            | 0.226982722 | 0            | 0.223935767 |
| BnaC03g23710D | -3.796416354 | 0.829909912 | -0.804731623 | 0.5237328 | -1.743504831 | 0.730390732  | -2.432004928 | 0.78190056  | -0.885771901 | 0.619328789 |
| BnaC03g22760D | 2.502500341  | 0.50160714  | 2.415037499  | 0.244965  | 2.502500341  | 0.237869422  | 2.502500341  | 0.253714027 | 2.502500341  | 0.251349554 |
| BnaC03g21720D | 0.729845964  | 0.543504967 | 2.274075283  | 0.7856058 | 1.47175039   | 0.729857956  | 0.599519415  | 0.497655342 | -0.136621546 | 0.311542323 |
| BnaC03g10840D | -3.459431619 | 0.281262109 | -3.459431619 | 0.2775591 | 1.613817363  | 0.300087622  | -0.459431619 | 0.247231116 | -0.289506817 | 0.23721776  |
| BnaC03g07400D | -5.745954377 | 0.6861838   | 0.514573173  | 0.2809429 | 0.16093821   | 0.2356502513 | -1.400179541 | 0.336555107 | 0.902702799  | 0.38008855  |
| BnaC03g07230D | 0            | 0.22451918  | 4.321928095  | 0.3260616 | 3.415037499  | 0.266500669  | 0            | 0.226982722 | 3.36923381   | 0.277510656 |
| BnaC02g43620D | -0.996276914 | 0.378104195 | 1.148644081  | 0.4518123 | 0.355094959  | 0.293132904  | 0.907635982  | 0.423936348 | 0.331588206  | 0.304123076 |
| BnaC02g41050D | -0.03974174  | 0.341379577 | 0.296544344  | 0.3578146 | -0.062517998 | 0.247917327  | 0.297191147  | 0.370561661 | -0.131345436 | 0.304255169 |
| BnaC02g39310D | -0.38358604  | 0.420290429 | 0.037993132  | 0.2466294 | -0.287208555 | 0.381963525  | 0.011594013  | 0.257806299 | -0.522033183 | 0.528210751 |
| BnaC02g38190D | -4.736965594 | 0.365418824 | -0.255838904 | 0.2417045 | -1.152003093 | 0.272033182  | -1.036525876 | 0.281693614 | -1.112474729 | 0.283910582 |
| BnaC02g35400D | -3.700439718 | 0.29336847  | -3.700439718 | 0.2890842 | -1.154772127 | 0.2432500626 | -3.700439718 | 0.298240516 | -3.700439718 | 0.297287242 |
| BnaC02g06270D | -0.983716587 | 0.517634471 | -4.925017214 | 0.756532  | 0.303801477  | 0.341818134  | -0.0256082   | 0.235967276 | 0.381280229  | 0.399708074 |
| BnaC02g01780D | -1.125190282 | 0.464460266 | 0.751135367  | 0.4180008 | -0.307943865 | 0.301575874  | -0.699971387 | 0.392610254 | 0.162829424  | 0.282428934 |
| BnaC02g00560D | -1.22571278  | 0.545950896 | -0.792753372 | 0.4346248 | -0.2397424   | 0.305527669  | -0.363565385 | 0.340040416 | 0.159940913  | 0.29742964  |
| BnaC01g43800D | 0.239276915  | 0.281576931 | 1.406174223  | 0.5169058 | 1.545880335  | 0.584414298  | 0.577445651  | 0.360324421 | 1.817873905  | 0.665011096 |
| BnaC01g30400D | -1.411598415 | 0.507249727 | -2.591865361 | 0.5649481 | -0.375416079 | 0.323186357  | -0.39339382  | 0.332859999 | -0.548415105 | 0.388365652 |
| BnaC01g04330D | 1.262658263  | 0.473137853 | 1.424129062  | 0.644224  | 0.277627996  | 0.335616348  | 1.525326881  | 0.69872794  | 1.692665495  | 0.758834126 |
| BnaC01g03810D | -0.091660188 | 0.259231128 | -1.486877501 | 0.5577821 | 0.064681841  | 0.240121614  | -0.027445882 | 0.256478174 | 1.33958147   | 0.690712072 |
| BnaC01g03460D | 1.03072194   | 0.494733876 | 0.72882152   | 0.3941172 | 0.03539086   | 0.223402991  | 0.060803279  | 0.243034274 | 0.323837685  | 0.323679506 |
| BnaC01g02720D | -0.06871275  | 0.228660309 | 0.618129365  | 0.2688982 | -1.10433666  | 0.271584064  | -1.033947332 | 0.284659111 | -1.033947332 | 0.286499613 |
| BnaC01g02130D | 0.410441581  | 0.422791398 | 2.133232102  | 0.7761193 | -0.410611764 | 0.42398244   | 0.002806619  | 0.228197982 | 0.200094004  | 0.34918014  |
| BnaC01g01320D | 0.190301137  | 0.275295889 | 2.131040863  | 0.6631706 | -0.14636501  | 0.252553806  | -0.41592998  | 0.317431488 | -0.384143491 | 0.320577512 |
| BnaAnng39310D | 0.251731757  | 0.305177622 | 1.81400277   | 0.6607335 | 0.815831281  | 0.478836433  | 0.642246937  | 0.423544331 | 0.017584312  | 0.231134859 |
| BnaAnng26560D | 0.660011695  | 0.459984501 | 2.233727491  | 0.7456849 | 0.577403084  | 0.439560657  | 1.585945598  | 0.693943957 | 1.8552995    | 0.762218641 |
| BnaAnng11690D | 0.652945005  | 0.43617026  | 0.039048726  | 0.2369995 | 0.498238789  | 0.390052045  | 0.237328692  | 0.308250995 | 0.07836165   | 0.258189792 |
| BnaAnng07530D | -0.490718699 | 0.317561379 | 1.545923144  | 0.541332  | -0.153103967 | 0.250112279  | 0.934142918  | 0.442281782 | 0.677659176  | 0.403072053 |
| BnaAnng05020D | -4.247927513 | 0.327631301 | -4.247927513 | 0.3211411 | -0.925999419 | 0.249227853  | 0.593374741  | 0.265875163 | -4.247927513 | 0.34339445  |
| BnaAnng04720D | -0.954833684 | 0.347742524 | 1.232552288  | 0.4341404 | 0.665913392  | 0.341153264  | 0.57985561   | 0.332386664 | 0.89151537   | 0.412529941 |
| BnaAnng01920D | -0.625192346 | 0.358741502 | -0.514573173 | 0.3236751 | 0.023846742  | 0.217819842  | -0.845114398 | 0.396247266 | -0.330973234 | 0.341522439 |
| BnaA10g28780D | -0.100674493 | 0.271652313 | -0.422496057 | 0.3876017 | 0.180689457  | 0.307150217  | 0.648884892  | 0.439815209 | 1.027044538  | 0.665816866 |
| BnaA10g24100D | 0            | 0.22451918  | 3.841302254  | 0.2947973 | 0            | 0.21244364   | 0            | 0.226982722 | 0            | 0.223935767 |
| BnaA10g24020D | -0.167186919 | 0.280782169 | 0.713089618  | 0.4286265 | -0.011741225 | 0.21572396   | 0.32105081   | 0.330918225 | 0.023199616  | 0.231867977 |
| BnaA10g22150D | -0.294124984 | 0.295153933 | -1.9878458   | 0.4834135 | 0.002439045  | 0.21244364   | -1.002443176 | 0.41214023  | -0.92624355  | 0.430466026 |
| BnaA10g21200D | -0.360100497 | 0.396278048 | -1.06270446  | 0.5971217 | 0.035766204  | 0.236200641  | -0.020872278 | 0.236286052 | 0.133089004  | 0.307826095 |
| BnaA10g18440D | 0            | 0.22451918  | 3.459431619  | 0.2775591 | 4.415037499  | 0.327201997  | 0            | 0.226982722 | 3.502500341  | 0.284370707 |
| BnaA10g13430D | 0.795322367  | 0.476874846 | -1.140862536 | 0.4692751 | -0.811554911 | 0.438981648  | -1.662499101 | 0.565064814 | -0.525397947 | 0.399027792 |
| BnaA10g04020D | 0.344187173  | 0.333562295 | -0.08871172  | 0.2518141 | -0.361253752 | 0.324148438  | -0.685156789 | 0.405068865 | -0.39116557  | 0.353660309 |
| BnaA10g02300D | -0.821431918 | 0.485477099 | 2.507541901  | 0.7807844 | -0.931       |              |              |             |              |             |

|               |              |             |              |           |              |             |              |             |              |             |
|---------------|--------------|-------------|--------------|-----------|--------------|-------------|--------------|-------------|--------------|-------------|
| BnaA07g19330D | 0.817894875  | 0.533538518 | 2.728835549  | 0.8015957 | -0.075345125 | 0.251261492 | -0.103873923 | 0.270844341 | 0.293042281  | 0.369876977 |
| BnaA07g16990D | -2.196397213 | 0.329159181 | -5.196397213 | 0.3956638 | -5.196397213 | 0.399041002 | -0.781359714 | 0.280476153 | -5.196397213 | 0.420514988 |
| BnaA07g01890D | 0.501951897  | 0.475032143 | -1.888896949 | 0.5647726 | 0.086857405  | 0.271502607 | -0.126279459 | 0.301465797 | 0.405624559  | 0.47544119  |
| BnaA06g39730D | -0.801454321 | 0.303262267 | -0.886343218 | 0.2980732 | -1.386416821 | 0.337573532 | -1.306246473 | 0.342687749 | -5.930737338 | 0.50404426  |
| BnaA06g37290D | -0.973788317 | 0.547163954 | -1.07928891  | 0.5438924 | -0.134475831 | 0.277512857 | -0.066537002 | 0.257914597 | -0.023332504 | 0.235425693 |
| BnaA06g37000D | 2.415037499  | 0.246506129 | 0            | 0.2263112 | 0            | 0.21244364  | 0            | 0.226982722 | 0            | 0.223935767 |
| BnaA06g36330D | 0.490520454  | 0.43887157  | 1.039883396  | 0.5922518 | 0.012671436  | 0.217797827 | 0.024021723  | 0.235410282 | -0.093711679 | 0.277330128 |
| BnaA06g33560D | -1.067976794 | 0.346130984 | -6.315904307 | 0.5125004 | 0.796100718  | 0.353840836 | -6.315904307 | 0.538401758 | -0.751119688 | 0.325088503 |
| BnaA06g29500D | -2.164245905 | 0.801419564 | 1.828795733  | 0.7537911 | -0.530497474 | 0.494397038 | -0.623148668 | 0.518876149 | -0.978282539 | 0.67941148  |
| BnaA06g29270D | -1.273898277 | 0.694553788 | -0.085149669 | 0.2730327 | -0.240238284 | 0.353713146 | -0.326456009 | 0.395551534 | -0.562384757 | 0.542005706 |
| BnaA06g27230D | -2.001205763 | 0.608259361 | -1.075460317 | 0.4746094 | -0.157773076 | 0.273230829 | -0.68993206  | 0.424220209 | -0.75556562  | 0.470758921 |
| BnaA06g25370D | -0.745564723 | 0.437079503 | 0.348340786  | 0.33345   | -0.691697851 | 0.429103262 | -0.676669642 | 0.42372706  | -0.433076324 | 0.383376924 |
| BnaA06g24140D | -0.233450139 | 0.325702737 | 0.566596618  | 0.427617  | -0.075948853 | 0.253901159 | 0.384758295  | 0.390769752 | 0.292731419  | 0.377923668 |
| BnaA06g13700D | 3.016633112  | 0.79520677  | 0.160822794  | 0.2653999 | 0.727406766  | 0.423716052 | 0.38928973   | 0.33201733  | 0.096945662  | 0.443270281 |
| BnaA06g08590D | -0.784271309 | 0.244328789 | -3.36923381  | 0.2716061 | 1.584962501  | 0.293978301 | 1.600392541  | 0.37196449  | -0.047305715 | 0.223935767 |
| BnaA06g04770D | -1.299560282 | 0.252016626 | -0.607682577 | 0.2423496 | 1.044394119  | 0.257412642 | -1.415037499 | 0.258911902 | 0            | 0.223935767 |
| BnaA06g03040D | 1.66279437   | 0.597077653 | 0.35968541   | 0.2960544 | -0.530874985 | 0.31882067  | 0.698193501  | 0.387201029 | 0.20515349   | 0.280421114 |
| BnaA05g26790D | -0.178748852 | 0.262066734 | 0.888264762  | 0.3892551 | 0.217356831  | 0.261969865 | 0.907151222  | 0.41983911  | 0.162520965  | 0.264963983 |
| BnaA05g22650D | 0.50593802   | 0.417965585 | -3.145886435 | 0.6842923 | -0.006702428 | 0.21572396  | -0.103062536 | 0.267993325 | 0.38056766   | 0.398651326 |
| BnaA05g20870D | 0.566769384  | 0.451671422 | -0.16189167  | 0.286548  | 0.305371029  | 0.353473176 | 0.623783632  | 0.470397865 | 0.74066171   | 0.555448413 |
| BnaA05g11370D | 0.457925701  | 0.415499841 | 0.546195152  | 0.430105  | 0.097135848  | 0.263101465 | -0.16942554  | 0.301120152 | 0.063112265  | 0.258458382 |
| BnaA05g08520D | -0.722852858 | 0.391612949 | 0.357834988  | 0.3160357 | -0.326285962 | 0.304732907 | 0.040050947  | 0.236403184 | -0.424090748 | 0.34810578  |
| BnaA05g08020D | -0.698163323 | 0.440927824 | 2.168218679  | 0.7404959 | 0.26798197   | 0.323276621 | 0.971421255  | 0.558189352 | 0.687989838  | 0.511615414 |
| BnaA05g02840D | -7.285402219 | 0.653261386 | 0.566346823  | 0.340834  | -2.98772167  | 0.526326218 | -4.410933101 | 0.579636919 | -1.815082284 | 0.501926362 |
| BnaA05g01970D | 0            | 0.22451918  | 0            | 0.2263112 | 0            | 0.21244364  | 0            | 0.226982722 | 0            | 0.223935767 |
| BnaA05g01800D | -0.817939673 | 0.419698404 | 0            | 0.2263112 | 0            | 0.237943425 | -0.881799615 | 0.433543996 | -0.717412797 | 0.43051446  |
| BnaA05g01520D | -0.913272348 | 0.489124309 | 1.626022705  | 0.6677256 | 0.458120356  | 0.396009458 | 1.158237119  | 0.609428388 | 1.899245203  | 0.767522192 |
| BnaA04g27730D | -0.912537159 | 0.264435609 | -0.093109404 | 0.2311811 | -4.415037499 | 0.327201997 | 0.539158811  | 0.265380077 | -1           | 0.272303973 |
| BnaA04g23690D | 0.328948523  | 0.364265208 | 1.062829337  | 0.5824659 | -0.199024666 | 0.305739019 | 0.118181426  | 0.281286326 | 0.069830685  | 0.263548381 |
| BnaA04g23630D | -0.111634182 | 0.274668446 | 1.357077699  | 0.6537964 | -0.6321467   | 0.473502061 | 0.080813937  | 0.264312322 | -0.040919773 | 0.247175402 |
| BnaA04g23410D | -4.029747343 | 0.311179066 | 0.555215157  | 0.2523997 | -0.756728849 | 0.242072193 | -1.527247003 | 0.2374159   | -0.756728849 | 0.255675614 |
| BnaA04g20520D | -0.006869829 | 0.225866533 | -0.360124418 | 0.2853174 | 1.129380293  | 0.490528902 | -0.508223057 | 0.32142291  | -0.006869829 | 0.257714067 |
| BnaA04g18340D | 0.643941177  | 0.40202191  | 0.99467836   | 0.4678727 | 1.051138849  | 0.521518018 | -0.343872683 | 0.31281042  | -0.043133109 | 0.238483656 |
| BnaA04g12020D | -0.087413606 | 0.269430942 | 0.981633254  | 0.5893678 | 0.02576542   | 0.229481489 | 0.091319368  | 0.273281465 | 0.253197411  | 0.372380147 |
| BnaA04g05810D | -0.449211357 | 0.389293667 | -2.200207568 | 0.6519867 | 0.742971479  | 0.517467153 | 0.498212982  | 0.422549237 | 0.064874666  | 0.256767586 |
| BnaA04g02670D | 1.443606651  | 0.280317641 | -3.058893689 | 0.2596164 | -0.129294234 | 0.21934332  | -0.943416472 | 0.247538659 | -0.943416472 | 0.245312885 |
| BnaA03g56410D | -2.711494907 | 0.434292332 | -2.126532406 | 0.392509  | -2.448460501 | 0.422544824 | -1.36099766  | 0.377095882 | -1.389566812 | 0.394342879 |
| BnaA03g54260D | 1.116723602  | 0.334401088 | 1.912283854  | 0.4101479 | 0.890588753  | 0.293870425 | 1.292450894  | 0.357229032 | -1.016301812 | 0.286499613 |
| BnaA03g52920D | 0.80454276   | 0.539075434 | -1.670126477 | 0.6381213 | -0.398824485 | 0.389618338 | -0.502164205 | 0.422890468 | 0.501046145  | 0.47428388  |
| BnaA03g39740D | 0            | 0.22451918  | 5.922832139  | 0.4675777 | 0            | 0.21244364  | 0            | 0.226982722 | 0            | 0.223935767 |
| BnaA03g39300D | 0.046645665  | 0.247672954 | -1.303537235 | 0.618195  | -0.022251124 | 0.223979799 | -0.101903374 | 0.27661462  | -0.0725828   | 0.268239899 |
| BnaA03g36190D | -0.944556733 | 0.465446564 | 1.282085677  | 0.5772636 | 0.058032121  | 0.235969478 | 0.869075859  | 0.502817993 | 0.655009998  | 0.475439167 |
| BnaA03g34610D | 0.825117994  | 0.581517049 | -3.42170123  | 0.8205181 | 0.170529272  | 0.312814823 | -0.1714746   | 0.316845873 | -0.095730837 | 0.290449206 |
| BnaA03g32170D | 0.183660027  | 0.275835271 | 0.888299734  | 0.4312102 | 0.04930764   | 0.227471468 | 0.339024089  | 0.316749005 | 0.002386593  | 0.223935767 |
| BnaA03g19810D | -3.680559073 | 0.805846895 | -0.851867689 | 0.195908  | -1.596745327 | 0.695865916 | -2.897430266 | 0.78213623  | -1.25614802  | 0.681172725 |
| BnaA03g19140D | 0.770073906  | 0.302821956 | 1.712281331  | 0.4106982 | 0.927354698  | 0.315630614 | 0.716207034  | 0.3011884   | -0.065887936 | 0.234073937 |
| BnaA03g18190D | -0.143945202 | 0.301747596 | 2.710557853  | 0.8180964 | -0.128379458 | 0.291893427 | 0.308511361  | 0.384365423 | -0.365855491 | 0.44478275  |
| BnaA03g05670D | -4.415037499 | 0.338183363 | 0.409390936  | 0.2492317 | 1.21916852   | 0.310936895 | -0.093109404 | 0.232581281 | -0.04580369  | 0.229285551 |
| BnaA02g32330D | -0.536439158 | 0.442063828 | 0.333042245  | 0.3603222 | -0.06629076  | 0.250002202 | -0.12920256  | 0.288553665 | -0.265439471 | 0.365891529 |
| BnaA02g31000D | -0.936769142 | 0.621030593 | 0.20612775   | 0.3310811 | -0.409693866 | 0.439767604 | -0.241366755 | 0.354750079 | -0.607910691 | 0.564298672 |
| BnaA02g27460D | -1.160464672 | 0.279703406 | -4.662965013 | 0.3491515 | 0.971241007  | 0.293938673 | 0.395928676  | 0.258542041 | 0.395928676  | 0.257069199 |
| BnaA02g20110D | -0.784271309 | 0.247328789 | -3.36923381  | 0.2716061 | 1.584962501  | 0.293978301 | 1.600392541  | 0.37196449  | -0.047305715 | 0.223935767 |
| BnaA02g17180D | -0.781359714 | 0.410134647 | -0.903615464 | 0.4068147 | 0.274645696  | 0.302773521 | -3.348400306 | 0.629187361 | -0.101410521 | 0.261357832 |
| BnaA02g02830D | -0.476206031 | 0.387179013 | -5.663558104 | 0.7709016 | 0.360196249  | 0.361616735 | 0.155024073  | 0.291259379 | 0.423904737  | 0.41288219  |
| BnaA02g00920D | -1.190554369 | 0.617174729 | -0.938095439 | 0.5841303 | -0.755371789 | 0.570609978 | -0.867851361 | 0.592009669 | -0.325939975 | 0.425433266 |
| BnaA02g00310D | -0.220837583 | 0.318107366 | 0.05606737   | 0.2497556 | 0.528448976  | 0.447646976 | 0.039134136  | 0.24213824  | -0.132495172 | 0.293108686 |
| BnaA01g31420D | -0.328758069 | 0.375303815 | 1.669798899  | 0.7188017 | -0.106420594 | 0.273974955 | 0.086183273  | 0.21907693  | -0.02219486  | 0.263090542 |
| BnaA01g30760D | -0.172734535 | 0.255492885 | 1.514011704  | 0.472562  | 0.804947086  | 0.360766934 | 0.424828002  | 0.298211895 | 0.189132305  | 0.261303237 |
| BnaA01g27940D | 2.250672055  | 0.7697964   | -3.4325419   | 0.6689783 | 1.050266056  | 0.583874916 | 0.637579044  | 0.45077759  | 0.591905224  | 0.470281813 |
| BnaA01g26200D | 0.548298366  | 0.436249516 | 0.76231419   | 0.4820903 | -0.107092967 | 0.262667759 | 0.247157049  | 0.372329688 | 1.23869547   | 0.681542587 |
| BnaA01g02570D | -1.041542262 | 0.533360192 | -0.639531443 | 0.4184257 | 0.0818933    | 0.250697894 | 0.671065883  | 0.427218289 | 1.746462982  | 0.760585086 |
| BnaA01g01100D | 0.171302276  | 0.312143348 | 1.219473668  | 0.647643  | 0.077948119  | 0.259598788 | 0.091105706  | 0.273323294 | 0.147008064  | 0.316632322 |
| BnaA01g00310D | 0.242869153  | 0.318734046 | 1.512015481  | 0.6503025 | -0.051106496 | 0.234809257 | -0.443714252 | 0.376686393 | -0.421928175 | 0.395648403 |

# BnaMYB

| GeneID        | log2 (Cold/Control) | Prob.       | log2 (Heat/Control) | Prob.     | log2 (Drought/Control) | Prob.       | log2 (Salt/Control) | Prob.       | log2 (ABA/Control) | Prob.       |
|---------------|---------------------|-------------|---------------------|-----------|------------------------|-------------|---------------------|-------------|--------------------|-------------|
| BnaA01g00670D | -1.594191975        | 0.736786255 | 0.184572523         | 0.3160709 | -0.371226942           | 0.416490985 | -0.809015674        | 0.575942707 | 0.27294327         | 0.395615379 |
| BnaA01g00920D | -0.477425287        | 0.412860175 | 1.466182257         | 0.6693812 | 0.191522897            | 0.30671651  | 0.60852364          | 0.474591831 | 0.663881565        | 0.53778312  |
| BnaA01g02240D | 0.892629902         | 0.475875339 | -1.444237476        | 0.6533761 | -0.358352903           | 0.312244619 | -0.760812336        | 0.398768009 | -0.41241203        | 0.347673553 |
| BnaA01g02690D | -0.437981699        | 0.376943975 | 0.516214612         | 0.4005315 | -0.053716548           | 0.23519453  | 0.0542877           | 0.245773011 | -0.159803807       | 0.298211895 |
| BnaA01g04220D | -0.160464672        | 0.230976346 | -1.247927513        | 0.2518823 | -0.247927513           | 0.224693103 | -1.788495895        | 0.266661383 | -0.855610091       | 0.252483356 |
| BnaA01g05400D | 0                   | 0.22451918  | 0                   | 0.2263112 | 4.807354922            | 0.36131292  | 0                   | 0.226982722 | 0                  | 0.223935767 |
| BnaA01g08890D | -1.553064149        | 0.6019519   | -1.954523242        | 0.6101945 | 0.016468311            | 0.220199725 | -0.339468676        | 0.34712632  | -0.148617052       | 0.293804378 |
| BnaA01g10210D | 0                   | 0.22451918  | 0                   | 0.2263112 | 0                      | 0.21243464  | 0                   | 0.226982722 | 2.874469118        | 0.258500211 |
| BnaA01g1280D  | 0.140177658         | 0.253113002 | 1.784746114         | 0.5378404 | -1.444784843           | 0.387031509 | 0.117740269         | 0.251246081 | 0.987679728        | 0.49587078  |
| BnaA01g14800D | -3.841302254        | 0.299596675 | -0.03947332         | 0.2516556 | -0.06871275            | 0.218207116 | 1.516249519         | 0.223093892 | 3.04541046         | 0.514517066 |
| BnaA01g17750D | -0.585378803        | 0.422028053 | 0.300964415         | 0.3302115 | 0.074624809            | 0.245922717 | 0.076994416         | 0.359497517 | 0.782040676        | 0.5517085   |
| BnaA01g21010D | 1.622115499         | 0.424768396 | -1.027187568        | 0.2433711 | -0.192525296           | 0.248971873 | 0.678071905         | 0.238178872 | 0.33419039         | 0.261549368 |
| BnaA01g21090D | -0.88608668         | 0.433068266 | -1.09024912         | 0.1555342 | -1.04820903            | 0.46802385  | -3.449307401        | 0.639671621 | -0.927354698       | 0.471023108 |
| BnaA01g21650D | -1.294943654        | 0.484939149 | -0.077167861        | 0.2466074 | -0.344171169           | 0.309611557 | -0.209923069        | 0.287877787 | -0.18950477        | 0.284968739 |
| BnaA01g23930D | -3                  | 0.262619324 | -3                  | 0.2596164 | -3                     | 0.24962574  | -3                  | 0.2634656   | -3                 | 0.26244073  |
| BnaA01g30920D | 0.834207079         | 0.561533157 | -1.384861618        | 0.6244958 | 1.000771739            | 0.62676785  | 0.698878137         | 0.527124964 | -0.347243909       | 0.409099915 |
| BnaA01g31080D | 0.643608496         | 0.539657876 | 3.163746427         | 0.4850333 | 2.323165929            | 0.633843654 | 0.910739538         | 0.454143920 | -0.43792139        | 0.28800547  |
| BnaA01g32200D | -1.434440031        | 0.66292404  | -3.378786973        | 0.778814  | 0.605239164            | 0.500123287 | 0.172675612         | 0.310604459 | 0.173591319        | 0.324599757 |
| BnaA01g32800D | 0.202492884         | 0.243029871 | 0.704993024         | 0.269836  | -2.102617818           | 0.288754070 | 0.167727446         | 0.242792103 | -4.60486205        | 0.361596921 |
| BnaA01g33290D | -0.86236387         | 0.440661436 | -1.774910028        | 0.5337477 | -0.525660422           | 0.371347617 | -0.342496397        | 0.238008021 | -0.280941726       | 0.32372794  |
| BnaA01g34510D | 0                   | 0.22451918  | 0                   | 0.2263112 | 0                      | 0.21243464  | 0                   | 0.226982722 | 0                  | 0.223935767 |
| BnaA01g37390D | 0.553153762         | 0.279392987 | -5.156504486        | 0.3919806 | -0.041027268           | 0.216465885 | -1.934112064        | 0.32305241  | -1.013546532       | 0.29657834  |
| BnaA02g00440D | 2.584962501         | 0.25161844  | 0                   | 0.2263112 | 2.502500341            | 0.237869421 | 0                   | 0.226982722 | 3.969626351        | 0.31401247  |
| BnaA02g01290D | 2.874469118         | 0.256930501 | 0                   | 0.2263112 | 2.736965594            | 0.243100321 | 3.736965594         | 0.298240516 | 2.807354922        | 0.258500211 |
| BnaA02g02300D | -5.309855263        | 0.419385589 | -5.309855263        | 0.406068  | -0.987927168           | 0.283450671 | -5.309855263        | 0.4242991   | -1.987927168       | 0.341723467 |
| BnaA02g02580D | -1.626826019        | 0.550774322 | -2.046421801        | 0.5540086 | -0.29918027            | 0.291750326 | -1.159965269        | 0.414839374 | 0.365187511        | 0.36365978  |
| BnaA02g03170D | 1.457045026         | 0.331583096 | -1.611434712        | 0.682641  | 2.279336218            | 0.419876537 | -0.026472211        | 0.226982722 | 1.876851769        | 0.392326253 |
| BnaA02g03510D | 0.785261151         | 0.418022826 | -1.50622583         | 0.4323462 | 1.881558102            | 0.659375163 | 0.640615558         | 0.33709359  | 0.682947056        | 0.419251295 |
| BnaA02g03700D | 0                   | 0.22451918  | 0                   | 0.2263112 | 2.662965013            | 0.239439868 | 2.662965013         | 0.255299701 | 0                  | 0.223935767 |
| BnaA02g06100D | -3.584962501        | 0.287446282 | 0.353636955         | 0.2392762 | -1.08246216            | 0.239685706 | -3.584962501        | 0.291867005 | -3.584962501       | 0.291714448 |
| BnaA02g07180D | -1.736965594        | 0.237046039 | 1.432959407         | 0.248831  | 0                      | 0.21243464  | 0                   | 0.226982722 | 1.963474124        | 0.269741361 |
| BnaA02g09340D | -3                  | 0.22451918  | 0                   | 0.2263112 | 2.22329421             | 0.232525756 | 2.22329421          | 0.248067656 | 0                  | 0.223935767 |
| BnaA02g10750D | -0.647190801        | 0.332507749 | 0.388142272         | 0.2594445 | -0.139789283           | 0.235207211 | -2.090320607        | 0.464526313 | -2.139789283       | 0.4902427   |
| BnaA02g15320D | -2.329747599        | 0.596564691 | -8.268347055        | 0.747389  | -0.520154205           | 0.364192557 | -1.59121471         | 0.544134612 | -3.922572218       | 0.694765138 |
| BnaA02g16430D | 0                   | 0.22451918  | 0                   | 0.2263112 | 3.058893689            | 0.24962574  | 0                   | 0.226982722 | 0                  | 0.223935767 |
| BnaA02g16690D | 0                   | 0.22451918  | 0                   | 0.2263112 | 0                      | 0.21243464  | 0                   | 0.226982722 | 0                  | 0.223935767 |
| BnaA02g17000D | -3.321928095        | 0.275018493 | -3.321928095        | 0.2716061 | -0.152003093           | 0.219805647 | 0.765534746         | 0.257458875 | -0.152003093       | 0.231936225 |
| BnaA02g20260D | 5.247927513         | 0.4002409   | 5.247927513         | 0.4002409 | 0                      | 0.21243464  | 0                   | 0.226982722 | 5.345774837        | 0.436502695 |

|               |              |             |              |           |              |             |              |             |              |               |
|---------------|--------------|-------------|--------------|-----------|--------------|-------------|--------------|-------------|--------------|---------------|
| BnaA02g25380D | -0.566693493 | 0.425281359 | -0.415758667 | 0.3635629 | 0.232553372  | 0.316638927 | 0.980035352  | 0.578172884 | 0.37111645   | 0.400916728   |
| BnaA02g29490D | -1.068064275 | 0.507938814 | 0.401679116  | 0.3513641 | 0.355658952  | 0.351154937 | -0.872807984 | 0.469413769 | -0.237074226 | 0.318450808   |
| BnaA02g30960D | -3.584962501 | 0.287446282 | -3.584962501 | 0.2834218 | 0.473931188  | 0.235135088 | -3.584962501 | 0.291867008 | -3.584962501 | 0.291074448   |
| BnaA02g31210D | 2.189824559  | 0.298751277 | 3.851749041  | 0.4303119 | -0.540568381 | 0.224873631 | 0.700439718  | 0.243811423 | -2.415037499 | 0.247556272   |
| BnaA02g33410D | -0.18473988  | 0.252351263 | 1.945218714  | 0.5206748 | 0.921612101  | 0.364234387 | 0.542734265  | 0.309591743 | 2.186780897  | 0.627756349   |
| BnaA02g36430D | -0.862496476 | 0.240672003 | -0.074000581 | 0.2263112 | -2.736965594 | 0.243100321 | -0.862496476 | 0.243873067 | -2.736965594 | 0.256833633   |
| BnaA03g00640D | -0.468679114 | 0.424396333 | -5.812787444 | 0.8632701 | 0.298972746  | 0.365022544 | -0.072270286 | 0.261065025 | -0.238055754 | 0.360196731   |
| BnaA03g01420D | 0.431735545  | 0.404756244 | 2.249370577  | 0.7675288 | 0.133579346  | 0.278496953 | 0.273076407  | 0.343504526 | 0.176317818  | 0.31998089    |
| BnaA03g02170D | -0.404641984 | 0.22451918  | -3.584962501 | 0.2834218 | 0.502500341  | 0.235216545 | -3.584962501 | 0.291867008 | -0.921997488 | 0.252635264   |
| BnaA03g02860D | -1.46712601  | 0.266606344 | -3.969626351 | 0.3032513 | 0.674229839  | 0.248102258 | -1.46712601  | 0.269972525 | 0.376148486  | 0.248040614   |
| BnaA03g03390D | -1.050626073 | 0.265774155 | -0.243271151 | 0.2390186 | -1.334419039 | 0.261859787 | -1.273018494 | 0.273477403 | -0.334419039 | 0.244663426   |
| BnaA03g04050D | 5.014950341  | 0.388874212 | 2.736965594  | 0.2526947 | 4.64385619   | 0.34721415  | 4.297680549  | 0.336195357 | 3.700439718  | 0.297287242   |
| BnaA03g05370D | -2.494033535 | 0.624887721 | -1.244913875 | 0.4863658 | -0.536186986 | 0.379367889 | -1.146649859 | 0.506864455 | 0.249338186  | 0.324430237   |
| BnaA03g06490D | 2.620661665  | 0.823263412 | -3.188557853 | 0.7527519 | 0.420646612  | 0.413412766 | 0.767322714  | 0.536360914 | 0.831396753  | 0.602053172   |
| BnaA03g06730D | 0            | 0.22451918  | 0            | 0.2263112 | 0            | 0.21244364  | 0            | 0.226982722 | 0            | 0.223935767   |
| BnaA03g09270D | -0.780420523 | 0.521764592 | -1.686036653 | 0.6639654 | 0.362982419  | 0.39222278  | -0.11950372  | 0.258525253 | -0.099880362 | 0.283419634   |
| BnaA03g10180D | 3.415037499  | 0.278780954 | 0            | 0.2263112 | 4.969626351  | 0.374933953 | 2.584962501  | 0.255299148 | 4            | 0.316335112   |
| BnaA03g10580D | -2.079727192 | 0.551203811 | -1.489310262 | 0.4721283 | -1.015596855 | 0.446231375 | -0.102447269 | 0.257350999 | -1.104530583 | 0.491013245   |
| BnaA03g11930D | -2.662965013 | 0.251618144 | -2.662965013 | 0.2496566 | 1.366782331  | 0.254504386 | 1.452512205  | 0.273602892 | -2.662965013 | 0.252892846   |
| BnaA03g12400D | 0            | 0.22451918  | 0            | 0.2263112 | 4.544320516  | 0.37333562  | 0            | 0.226982722 | 0            | 0.223935767   |
| BnaA03g12550D | 1.805905145  | 0.757808922 | 0.684446156  | 0.4896549 | 0.312377417  | 0.36818398  | 0.359358785  | 0.388361249 | 0.375988588  | 0.42847802    |
| BnaA03g12580D | 0            | 0.22451918  | 0            | 0.2263112 | 0            | 0.21244364  | 0            | 0.226982722 | 0            | 0.223935767   |
| BnaA03g12690D | 0            | 0.22451918  | 2.807354922  | 0.2544626 | 3.807354922  | 0.28742867  | 4.36923381   | 0.341758939 | 2.874469118  | 0.258500211   |
| BnaA03g13950D | -5.459431619 | 0.434353975 | -5.459431619 | 0.420013  | -0.386182637 | 0.248591004 | -5.459431619 | 0.439970147 | 1.189225557  | 0.394155747   |
| BnaA03g16870D | -3.93859455  | 0.305333932 | -3.93859455  | 0.3001427 | 0.646363045  | 0.248049421 | 0.705256734  | 0.36555708  | 1.733825887  | 0.358235144   |
| BnaA03g17580D | 1.31724141   | 0.429574395 | -0.031535573 | 0.2285128 | -0.531381461 | 0.272614393 | -1.26459492  | 0.342212212 | -1.361456459 | 0.357810243   |
| BnaA03g21790D | 1.554588852  | 0.302874793 | 2.483815777  | 0.6633516 | 1.50779464   | 0.36923338  | 1.988684687  | 0.289654444 | 2.918863237  | 0.451609778   |
| BnaA03g21820D | -0.763036573 | 0.377857621 | 0.800552277  | 0.4072264 | 0.28289712   | 0.291585209 | -0.247615005 | 0.2878954   | -0.0103618   | 0.225774067   |
| BnaA03g22590D | -1.321928095 | 0.295922276 | 0.969303203  | 0.3048408 | -0.711874613 | 0.257353929 | 0.116644919  | 0.240922981 | -0.212303604 | 0.244093223   |
| BnaA03g24010D | -1.321422684 | 0.556659269 | 1.739793617  | 0.6825135 | -0.235595636 | 0.304644845 | -0.505789833 | 0.390435116 | -0.713898029 | 0.251866005   |
| BnaA03g25820D | 0            | 0.22451918  | 0            | 0.2263112 | 7.930737338  | 0.739414423 | 6.453956489  | 0.554743905 | 6.36923381   | 0.560853235   |
| BnaA03g27440D | -0.95793594  | 0.31083122  | -2.152951923 | 0.350631  | -2.593524514 | 0.372463806 | -5.815916936 | 0.477660182 | -5.815916936 | 0.489890984   |
| BnaA03g29470D | 2.494630181  | 0.611706999 | 1.694654789  | 0.4577015 | 1.123792486  | 0.388640847 | 0.417120814  | 0.282314453 | 0.417120814  | 0.284960742   |
| BnaA03g30340D | 0            | 0.22451918  | 2.502500341  | 0.2479504 | 3.36923338   | 0.262696379 | 3.415037499  | 0.283188471 | 4.345774837  | 0.340140547   |
| BnaA03g30700D | 0.667156128  | 0.369932016 | 0.572828745  | 0.3327059 | 0.007231569  | 0.213982528 | 0.09469441   | 0.248502941 | 0.108209217  | 0.252723326   |
| BnaA03g30840D | 0.110703464  | 0.247399961 | 2.337772373  | 0.6394598 | 0.759796303  | 0.372001479 | 0.217325884  | 0.272455881 | -0.337500899 | 0.289396681   |
| BnaA03g31720D | 0            | 0.22451918  | 0            | 0.2263112 | 3.415037499  | 0.266500669 | 0            | 0.226982722 | 0            | 0.223935767   |
| BnaA03g34140D | 2.192199748  | 0.368822431 | -0.247927513 | 0.2323787 | 2.990477226  | 0.36720869  | 1.395928676  | 0.269910881 | 1.243925583  | 0.264915548   |
| BnaA03g34320D | -0.493525114 | 0.431828789 | 0.465174287  | 0.4171378 | -0.168834117 | 0.301699162 | -0.265218653 | 0.348273099 | -0.051093848 | 0.254865441   |
| BnaA03g37010D | 0.862496476  | 0.251261492 | 2.373458396  | 0.3233713 | -2.874469118 | 0.244608387 | -2.874469118 | 0.260578481 | 0.862496476  | 0.252483356   |
| BnaA03g37280D | 0.017487427  | 0.22451918  | 2.625441157  | 0.4948021 | 0.257157839  | 0.234426186 | -0.03562391  | 0.224426186 | -1           | 0.283201153   |
| BnaA03g39240D | 0.037358251  | 0.235051428 | -0.795670065 | 0.4025195 | 0.044715202  | 0.227555127 | -0.009111788 | 0.22910062  | 0.361055439  | 0.359291891   |
| BnaA03g39790D | -1.48112669  | 0.356991852 | -3.48112669  | 0.4022971 | -0.80556164  | 0.301520836 | -3.403214178 | 0.24229015  | -1.311201688 | 0.351194917   |
| BnaA03g40190D | -4.087462841 | 0.316995579 | -1.584962501 | 0.2652436 | 0.631355406  | 0.247928335 | -1.502500341 | 0.27341159  | -1.86507042  | 0.277804363   |
| BnaA03g40400D | 0            | 0.22451918  | 3.459431619  | 0.2775591 | 0            | 0.21244364  | 2.584962501  | 0.255299148 | 0            | 0.223935767   |
| BnaA03g40600D | 4.247927513  | 0.327631301 | 3.169925001  | 0.2654263 | 0            | 0.21244364  | 0            | 0.226982722 | 0            | 0.223935767   |
| BnaA03g40690D | -2.147259182 | 0.734846684 | 1.805107855  | 0.7319979 | -1.063133818 | 0.680825996 | -3.59781265  | 0.806115485 | -0.508268748 | 0.477097203   |
| BnaA03g41680D | -0.228027956 | 0.306386276 | 1.027162331  | 0.5372437 | 0.161463423  | 0.279474444 | 0.217865605  | 0.308673694 | -0.009522774 | 0.227755469   |
| BnaA03g42350D | 1.052727248  | 0.597139297 | 1.556739775  | 0.6727716 | -0.074269638 | 0.246768114 | 0.118352704  | 0.272989514 | 0.485030809  | 0.454108546   |
| BnaA03g42550D | -0.03255767  | 0.238642168 | -0.418694954 | 0.4006305 | -0.049516091 | 0.241744161 | -0.020533277 | 0.235923245 | -0.244046305 | 0.364533798   |
| BnaA03g43060D | 0.125223762  | 0.291974885 | -1.00600066  | 0.5800222 | -0.152412601 | 0.29814805  | -0.156770812 | 0.308618655 | -0.394910799 | 0.441737997   |
| BnaA03g43540D | 0.143900113  | 0.27377021  | -1.072300475 | 0.4538985 | 0.273525005  | 0.308642872 | 0.425649635  | 0.363162247 | 0.965055407  | 0.56367343    |
| BnaA03g44700D | 1.563429339  | 0.325117123 | 2.321928095  | 0.3834254 | 1.378511623  | 0.300849361 | 0.438884241  | 0.250350048 | 1.707819249  | 0.352293142   |
| BnaA03g52170D | -1.317740298 | 0.33509678  | -1.033947332 | 0.3059614 | -0.159478214 | 0.235650252 | -0.725825037 | 0.29912334  | -0.360175564 | 0.269582849   |
| BnaA03g53110D | 2.68055381   | 0.780515781 | 0.77758797   | 0.4272848 | 0.494471967  | 0.369780108 | 0.787253716  | 0.455863186 | 0.106655936  | 0.264162616   |
| BnaA03g53870D | 5.129283017  | 0.4014128   | 5.014950341  | 0.3782649 | 0            | 0.21244364  | 0            | 0.226982722 | 5.33990737   | 0.433548205   |
| BnaA03g55780D | -1.538948945 | 0.695289108 | 1.067125937  | 0.6151106 | -1.124286805 | 0.639952975 | -0.358884562 | 0.393189895 | -0.490239524 | 0.482696865   |
| BnaA03g58600D | -3.772589504 | 0.296839396 | -3.772589504 | 0.2922413 | -0.965234582 | 0.242503699 | -3.772589504 | 0.301791627 | -0.03562391  | 0.223935767   |
| BnaA04g00800D | -0.966833136 | 0.254942495 | -0.216811389 | 0.2361918 | 0.381090167  | 0.23177331  | -1.033947332 | 0.258636708 | -1.10433666  | 0.260739195   |
| BnaA04g01380D | 0.863678529  | 0.283613371 | 3.947313575  | 0.6358862 | -0.843274496 | 0.248584399 | 0.713118852  | 0.274897407 | 0.259087221  | 0.24471891    |
| BnaA04g10190D | 3.058893689  | 0.262619324 | 0            | 0.2263112 | 0            | 0.21244364  | 2.938599455  | 0.264316725 | 2.938599455  | 0.262328719   |
| BnaA04g13540D | -2.216811389 | 0.370187397 | -0.150140349 | 0.2445027 | -1.644905041 | 0.344409366 | -5.841302254 | 0.480480996 | 0.195787065  | 0.254290834   |
| BnaA04g18810D | -0.565597176 | 0.244172479 | -3.624490865 | 0.2834218 | -3.624490865 | 0.275137377 | -3.624490865 | 0.291867008 | -3.624490865 | 0.291074448   |
| BnaA04g19630D | 0.272272613  | 0.312638698 | 0.793608531  | 0.4430633 | 0.301393378  | 0.316484818 | -0.330060339 | 0.322838511 | 0.027539024  | 0.235368453   |
| BnaA04g21820D | -0.12373568  | 0.245252623 | 2.04858018   | 0.4054272 | 1.395137942  | 0.342135158 | 0.591535155  | 0.271145954 | 1.944601761  | 0.36449857    |
| BnaA04g24320D | 1.907832386  | 0.719466607 | 1.82178108   | 0.6788061 | -0.361652743 | 0.333190232 | 0.599873109  | 0.425162475 | 0.175196818  | 0.298064391   |
| BnaA04g28770D | 4.564784619  | 0.351196766 | 0            | 0.2263112 | 0            | 0.21244364  | 0            | 0.226982722 | 0            | 0.223935767   |
| BnaA04g29720D | 0            | 0.22451918  | 0            | 0.2263112 | 5.156504486  | 0.395014354 | 0            | 0.226982722 | 0            | 0.223935767   |
| BnaA05g00340D | -1.626185163 | 0.496997076 | -0.269823571 | 0.2838666 | -0.626185163 | 0.361610131 | -0.847996907 | 0.401982282 | -0.115100977 | 0.261714484   |
| BnaA05g00510D | -2.662965013 | 0.251618144 | -0.160464672 | 0.23213   | -0.160464672 | 0.219805647 | -0.160464672 | 0.234012293 | 1.337034987  | 0.26916015    |
| BnaA05g00710D | 0            | 0.22451918  | 7.569855608  | 0.6639874 | 4.662965013  | 0.34721415  | 4.841302254  | 0.380193473 | 4.34774837   | 0.340140547   |
| BnaA05g01050D | 1.310256322  | 0.708892529 | -2.979046626 | 0.8166125 | 0.640208308  | 0.523299077 | 0.507591235  | 0.475333756 | 0.427283839  | 0.483237345</ |

|               |               |              |               |            |               |              |               |              |               |              |
|---------------|---------------|--------------|---------------|------------|---------------|--------------|---------------|--------------|---------------|--------------|
| BnaA06g12860D | -2. 00487672  | 0. 654254289 | -0. 643754767 | 0. 4166535 | -0. 157603695 | 0. 282186762 | -0. 218610781 | 0. 311557734 | -0. 290228055 | 0. 352607964 |
| BnaA06g12870D | -1. 553801569 | 0. 372300891 | -1. 26934818  | 0. 3404972 | -0. 166778446 | 0. 240046761 | -1. 932313192 | 0. 394190972 | 0. 188702208  | 0. 260146976 |
| BnaA06g15430D | -0. 176909236 | 0. 298856952 | 0. 294302575  | 0. 3313299 | -0. 410941327 | 0. 377388689 | -0. 15820963  | 0. 293403695 | -0. 340506169 | 0. 376988006 |
| BnaA06g15640D | -4. 584962501 | 0. 352933795 | -4. 584962501 | 0. 3447176 | -1. 921997488 | 0. 284478583 | -4. 584962501 | 0. 358510339 | -4. 584962501 | 0. 361596921 |
| BnaA06g18160D | -2. 061448101 | 0. 624284494 | -2. 047816235 | 0. 5920581 | -3. 650983332 | 0. 703238931 | -1. 977211564 | 0. 62328939  | -1. 187809311 | 0. 571187344 |
| BnaA06g21780D | 4. 029747343  | 0. 311179066 | 0             | 0. 2263112 | 0             | 0. 21244364  | 3. 058893689  | 0. 26634656  | 0             | 0. 223935767 |
| BnaA06g21900D | -0. 76916251  | 0. 357189404 | 0. 655665492  | 0. 356016  | -0. 826419828 | 0. 362338846 | 0. 202492864  | 0. 275689968 | 0. 392631086  | 0. 326539329 |
| BnaA06g24760D | 2. 502500341  | 0. 250160714 | 0             | 0. 2263112 | 0             | 0. 21244364  | 0             | 0. 226982722 | 5. 357552005  | 0. 437530822 |
| BnaA06g24950D | -0. 308586558 | 0. 324910176 | 0. 036099341  | 0. 2369998 | 0. 135951881  | 0. 267984519 | 0. 010924962  | 0. 229701645 | -0. 35614381  | 0. 356894396 |
| BnaA06g28210D | 0             | 0. 22451918  | 0             | 0. 2263112 | 4. 584962501  | 0. 342394942 | 2. 415037499  | 0. 249922946 | 3. 874469118  | 0. 307773257 |
| BnaA06g28660D | 1. 457045026  | 0. 331583096 | 1. 811097324  | 0. 351232  | 0. 19592021   | 0. 299988552 | -0. 652076697 | 0. 257188083 | -1. 459431619 | 0. 277114375 |
| BnaA06g29540D | -1. 185172614 | 0. 625843196 | -3. 820093274 | 0. 7976593 | -0. 036798355 | 0. 234252263 | -2. 230297619 | 0. 749619131 | -0. 177787119 | 0. 327485998 |
| BnaA06g30710D | -3            | 0. 262619324 | -3            | 0. 2596164 | -3            | 0. 249962574 | -3            | 0. 26634656  | -3            | 0. 264244073 |
| BnaA06g31220D | -1. 164854012 | 0. 480379725 | -0. 824816536 | 0. 3974185 | -1. 740356183 | 0. 551181796 | -3. 09085343  | 0. 623247561 | -2. 839891857 | 0. 644397918 |
| BnaA06g31230D | 0. 21987823   | 0. 255605164 | 1. 332464256  | 0. 4106124 | 1. 67286959   | 0. 499341734 | -0. 933572638 | 0. 319265384 | -0. 682611065 | 0. 305289901 |
| BnaA06g31470D | 0. 9274875    | 0. 279580119 | 1. 949626477  | 0. 3580128 | 0. 897430266  | 0. 267478161 | 0. 393663848  | 0. 250224559 | 1. 13492598   | 0. 305100567 |
| BnaA06g31780D | -0. 99034983  | 0. 306344417 | -0. 664579669 | 0. 275679  | 1. 272684576  | 0. 396462979 | -1. 464281018 | 0. 334751136 | 0. 705643983  | 0. 321863222 |
| BnaA06g37380D | -0. 468021955 | 0. 307051147 | -4. 318126525 | 0. 5123639 | 0. 212023091  | 0. 261254359 | -0. 791266979 | 0. 351571031 | 0. 53985447   | 0. 354364807 |
| BnaA06g37640D | 0. 321538651  | 0. 31841863  | 0. 458192114  | 0. 3406711 | -0. 059623983 | 0. 232365529 | -0. 321441438 | 0. 314344446 | 0. 121306296  | 0. 267790782 |
| BnaA06g38670D | -3. 841302254 | 0. 299596675 | -0. 966833136 | 0. 2509621 | 0. 033166864  | 0. 21244364  | -3. 841302254 | 0. 304259572 | -0. 902702799 | 0. 25601025  |
| BnaA07g00280D | 3. 459431619  | 0. 281262109 | 3. 36923381   | 0. 2716061 | 0             | 0. 21244364  | 0             | 0. 226982722 | 2. 502500341  | 0. 251349554 |
| BnaA07g05740D | 0             | 0. 22451918  | 0             | 0. 2263112 | 0             | 0. 21244364  | 3. 874469118  | 0. 307674187 | 0             | 0. 223935767 |
| BnaA07g06740D | 0             | 0. 22451918  | 2. 596367264  | 0. 3349625 | -2. 807354922 | 0. 246608387 | 0. 893084796  | 0. 254513192 | -0. 070389328 | 0. 223935767 |
| BnaA07g10350D | -1. 142550401 | 0. 634235531 | 1. 497672883  | 0. 6967311 | 0. 323736749  | 0. 382705449 | 0. 740824572  | 0. 545735144 | 0. 779949435  | 0. 606867977 |
| BnaA07g11710D | -1. 922946741 | 0. 727528708 | -0. 20805024  | 0. 316738  | -0. 152988112 | 0. 29507908  | 0. 074153369  | 0. 262370548 | -0. 205229031 | 0. 344741801 |
| BnaA07g11930D | -0. 777382842 | 0. 518620769 | 1. 532631037  | 0. 6901485 | -0. 038261558 | 0. 233842774 | -0. 966564989 | 0. 571883306 | 0. 640264651  | 0. 543086671 |
| BnaA07g22130D | -0. 325345455 | 0. 279374228 | 0. 022577848  | 0. 2925991 | -0. 143432103 | 0. 242182271 | 0. 388628496  | 0. 301954542 | 1. 009073584  | 0. 456682166 |
| BnaA07g22240D | -2. 944260355 | 0. 682066557 | -4. 176921112 | 0. 7057641 | -0. 498849207 | 0. 388240163 | -0. 575521721 | 0. 410416447 | -1. 301632513 | 0. 597233964 |
| BnaA07g22980D | -1. 715581204 | 0. 595919634 | -0. 368686193 | 0. 3316668 | -0. 621572644 | 0. 416384867 | -0. 439712145 | 0. 366264222 | 0. 007647777  | 0. 226885854 |
| BnaA07g24010D | 0. 471480253  | 0. 413738596 | 2. 622295009  | 0. 7941742 | 0. 020482848  | 0. 22187511  | -0. 2304      | 0. 320033728 | -0. 721301957 | 0. 512161401 |
| BnaA07g24240D | 3. 584962501  | 0. 287446822 | 0             | 0. 2263112 | 0             | 0. 21244364  | 0             | 0. 226982722 | 0             | 0. 223935767 |
| BnaA07g25720D | -1. 619498    | 0. 2533321   | -1. 127351318 | 0. 4409763 | 0. 333163812  | 0. 319333633 | 0. 52616988   | 0. 38246548  | 0. 772900081  | 0. 48502501  |
| BnaA07g25800D | 0. 267695783  | 0. 266005319 | -6. 101538026 | 0. 4875367 | 1. 127286094  | 0. 407798795 | 0. 551904212  | 0. 310045264 | 0. 833135726  | 0. 369370619 |
| BnaA07g26980D | 2. 807354922  | 0. 256930501 | 4. 222392421  | 0. 3190364 | 2. 736965964  | 0. 243100321 | 3. 700439718  | 0. 298240516 | 4. 662965013  | 0. 366724347 |
| BnaA07g28100D | -0. 871013559 | 0. 363948184 | -5. 533978572 | 0. 4262653 | -2. 074546953 | 0. 337688013 | -2. 949016071 | 0. 368294058 | -5. 533978572 | 0. 455887404 |
| BnaA07g29070D | 0. 25169699   | 0. 264162607 | 1. 735014688  | 0. 7196856 | -0. 422483684 | 0. 400896914 | -0. 517626778 | 0. 432980024 | -1. 064552388 | 0. 627289619 |
| BnaA07g30860D | 4. 029747343  | 0. 311179066 | 3. 969626351  | 0. 3032513 | 4. 087462841  | 0. 305193033 | 4. 087462841  | 0. 321877997 | 4. 029747343  | 0. 316335112 |
| BnaA07g31540D | -0. 707266598 | 0. 374280091 | -1. 883976204 | 0. 4806263 | 0. 237541616  | 0. 281510884 | -0. 58852032  | 0. 355452376 | 0. 436202109  | 0. 359441597 |
| BnaA07g31550D | -0. 982297998 | 0. 31107719  | -3. 017921908 | 0. 3658283 | -2. 947552987 | 0. 374601518 | -0. 44503224  | 0. 27320441  | -2. 054447784 | 0. 374338603 |
| BnaA07g31680D | 0. 798838855  | 0. 423581757 | -3. 106499621 | 0. 5192064 | 0. 740239967  | 0. 411026278 | -0. 080556354 | 0. 247945947 | 1. 625804955  | 0. 651966871 |
| BnaA07g31770D | -2. 404773636 | 0. 78102434  | -3. 354454683 | 0. 8058843 | -0. 56253981  | 0. 483853781 | -0. 720869286 | 0. 529487654 | -0. 827997717 | 0. 608631424 |
| BnaA07g32000D | 0. 44220577   | 0. 40868294  | -1. 801158656 | 0. 6219024 | 0. 497010859  | 0. 427839568 | 0. 101879614  | 0. 270588962 | -0. 89426806  | 0. 552165892 |
| BnaA07g34700D | 0. 988318195  | 0. 293882705 | -4. 36923381  | 0. 3291019 | 0. 349584438  | 0. 23778964  | -0. 632268215 | 0. 257128641 | 0. 916126849  | 0. 292542388 |
| BnaA07g36940D | 0             | 0. 22451918  | 0             | 0. 2263112 | 5. 523561956  | 0. 432966994 | 0             | 0. 226982722 | 4. 662965013  | 0. 366724347 |
| BnaA07g36950D | -1. 415037499 | 0. 512049121 | -5. 667424661 | 0. 6829604 | -0. 215728691 | 0. 282272623 | -0. 194554668 | 0. 286074712 | -1. 223506042 | 0. 525641534 |
| BnaA07g38030D | 1. 500428991  | 0. 313911198 | 1. 822357085  | 0. 3287673 | -0. 965234582 | 0. 242503699 | 0. 549338591  | 0. 253802089 | 0. 946228744  | 0. 277532671 |
| BnaA07g38930D | 0. 2694192    | 0. 356539945 | -0. 012586004 | 0. 2314761 | -0. 305952857 | 0. 371655835 | -0. 042204477 | 0. 245066311 | -0. 336600037 | 0. 413097943 |
| BnaA08g09740D | 0             | 0. 22451918  | 2. 471305719  | 0. 3652933 | 0. 447458977  | 0. 231883388 | 0. 862496476  | 0. 263957871 | 2. 932885504  | 0. 457686076 |
| BnaA08g11190D | 0. 283540061  | 0. 311027158 | 0. 48416186   | 0. 3516019 | 0. 045305741  | 0. 229316373 | -0. 645516687 | 0. 386335817 | -0. 044947406 | 0. 239370883 |
| BnaA08g12050D | -0. 747557005 | 0. 33296495  | 0. 710493383  | 0. 3454903 | -0. 306185358 | 0. 26698281  | -0. 34586906  | 0. 286171581 | 0. 057626818  | 0. 23802353  |
| BnaA08g15280D | -5. 672425342 | 0. 457087252 | -5. 672425342 | 0. 4409592 | -5. 672425342 | 0. 449846331 | -5. 672425342 | 0. 469249879 | -5. 672425342 | 0. 472936261 |
| BnaA08g15610D | 0. 916904384  | 0. 335565712 | 1. 673431289  | 0. 5007771 | 0. 959520931  | 0. 392167741 | 0. 236174946  | 0. 266074829 | 1. 176877762  | 0. 468491317 |
| BnaA08g16990D | -0. 345759801 | 0. 35630658  | -2. 230353137 | 0. 6527947 | 0. 551622193  | 0. 445434411 | 0. 069736206  | 0. 256602469 | 1. 055222744  | 0. 645580154 |
| BnaA08g19860D | -0. 84434913  | 0. 269728152 | -2. 303780748 | 0. 2958871 | -0. 84434913  | 0. 258007063 | -2. 303780748 | 0. 309182254 | -4. 718818247 | 0. 37162061  |
| BnaA08g21210D | 0. 242964031  | 0. 289029201 | 0. 749127479  | 0. 3943517 | -0. 028263852 | 0. 220510145 | -0. 446765207 | 0. 324738455 | 0. 017702002  | 0. 228713146 |
| BnaA08g22290D | -0. 933661107 | 0. 62286449  | 0. 015208723  | 0. 2368193 | 0. 203736662  | 0. 335114393 | 0. 434869437  | 0. 444353447 | 0. 313634689  | 0. 42381292  |
| BnaA08g22300D | 0             | 0. 22451918  | 4. 029747343  | 0. 3056399 | 0             | 0. 21244364  | 0             | 0. 226982722 | 0             | 0. 223935767 |
| BnaA08g22480D | -0. 766014127 | 0. 438864965 | -3. 533179959 | 0. 6551173 | 0. 597687567  | 0. 433057258 | 0. 729989841  | 0. 470516749 | -0. 027826427 | 0. 236746627 |
| BnaA08g22580D | 0. 497177017  | 0. 351947497 | -0. 902702799 | 0. 3744188 | 0. 106915204  | 0. 243023751 | -0. 290654118 | 0. 295327856 | 1. 352065147  | 0. 601954102 |
| BnaA08g22850D | 0             | 0. 22451918  | 0             | 0. 2263112 | 0             | 0. 21244364  | 0             | 0. 226982722 | 0             | 0. 223935767 |
| BnaA08g23070D | 0. 091788341  | 0. 263883018 | 0. 677694582  | 0. 4709571 | -0. 50084129  | 0. 417538483 | -0. 139315576 | 0. 288668146 | -0. 278082842 | 0. 359514248 |
| BnaA08g26320D | -2. 502500341 | 0. 250160714 | -2. 502500341 | 0. 2479504 | 1. 404390255  | 0. 250803568 | -2. 502500341 | 0. 253714027 | -2. 502500341 | 0. 251349554 |
| BnaA08g26750D | -0. 459168157 | 0. 426459192 | 0. 713651747  | 0. 5072651 | -0. 026745481 | 0. 229105023 | 0. 305270362  | 0. 372560673 | -0. 07034416  | 0. 268504886 |
| BnaA08g29620D | 0. 900464326  | 0. 325242612 | 1. 674309986  | 0. 4132432 | 0. 568842385  | 0. 273772412 | -2. 206450877 | 0. 338819613 | 0. 485426827  | 0. 29909136  |
| BnaA08g29670D | -2. 941897045 | 0. 455548364 | -2. 517399217 | 0. 4177344 | -1. 746881063 | 0. 406816901 | 0. 253118937  | 0. 275247455 | -0. 441631709 | 0. 300611281 |
| BnaA08g30200D | -1. 247408054 | 0. 623805787 | 0. 427453196  | 0. 3986315 | -0. 1727946   | 0. 275718588 | 0. 291432401  | 0. 358239547 | -0. 168211494 | 0. 31865175  |
| BnaA08g00080D | -0. 247521406 | 0. 316117158 | -0. 765720433 | 0. 4352522 | 0. 983661263  | 0. 571202755 | 0. 768916618  | 0. 4988684   | 0. 018449037  | 0. 23310305  |
| BnaA09g02150D | 0             | 0. 22451918  | 0             | 0. 2263112 | 0             | 0. 21244364  | 0             | 0. 226982722 | 0             | 0. 223935767 |
| BnaA09g02730D | 0             | 0. 22451918  | 0             | 0. 2263112 | 0             | 0. 21244364  | 2. 938599455  | 0. 264316725 | 0             | 0.           |

|               |              |             |              |           |              |             |              |              |              |             |
|---------------|--------------|-------------|--------------|-----------|--------------|-------------|--------------|--------------|--------------|-------------|
| BnaA10g17890D | -0.369885463 | 0.347947268 | -2.646725668 | 0.6354772 | 0.771775686  | 0.499051129 | 0.297539198  | 0.336323048  | 0.098701505  | 0.270307161 |
| BnaA10g18810D | -0.960829403 | 0.531083782 | -1.80934165  | 0.6270607 | -0.710734053 | 0.477667406 | -0.547080599 | 0.42581701   | 0.24160866   | 0.345221741 |
| BnaA10g19100D | -1.569855608 | 0.302874793 | -4.984893108 | 0.3767987 | -1.662961038 | 0.297392916 | -4.984893108 | 0.3767987    | -4.984893108 | 0.3767987   |
| BnaA10g20990D | -0.17611146  | 0.288377541 | -0.496047943 | 0.3597608 | -0.125210243 | 0.263103667 | -0.246899063 | 0.310549421  | -0.069860319 | 0.255211085 |
| BnaA10g21970D | 3.459431619  | 0.281262109 | 3.415037499  | 0.2749172 | 3.459431619  | 0.268900366 | 4.624490865  | 0.36175103   | 3.459431619  | 0.284370707 |
| BnaA10g22930D | -1.79930265  | 0.666398077 | 0.48294672   | 0.4040418 | 0.392093411  | 0.378938585 | -0.022302394 | 0.234338124  | -0.345749915 | 0.388957871 |
| BnaA10g23980D | 4.160991877  | 0.506294251 | 0.784271309  | 0.2424156 | 2.096861539  | 0.292179629 | 1.502500341  | 0.27374159   | 2.353636955  | 0.32804079  |
| BnaA10g24770D | -0.500867409 | 0.398307883 | -2.468857014 | 0.6545119 | -0.306489364 | 0.336833809 | -0.402565335 | 0.36898556   | 0.015438731  | 0.232605499 |
| BnaA10g25530D | 0.95247163   | 0.325742365 | 2.760812336  | 0.5519876 | -0.013420516 | 0.21244364  | 0.993305347  | 0.333335535  | -1           | 0.29657834  |
| BnaA10g26900D | -0.070289698 | 0.25906381  | -1.922417059 | 0.7033314 | 0.249784148  | 0.345831572 | 0.310037056  | 0.373830973  | -0.04804604  | 0.255790095 |
| BnaA10g27190D | -1.744161096 | 0.287893198 | 1.010726407  | 0.2933509 | 1.46529227   | 0.340565448 | 0.840801405  | 0.288674751  | 0.634350528  | 0.271533428 |
| BnaA10g28420D | 2.473120124  | 0.791470728 | 0.710218683  | 0.4524706 | 0.198319645  | 0.295876044 | 0.179233804  | 0.296783085  | 0.438332988  | 0.414590598 |
| BnaA10g29180D | 0.057333175  | 0.232576878 | -0.247521406 | 0.2565562 | -1.351472371 | 0.352555127 | -1.750021747 | 0.384479904  | -1           | 0.347936261 |
| BnaA10g30020D | 0            | 0.22451918  | 4.196397213  | 0.316126  | 0            | 0.21244364  | 3.700439718  | 0.298240516  | 0            | 0.223935767 |
| BnaAnng01040D | 0.707311525  | 0.460065959 | 2.483649014  | 0.7598961 | -0.532450664 | 0.382474286 | 0.014847764  | 0.230141956  | 0.4439724    | 0.401561784 |
| BnaAnng02150D | 2.502500341  | 0.250160714 | 0            | 0.2263112 | 4.604862058  | 0.342394942 | 0            | 0.226982722  | 2.415037499  | 0.247556272 |
| BnaAnng03830D | -1.720732567 | 0.672604266 | 1.228791482  | 0.6269814 | -0.269579107 | 0.337936789 | -4.326015052 | 0.807396791  | -0.556423357 | 0.478787999 |
| BnaAnng05010D | 0            | 0.22451918  | 0            | 0.2263112 | 0            | 0.21244364  | 0            | 0.226982722  | 0            | 0.223935767 |
| BnaAnng06040D | -0.032061209 | 0.2266679   | 2.469485283  | 0.4876471 | 2.077167861  | 0.461882243 | 1.286621226  | 0.359212635  | -1.922832139 | 0.315417063 |
| BnaAnng06630D | -2.362258533 | 0.564292067 | -2.887127341 | 0.5565228 | 0.098075657  | 0.245577072 | 0.060405239  | 0.243833439  | -0.326911502 | 0.322873736 |
| BnaAnng06640D | -1.776288724 | 0.536215612 | -4.361251225 | 0.623023  | -0.699285654 | 0.391993818 | -0.436751229 | 0.339312762  | -0.333054333 | 0.327728169 |
| BnaAnng13080D | 0.348840757  | 0.328793723 | 1.31751618   | 0.5572625 | 0.25966541   | 0.29714414  | 0.512185061  | 0.377003417  | 0.106128351  | 0.264162616 |
| BnaAnng13560D | 0            | 0.22451918  | 2.415037499  | 0.244965  | 0            | 0.21244364  | 0            | 0.226982722  | 0            | 0.223935767 |
| BnaAnng13960D | -0.507566775 | 0.343165487 | -1.513943037 | 0.4596058 | 0.350756748  | 0.316004879 | -0.163322267 | 0.27499912   | 0.226169112  | 0.298321973 |
| BnaAnng15540D | -0.657731457 | 0.508848057 | 0.136895321  | 0.2931241 | 0.075337726  | 0.260565272 | 0.014144182  | 0.232303885  | -0.281123544 | 0.388706894 |
| BnaAnng17460D | 0.932885804  | 0.254942495 | -2.874469118 | 0.2544626 | -2.874469118 | 0.246608387 | -2.874469118 | 0.26078481   | -2.874469118 | 0.258500211 |
| BnaAnng17890D | 0.582227533  | 0.431826588 | -5.874469118 | 0.2591805 | 0.73470962   | 0.488248089 | 0.560853882  | 0.426197207  | 0.71736486   | 0.516775864 |
| BnaAnng21440D | 0.487706567  | 0.309809697 | 1.621754532  | 0.4995399 | 0.441412915  | 0.292961182 | 0.536236461  | 0.322521487  | 0.836714196  | 0.395950016 |
| BnaAnng26800D | -0.078002512 | 0.22451918  | -2.662965013 | 0.2496566 | 0.796466606  | 0.235542376 | 2.055853235  | 0.305875515  | -0.160464672 | 0.231936225 |
| BnaAnng27960D | 0            | 0.22451918  | 0            | 0.2263112 | 0            | 0.21244364  | 3.459431619  | 0.285733471  | 0            | 0.223935767 |
| BnaAnng30810D | -2.807354922 | 0.256930501 | -2.807354922 | 0.2544626 | -2.807354922 | 0.246608387 | 0.893084796  | 0.254513192  | -2.807354922 | 0.258500211 |
| BnaAnng32120D | 0            | 0.22451918  | 0            | 0.2263112 | 0            | 0.21244364  | 0            | 0.226982722  | 0            | 0.223935767 |
| BnaAnng32620D | -1.60E-16    | 0.22451918  | -1.463885759 | 0.4787286 | 0.580805731  | 0.39978733  | 0.40656284   | 0.347916447  | 0.827292773  | 0.503980415 |
| BnaAnng34960D | 0.652995708  | 0.37164923  | 0.717964632  | 0.3667948 | 0.206900245  | 0.26377294  | -0.327839057 | 0.292954571  | -0.323614472 | 0.29772315  |
| BnaAnng35540D | 1.456413427  | 0.604571753 | 0.837827274  | 0.431558  | -0.157541277 | 0.260858079 | -0.616395009 | 0.369551147  | -0.078808841 | 0.251516873 |
| BnaAnng35730D | 0            | 0.22451918  | 0            | 0.2263112 | 0            | 0.21244364  | 0            | 0.226982722  | 0            | 0.223935767 |
| BnaAnng36570D | -2.045214714 | 0.742488288 | -3.278641186 | 0.7853548 | 0.214872407  | 0.326695639 | 0.37107356   | 0.399214925  | -0.46457696  | 0.466820335 |
| BnaAnng39140D | 0.511448576  | 0.416701892 | -1.115477217 | 0.5128989 | 0.512056667  | 0.420684508 | -0.028014376 | 0.236328331  | 0.038496964  | 0.243578058 |
| BnaAnng41910D | -1.74723393  | 0.406623164 | -6.554588852 | 0.3593594 | 0.705938699  | 0.349171334 | -6.554588852 | 0.366821656  | 0.797086587  | 0.390756543 |
| BnaC01g00270D | 1.554075455  | 0.608085438 | 0.663218941  | 0.3779765 | -0.835984389 | 0.391892546 | 0.174742018  | 0.276251365  | -0.235316987 | 0.291941861 |
| BnaC01g01250D | 3.662965013  | 0.290878509 | 0            | 0.2263112 | 0            | 0.21244364  | 0            | 0.226982722  | 0            | 0.223935767 |
| BnaC01g01660D | -1.501176873 | 0.726185759 | 0.179001803  | 0.3162779 | -0.635042804 | 0.533575945 | -0.587425655 | 0.502855419  | 0.433122509  | 0.48281905  |
| BnaC01g01940D | -0.695070909 | 0.453010596 | 1.490391928  | 0.6541244 | 0.357780974  | 0.36684103  | 1.100109299  | 0.672334335  | 0.955508081  | 0.609683768 |
| BnaC01g02200D | -5.68182404  | 0.457087252 | -5.68182404  | 0.440952  | -0.289506617 | 0.244749287 | -5.68182404  | 0.462498679  | -5.68182404  | 0.472936261 |
| BnaC01g03510D | 2.548327499  | 0.768387404 | 0.426391997  | 0.3363847 | 0.352605693  | 0.325266829 | 0.356884574  | 0.39337355   | 0.809177658  | 0.495988761 |
| BnaC01g03950D | -0.728279866 | 0.441520043 | 0.758136294  | 0.4627078 | -0.130099991 | 0.266192451 | 0.05638247   | 0.248282786  | -0.170709288 | 0.297485382 |
| BnaC01g06660D | 0.026472211  | 0.22451918  | 0.637429921  | 0.2578816 | 1.013296823  | 0.280134911 | 0.704544116  | 0.269479376  | 0.584962501  | 0.261701275 |
| BnaC01g12000D | 0            | 0.22451918  | 0            | 0.2263112 | 0            | 0.21244364  | 0            | 0.226982722  | 0            | 0.223935767 |
| BnaC01g14080D | 0            | 0.22451918  | 2.807354922  | 0.2544626 | 2.807354922  | 0.246608387 | 0            | 0.226982722  | 0            | 0.223935767 |
| BnaC01g20650D | 0            | 0.22451918  | 0            | 0.2263112 | 0            | 0.21244364  | 0            | 0.226982722  | 2.736965594  | 0.256833633 |
| BnaC01g21010D | -0.137453163 | 0.299737574 | 0.234666686  | 0.3346499 | 0.073790726  | 0.256186375 | 0.201765234  | 0.33082576   | -0.141150961 | 0.314395541 |
| BnaC01g22100D | -0.023348746 | 0.231738085 | 0.248517227  | 0.3160093 | -0.034018488 | 0.226648086 | 0.104458279  | 0.270025362  | -0.447907181 | 0.36416454  |
| BnaC01g26310D | -2.415037499 | 0.246506129 | -2.415037499 | 0.244965  | 2.820178962  | 0.33426239  | -2.415037499 | 0.249922946  | -0.299560282 | 0.232237839 |
| BnaC01g26440D | -2.736965594 | 0.255312357 | 1.321928095  | 0.261371  | -2.736965594 | 0.243100321 | -2.736965594 | 0.258914104  | 0.807354922  | 0.248853576 |
| BnaC01g27820D | -1.051024003 | 0.35042402  | 0.043887644  | 0.2318658 | 0.771094272  | 0.355117739 | 0.197510833  | 0.264539082  | 0.277812461  | 0.277255275 |
| BnaC01g31020D | 0            | 0.22451918  | 0            | 0.2263112 | 0            | 0.21244364  | 2.874469118  | 0.260578481  | 0            | 0.223935767 |
| BnaC01g37570D | 0            | 0.22451918  | 0            | 0.2263112 | 0            | 0.21244364  | 0            | 0.226982722  | 0            | 0.223935767 |
| BnaC01g38230D | 0            | 0.22451918  | 0            | 0.2263112 | 0            | 0.21244364  | 0            | 0.226982722  | 0            | 0.223935767 |
| BnaC01g41180D | -0.085081501 | 0.237341048 | 2.395038634  | 0.6025749 | 0.127647823  | 0.236363556 | 0.624662625  | 0.326176072  | 1.578592976  | 0.534846243 |
| BnaC02g00040D | -2.662965013 | 0.251618144 | -2.662965013 | 0.2496566 | -0.160464672 | 0.219805647 | 0.796466606  | 0.250946669  | -0.160464672 | 0.231936225 |
| BnaC02g01920D | -1.137545041 | 0.641331149 | 0.866673202  | 0.5637989 | -0.516947971 | 0.467852866 | -0.030417816 | 0.240727042  | -0.531576082 | 0.506604671 |
| BnaC02g02590D | 0.547487795  | 0.414934041 | 2.80359087   | 0.7893374 | -1.693022247 | 0.596820071 | 0.211400093  | 0.303856687  | -0.001144542 | 0.223935767 |
| BnaC02g03720D | -0.723290657 | 0.33627021  | -0.49120918  | 0.2955062 | -0.004127886 | 0.21244364  | 0.678071905  | 0.365401212  | 0.185413509  | 0.268737451 |
| BnaC02g04390D | -3.736965594 | 0.23936847  | 0.485426827  | 0.2447581 | -3.736965594 | 0.28129293  | -3.736965594 | 0.298240516  | -0.036525876 | 0.223935767 |
| BnaC02g05740D | 1.38827059   | 0.292967787 | -3.502500341 | 0.2775591 | -3.502500341 | 0.268900366 | -3.502500341 | 0.285733471  | 1.338801913  | 0.295627968 |
| BnaC02g05990D | -1.06939625  | 0.508784212 | -2.346324749 | 0.6119998 | -0.501126476 | 0.382163866 | -0.627931261 | 0.415858695  | -0.487187285 | 0.404890801 |
| BnaC02g06730D | -0.034646143 | 0.4901018   | -3.117108303 | 0.4369056 | -0.59724083  | 0.303169802 | -0.712718048 | 0.326429251  | -0.483471956 | 0.30563112  |
| BnaC02g07210D | 1.442564333  | 0.687257829 | -2.172370248 | 0.6662198 | -0.507088583 | 0.419971204 | 0.664186084  | 0.486594995  | 0.317278578  | 0.384642819 |
| BnaC02g07480D | 0.074000581  | 0.22451918  | -2.662965013 | 0.2496566 | 1.839535328  | 0.277312515 | -2.662965013 | 0.255299148  | -2.662965013 | 0.252892846 |
| BnaC02g10950D | -2           | 0.24163285  | -2           | 0.2407733 | -2           | 0.229679629 | -2           | 0.245020078  | -2           | 0.242580753 |
| BnaC02g10960D | 0            | 0.22451918  | 2            | 0.2407733 | 0            | 0.21244364  | 2.502500341  | 0.253714027  | 0            | 0.223935767 |
| BnaC02g16640D | -2.119446556 | 0.773831854 | 1.39479932   | 0.6865912 | -0.155195347 | 0.306034027 | -1.218908414 | 0.670250801  | 0.546561201  | 0.530687502 |
| BnaC02g22160D | 0            | 0.22451918  | 0            | 0.2263112 | 0            | 0.21244364  | 3.169925001  | 0.272455881  | 0            | 0.223935767 |
| BnaC02g22630D | 0.078002512  | 0.22451918  | -2.584962501 | 0.2496566 | 0.91753784   | 0.235687678 | 0.226982722  | -2.584962501 | 0.252892846  | 0.223935767 |
| BnaC02g22880D | -3.058893689 | 0.262619324 | -3.058893689 | 0.25961   |              |             |              |              |              |             |

|               |              |             |              |           |              |             |              |              |              |             |
|---------------|--------------|-------------|--------------|-----------|--------------|-------------|--------------|--------------|--------------|-------------|
| BnaC03g15450D | 4.95419631   | 0.384678044 | 0            | 0.2263112 | 3.321928095  | 0.262696379 | 0            | 0.226982722  | 0            | 0.223935767 |
| BnaC03g15570D | -3.115477217 | 0.266122001 | -3.115477217 | 0.2627866 | -3.115477217 | 0.253588538 | 0.791413378  | 0.254244602  | -3.115477217 | 0.268165046 |
| BnaC03g16910D | 0            | 0.22451918  | 0            | 0.2263112 | 0            | 0.21244364  | 0            | 0.226982722  | 0            | 0.223935767 |
| BnaC03g17390D | 0            | 0.22451918  | 0            | 0.2263112 | 4.502500341  | 0.335766054 | 0            | 0.226982722  | 0            | 0.223935767 |
| BnaC03g20340D | -0.370938404 | 0.278193138 | -1.247927513 | 0.3451293 | -1.167007518 | 0.351751559 | -0.173580172 | 0.256760981  | 0.285252445  | 0.277779245 |
| BnaC03g21050D | -1.402964687 | 0.408435045 | -1.779340546 | 0.4108259 | -0.053515509 | 0.223662774 | -1.413691074 | 0.411768202  | -2.724892762 | 0.50435468  |
| BnaC03g26060D | -0.135776719 | 0.243881873 | -1.254421276 | 0.3162008 | 1.096075972  | 0.37987865  | 0.163190167  | 0.257679295  | 1.21620855   | 0.426474603 |
| BnaC03g26090D | -1.767553914 | 0.40863185  | 0.688751604  | 0.3342118 | -0.628489876 | 0.306443517 | -1.404983835 | 0.388293001  | 0.13014751   | 0.252943482 |
| BnaC03g26620D | -2.313890776 | 0.377272007 | 0.50486891   | 0.2835253 | -0.284143432 | 0.249035718 | -0.506535854 | 0.283346983  | -0.689399911 | 0.302978266 |
| BnaC03g28550D | -1.088536675 | 0.414755715 | 2.582575118  | 0.7167873 | 0.200139614  | 0.266269506 | -0.696509153 | 0.360584205  | -0.853158612 | 0.401863398 |
| BnaC03g32460D | -1.818553129 | 0.368842245 | -2.108059746 | 0.3622046 | -0.045323991 | 0.21990912  | -1.224873411 | 0.34400428   | -1.260062839 | 0.356458487 |
| BnaC03g35980D | 0            | 0.22451918  | 0            | 0.2263112 | 2            | 0.229679629 | 0            | 0.226982722  | 0            | 0.223935767 |
| BnaC03g36160D | -0.224754011 | 0.296071982 | 1.831224874  | 0.374563  | 0.460332298  | 0.37480186  | 0.434374508  | 0.366224594  | -0.167979596 | 0.288877294 |
| BnaC03g39750D | -0.218525065 | 0.36653634  | 0.249659883  | 0.3315545 | 0.014688838  | 0.218106045 | -0.141901525 | 0.29503725   | 0.011687911  | 0.230007661 |
| BnaC03g43590D | 2.294183104  | 0.323551816 | 3.526545814  | 0.4256248 | -2.807354922 | 0.244608387 | 0            | 0.226982722  | 0            | 0.223935767 |
| BnaC03g48630D | -0.081638469 | 0.258037884 | -0.334825089 | 0.3401207 | -0.419713986 | 0.384715471 | 0.386238218  | 0.38365432   | -0.014075185 | 0.229408838 |
| BnaC03g51750D | 0            | 0.22451918  | 0            | 0.2263112 | 0            | 0.21244364  | 0            | 0.226982722  | 0            | 0.223935767 |
| BnaC03g55550D | -1.124212027 | 0.418201152 | -2.298890559 | 0.4773834 | 0.190102883  | 0.263185125 | -0.068358793 | 0.244198897  | -0.281145009 | 0.294460442 |
| BnaC03g55560D | -0.895289944 | 0.580240146 | -2.070135801 | 0.733059  | 0.735189657  | 0.5608026   | 0.462271646  | 0.442512945  | -0.39073361  | 0.44367977  |
| BnaC03g60080D | -0.290372281 | 0.342652524 | -2.582567986 | 0.695954  | 0.391175779  | 0.389809874 | -0.054954826 | 0.247697171  | 0.479337145  | 0.457518757 |
| BnaC03g61550D | -4.231325546 | 0.5540152   | 0.564784619  | 0.3354138 | 0.495410916  | 0.332052027 | -2.896906507 | 0.515239177  | -0.247092862 | 0.283683821 |
| BnaC03g64160D | 0.090197809  | 0.235231956 | 1.072603749  | 0.3538607 | -0.2208497   | 0.239166138 | 1.441552018  | 0.433143119  | 1.566225938  | 0.478400525 |
| BnaC03g66110D | 0.421858765  | 0.338049068 | 0.21553875   | 0.2777616 | -0.136136688 | 0.253531297 | -0.108844996 | 0.257760488  | -0.082060015 | 0.251516873 |
| BnaC03g66940D | -0.170573841 | 0.283503294 | 0.261519992  | 0.3041121 | -0.581722672 | 0.393521699 | -0.347451603 | 0.334271197  | -0.228676796 | 0.311909983 |
| BnaC03g68390D | -2.14004796  | 0.48665196  | 0.793671338  | 0.3681003 | -1.588143748 | 0.452457378 | -0.592928811 | 0.37465566   | -0.837863801 | 0.390142309 |
| BnaC03g71630D | 0.932885804  | 0.240672003 | 0.710493383  | 0.2364582 | 1.347923303  | 0.239837613 | 0            | 0.226982722  | 0            | 0.223935767 |
| BnaC03g71860D | 2.736965594  | 0.255312357 | 0            | 0.2263112 | 2.662965013  | 0.239348868 | 2.662965013  | 0.255299148  | 0            | 0.223935767 |
| BnaC03g74080D | -2.041820176 | 0.295294833 | -4.544320516 | 0.3401207 | -0.106915204 | 0.223292913 | -1.544320516 | 0.287252545  | -0.175086707 | 0.240649988 |
| BnaC03g76670D | -1.628670361 | 0.610262778 | -5.551955395 | 0.7696137 | -0.857871172 | 0.491352284 | -2.368355456 | 0.675867561  | -2.015902495 | 0.684935989 |
| BnaC04g00590D | 1.571809167  | 0.745660731 | -2.724399155 | 0.7939629 | 0.51499568   | 0.49746536  | 0.556959909  | 0.491781588  | 0.549147541  | 0.534066892 |
| BnaC04g01230D | -2.149747412 | 0.425208708 | -2.219009782 | 0.404393  | -6.564784619 | 0.561685424 | -2.149747412 | 0.429140688  | -2.149747412 | 0.447957395 |
| BnaC04g03690D | 1.439479614  | 0.600483462 | 0.22446675   | 0.2811476 | -0.027241329 | 0.220510145 | 0.184839675  | 0.489193211  | 0.423316977  | 0.362929613 |
| BnaC04g05500D | -0.394824278 | 0.325744567 | 0.297292362  | 0.3021241 | 0.33408998   | 0.317319208 | -0.372417865 | 0.323405044  | -0.290779396 | 0.315148473 |
| BnaC04g08290D | -0.19592021  | 0.287721477 | 1.13402966   | 0.53421   | 0.145116708  | 0.266489661 | 0.805827452  | 0.475181849  | 0.402387242  | 0.373956462 |
| BnaC04g08340D | -1.601738213 | 0.350644176 | -1.305345211 | 0.3206634 | -0.653268514 | 0.280724929 | -2.186700714 | 0.374097362  | -0.244803669 | 0.257373014 |
| BnaC04g12330D | 0            | 0.22451918  | 0            | 0.2263112 | 0            | 0.21244364  | 2.874469118  | 0.260578481  | 0            | 0.223935767 |
| BnaC04g22430D | 2.28757659   | 0.308471151 | 5.227686721  | 0.6216206 | -0.180572246 | 0.219924531 | 1.338801913  | 0.266113195  | 2.021061616  | 0.297934499 |
| BnaC04g27380D | -1.77844223  | 0.392751154 | 4.33905658   | 0.8279946 | 0.44823755   | 0.290361143 | 1.208979704  | 0.445738226  | -0.829426159 | 0.335763852 |
| BnaC04g32490D | 0            | 0.22451918  | 0            | 0.2263112 | 0            | 0.21244364  | 0            | 0.226982722  | 2.502500341  | 0.251349554 |
| BnaC04g35730D | -0.563429339 | 0.302619412 | -0.508387976 | 0.2853702 | 0.178337241  | 0.247672954 | -2.885357434 | 0.446116894  | -0.905535316 | 0.348709007 |
| BnaC04g41990D | 0            | 0.22451918  | 0            | 0.2263112 | 0            | 0.21244364  | 3.169925001  | 0.272455881  | 4.087462841  | 0.322490665 |
| BnaC04g43020D | 3.115477217  | 0.266122001 | 2            | 0.2407733 | 2            | 0.249962574 | 0            | 0.226982722  | 0            | 0.223935767 |
| BnaC04g44010D | -5.544320516 | 0.639202244 | 0.415681416  | 0.3174139 | -0.698830465 | 0.364428124 | -0.989731665 | 0.41104548   | -1.736965594 | 0.522374423 |
| BnaC04g45680D | 0.342392197  | 0.292241273 | 1.580662363  | 0.5181893 | -0.443950191 | 0.289779932 | -0.017277991 | 0.228541424  | 0.471868722  | 0.329791028 |
| BnaC04g50810D | -6.94641896  | 0.618225292 | -6.94641896  | 0.5860919 | 0.447721829  | -0.94641896 | -0.94641896  | 0.615253607  | -6.94641896  | 0.636078235 |
| BnaC04g51450D | -1.03562391  | 0.278439713 | 3.624015277  | 0.634612  | -1.965234582 | 0.291523565 | -1.898120386 | 0.304999296  | -0.474908955 | 0.257617387 |
| BnaC04g52010D | -0.578359766 | 0.26805717  | -0.659659868 | 0.2650719 | -0.308752706 | 0.240092994 | -2.44625623  | 0.337617563  | -0.618437205 | 0.274402057 |
| BnaC05g00500D | 1.610298284  | 0.601879249 | -1.253975067 | 0.4086772 | 0.1477649794 | 0.950894528 | 0.950894528  | 0.461496971  | 1.462526425  | 0.61303674  |
| BnaC05g00840D | 1.47846246   | 0.737761545 | -5.297680549 | 0.9100996 | 0.361668569  | 0.417157614 | 0.343122814  | 0.4204041724 | 0.651132898  | 0.582820371 |
| BnaC05g04250D | 0.983835181  | 0.498555779 | -7.902877533 | 0.7043485 | -0.156923156 | 0.261776128 | -0.044896538 | 0.236403184  | -0.743006196 | 0.417738825 |
| BnaC05g06410D | -0.161918562 | 0.254836821 | -1.395408693 | 0.3665306 | 0.189553808  | 0.251505865 | -0.642930099 | 0.384263676  | -0.229822627 | 0.267493571 |
| BnaC05g07150D | -0.151442715 | 0.265140107 | 1.191067845  | 0.4999868 | -0.072408496 | 0.23307795  | -0.496553526 | 0.35426645   | -0.05729874  | 0.251827292 |
| BnaC05g13640D | -0.426219353 | 0.381650904 | 0.999273385  | 0.5552899 | -0.34002071  | 0.352216087 | -0.019011969 | 0.233655641  | -0.56225945  | 0.457142291 |
| BnaC05g14070D | -0.845526538 | 0.590701944 | -1.41105954  | 0.687486  | 0.313358886  | 0.391258498 | 0.363437037  | 0.410671827  | -0.203458472 | 0.356018176 |
| BnaC05g14250D | -1.226068079 | 0.36610571  | 1.682538989  | 0.5064528 | 0.61762889   | 0.326598771 | 1.080319165  | 0.425565624  | 1.061425548  | 0.436599335 |
| BnaC05g17030D | -0.659683191 | 0.443466219 | -0.399830032 | 0.3532794 | -0.3465675   | 0.3509612   | -0.727342245 | 0.462729843  | -0.159802191 | 0.300133855 |
| BnaC05g17910D | -1.119264901 | 0.529060552 | 1.311628746  | 0.6065752 | 0.510026757  | 0.413494223 | 0.71489846   | 0.417133453  | 1.289999931  | 0.675979253 |
| BnaC05g20740D | 0            | 0.22451918  | 0            | 0.2263112 | 0            | 0.21244364  | 3.700439718  | 0.298240516  | 3.662965013  | 0.294931576 |
| BnaC05g22860D | 0.202492864  | 0.243029871 | 0.704993204  | 0.269836  | -2.102361718 | 0.288754007 | 0.167727446  | 0.242792103  | -4.604862058 | 0.361596921 |
| BnaC05g30570D | -0.132315229 | 0.268671404 | 1.020226658  | 0.5130244 | 0.150597643  | 0.269646694 | 0.343400902  | 0.338584403  | 0.064557812  | 0.250486544 |
| BnaC05g35410D | 2.050140644  | 0.652662563 | 2.620300303  | 0.701984  | -0.412693559 | 0.293799975 | -0.64056111  | 0.328246357  | -0.375699351 | 0.305219451 |
| BnaC05g36490D | -0.548557509 | 0.459385678 | 0.121925183  | 0.2812643 | -0.097508053 | 0.268882754 | 0.028426934  | 0.239782574  | 0.140686828  | 0.309472859 |
| BnaC05g36990D | -0.197680668 | 0.263196132 | -0.873736227 | 0.3318759 | -0.053771256 | 0.223662774 | -0.657112286 | 0.327160168  | 0.383914982  | 0.308275212 |
| BnaC05g39780D | 0            | 0.22451918  | 0            | 0.2263112 | 0            | 0.21244364  | 0            | 0.226982722  | 0            | 0.223935767 |
| BnaC05g40470D | 0            | 0.22451918  | 0            | 0.2263112 | 1.874469118  | 0.229217302 | 1.874469118  | 0.24405844   | 2.736965594  | 0.256833633 |
| BnaC05g40480D | 2.662965013  | 0.251618144 | 0            | 0.2263112 | 2.736965594  | 0.243100321 | 2.807354922  | 0.243100321  | 0.223935767  | 0           |
| BnaC05g41910D | -0.711037332 | 0.520547131 | -3.385275505 | 0.8004707 | -0.399724564 | 0.414174504 | -0.726791734 | 0.527585508  | -1.261360329 | 0.700302054 |
| BnaC05g42410D | 0            | 0.22451918  | 6.62935662   | 0.5482934 | 0            | 0.21244364  | 0            | 0.226982722  | 0            | 0.223935767 |
| BnaC05g43350D | -1.486498172 | 0.70803172  | -3.393616124 | 0.8171299 | 0.346543394  | 0.403278999 | -0.030169969 | 0.241121121  | -0.017796158 | 0.237710909 |
| BnaC05g43530D | 0.686154251  | 0.382265138 | 1.82164143   | 0.593084  | 0.745370294  | 0.396665528 | 0.202338474  | 0.275689968  | 0.289801315  | 0.300695252 |
| BnaC05g44010D | -3.459431619 | 0.281262109 | -3.459431619 | 0.2775591 | -3.459431619 | 0.268900366 | -3.459431619 | 0.285733471  | -3.459431619 | 0.284370707 |
| BnaC05g44230D | 0.816914633  | 0.470292191 | 0.543431278  | 0.3723119 | 0.311079477  | 0.317528356 | 0.454211752  | 0.365189862  | 0.279047929  | 0.32717594  |
| BnaC05g45330D | -0.175442006 | 0.256001444 | -2.607158247 | 0.4992254 | -1.463567393 | 0.376239477 | -1.94596016  | 0.411534644  | -6.448460501 | 0.570042534 |
| BnaC05g46800D | -0.876794859 | 0.56244276  |              |           |              |             |              |              |              |             |

|               |              |             |              |           |              |             |              |             |              |             |
|---------------|--------------|-------------|--------------|-----------|--------------|-------------|--------------|-------------|--------------|-------------|
| BnaC07g13600D | -1.543291631 | 0.656262109 | 1.955988088  | 0.7424024 | 0.047198444  | 0.238617951 | 0.743600866  | 0.524724367 | 0.999762461  | 0.651229349 |
| BnaC07g16030D | -0.953146187 | 0.397951231 | 1.627289498  | 0.5756917 | -0.637741215 | 0.346853095 | -1.008428622 | 0.480153246 | 0.997195927  | 0.509310384 |
| BnaC07g18400D | -0.858350182 | 0.540026507 | 0.641081533  | 0.4757146 | -0.597816424 | 0.473874124 | -0.561916388 | 0.45317887  | -0.270772595 | 0.36886662  |
| BnaC07g25120D | -0.002970037 | 0.225129011 | 2.194197272  | 0.7532033 | -0.046737155 | 0.235544577 | -0.442746483 | 0.385428775 | 0.024272271  | 0.234699179 |
| BnaC07g25380D | -0.511713519 | 0.271713956 | 2.092169844  | 0.4958523 | -0.777607579 | 0.280192152 | 0.922832139  | 0.343138866 | 0.989946335  | 0.365095195 |
| BnaC07g25960D | 0            | 0.22451918  | 0            | 0.2263112 | 2.87469118   | 0.244608387 | 2.874469118  | 0.260578481 | 0            | 0.223935767 |
| BnaC07g27140D | -1.496997211 | 0.705180704 | -5.3105219   | 0.8838635 | -0.20157932  | 0.325497992 | -1.112813742 | 0.642984519 | -0.005280934 | 0.230007661 |
| BnaC07g28070D | 0.37227518   | 0.281620962 | 2.58271356   | 0.6228183 | 0.020084246  | 0.214971028 | 0.065887936  | 0.236828085 | 0.13504996   | 0.250004403 |
| BnaC07g28680D | 0            | 0.22451918  | 0            | 0.2263112 | 0            | 0.21244364  | 0            | 0.226982722 | 2.415037499  | 0.247556272 |
| BnaC07g31380D | 0            | 0.22451918  | 0            | 0.2263112 | 0            | 0.21244364  | 4.115477217  | 0.321827997 | 3.459431619  | 0.284370707 |
| BnaC07g31550D | 0            | 0.22451918  | 3.115477217  | 0.2627866 | 0            | 0.21244364  | 0            | 0.226982722 | 3.115477217  | 0.268165046 |
| BnaC07g31640D | -1.573589205 | 0.722964881 | -0.004288208 | 0.2278017 | -1.220728221 | 0.680193033 | -2.914116427 | 0.822686604 | -0.162380178 | 0.327364912 |
| BnaC07g32760D | 0.062872478  | 0.248315809 | 1.137795597  | 0.58428   | -0.01778134  | 0.22070168  | 0.059022208  | 0.250722111 | -0.063217805 | 0.255184667 |
| BnaC07g33430D | -1.374218595 | 0.587560323 | 0.583369243  | 0.4259947 | 0.026819598  | 0.225329353 | -0.340559283 | 0.351064673 | 0.17947776   | 0.311804308 |
| BnaC07g33650D | -1.054098734 | 0.57835121  | -1.59269815  | 0.6366947 | -0.51476738  | 0.435454754 | -0.297850741 | 0.355152964 | -0.174413453 | 0.317660449 |
| BnaC07g34310D | 0.33113115   | 0.369799923 | 0.171597754  | 0.2655101 | -0.19035571  | 0.30655717  | -0.401976969 | 0.38950826  | -0.45648958  | 0.439567262 |
| BnaC07g34790D | 0            | 0.22451918  | 0            | 0.2263112 | 0            | 0.21244364  | 0            | 0.226982722 | 0            | 0.223935767 |
| BnaC07g35020D | -0.618693358 | 0.417556096 | -2.560917027 | 0.633542  | 0.00504263   | 0.215010656 | 0.106121186  | 0.26959826  | 0.737571641  | 0.524507732 |
| BnaC07g36700D | -0.0489096   | 0.227618972 | 0.468148836  | 0.2662431 | -0.736965594 | 0.269135933 | 0.560714954  | 0.286728574 | 1.659163443  | 0.461087481 |
| BnaC07g37430D | 0            | 0.22451918  | 0            | 0.2263112 | 2.807354922  | 0.244608387 | 3.807354922  | 0.304259572 | 3.772589504  | 0.301360122 |
| BnaC07g39760D | 0            | 0.22451918  | 2.807354922  | 0.2544626 | 0            | 0.21244364  | 0            | 0.226982722 | 2.874469118  | 0.258500211 |
| BnaC07g43900D | -0.251061764 | 0.253934182 | 0.896164189  | 0.3201218 | 0.222392421  | 0.241380905 | 0.096861539  | 0.239646078 | 0.766712938  | 0.32976461  |
| BnaC07g45320D | 1.126997666  | 0.619714062 | 0.630300457  | 0.4492365 | 0.147321988  | 0.283714643 | 0.763541247  | 0.514015111 | 0.134421499  | 0.292373366 |
| BnaC07g46430D | 4.48112669   | 0.343167688 | 2.807354922  | 0.2544626 | 0            | 0.21244364  | 0            | 0.226982722 | 5.073248982  | 0.407278345 |
| BnaC07g47650D | -2.807354922 | 0.256930501 | -2.807354922 | 0.2544626 | 2.349149564  | 0.321896245 | 0.777607579  | 0.250946669 | 0.817135943  | 0.248835376 |
| BnaC07g48440D | -1.723371292 | 0.719352126 | -0.547004445 | 0.4464603 | -0.057700107 | 0.247774226 | 0.26265728   | 0.354063193 | -0.348318559 | 0.419493466 |
| BnaC07g06060D | -3.222392421 | 0.268539311 | 0.777607579  | 0.2505504 | 0.211508315  | 0.326402832 | 3.135159583  | 0.241865687 | 0.86507042   | 0.259354415 |
| BnaC08g10700D | -0.700112959 | 0.491438145 | 0.248363176  | 0.3286858 | -0.03796785  | 0.233382648 | 0.25604586   | 0.344246451 | -0.048744334 | 0.25361936  |
| BnaC08g17410D | -0.05544327  | 0.243401934 | 0.411796215  | 0.3474079 | -0.063541795 | 0.236522068 | -0.426305226 | 0.354930607 | -0.046054368 | 0.244965039 |
| BnaC08g17650D | 0            | 0.22451918  | 0            | 0.2263112 | 0            | 0.21244364  | 0            | 0.226982722 | 0            | 0.223935767 |
| BnaC08g18080D | 1.697696951  | 0.566810648 | -0.004459648 | 0.2263112 | 0.797141109  | 0.380431241 | -0.205423683 | 0.286472049 | 0.207044457  | 0.271610483 |
| BnaC08g18090D | 0            | 0.22451918  | 5.247927513  | 0.4002409 | 3.584962501  | 0.275173377 | 3.502500341  | 0.26733471  | 4.89077093   | 0.389404787 |
| BnaC08g18260D | 0            | 0.22451918  | 0            | 0.2263112 | 0            | 0.21244364  | 0            | 0.226982722 | 0            | 0.223935767 |
| BnaC08g18470D | 0            | 0.22451918  | 6.48657176   | 0.5500458 | 0            | 0.21244364  | 0            | 0.226982722 | 2.662965013  | 0.252892846 |
| BnaC08g18480D | -0.761147802 | 0.570297915 | -0.267611023 | 0.3595693 | 0.11017333   | 0.283774085 | 0.440005561  | 0.448901863 | 0.299969468  | 0.418137307 |
| BnaC08g20580D | -2.938599455 | 0.260714978 | 2.38332864   | 0.325848  | 1.88582898   | 0.294748846 | -0.064130337 | 0.226982722 | 0.935869663  | 0.256159956 |
| BnaC08g23560D | -0.234108891 | 0.3187216   | 0.871957686  | 0.5210843 | -0.301373917 | 0.341063    | 0.059351401  | 0.251954983 | -0.086705676 | 0.270787101 |
| BnaC08g24310D | 0            | 0.22451918  | 0            | 0.2263112 | 0            | 0.21244364  | 0            | 0.226982722 | 0            | 0.223935767 |
| BnaC08g26660D | -0.736965594 | 0.348231269 | 0.934411658  | 0.4064823 | 0.014178935  | 0.213982528 | 0.099773135  | 0.251186639 | -0.639410285 | 0.350131213 |
| BnaC08g28910D | -0.116023796 | 0.243914897 | 0.915607813  | 0.3530285 | 0.131529623  | 0.236363556 | 3.20E-16     | 0.226982722 | 0.632268215  | 0.33621297  |
| BnaC08g30340D | 1.925999419  | 0.529734228 | 2.187627003  | 0.5392604 | 0.321928935  | 0.258198598 | 0.49683159   | 0.296021346 | 0.328325866  | 0.273261651 |
| BnaC08g30630D | 0            | 0.22451918  | 0            | 0.2263112 | 0            | 0.21244364  | 0            | 0.226982722 | 2.874469118  | 0.258500211 |
| BnaC08g31190D | -0.556922681 | 0.438990454 | -1.483311438 | 0.6083012 | -1.397154794 | 0.638988693 | -1.636136814 | 0.66493184  | -1.230175493 | 0.647352408 |
| BnaC08g36920D | -0.784184318 | 0.502580225 | 0.006249952  | 0.2296026 | 0.283848889  | 0.347119483 | 0.680549083  | 0.500299412 | 0.615263654  | 0.522394237 |
| BnaC08g37160D | 0            | 0.22451918  | 0            | 0.2263112 | 0            | 0.21244364  | 3.584962501  | 0.291867008 | 0            | 0.223935767 |
| BnaC08g37480D | 0            | 0.22451918  | 0            | 0.2263112 | 0            | 0.21244364  | 0            | 0.226982722 | 3            | 0.264244073 |
| BnaC08g37720D | 0.496483677  | 0.382608581 | 1.090774753  | 0.5247631 | -0.887220615 | 0.445797668 | 0.12400664   | 0.268671404 | -0.259686731 | 0.315883793 |
| BnaC08g38370D | 0            | 0.22451918  | 2.736965594  | 0.2526947 | -2.736965594 | 0.243100321 | 0.243100321  | 0.243100321 | 0.427927513  | 0.334394445 |
| BnaC08g42690D | 0            | 0.22451918  | 0            | 0.2263112 | 0            | 0.21244364  | 2.662965013  | 0.255299148 | 2.662965013  | 0.252892846 |
| BnaC08g48430D | -0.326732888 | 0.341380024 | 0.367434809  | 0.3497085 | -0.389978025 | 0.359291891 | -0.280499548 | 0.327626898 | -0.389978025 | 0.383889887 |
| BnaC08g48630D | -2.284586841 | 0.802802142 | 0.787882525  | 0.554253  | -0.742387267 | 0.569608827 | -2.958728106 | 0.837516292 | -0.540787306 | 0.531204868 |
| BnaC09g01940D | -0.750106694 | 0.39934922  | 0.755164331  | 0.1495223 | -0.257066683 | 0.28915469  | -1.489169229 | 0.518085241 | -0.507648649 | 0.372190813 |
| BnaC09g02330D | 0.596644306  | 0.272988658 | 2.436863862  | 0.4693169 | 0.449802917  | 0.249324122 | 0.085391491  | 0.236273292 | -0.249027548 | 0.2443442   |
| BnaC09g02660D | -0.992305608 | 0.320106379 | 2.011526253  | 0.5175794 | -0.173053524 | 0.235036017 | -1.224966365 | 0.341749886 | -0.558209773 | 0.29182738  |
| BnaC09g03530D | -4.029747343 | 0.311179066 | -4.029747343 | 0.3056399 | -1.527247003 | 0.258504614 | -0.570315725 | 0.250647258 | -0.060120992 | 0.229884374 |
| BnaC09g05060D | 0            | 0.22451918  | 0            | 0.2263112 | 2.662965013  | 0.239348868 | 0            | 0.226982722 | 0            | 0.223935767 |
| BnaC09g05300D | -1.676592976 | 0.365046761 | -1.022367813 | 0.313396  | 0.682688533  | 0.317380852 | 0.28748745   | 0.269413399 | 1.814734452  | 0.556828789 |
| BnaC09g05650D | 0.253815876  | 0.301109144 | 0.161528286  | 0.2693913 | 0.27978356   | 0.302962855 | 0.275234859  | 0.310595653 | 1.449540347  | 0.65623569  |
| BnaC09g07170D | -1.102497074 | 0.439056501 | 0.158889479  | 0.2647042 | -0.281094377 | 0.28699056  | -0.449971289 | 0.330471309 | 0.290761135  | 0.316084135 |
| BnaC09g10430D | 0.197345003  | 0.29283129  | -0.3143435   | 0.3071084 | 0.344919738  | 0.333183627 | -0.256098359 | 0.307022526 | 0.187202993  | 0.298874564 |
| BnaC09g11720D | 0            | 0.22451918  | 3.222392421  | 0.2654263 | 0            | 0.21244364  | 0            | 0.226982722 | 0            | 0.223935767 |
| BnaC09g12530D | 0            | 0.22451918  | 0            | 0.2263112 | 0            | 0.21244364  | 0            | 0.226982722 | 0            | 0.223935767 |
| BnaC09g13310D | -2.662965013 | 0.251618144 | -2.662965013 | 0.2496566 | -2.662965013 | 0.239348868 | -2.662965013 | 0.255299148 | -2.662965013 | 0.252892846 |
| BnaC09g15550D | -0.297748282 | 0.336362676 | -0.085381579 | 0.2581083 | -0.437151339 | 0.381571467 | -0.366290465 | 0.35971459  | -0.330078936 | 0.367602769 |
| BnaC09g29430D | -0.27860402  | 0.746145074 | -1.714914349 | 0.6884427 | -0.132956838 | 0.286048293 | -0.044857123 | 0.245147769 | 0.122991107  | 0.299079309 |
| BnaC09g29440D | 1.073336612  | 0.443380359 | -0.697676463 | 0.3155029 | 0.344758803  | 0.282114111 | -0.634482637 | 0.323877646 | -6.763765654 | 0.612961887 |
| BnaC09g33810D | 2.77118131   | 0.530890042 | 2.150559677  | 0.4207924 | 1.263034406  | 0.329027088 | 0.99034983   | 0.309512487 | 1.492280498  | 0.376259291 |
| BnaC09g34140D | 2.126305317  | 0.29276928  | -0.323788437 | 0.2598013 | 0.717499772  | 0.323948096 | -1.260062839 | 0.34654928  | -0.956056652 | 0.29097538  |
| BnaC09g35120D | -1.371367028 | 0.63372477  | -1.859202361 | 0.6639874 | -0.033880893 | 0.228466572 | -0.28553303  | 0.350432826 | -0.117183539 | 0.291076649 |
| BnaC09g36060D | -4.415037499 | 0.338183363 | -4.415037499 | 0.3309579 | -4.415037499 | 0.327201997 | -4.415037499 | 0.343660837 | -4.415037499 | 0.345725897 |
| BnaC09g40110D | 2.736965594  | 0.255312357 | 2.584962501  | 0.2496566 | 4.029747343  | 0.29295061  | 0.226982722  | 0           | 0            | 0.223935767 |
| BnaC09g40660D | 1.064599672  | 0.648173588 | -3.325639106 | 0.8160159 | 0.525585308  | 0.485414685 | 0.529497931  | 0.476507186 | 0.903028791  | 0.650813255 |
| BnaC09g41070D | 0            | 0.22451918  | 0            | 0.2263112 | 0            | 0.21244364  | 0            | 0.226982722 | 0            | 0.223935767 |
| BnaC09g41280D | -1.527247003 | 0.545994928 | -4.919564426 | 0.6843765 | 0.265602518  | 0.309155835 | -0.849680332 | 0.444190532 | -0.122856748 | 0.272279756 |
| BnaC09g42570D | 0.956599036  | 0.484556078 | -1.182034684 | 0.4286255 | 0.491365782  | 0.357233435 |              |             |              |             |

|               |              |             |              |           |              |             |              |             |              |             |
|---------------|--------------|-------------|--------------|-----------|--------------|-------------|--------------|-------------|--------------|-------------|
| BnaCngg28030D | -1.088579046 | 0.511051816 | -3.382310249 | 0.6590339 | -0.080297871 | 0.245497816 | 0.102285293  | 0.265232572 | 0.65004659   | 0.4871319   |
| BnaCngg28540D | 0            | 0.22451918  | 0            | 0.2263112 | 0            | 0.21244364  | 0            | 0.226982722 | 0            | 0.223935767 |
| BnaCngg29120D | -1.803254412 | 0.485967276 | -4.041659152 | 0.5512456 | -0.11388119  | 0.24317077  | -0.679715378 | 0.361189633 | -0.594575925 | 0.361975589 |
| BnaCngg31260D | 0.859438672  | 0.38943781  | 0.482738992  | 0.3030751 | 0.257541407  | 0.264371764 | 0.068822033  | 0.240390204 | 0.718044732  | 0.381483585 |
| BnaCngg31270D | 0.128054559  | 0.292258885 | 0.100470325  | 0.2740828 | -0.194132293 | 0.318290095 | -0.359567994 | 0.394501391 | -0.59381133  | 0.528507961 |
| BnaCngg35720D | 0            | 0.22451918  | 0            | 0.2263112 | 5.357552005  | 0.415103561 | 0            | 0.226982722 | 0            | 0.223935767 |
| BnaCngg35740D | 0            | 0.22451918  | 0            | 0.2263112 | 5.357552005  | 0.415103561 | 0            | 0.226982722 | 0            | 0.223935767 |
| BnaCngg43220D | 0.582519325  | 0.31016635  | -1.73940877  | 0.3507388 | 0.877794068  | 0.351469759 | -2.534588978 | 0.396746979 | -1.336649601 | 0.362448924 |
| BnaCngg43450D | 3.109624491  | 0.476463155 | 3.348262243  | 0.4821123 | 1.493539473  | 0.298546532 | 1.506959989  | 0.311810913 | 2.3594028    | 0.405445331 |
| BnaCngg44540D | -1.087462841 | 0.282142731 | -1.161463423 | 0.2784815 | -0.142604395 | 0.227376801 | -4.824428435 | 0.377267604 | -2.017073513 | 0.312792807 |
| BnaCngg46710D | -1.253756592 | 0.461613653 | -4.259050892 | 0.5922606 | -0.129767875 | 0.252161929 | -0.075050705 | 0.248844183 | -0.811238357 | 0.420724136 |
| BnaCngg47140D | -3.948367232 | 0.462791486 | -2.626439137 | 0.4028299 | -0.522102477 | 0.284542428 | -0.893084796 | 0.332582602 | -0.626439137 | 0.314915108 |
| BnaCngg49340D | -2.874469118 | 0.256930501 | -2.874469118 | 0.2544626 | -2.874469118 | 0.244608387 | -0.137503524 | 0.23380975  | -2.874469118 | 0.258500211 |
| BnaCngg49840D | -0.181750437 | 0.268299341 | -1.959358016 | 0.4575562 | 0.22575339   | 0.272215911 | -0.091147888 | 0.249594914 | 0.612183969  | 0.394589454 |
| BnaCngg51960D | 4.029747343  | 0.311179066 | 0            | 0.2263112 | 3            | 0.249962574 | 0            | 0.226982722 | 2.115477217  | 0.242580753 |
| BnaCngg52970D | 0            | 0.22451918  | 0            | 0.2263112 | 3.36923381   | 0.262696379 | 0            | 0.226982722 | 0            | 0.223935767 |
| BnaCngg52990D | 0.109902995  | 0.248641639 | -3.396129037 | 0.4798227 | -1.244125943 | 0.400095548 | -0.212907213 | 0.270511906 | 0.13438568   | 0.257786907 |
| BnaCngg58140D | 0            | 0.22451918  | 0            | 0.2263112 | 0            | 0.21244364  | 0            | 0.226982722 | 2.736965594  | 0.256833633 |
| BnaCngg59970D | -0.040845052 | 0.233547765 | 1.670054438  | 0.6013068 | 0.830472352  | 0.220510145 | -0.126177106 | 0.22693855  | 0.502918331  | 0.379112508 |
| BnaCngg61080D | -2.584962501 | 0.251618144 | -2.584962501 | 0.2496566 | 0.030749947  | 0.235586407 | 0.078002512  | 0.262982722 | -2.584962501 | 0.252892846 |
| BnaCngg61660D | 0            | 0.22451918  | 5.014950341  | 0.3782649 | 2.874469118  | 0.244608387 | 3.807354922  | 0.304239572 | 0            | 0.223935767 |
| BnaCngg62330D | -1.219969318 | 0.493239019 | -1.75105133  | 0.519552  | 0.464715147  | 0.367296752 | 0.081743149  | 0.253174645 | -0.114399373 | 0.266637166 |
| BnaCngg62710D | 0.620470602  | 0.39913787  | 0.511925465  | 0.3520069 | 0.468467509  | 0.355751788 | 1.170603119  | 0.550448677 | 1.549948911  | 0.665438198 |
| BnaCngg63810D | 0            | 0.22451918  | 0            | 0.2263112 | 0            | 0.21244364  | 2.807354922  | 0.260578481 | 2.807354922  | 0.258500211 |
| BnaCngg65380D | 0.635114705  | 0.377179541 | -7.351675438 | 0.6366661 | 0.052046748  | 0.226421325 | -1.135738039 | 0.421728046 | -0.171766348 | 0.270005548 |
| BnaCngg67570D | 1.481470623  | 0.520778294 | 0.19379693   | 0.2583967 | 0.306170909  | 0.274593539 | -1.312738923 | 0.391328948 | -0.234736411 | 0.271117334 |
| BnaCngg68780D | 0            | 0.22451918  | 2.415037499  | 0.244965  | 3.36923381   | 0.262696379 | 0            | 0.226982722 | 0            | 0.223935767 |
| BnaCngg69610D | 4.029747343  | 0.311179066 | 0            | 0.2263112 | 0            | 0.21244364  | 0            | 0.226982722 | 0            | 0.223935767 |
| BnaCngg72020D | 0.231822667  | 0.31537083  | -0.543500358 | 0.3859175 | -0.434257701 | 0.373824369 | -0.740250896 | 0.457820371 | -0.472241675 | 0.413001074 |
| BnaCngg76050D | 1.770469854  | 0.632738473 | -2.227068909 | 0.478832  | 0.526846755  | 0.351623868 | 0.866552726  | 0.439807232 | 0.434514874  | 0.346489838 |
| BnaCngg78680D | -1.846144871 | 0.702926309 | -1.514976104 | 0.6304462 | -0.090184713 | 0.261153087 | -0.999597181 | 0.578311582 | -0.730667654 | 0.548964828 |
| BnaCngg04070D | 0.711709894  | 0.444067244 | 1.234856387  | 0.5540372 | 0.26251273   | 0.302929832 | 0.173744873  | 0.284654708 | 0.029427972  | 0.235368453 |

# BnaC

| GeneID        | log2(Cold/Control)Prob. | log2(Heat/Control)Prob. | log2(Drought/Control)Prob. | log2(Salt/Control)Prob. | log2(ABA/Control)Prob. |
|---------------|-------------------------|-------------------------|----------------------------|-------------------------|------------------------|
| BnaA01g01440D | -0.614108846            | 0.280322044             | 0.415037499                | 0.2687925               | 0.146220741            |
| BnaA01g07600D | -0.332575339            | 0.257320177             | -0.133266531               | 0.2400006               | 0.606024116            |
| BnaA01g08340D | -4.736965594            | 0.365418824             | -4.736965594               | 0.3561613               | 0.776103988            |
| BnaA01g08370D | -0.442004547            | 0.30082074              | -2.791413378               | 0.4532742               | 0.066567617            |
| BnaA01g08830D | 0                       | 0.22451918              | 2.662965013                | 0.2496566               | 0                      |
| BnaA01g16400D | 2.505717881             | 0.805397777             | 2.696600388                | 0.7977716               | -0.217836354           |
| BnaA01g26760D | 0                       | 0.22451918              | 0                          | 0.2263112               | 0                      |
| BnaA01g28710D | 0.241621099             | 0.259918014             | -0.107528464               | 0.2390781               | -0.841634404           |
| BnaA01g28930D | -0.277109591            | 0.24938975              | 2.942856093                | 0.5710244               | -0.664132714           |
| BnaA01g28990D | 0.961525852             | 0.271161365             | -3.662965013               | 0.2864842               | -1                     |
| BnaA01g30220D | -3.700439718            | 0.29336847              | -3.700439718               | 0.2899842               | 0.28129293             |
| BnaA01g31650D | -0.384812241            | 0.38714599              | 1.25953746                 | 0.6416041               | -0.164797784           |
| BnaA01g31680D | -0.967484838            | 0.599347459             | 0.585103025                | 0.4751554               | -0.349917672           |
| BnaA01g31670D | 0.090123646             | 0.263647451             | 1.726465182                | 0.7057685               | -0.001836658           |
| BnaA01g31680D | 0                       | 0.22451918              | 0                          | 0.2263112               | 0                      |
| BnaA01g33090D | 0                       | 0.22451918              | 2.662965013                | 0.2496566               | 0                      |
| BnaA01g33110D | 0                       | 0.22451918              | 0                          | 0.2263112               | 0                      |
| BnaA01g34470D | -1.557995453            | 0.308686903             | -2.142957954               | 0.3118549               | -1.268488836           |
| BnaA02g01460D | 0.344804696             | 0.390804977             | 0.383551727                | 0.3943781               | 1.376084774            |
| BnaA02g04040D | -2.89704281             | 0.48532222              | 0.476932033                | 0.3102192               | -1.382469637           |
| BnaA02g06540D | -3.645716532            | 0.518457853             | 2.748815312                | 0.7110523               | 0.036711778            |
| BnaA02g06560D | 0.754703871             | 0.419249093             | -3.118786152               | 0.5325654               | 0.52183284             |
| BnaA02g09970D | 2.415037499             | 0.246560129             | 0                          | 0.2263112               | 0.234239054            |
| BnaA02g12310D | 0.263034406             | 0.249255874             | 0.407424315                | 0.2556954               | 0.736965594            |
| BnaA02g18100D | -2.557995453            | 0.30680457              | -2.557995453               | 0.3185301               | -2.557995453           |
| BnaA02g18390D | 0.773248299             | 0.44974506              | 2.082687282                | 0.6917622               | 1.044339539            |
| BnaA02g20430D | 0.778917674             | 0.33580348              | -5.906890596               | 0.4671966               | 0.779690932            |
| BnaA02g26420D | -0.683863185            | 0.374476029             | 0.26340485                 | 0.2880649               | -0.058986315           |
| BnaA02g33380D | -0.678071905            | 0.251066112             | -4                         | 0.3056399               | -4                     |
| BnaA02g33910D | 1.519026602             | 0.713352883             | 2.410019425                | 0.7864578               | 0.441845873            |
| BnaA02g34250D | -1.531804565            | 0.423196485             | 0.089963377                | 0.2432662               | -1.856531293           |
| BnaA03g01250D | 0.161216065             | 0.311872556             | 2.059417201                | 0.7726056               | 0.348682588            |
| BnaA03g02640D | 0.962245078             | 0.59406182              | 2.937673315                | 0.8206303               | 0.000443565            |
| BnaA03g02680D | -0.839781719            | 0.474096451             | 0.917647978                | 0.5139425               | -0.495573461           |
| BnaA03g04240D | -0.536512849            | 0.381186375             | 2.44864103                 | 0.7541367               | 1.970800024            |
| BnaA03g04640D | 0.336624606             | 0.313109831             | -2.480511337               | 0.5082933               | 0.509146719            |
| BnaA03g04920D | 0                       | 0.22451918              | 0                          | 0.2263112               | 0.169925601            |
| BnaA03g06460D | 2                       | 0.278307619             | -2.115477217               | 0.2407733               | 1.299560282            |
| BnaA03g07000D | -1.569020957            | 0.391073567             | 0.390789953                | 0.2834108               | 0.266496266            |
| BnaA03g08460D | -0.402632478            | 0.273466395             | 0.660208395                | 0.3072603               | 0.128642151            |
| BnaA03g08510D | 1.913960169             | 0.443582902             | -0.503766418               | 0.2543561               | -0.984893180           |
| BnaA03g19110D | 3.906890596             | 0.30533932              | 0                          | 0.2263112               | 0                      |
| BnaA03g19960D | -2                      | 0.241636285             | 2.297680549                | 0.2813171               | 0.807354922            |
| BnaA03g24360D | 0                       | 0.22451918              | 0                          | 0.2263112               | 2.502500341            |
| BnaA03g27400D | -0.064440999            | 0.248549174             | 0.49892267                 | 0.4007164               | 0.300509111            |
| BnaA03g31260D | 0.369025102             | 0.326944415             | -0.562495161               | 0.3378509               | -0.039348667           |
| BnaA03g31270D | -0.199769512            | 0.276161101             | 0.4439724                  | 0.324886                | 0.283666209            |
| BnaA03g32520D | -1.655783838            | 0.349415707             | -0.525723297               | 0.2711261               | -1.296241451           |
| BnaA03g32550D | 0.047305715             | 0.227618972             | -0.125530882               | 0.2353508               | 0.913288367            |
| BnaA03g33770D | -0.160464672            | 0.235593011             | -1.662965013               | 0.2713815               | 0.233199176            |
| BnaA03g33890D | 3.969626351             | 0.308750749             | 5.169925001                | 0.3931739               | 0                      |
| BnaA03g33910D | 0                       | 0.22451918              | 0                          | 0.2263112               | 0                      |
| BnaA03g39450D | -1.298034889            | 0.439170982             | -0.762703156               | 0.3501818               | 0.183403836            |
| BnaA03g39500D | -2.874469118            | 0.256930501             | -2.874469118               | 0.2544626               | 0.788495895            |
| BnaA03g48570D | 1.380257395             | 0.697679999             | 3.25412559                 | 0.8393458               | 0.254810622            |
| BnaA03g49310D | 2.308122295             | 0.326422646             | -2.807354922               | 0.2544626               | 0.254477967            |
| BnaA03g49460D | -0.606178987            | 0.277920145             | 0.111421283                | 0.2390781               | -0.242325199           |
| BnaA03g58970D | 0                       | 0.22451918              | 0                          | 0.2263112               | 0.351890257            |
| BnaA04g09470D | 1.248411071             | 0.401645444             | 1.813903708                | 0.4641432               | 0.360022808            |
| BnaA04g10830D | 0                       | 0.22451918              | 0                          | 0.2263112               | 0.321928095            |
| BnaA04g19530D | -1.564719281            | 0.53588758              | -2.685618714               | 0.581997                | -0.390162831           |
| BnaA04g24740D | -0.146693235            | 0.313473088             | 0.080418682                | 0.2357163               | 0.398866209            |
| BnaA05g01110D | 0                       | 0.22451918              | 0                          | 0.2263112               | 0.237018494            |
| BnaA05g10110D | -1.046012398            | 0.337624168             | 1.70689474                 | 0.4907689               | 0.43901247             |
| BnaA05g17900D | 0.336427665             | 0.273583078             | 0.313157885                | 0.2641252               | 1.330645312            |
| BnaA05g17950D | 0                       | 0.22451918              | 0                          | 0.2263112               | 0                      |
| BnaA05g18390D | -0.67556505             | 0.306771549             | 1.981058436                | 0.5388112               | 0.154509949            |
| BnaA05g18430D | 0.256945241             | 0.272004562             | 2.690388855                | 0.6851882               | -0.747419952           |
| BnaA05g22540D | -2.047934477            | 0.430078552             | -1.374744793               | 0.3705683               | -0.664930805           |

|               |              |             |              |           |              |             |              |             |              |             |
|---------------|--------------|-------------|--------------|-----------|--------------|-------------|--------------|-------------|--------------|-------------|
| BnaA05g24040D | -0.009235391 | 0.226716334 | -0.619567546 | 0.3799909 | 0.617471651  | 0.433607647 | 0.629423039  | 0.433270809 | 0.298326823  | 0.344123164 |
| BnaA05g24050D | 0.992840208  | 0.499051129 | 3.782064471  | 0.8355437 | -0.520122568 | 0.345961464 | 0.565100731  | 0.38643693  | -0.70734319  | 0.409956321 |
| BnaA05g26240D | 0            | 0.225169118 | 0            | 0.2263112 | 2.807354922  | 0.244608387 | 0            | 0.226982722 | 0            | 0.223935767 |
| BnaA05g26290D | 2.502500341  | 0.250160714 | 0            | 0.2263112 | 2.584962501  | 0.239348868 | 0            | 0.226982722 | 0            | 0.223935767 |
| BnaA05g28370D | -0.005327384 | 0.227803903 | 0.739826058  | 0.5063317 | -0.03981245  | 0.233842774 | -0.015627978 | 0.234492233 | 0.083824993  | 0.272502113 |
| BnaA05g32430D | -2.874469118 | 0.256930501 | -2.874469118 | 0.2544626 | 0.504568381  | 0.228607471 | -2.874469118 | 0.260578481 | -2.874469118 | 0.258500211 |
| BnaA05g34370D | 3.772589504  | 0.296939396 | 0            | 0.2263112 | 2.807354922  | 0.246068387 | 0            | 0.226982722 | 0            | 0.223935767 |
| BnaA05g37400D | 2.046693235  | 0.43334346  | 2.658963082  | 0.4890142 | 0.785495488  | 0.274983268 | 1.329501315  | 0.34734184  | 0.275634443  | 0.247589295 |
| BnaA05g37410D | 5.235216462  | 0.412186498 | 8.027905997  | 0.7195789 | 4.718818247  | 0.351890257 | 5.718818247  | 0.468081827 | 5.849665727  | 0.494500511 |
| BnaA06g01770D | 1.940920767  | 0.517396703 | 2.037360528  | 0.5030029 | 0.671377253  | 0.304325619 | -0.481869008 | 0.275980573 | 0.367509129  | 0.276803956 |
| BnaA06g08290D | 2.584962501  | 0.251618144 | 2.502500341  | 0.2479504 | 2.502500341  | 0.237869421 | 2.502500341  | 0.253714027 | 2.502500341  | 0.251349554 |
| BnaA06g15870D | 0.069974024  | 0.250929057 | 0.871912476  | 0.4984501 | -0.060347775 | 0.238562912 | -0.639261231 | 0.427383846 | -0.313715846 | 0.352748864 |
| BnaA06g19740D | -0.85025288  | 0.288436983 | -5.415037499 | 0.4158961 | -2.415037499 | 0.339590158 | -1.476438044 | 0.322477456 | 0.285402219  | 0.258379126 |
| BnaA06g21090D | 1.154328146  | 0.476080084 | 2.848858474  | 0.7194798 | 0.643235542  | 0.357325901 | -0.263034406 | 0.278695093 | 0.195550809  | 0.272491106 |
| BnaA06g21810D | 0.874469118  | 0.256930501 | 0            | 0.2263112 | 0            | 0.21244364  | 0            | 0.226982722 | 0            | 0.223935767 |
| BnaA06g22900D | 2.584962501  | 0.481544348 | 1.629172144  | 0.5972667 | 0.432621183  | 0.337690215 | 0.588002955  | 0.384713269 | 0.767681614  | 0.462707827 |
| BnaA06g23210D | 1.714245518  | 0.31300856  | 3.154818109  | 0.4326213 | 1.87036472   | 0.316103949 | -1           | 0.251534485 | 1.209453366  | 0.284125337 |
| BnaA06g23510D | -1.736140961 | 0.583604125 | -0.067114196 | 0.2478733 | 0.37935872   | 0.350888548 | 0.352775965  | 0.348685172 | 0.261796572  | 0.331517049 |
| BnaA06g27060D | 0.196325737  | 0.319813607 | 1.263361956  | 0.6215436 | -0.215855055 | 0.310399715 | -0.083618815 | 0.261771725 | -0.107183738 | 0.276568389 |
| BnaA06g31080D | 1.056583528  | 0.307700324 | 3.288569498  | 0.6896531 | -0.222392421 | 0.241380905 | 0.875218375  | 0.360168639 | 0.750771394  | 0.371710874 |
| BnaA06g34140D | -0.41349203  | 0.320936366 | 0.09643976   | 0.2499273 | 0.428313042  | 0.336144722 | -0.167028604 | 0.273757001 | -0.976990022 | 0.446002113 |
| BnaA06g39010D | -1.72631835  | 0.380473071 | -6.22881869  | 0.5018911 | -1.045596866 | 0.333586512 | -0.184424571 | 0.257111029 | -0.546994651 | 0.300710663 |
| BnaA06g40380D | 2.736965594  | 0.255312357 | 3.624490865  | 0.2834218 | 3.624490865  | 0.275137377 | 0            | 0.226982722 | 0            | 0.223935767 |
| BnaA07g02060D | -0.515211392 | 0.305598119 | -2.97783835  | 0.4442302 | -0.1406335   | 0.242182271 | -1.515211392 | 0.410057593 | -0.934510918 | 0.369231921 |
| BnaA07g03200D | 0.79673214   | 0.304814365 | -2.168037892 | 0.4378941 | -1           | 0.375563599 | -2.577428828 | 0.486757635 | 0.335460508  | 0.305323159 |
| BnaA07g05000D | 1.234853321  | 0.61196238  | 1.421951607  | 0.6196392 | -0.040483577 | 0.228649301 | 0.556215912  | 0.421276727 | 0.283951373  | 0.344138575 |
| BnaA07g08370D | 0.876617584  | 0.284108722 | -0.760812336 | 0.2531526 | 3.20E-16     | 0.21244364  | -1.608809243 | 0.38447389  | 0.278716028  | 0.244500511 |
| BnaA07g10300D | 3.45037646   | 0.764882525 | 3.501813016  | 0.7522764 | 0.154920577  | 0.241173958 | 0.579109774  | 0.324650393 | 0.921997488  | 0.40513271  |
| BnaA07g12690D | 0.149848209  | 0.249117176 | 0.20069735   | 0.252261  | 0.446980392  | 0.280176741 | -0.127489735 | 0.24882657  | 0.592122292  | 0.28289147  |
| BnaA07g13130D | -0.337869639 | 0.266027335 | -0.519109953 | 0.272676  | 0.380948609  | 0.266256296 | 0.099535674  | 0.241973123 | -0.44170545  | 0.27883159  |
| BnaA07g14730D | -0.074000581 | 0.228660309 | 6.40599236   | 0.8681466 | 0.867896464  | 0.255241907 | 2.185866545  | 0.37858636  | 2.329123596  | 0.409949716 |
| BnaA07g15270D | -0.387023123 | 0.265166526 | -2.350497247 | 0.3463357 | 0.097516506  | 0.225897355 | -0.362570079 | 0.265430713 | 1.266174113  | 0.424719962 |
| BnaA07g17790D | 0.005088877  | 0.22451918  | -0.127849955 | 0.2465325 | -0.190461932 | 0.248196625 | -1.262015193 | 0.378623653 | -0.769618811 | 0.340037074 |
| BnaA07g24270D | -1.309173115 | 0.702373719 | 1.622145701  | 0.7288717 | -0.042400417 | 0.23856071  | 0.685717025  | 0.549680616 | 0.543300149  | 0.536715365 |
| BnaA07g28000D | -0.519496158 | 0.441894308 | 2.96995336   | 0.8242519 | 0.040418312  | 0.234485628 | 1.045037214  | 0.628438832 | 1.277931924  | 0.720450703 |
| BnaA07g29730D | 2.662965013  | 0.251618144 | 3.938599455  | 0.3001427 | 2.584962501  | 0.239348868 | 0            | 0.226982722 | 3.459431619  | 0.284370707 |
| BnaA07g32710D | 3.415037499  | 0.278780954 | 2.502500341  | 0.2479504 | 3.969626351  | 0.297018652 | 0            | 0.226982722 | 0            | 0.223935767 |
| BnaA07g35010D | 1.417085328  | 0.367252721 | -0.350907162 | 0.2467637 | 0.373458396  | 0.245777414 | 0.398549376  | 0.261040808 | -0.626541604 | 0.265192944 |
| BnaA07g37110D | -0.630613613 | 0.316834866 | 0.286493379  | 0.2714674 | 0.069262662  | 0.227916182 | -1.793233814 | 0.260498612 | -0.538419915 | 0.21624705  |
| BnaA08g00130D | 0.407877608  | 0.284460971 | -0.704015172 | 0.2912418 | 0.551241883  | 0.29704507  | 0.531613076  | 0.305879918 | 1.227484891  | 0.450306457 |
| BnaA08g06490D | 0.019306426  | 0.230751788 | 0.377899865  | 0.3543098 | 0.053760482  | 0.23544577  | 0.030594498  | 0.236627743 | -0.219009782 | 0.321854415 |
| BnaA08g13670D | -2.584962501 | 0.251618144 | -2.584962501 | 0.2496566 | -2.584962501 | 0.239348868 | -2.584962501 | 0.255299148 | -2.584962501 | 0.252892846 |
| BnaA08g18520D | -3.510405539 | 0.261224418 | 3.699047827  | 0.843379  | 0.294011325  | 0.294011325 | 0.223782971  | 0.302637025 | -0.291982019 | 0.329606111 |
| BnaA08g24840D | 0.736965594  | 0.244328789 | -0.169925001 | 0.2322334 | -0.169925001 | 0.219924531 | -0.08246216  | 0.226982722 | 0.784271309  | 0.245229226 |
| BnaA08g29850D | 0            | 0.22451918  | 1.874469118  | 0.2401326 | 0            | 0.21244364  | 0            | 0.226982722 | 0            | 0.223935767 |
| BnaA08g30060D | 0            | 0.22451918  | 1.874469118  | 0.2401326 | 0            | 0.21244364  | 0            | 0.226982722 | 0            | 0.223935767 |
| BnaA09g00360D | 1.584962501  | 0.237046039 | 0            | 0.2263112 | 0            | 0.21244364  | 0            | 0.226982722 | 0            | 0.223935767 |
| BnaA09g00440D | 0            | 0.22451918  | 0            | 0.2263112 | 2.662965013  | 0.239348868 | 0            | 0.226982722 | 0            | 0.223935767 |
| BnaA09g02500D | 0            | 0.22451918  | 6.163230349  | 0.4948748 | 2.321928095  | 0.234239054 | 3.222392421  | 0.272455881 | 0            | 0.223935767 |
| BnaA09g04810D | -0.008782073 | 0.227337173 | 1.538164726  | 0.6506658 | -0.313924555 | 0.330649635 | -0.469560118 | 0.381056483 | -0.210122336 | 0.314972348 |
| BnaA09g06060D | 0            | 0.22451918  | 0            | 0.2263112 | 0            | 0.21244364  | 0            | 0.226982722 | 0            | 0.223935767 |
| BnaA09g06870D | -0.062644937 | 0.235652453 | 1.910428282  | 0.5809336 | -0.024732521 | 0.216633203 | 0.731232481  | 0.37082673  | -0.532787036 | 0.322761457 |
| BnaA09g08940D | 1.018859027  | 0.53330075  | -2.191343985 | 0.5590854 | -0.275234859 | 0.302258357 | -0.352624892 | 0.328749692 | -0.940498988 | 0.485295801 |
| BnaA09g08950D | 0            | 0.22451918  | 2.736965594  | 0.2526947 | 4.89077093   | 0.36890609  | 2.736965594  | 0.258914104 | 0            | 0.223935767 |
| BnaA09g12800D | 0            | 0.22451918  | -2.502500341 | 0.2479504 | 1.527247003  | 0.258504614 | -2.502500341 | 0.253714027 | -2.502500341 | 0.251349554 |
| BnaA09g13880D | 0            | 0.22451918  | 0            | 0.2263112 | 0            | 0.21244364  | 0            | 0.226982722 | 0            | 0.223935767 |
| BnaA09g19070D | 2.206450877  | 0.458177023 | 0.222392421  | 0.2414469 | 0.703282468  | 0.268774878 | 0.534776744  | 0.470456573 | 1.018378529  | 0.323135722 |
| BnaA09g19790D | 0            | 0.22451918  | 6.491853096  | 0.5318851 | 0            | 0.21244364  | 0            | 0.226982722 | 0            | 0.223935767 |
| BnaA09g19800D | 0            | 0.22451918  | 4.196397213  | 0.316126  | 0            | 0.21244364  | 0            | 0.226982722 | 0            | 0.223935767 |
| BnaA09g23230D | -0.02127666  | 0.232356723 | -0.303899218 | 0.3732521 | -0.064795123 | 0.243906069 | 0.262673326  | 0.340248424 | 0.009715155  | 0.229144651 |
| BnaA09g24190D | -2.502500341 | 0.250160714 | -2.502500341 | 0.2479504 | -2.502500341 | 0.237869421 | -2.502500341 | 0.253714027 | -2.502500341 | 0.251349554 |
| BnaA09g28720D | 0.045196553  | 0.237942073 | 0.905123669  | 0.4619175 | -0.476975575 | 0.346456814 | -0.06501353  | 0.247732396 | -0.345517341 | 0.334293212 |
| BnaA09g35990D | 0            | 0.22451918  | 0            | 0.2263112 | 0            | 0.21244364  | 0            | 0.226982722 | 0            | 0.223935767 |
| BnaA09g41400D | 0            | 0.22451918  | 0            | 0.2263112 | 0            | 0.21244364  | 0            | 0.226982722 | 0            | 0.223935767 |
| BnaA09g47260D | 0.479167837  | 0.244066804 | 0.277533976  | 0.2362975 | -0.090197809 | 0.218825954 | 0.977973694  | 0.271245024 | -3.459431619 | 0.284370707 |
| BnaA09g51460D | 0.469485283  | 0.247340519 | -1.478047297 | 0.2550526 | -0.530514717 | 0.23200007  | -3.700439718 | 0.298240516 | -0.530514717 | 0.245055303 |
| BnaA09g51470D | 1.94753258   | 0.277810067 | 0            | 0.2263112 | -2.22392421  | 0.233252756 | -2.22392421  | 0.248806756 | -2.22392421  | 0.246453292 |
| BnaA09g51610D | 0            | 0.22451918  | 0            | 0.2263112 | 2.115477217  | 0.229679629 | 0            | 0.226982722 | 0            | 0.223935767 |
| BnaA09g51620D | 1.351036952  | 0.672853042 | -0.371383149 | 0.3570507 | 1.754258229  | 0.743987548 | 1.352643389  | 0.677491722 | -0.221806793 | 0.334766547 |
| BnaA10g00280D | 0.518989612  | 0.466890785 | 2.866433871  | 0.8241528 | 0.63317529   | 0.521456374 | 1.135374286  | 0.667175226 | 0.71446022   | 0.587256508 |
| BnaA10g00630D | 1.585785722  | 0.612710909 | 0.510615159  | 0.3410828 | 0.97382511   | 0.482658336 | 0.709532364  | 0.41124232  | 1.037791385  | 0.534168164 |
| BnaA10g00870D | -1.523561956 | 0.26665698  | -1.523561956 | 0.2614855 | -0.665580961 | 0.238778664 | -3.938599455 | 0.31044334  | -3.938599455 | 0.310091497 |
| BnaA10g00890D | 0            | 0.22451918  | 3.772589504  | 0.2922413 | 2.938599455  | 0.248216739 | 3.415037499  | 0.283188471 | 0            | 0.223935767 |
| BnaA10g00910D | 0            | 0.22451918  | 4.169925001  | 0.316126  | 0            | 0.21244364  | 0            | 0.226982722 | 0            | 0.223935767 |
| BnaA1         |              |             |              |           |              |             |              |             |              |             |

|               |              |             |              |           |              |             |              |             |              |             |
|---------------|--------------|-------------|--------------|-----------|--------------|-------------|--------------|-------------|--------------|-------------|
| BnaC01g36040D | 0            | 0.22451918  | 0            | 0.2263112 | 4.058893689  | 0.30296946  | 0            | 0.226982722 | 0            | 0.223935767 |
| BnaC01g36350D | 0            | 0.22451918  | 0            | 0.2263112 | 0            | 0.21244364  | 0            | 0.226982722 | 0            | 0.223935767 |
| BnaC01g38180D | 0            | 0.22451918  | 0            | 0.2263112 | 2.662965013  | 0.239348868 | 3.584962501  | 0.291867008 | 0            | 0.223935767 |
| BnaC01g40250D | -0.084888898 | 0.244209905 | 4.219887614  | 0.8529948 | 0.565591716  | 0.363611346 | 2.096326117  | 0.690522738 | 2.601356939  | 0.776365846 |
| BnaC01g40260D | 0.528467614  | 0.306115485 | 2.888602981  | 0.6652423 | 1.136294224  | 0.416083254 | 0.668901319  | 0.33206964  | 0.163261271  | 0.254874247 |
| BnaC01g43150D | 0            | 0.22451918  | 0            | 0.2263112 | 0            | 0.21244364  | 0            | 0.226982722 | 0            | 0.223935767 |
| BnaC02g00940D | -0.615261101 | 0.42623023  | 1.20783177   | 0.5932117 | -0.269752028 | 0.320016115 | -0.372176285 | 0.356821744 | -0.011509748 | 0.228367501 |
| BnaC02g00990D | 1.632550582  | 0.750697894 | 2.37318192   | 0.7957484 | -1.18705323  | 0.668425711 | -0.481929383 | 0.448085086 | -0.533708676 | 0.511586794 |
| BnaC02g01470D | 0.024247546  | 0.226284829 | 1.262015193  | 0.3561613 | -2.712718048 | 0.335706612 | 0.30718151   | 0.259931223 | 0            | 0.223935767 |
| BnaC02g02740D | -0.640608472 | 0.444201539 | 0.722088521  | 0.47313   | -0.561704445 | 0.426364525 | -0.198413558 | 0.307004914 | -0.1278641   | 0.288613107 |
| BnaC02g04540D | -0.219183131 | 0.343447286 | 0.012675717  | 0.2323149 | -0.206843778 | 0.337536106 | 0.495880332  | 0.471765032 | -0.079777871 | 0.280991317 |
| BnaC02g07990D | -2.552296312 | 0.484633133 | 0.812067049  | 0.3786634 | -1.142652071 | 0.395441456 | -1.305502547 | 0.414771126 | 0.370299185  | 0.314485804 |
| BnaC02g09420D | 2.415037499  | 0.246506129 | 0            | 0.2263112 | 0            | 0.21244364  | 0            | 0.226982722 | 0            | 0.223935767 |
| BnaC02g10100D | -4.087462841 | 0.316995579 | -4.087462841 | 0.3109633 | -0.028569152 | 0.21244364  | -4.087462841 | 0.321827997 | -4.087462841 | 0.322490665 |
| BnaC02g10310D | 0            | 0.22451918  | 0            | 0.2263112 | 0            | 0.21244364  | 0            | 0.226982722 | 0            | 0.223935767 |
| BnaC02g10340D | 0            | 0.22451918  | 3.624490865  | 0.2834218 | 2.736965594  | 0.243100321 | 0            | 0.226982722 | 2.736965594  | 0.256833633 |
| BnaC02g13890D | 0            | 0.22451918  | 0            | 0.2263112 | 0            | 0.21244364  | 0            | 0.226982722 | 3.321928095  | 0.277510656 |
| BnaC02g20880D | 0            | 0.22451918  | 0            | 0.2263112 | 0            | 0.21244364  | 0            | 0.226982722 | 0            | 0.223935767 |
| BnaC02g24050D | -0.959358016 | 0.268149635 | -4.544320516 | 0.3401207 | -1.084888898 | 0.261190514 | -1.041820176 | 0.25707588  | -1.959358016 | 0.297373102 |
| BnaC02g25890D | -2.502500341 | 0.250160714 | -2.502500341 | 0.2479504 | 2.502500341  | 0.237869421 | -2.502500341 | 0.273714027 | -2.502500341 | 0.251349554 |
| BnaC02g27990D | -0.075037054 | 0.243225809 | -1.189033824 | 0.4045273 | 0.261627585  | 0.281724436 | -0.754887502 | 0.37037673  | -0.257981178 | 0.29145972  |
| BnaC02g34540D | -1.342003872 | 0.494388231 | 0.452163618  | 0.3425997 | -0.152808843 | 0.262044718 | -0.246455664 | 0.297872856 | -1.466699619 | 0.543242981 |
| BnaC02g42720D | 1.425995312  | 0.713978125 | 2.831033673  | 0.8215484 | 0.492241947  | 0.460360967 | 1.194230973  | 0.675422259 | 0.482571784  | 0.48987504  |
| BnaC02g43170D | -4.36923881  | 0.336391296 | -2.784271309 | 0.290163  | 1.284208429  | 0.316559671 | -1.784271309 | 0.288106749 | -0.494764692 | 0.2516974   |
| BnaC03g03740D | 1.279681072  | 0.662045599 | 2.747364543  | 0.805477  | -0.010011031 | 0.217033886 | 0.487020525  | 0.42704078  | -0.652953982 | 0.504493378 |
| BnaC03g03780D | -0.153951365 | 0.290180616 | 1.037474705  | 0.571053  | -0.714804274 | 0.481599387 | -0.343505173 | 0.358748107 | -0.493496777 | 0.33967218  |
| BnaC03g06170D | 0.188823367  | 0.29669062  | -1.499232627 | 0.5390798 | 0.128254991  | 0.266687802 | -0.96871791  | 0.268675437 | -0.187202993 | 0.409616748 |
| BnaC03g08290D | 0.430634354  | 0.240480468 | -2.938599455 | 0.257659  | 0.38332864   | 0.224836204 | -0.938599455 | 0.247538669 | 0.476438044  | 0.241385308 |
| BnaC03g08880D | 1.037474705  | 0.326794709 | 1.102569734  | 0.3219293 | -1.046293652 | 0.274195111 | 1.066769012  | 0.33557672  | 1.649312912  | 0.429889218 |
| BnaC03g10790D | -1.444784843 | 0.266588732 | 1.575114715  | 0.3204344 | -0.029747343 | 0.21244364  | 2.488577964  | 0.437246821 | 0.908852112  | 0.27936507  |
| BnaC03g23960D | -3.321928095 | 0.275018493 | -0.658963082 | 0.2423738 | 0.707819249  | 0.238873331 | 0.584962501  | 0.250775134 | -0.584962501 | 0.241482176 |
| BnaC03g32420D | -0.577766999 | 0.369564356 | -0.249393495 | 0.2861958 | 0.092545742  | 0.244496188 | 0.538538164  | 0.386817958 | 0.357552005  | 0.349446529 |
| BnaC03g36600D | 0.723959884  | 0.394891067 | 0.482782106  | 0.32268   | 0.611434712  | 0.366284036 | -0.075948853 | 0.254799429 | -0.043816232 | 0.236367959 |
| BnaC03g36610D | 0.402935732  | 0.313596375 | 1.71440947   | 0.5683627 | 0.18097727   | 0.257623992 | 0.47654564   | 0.332774138 | 0.10617719   | 0.254229191 |
| BnaC03g38960D | -1.026967048 | 0.290035313 | -5.169925001 | 0.3931739 | -0.688798312 | 0.26310807  | -1.026967048 | 0.29353059  | -1.08246216  | 0.300992462 |
| BnaC03g39160D | 7.662965013  | 0.70007045  | 4.841302254  | 0.3646725 | 2.662965013  | 0.239348868 | 0            | 0.226982722 | 0            | 0.223935767 |
| BnaC03g50150D | 0.540568381  | 0.281290729 | 1.482016199  | 0.3853385 | -1.964666927 | 0.322362975 | -1.427010141 | 0.316660943 | -0.23236271  | 0.250037426 |
| BnaC03g50570D | 0.49492521   | 0.432920762 | 1.498805857  | 0.6768313 | 1.026390747  | 0.621389447 | 1.214905663  | 0.657255011 | -0.376074344 | 0.40954463  |
| BnaC03g52400D | 0.475379456  | 0.409357498 | 2.917039778  | 0.8092791 | -0.468516381 | 0.393079186 | -0.801656834 | 0.471180083 | -0.100267106 | 0.273690954 |
| BnaC03g53950D | 1.347350692  | 0.360511554 | -4.906890596 | 0.370216  | -4.906890596 | 0.370240234 | 0.062735755  | 0.23086847  | 0.727315424  | 0.295809997 |
| BnaC03g54890D | -6.53915881  | 0.559538906 | -3.124121312 | 0.459172  | -0.118496763 | 0.235639244 | -0.509411468 | 0.301512029 | -1.09069831  | 0.37733365  |
| BnaC03g58370D | -3.4108964   | 0.795094491 | 2.529637246  | 0.7987116 | -0.937715722 | 0.577932914 | 0.841104881  | 0.566295484 | 0.351329011  | 0.471168622 |
| BnaC03g60970D | -1.019091964 | 0.485467523 | -0.901054506 | 0.435195  | -1.044947406 | 0.497906319 | -0.170241139 | 0.286235426 | -0.110323415 | 0.270047073 |
| BnaC03g70990D | 0.148627239  | 0.268010937 | -2.471524691 | 0.5115472 | -0.215184937 | 0.271315474 | -0.212391722 | 0.281427225 | 0.174467243  | 0.27942601  |
| BnaC03g71120D | -0.078002512 | 0.229063193 | -4.247927513 | 0.3211411 | -1.584962501 | 0.266281178 | -4.247927513 | 0.321831766 | -0.703606997 | 0.255607366 |
| BnaC03g71220D | -0.154593348 | 0.303002483 | 2.428249475  | 0.7976087 | 0.208428527  | 0.329167988 | 0.421360248  | 0.424438163 | 0.106066809  | 0.294367977 |
| BnaC03g71470D | 0.207764807  | 0.321233576 | 1.114790899  | 0.6055008 | 0.626456243  | 0.496310191 | 0.698813698  | 0.511393057 | 0.267487534  | 0.368866462 |
| BnaC03g73730D | -2.201638661 | 0.332045423 | 2.049327712  | 0.4597027 | 0.176877762  | 0.23613812  | -0.823122238 | 0.285997658 | -0.801095932 | 0.284903484 |
| BnaC03g74980D | -4.93859455  | 0.383147962 | -2.523561956 | 0.3800154 | -1.61667136  | 0.293978301 | -0.523561956 | 0.262258269 | -2.436099115 | 0.328091426 |
| BnaC04g00680D | 0            | 0.22451918  | 0            | 0.2263112 | 0            | 0.21244364  | 3.415037499  | 0.283188471 | 0            | 0.223935767 |
| BnaC04g11030D | 0            | 0.22451918  | 3.255982783  | 0.4959663 | -3.969626351 | 0.297018652 | -3.969626351 | 0.313622794 | -3.969626351 | 0.31401247  |
| BnaC04g11040D | 0            | 0.22451918  | 2.874469118  | 0.2544626 | 0            | 0.21244364  | 0            | 0.226982722 | 0            | 0.223935767 |
| BnaC04g16940D | 1.880701072  | 0.390001409 | 1.308122295  | 0.3145805 | 1.465663572  | 0.336010427 | -0.070389328 | 0.23154655  | 1.80407979   | 0.398836257 |
| BnaC04g31690D | 0.214443668  | 0.267982317 | 2.822468695  | 0.6990384 | 0.600294154  | 0.334722516 | 1.760357443  | 0.578278559 | 1.777992862  | 0.615317553 |
| BnaC04g36420D | 3.502500341  | 0.281262109 | 0            | 0.2263112 | 0            | 0.21244364  | 0            | 0.226982722 | 0            | 0.223935767 |
| BnaC04g43920D | -2.467778961 | 0.426104741 | -1.091630475 | 0.3385312 | -1.056583528 | 0.346201434 | 0.07566427   | 0.241697299 | -0.315008681 | 0.27709236  |
| BnaC04g48620D | 0            | 0.22451918  | 0            | 0.2263112 | 4.700439718  | 0.351890257 | 0.226982722  | 0.226982722 | 0            | 0.223935767 |
| BnaC04g51650D | -2.502500341 | 0.250160714 | -2.502500341 | 0.2479504 | -2.502500341 | 0.237869421 | -2.502500341 | 0.253714027 | -0.087462841 | 0.223935767 |
| BnaC04g52880D | 1.724365557  | 0.29484866  | 0.68589141   | 0.2450817 | 1.283792966  | 0.258266846 | 1.705256734  | 0.294755451 | 0.798366139  | 0.252382085 |
| BnaC05g00370D | 1.644054158  | 0.25772086  | 1.578646266  | 0.7217364 | 0.333247739  | 0.39864252  | 0.551919946  | 0.490823911 | 0.131063756  | 0.312112526 |
| BnaC05g00890D | 2.874469118  | 0.256930501 | 0            | 0.2263112 | 0            | 0.21244364  | 0            | 0.226982722 | 2.874469118  | 0.258500211 |
| BnaC05g00910D | 2.003160341  | 0.479968033 | 0.347019076  | 0.2550768 | 2.267772325  | 0.522742083 | 1.520256811  | 0.411592078 | -0.309328058 | 0.253463049 |
| BnaC05g00930D | 0            | 0.22451918  | 0            | 0.2263112 | 0            | 0.21244364  | 0            | 0.226982722 | 0            | 0.223935767 |
| BnaC05g00940D | 1.510595055  | 0.649965656 | 0.747797314  | 0.4396267 | -0.041000463 | 0.227555127 | -0.671119144 | 0.405836317 | -0.960132617 | 0.499070943 |
| BnaC05g00970D | -0.087462841 | 0.22451918  | -2.502500341 | 0.2479504 | -2.502500341 | 0.237869421 | -2.502500341 | 0.253714027 | 1.338801913  | 0.264957378 |
| BnaC05g01000D | -0.064130337 | 0.22451918  | 4.283792966  | 0.5353988 | 2.605721061  | 0.352200676 | 0.833990049  | 0.25431285  | 0.833990049  | 0.252439325 |
| BnaC05g01020D | 2.184424571  | 0.41104389  | 4.332382453  | 0.6747618 | -4.196397213 | 0.310820212 | -0.974004791 | 0.264556694 | -4.196397213 | 0.3284789   |
| BnaC05g01030D | 0            | 0.22451918  | 4.142957954  | 0.3140147 | 0            | 0.21244364  | 0            | 0.226982722 | 2.415037499  | 0.247556272 |
| BnaC05g01040D | 0            | 0.22451918  | 6.559695742  | 0.5393594 | 0            | 0.21244364  | 0            | 0.226982722 | 2.223292421  | 0.246453292 |
| BnaC05g09630D | -0.021061616 | 0.22451918  | -0.154328146 | 0.2358    | -0.131244533 | 0.22382569  | -2.301169535 | 0.292770844 | 0.350907162  | 0.251069957 |
| BnaC05g20530D | 1.282989948  | 0.606438673 | 1.082083689  | 0.5315813 | -0.016441147 | 0.218742295 | -0.165843825 | 0.284161559 | 0.276737531  | 0.315676847 |
| BnaC05g21870D | 0.781654412  | 0.292199443 | -1.431339312 | 0.2871403 | -0.367208974 | 0.240559724 | -0.235986311 | 0.252833404 | -0.367208974 | 0.253995826 |
| BnaC05g24890D | 0            | 0.22451918  | 2.321928095  | 0.244965  | 2.321928095  | 0.234239054 | 0.226982722  | 0.226982722 | 0            | 0.223935767 |
| BnaC05g28010D | -1.273018494 | 0.357548258 | 0.965386245  | 0.3671955 | -1.398549716 | 0.359472479 | 0.           |             |              |             |

|               |              |             |              |             |              |             |              |             |              |             |
|---------------|--------------|-------------|--------------|-------------|--------------|-------------|--------------|-------------|--------------|-------------|
| BnaC07g34980D | 0            | 0.22451918  | 2.736965594  | 0.2526947   | 2.736965594  | 0.243100321 | 0            | 0.226982722 | 2.736965594  | 0.256833633 |
| BnaC07g40860D | 1.517680598  | 0.733184508 | 2.714279057  | 0.8157935   | 0.283142995  | 0.366464564 | 0.921296252  | 0.607797034 | 1.835530536  | 0.801450386 |
| BnaC07g41360D | -1.161154792 | 0.306298214 | -1.242074787 | 0.2987953   | 0.314873337  | 0.247397776 | -0.228268988 | 0.25200782  | -0.03562391  | 0.228581053 |
| BnaC07g41390D | -0.125530882 | 0.230485399 | -3.584962501 | 0.2834218   | 1.337869639  | 0.282572035 | 0.2407503827 | 0.392055462 | 2.466699619  | 0.410625594 |
| BnaC07g41850D | -0.521357121 | 0.333485241 | -0.453365618 | 0.3081387   | -1.032789935 | 0.412950439 | -0.793909391 | 0.378035947 | -0.983880335 | 0.429495139 |
| BnaC07g46020D | 1.934904972  | 0.288042904 | 2.901221846  | 0.3417521   | 0            | 0.21244364  | 0            | 0.226982722 | 2.94596016   | 0.372463806 |
| BnaC07g49940D | -1.584962501 | 0.270740868 | 3.330389674  | 0.5233585   | 0.612976877  | 0.247800645 | 1.304854582  | 0.315980662 | 1.762202886  | 0.371732889 |
| BnaC08g07040D | -0.4164841   | 0.370513227 | 1.115410483  | 0.5746548   | 0.379245497  | 0.370654127 | 0.323488796  | 0.349889042 | 0.072742121  | 0.259970851 |
| BnaC08g07270D | 0            | 0.22451918  | 0            | 0.2263112   | 5.64385619   | 0           | 0            | 0.226982722 | 0            | 0.223935767 |
| BnaC08g07470D | 3.662965013  | 0.290878509 | 4.624490865  | 0.3475356   | 2.736965594  | 0.243100321 | 2.736965594  | 0.258914104 | 4.969626351  | 0.395547131 |
| BnaC08g13100D | -2.584962501 | 0.251618144 | 3.029747343  | 0.3573193   | 1.736965594  | 0.270016556 | -0.08246216  | 0.226982722 | 0.830074999  | 0.248835376 |
| BnaC08g15440D | 3.321928095  | 0.275018493 | 4.222392421  | 0.3190364   | 0            | 0.21244364  | 2.415037499  | 0.249922946 | 0            | 0.223935767 |
| BnaC08g21160D | 0.783580178  | 0.479937212 | 1.649841337  | 0.6355586   | -0.321928095 | 0.322061362 | -0.623913482 | 0.404437018 | 0.133488866  | 0.280346261 |
| BnaC08g34030D | 0            | 0.22451918  | 0            | 0.2263112   | 2.584962501  | 0.239348868 | 0.255299148  | 0.255299148 | 3.544320516  | 0.288610906 |
| BnaC08g41360D | 1.50779464   | 0.299715559 | -0.607682577 | 0.2423496   | 2.076815597  | 0.334848005 | -0.04580369  | 0.226982722 | -0.04580369  | 0.223935767 |
| BnaC08g43050D | 0            | 0.22451918  | 4.790076931  | 0.3605402   | 0            | 0.21244364  | 0            | 0.226982722 | 0            | 0.223935767 |
| BnaC08g49760D | 0            | 0.22451918  | 5.073248982  | 0.384645    | 0            | 0.21244364  | 0            | 0.226982722 | 0            | 0.223935767 |
| BnaC08g49770D | 0            | 0.22451918  | 0            | 0.2263112   | 0            | 0.21244364  | 0            | 0.226982722 | 0            | 0.223935767 |
| BnaC09g04330D | 0.286446817  | 0.332113671 | 1.595115217  | 0.6589964   | 0.026249899  | 0.224398094 | 0.035226254  | 0.239104495 | -0.178739476 | 0.301921519 |
| BnaC09g06610D | -2.662965013 | 0.251618144 | -2.662965013 | 0.2496566   | -2.662965013 | 0.239348868 | -2.662965013 | 0.252999148 | -0.160464672 | 0.231936225 |
| BnaC09g06370D | -1.930291028 | 0.513535172 | 0.529965223  | 0.3477447   | -0.63584367  | 0.359437194 | 0.35115062   | 0.320143806 | 0.218305464  | 0.292994206 |
| BnaC09g09210D | 1.558558529  | 0.675662228 | -1.39273205  | 0.5251506   | -0.411724765 | 0.355359911 | 0.155977462  | 0.287657631 | -0.477928854 | 0.401702684 |
| BnaC09g13140D | 4.584962501  | 0.352933795 | 0            | 0.2263112   | 2.938599455  | 0.248216739 | 0            | 0.226982722 | 0            | 0.223935767 |
| BnaC09g18980D | -0.798366139 | 0.307341752 | 0.521050737  | 0.2901498   | -0.810966176 | 0.301520836 | 0.14404637   | 0.251692997 | -0.209227962 | 0.256675121 |
| BnaC09g21000D | 0.729548123  | 0.343649829 | -0.584962501 | 0.243649829 | -0.473931188 | 0.291435503 | 0.232923089  | 0.267324052 | -0.012383724 | 0.257774067 |
| BnaC09g26970D | -6.36923381  | 0.539244954 | -6.36923381  | 0.518077    | -0.754523966 | 0.310613266 | -2.866733469 | 0.435503188 | -2.023458973 | 0.424026472 |
| BnaC09g33190D | -3.115477217 | 0.266122001 | -3.115477217 | 0.2678666   | -0.056583528 | 0.21244364  | -3.115477217 | 0.269941703 | -0.893084796 | 0.245312885 |
| BnaC09g34220D | 0            | 0.22451918  | 3            | 0.2596164   | 0            | 0.21244364  | 0            | 0.226982722 | 0            | 0.223935767 |
| BnaC09g34230D | 0            | 0.22451918  | 2.22392421   | 0.24384     | 0            | 0.21244364  | 0            | 0.226982722 | 0            | 0.223935767 |
| BnaC09g40700D | 0.689659879  | 0.251006112 | -0.047305715 | 0.2263112   | 0.367731785  | 0.228490789 | 0            | 0.226982722 | -0.047305715 | 0.223935767 |
| BnaC09g43200D | 4.297680549  | 0.331045916 | 4.247927513  | 0.3211411   | 5.824428435  | 0.468004773 | 4.345774837  | 0.338317658 | 0            | 0.223935767 |
| BnaC09g43890D | -1.475778584 | 0.690086829 | 0.822787158  | 0.546334    | -0.2065064   | 0.36444266  | -0.210123275 | 0.32644426  | -0.2493731   | 0.370511025 |
| BnaC09g47170D | 0.472614775  | 0.418694301 | 0.913766538  | 0.5392031   | -0.063649804 | 0.243137747 | -0.349953989 | 0.365211878 | -0.540995657 | 0.46305379  |
| BnaC09g47250D | 2.223811698  | 0.782323995 | 3.111895529  | 0.8224532   | -0.761068743 | 0.485605252 | -0.207324973 | 0.3112843   | -0.133816304 | 0.289909824 |
| BnaC09g50530D | 0.215861423  | 0.32678663  | 2.033234938  | 0.7532121   | -0.454823318 | 0.415405175 | 0.082317348  | 0.265164324 | 0.032218736  | 0.24215145  |
| BnaCnn01350D  | 0.584962501  | 0.240680158 | -2.584962501 | 0.2496566   | -0.08246216  | 0.21244364  | 1.187627003  | 0.262348533 | -0.08246216  | 0.223935767 |
| BnaCnn01500D  | 4.297680549  | 0.331045916 | 2.321928095  | 0.244965    | 0            | 0.21244364  | 0            | 0.226982722 | 0            | 0.223935767 |
| BnaCnn01510D  | 2.263498775  | 0.804415883 | 0.747057741  | 0.5178128   | -0.210130285 | 0.322373983 | 0.994256017  | 0.616160749 | 0.037099018  | 0.248875004 |
| BnaCnn01530D  | 0            | 0.22451918  | 0            | 0.2263112   | 0            | 0.21244364  | 0            | 0.226982722 | 0            | 0.223935767 |
| BnaCnn06310D  | 2.938599455  | 0.260714978 | 3.36923381   | 0.2716061   | 3.807354922  | 0.28742867  | 0            | 0.226982722 | 4.169925001  | 0.3284789   |
| BnaCnn09850D  | -0.345842993 | 0.323008031 | 1.731557632  | 0.646714    | 0.273356877  | 0.304633837 | 0.668635788  | 0.430494466 | 1.248099683  | 0.62769805  |
| BnaCnn18420D  | 0.794139303  | 0.296840325 | -1.600392541 | 0.2940157   | -0.773229138 | 0.260734792 | 0.103622631  | 0.236867713 | -0.969626351 | 0.284152753 |
| BnaCnn30350D  | 0            | 0.22451918  | 2.502500341  | 0.2479504   | 5.977279923  | 0.486207246 | 0            | 0.226982722 | 0            | 0.223935767 |
| BnaCnn30500D  | -8.732450113 | 0.815331202 | -2.801712775 | 0.6308011   | -0.459431619 | 0.368892881 | 0.978356321  | 0.548667618 | 0.160345653  | 0.294478055 |
| BnaCnn36980D  | 0.318607737  | 0.267480362 | 0.842458723  | 0.3253527   | 0.517058436  | 0.284542428 | -0.33419039  | 0.266797879 | -0.888354644 | 0.316480415 |
| BnaCnn38230D  | 0            | 0.22451918  | 0            | 0.2263112   | 0            | 0.21244364  | 0            | 0.226982722 | 0            | 0.223935767 |
| BnaCnn43170D  | 0            | 0.22451918  | 0            | 0.2263112   | 0            | 0.21244364  | 0            | 0.226982722 | 0            | 0.223935767 |
| BnaCnn44060D  | 0.376563351  | 0.250063845 | -0.703606997 | 0.2504513   | -0.623436649 | 0.241779386 | -0.584962501 | 0.253953996 | -1.510961919 | 0.277224453 |
| BnaCnn48900D  | 0            | 0.22451918  | 0            | 0.2263112   | 0            | 0.21244364  | 0            | 0.226982722 | 0            | 0.223935767 |
| BnaCnn49350D  | 4.48112669   | 0.343167688 | 6.709658248  | 0.5585856   | 2.874469118  | 0.244608387 | 0            | 0.226982722 | 3.807354922  | 0.303865494 |
| BnaCnn49700D  | -0.073284426 | 0.245678344 | 0.894131365  | 0.4611888   | 0.010171805  | 0.215010656 | 0.163863249  | 0.280057857 | -0.224094717 | 0.300303375 |
| BnaCnn60050D  | 0            | 0.22451918  | 0            | 0.2263112   | 0            | 0.21244364  | 0            | 0.226982722 | 0            | 0.223935767 |
| BnaCnn60710D  | 4.544320516  | 0.348121191 | 3            | 0.2596164   | 0            | 0.21244364  | 5.309855263  | 0.42492911  | 4.564784619  | 0.359917133 |
| BnaCnn63190D  | 0            | 0.22451918  | 0            | 0.2263112   | 4.142957954  | 0.308874036 | 0            | 0.226982722 | 0            | 0.223935767 |
| BnaCnn64100D  | 1.723952287  | 0.659560041 | 1.019496176  | 0.4839573   | 0.623057803  | 0.40443623  | 0.740494406  | 0.437044278 | 0.770721193  | 0.477685019 |
| BnaCnn69540D  | 0            | 0.22451918  | 3.502500341  | 0.2775591   | 0            | 0.21244364  | 0            | 0.226982722 | 0            | 0.223935767 |
| BnaCnn72050D  | 3.502500341  | 0.281262109 | 3.502500341  | 0.2775591   | 0            | 0.21244364  | 0            | 0.226982722 | 3.502500341  | 0.284370707 |

**BnWRKY**

| GeneID        | log2(Cold/Control) | Prob.        | log2(Heat/Control) | Prob.      | log2(Drought/Control) | Prob.       | log2(Salt/Control) | Prob.       | log2(ABA/Control) | Prob.       |             |
|---------------|--------------------|--------------|--------------------|------------|-----------------------|-------------|--------------------|-------------|-------------------|-------------|-------------|
| BnaA01g05060D | 0.226439254        | 0.291763535  | -1.162850476       | 0.4338762  | -1.372445623          | 0.489518387 | -0.995953167       | 0.438429057 | -1.810397514      | 0.561894572 |             |
| BnaA01g05500D | -5.938599455       | 0.486235866  | -2.353636955       | 0.3628914  | 0.053866872           | 0.21990912  | -5.938599455       | 0.49170013  | -1.795641501      | 0.379640882 |             |
| BnaA01g08990D | 0.953457414        | 0.335468844  | -0.249359469       | 0.2480384  | 0.99426363            | 0.334319631 | -0.106915204       | 0.240247103 | 0.326500825       | 0.264105375 |             |
| BnaA01g13440D | 1.701593307        | 0.733699672  | -0.23672179        | 0.3156768  | -0.815153293          | 0.518173853 | -1.709635102       | 0.669548505 | -1.784209585      | 0.710200254 |             |
| BnaA01g15760D | 0.245616336        | 0.316830463  | -1.235150309       | 0.5104772  | -0.096288315          | 0.253399204 | -0.266637701       | 0.31962464  | -0.501177859      | 0.411083518 |             |
| BnaA01g34790D | -0.439117954       | 0.389724013  | -0.37208477        | 0.3528633  | 0.092903995           | 0.257284952 | -0.398698762       | 0.377903584 | -0.609154348      | 0.48016177  |             |
| BnaA02g05730D | -2.807354922       | 0.256930501  | -2.807354922       | 0.2544626  | -2.807354922          | 0.244608387 | -2.807354922       | 0.260578481 | -2.807354922      | 0.258500211 |             |
| BnaA02g10650D | -0.076217787       | 0.2595975026 | 0.249578125        | 0.3156394  | -0.097350599          | 0.25845618  | -0.062565686       | 0.251259291 | -0.240103872      | 0.334447321 |             |
| BnaA02g13630D | 0.1745516          | 0.295297994  | -0.772873248       | 0.421739   | -0.339052273          | 0.345327416 | -0.094074361       | 0.263565258 | -0.153422371      | 0.290668072 |             |
| BnaA02g14710D | 1.881355504        | 0.291400278  | -2.662965013       | 0.2496566  | 1.818161677           | 0.277312515 | -2.662965013       | 0.255299148 | 0                 | 0.223935767 |             |
| BnaA02g21850D | 1.479223247        | 0.508504614  | -0.015375226       | 0.2280659  | -1.70171477           | 0.400595301 | -0.859256024       | 0.337846525 | -0.202143737      | 0.262379355 |             |
| BnaA02g24470D | 0.89616189         | 0.264340942  | 1.399930607        | 0.289177   | 0.852442812           | 0.21518383  | -3.584962501       | 0.291867008 | -1                | 0.253185653 |             |
| BnaA02g31030D | -2.05621601        | 0.526759925  | -1.843409637       | 0.4819582  | -1.134749412          | 0.445960583 | -1.34024439        | 0.470179911 | -1.665264129      | 0.532422329 |             |
| BnaA02g31540D | -0.05246742        | 0.227618972  | 0.872125177        | 0.3029518  | 0.321928095           | 0.245200606 | -1.485426827       | 0.314481401 | -1.597901556      | 0.324313555 |             |
| BnaA02g34400D | 4.392317423        | 0.338183363  | 3.321928095        | 0.2716061  | 3.36923381            | 0.262696379 | 6.470319935        | 0.556668076 | 0                 | 0.223935767 |             |
| BnaA02g35700D | 2.415037499        | 0.246560129  | 0                  | 0.2263112  | 2.321928095           | 0.234239054 | 2.321928095        | 0.249922946 | 0                 | 0.223935767 |             |
| BnaA02g36910D | 1.366408538        | 0.587978618  | 1.806482588        | 0.6393916  | 0.620470602           | 0.401335024 | 0.940809534        | 0.489359875 | 0.556881625       | 0.408454859 |             |
| BnaA03g04120D | -3.906890596       | 0.305339392  | 1.49683159         | 0.3072581  | -0.032421478          | 0.21244364  | 0.983803335        | 0.283067385 | 0.934411658       | 0.28036673  |             |
| BnaA03g05630D | 0.334879271        | 0.275284384  | 0.432749           | 0.44421825 | 0.281455846           | 1.413302448 | 0.461600044        | 0.589579129 | 0.32487623        | 0.223935767 |             |
| BnaA03g10980D | -1.250906832       | 0.441623516  | 0.81262695         | 0.4048487  | -0.98627202           | 0.303933742 | 0.321899604        | 0.306480829 | 0.741194824       | 0.44068125  |             |
| BnaA03g13820D | 1.24394419         | 0.568263676  | 4.600275556        | 0.7595966  | -0.395734582          | 0.26245401  | 0.22714096         | 0.249732556 | -0.03562391       | 0.228851053 |             |
| BnaA03g14060D | -0.389361365       | 0.387647945  | -0.224254684       | 0.3144858  | -0.250050685          | 0.333018511 | -0.080361785       | 0.264433407 | -0.326401571      | 0.391965198 |             |
| BnaA03g17120D | -4.459431619       | 0.343167688  | -4.459431619       | 0.3356301  | -4.459431619          | 0.332505548 | -7.22466024        | 0.305424196 | -1.874469118      | 0.293432315 |             |
| BnaA03g17130D | 0                  | 0.22451918   | 0                  | 0.2263112  | 0                     | 0.21244364  | 1.736965594        | 0.240291134 | 0                 | 0.223935767 |             |
| BnaA03g17820D | 0.704462954        | 0.460640565  | 1.95894984         | 0.7030144  | 0.138368968           | 0.269041266 | -0.193325434       | 0.249156628 | -0.769468234      | 0.474387087 |             |
| BnaA03g19180D | 0                  | 0.22451918   | 0                  | 0.2263112  | 0                     | 0.21244364  | 0                  | 0.226982722 | 0                 | 0.223935767 |             |
| BnaA03g19190D | 0                  | 0.22451918   | 0                  | 0.2263112  | 0                     | 0.21244364  | 0                  | 0.226982722 | 0                 | 0.223935767 |             |
| BnaA03g20910D | -3.459431619       | 0.281262109  | -3.459431619       | 0.2775591  | 1.525461489           | 0.292945771 | -3.459431619       | 0.289733471 | 1.525461489       | 0.310298434 |             |
| BnaA03g21390D | 0                  | 0.22451918   | 0                  | 0.2263112  | 0                     | 0.21244364  | 0.28129293         | 2.807354922 | 0.260578481       | 0           | 0.223935767 |
| BnaA03g25430D | 1.127755547        | 0.437156557  | -1.308631272       | 0.355721   | 0.240597187           | 0.256970197 | 0.637429921        | 0.395483329 | -0.1880723248     | 0.260146976 |             |
| BnaA03g27660D | 0.385431037        | 0.29944917   | 0.432959407        | 0.2958056  | 0.551516018           | 0.325698334 | 0.64096791         | 0.351364085 | 0.057450272       | 0.23802353  |             |
| BnaA03g28720D | -0.42370236        | 0.326440259  | 0.63171076         | 0.377919   | -0.06493762           | 0.213982528 | -0.317615102       | 0.307460636 | -0.17181996       | 0.278452922 |             |
| BnaA03g37950D | 0.6604527          | 0.45293212   | 0.239514872        | 0.304876   | 0.022673501           | 0.221137589 | -0.17178919        | 0.291323224 | 0.199212651       | 0.31460689  |             |
| BnaA03g43640D | 3.370601942        | 0.658818116  | 1.409723699        | 0.3605666  | 0.404390255           | 0.551294515 | 0.05459113         | 0.23086847  | -0.891065628      | 0.285865564 |             |
| BnaA03g46020D | -0.260764232       | 0.251941773  | -0.901221846       | 0.2825656  | -0.288244969          | 0.242358396 | -5.403722186       | 0.433074871 | -2.740571713      | 0.364824404 |             |
| BnaA03g46280D | 0.623851514        | 0.673575182  | -1.407175382       | 0.352387   | 0.219009782           | 0.25119231  | -0.2423681         | 0.266044947 | -0.2423681        | 0.265945877 |             |
| BnaA03g46590D | 0.063702841        | 0.245378932  | 0.587418152        | 0.4035982  | -0.152822574          | 0.270137641 | -0.474409162       | 0.366921207 | -1.650322233      | 0.61551129  |             |
| BnaA03g48030D | 0                  | 0.22451918   | 0                  | 0.2263112  | 0                     | 0.21244364  | 0                  | 0.22450878  | 0                 | 0.223935767 |             |
| BnaA03g48160D | -0.483815777       | 0.277519462  | -1.728928275       | 0.3428198  | 0.521808772           | 0.286468791 | -0.065963262       | 0.236828085 | -0.198413558      | 0.254290834 |             |
| BnaA03g51140D | -0.637429921       | 0.327783208  | 1.238719681        | 0.4632348  | 0.595493168           | 0.344482018 | -0.128416273       | 0.255327768 | -0.746243408      | 0.357433777 |             |
| BnaA03g51590D | 0.327996464        | 0.295890509  | 1.263034406        | 0.4698012  | 0.800192396           | 0.394177763 | -0.360922227       | 0.293709712 | -0.400996661      | 0.304922241 |             |
| BnaA03g59960D | 0                  | 0.22451918   | 3.584962501        | 0.284218   | 1.874469118           | 0.229217302 | 2.24502078         | 1.874469118 | 0.24076597        | 0.223935767 |             |
| BnaA04g00590D | 0.4978017          | 0.29666402   | 2.67956911         | 0.6264464  | 0.070734512           | 0.224032636 | -0.753981571       | 0.307799676 | -0.581324185      | 0.297174434 |             |
| BnaA04g01860D | 0.49410907         | 0.334883229  | 0.384231452        | 0.298584   | 0.53207692            | 0.339059582 | 0.123271375        | 0.257582162 | -0.486782107      | 0.328346807 |             |

|               |               |              |               |            |               |               |               |               |               |              |
|---------------|---------------|--------------|---------------|------------|---------------|---------------|---------------|---------------|---------------|--------------|
| BnaA04g02560D | 2. 997943414  | 0. 831996988 | -4. 035788329 | 0. 7236253 | -2. 06986183  | 0. 666508155  | -0. 132497723 | 0. 280467347  | -1. 186668265 | 0. 601249604 |
| BnaA04g13570D | 0. 870345681  | 0. 541660062 | 1. 834777618  | 0. 7109818 | 0. 040992571  | 0. 231240533  | -0. 235819876 | 0. 320088767  | -1. 137800558 | 0. 603037268 |
| BnaA04g14500D | 0. 256691083  | 0. 33691967  | -0. 318721781 | 0. 341052  | -0. 4425332   | 0. 398446581  | -0. 949534933 | 0. 541008401  | -0. 737160145 | 0. 527330128 |
| BnaA04g17420D | 1. 216745858  | 0. 448036652 | 4. 007377733  | 0. 8034208 | 0. 238404739  | 0. 255307954  | -0. 231815675 | 0. 174925683  | 0. 259182694  |              |
| BnaA04g17690D | -1. 375654093 | 0. 65318213  | 0. 307627148  | 0. 3564034 | -0. 745932031 | 0. 526836979  | -0. 48000235  | 0. 428751013  | -0. 751940765 | 0. 562011254 |
| BnaA04g20400D | -0. 982926487 | 0. 313283754 | -5. 807354922 | 0. 4550222 | -1. 807354922 | 0. 348301719  | -1. 461580085 | 0. 34433011   | -1. 807354922 | 0. 369489503 |
| BnaA04g22040D | 2. 502009711  | 0. 612939871 | 2. 990587676  | 0. 6493448 | -1. 284881102 | 0. 326693438  | -0. 942775131 | 0. 315417063  | -1. 059588796 | 0. 332653052 |
| BnaA04g23470D | -4. 772589504 | 0. 366913681 | -4. 772589504 | 0. 3578168 | -4. 772589504 | 0. 356718271  | -4. 772589504 | 0. 372730195  | -4. 772589504 | 0. 376655571 |
| BnaA04g23480D | 0. 530442512  | 0. 41934376  | 0. 059756983  | 0. 2469574 | -0. 550192164 | 0. 376946176  | -0. 655164112 | 0. 434257107  | -0. 799631822 | 0. 503469654 |
| BnaA04g25840D | 0             | 0. 22451918  | 0             | 0. 2263112 | 0             | 0. 21244364   | 0             | 0. 226982722  | 0             | 0. 223935767 |
| BnaA04g26970D | 0. 844721775  | 0. 382053788 | 2. 097243862  | 0. 5899028 | -0. 765044117 | 0. 322321146  | -0. 188445089 | 0. 262592906  | -1. 392317423 | 0. 408276533 |
| BnaA05g00620D | -1. 014075185 | 0. 287292173 | -2. 516575526 | 0. 3160027 | -0. 599037686 | 0. 256501198  | 0. 324726728  | 0. 260129363  | 0. 493408563  | 0. 27477412  |
| BnaA05g01410D | 1. 213675204  | 0. 401870002 | 0. 701776166  | 0. 305728  | 0. 332319701  | 0. 256408732  | -0. 245756414 | 0. 258938321  | 1. 004338936  | 0. 385961552 |
| BnaA05g01840D | -4. 392317423 | 0. 338183363 | -0. 094636874 | 0. 2311811 | 0. 289506617  | 0. 234527458  | 0. 546282033  | 0. 26544172   | -4. 392317423 | 0. 345725897 |
| BnaA05g07220D | -2. 321928095 | 0. 246506129 | -2. 321928095 | 0. 242965  | 0. 847996907  | 0. 232222428  | -2. 321928095 | 0. 249922946  | 0             | 0. 223935767 |
| BnaA05g11870D | -0. 685226624 | 0. 319551587 | 1. 445928807  | 0. 4720755 | 0. 731858704  | 0. 354113829  | -0. 299168192 | 0. 276370249  | 0. 428988945  | 0. 311700835 |
| BnaA05g12160D | 0. 129096731  | 0. 276370249 | 1. 813859838  | 0. 6969887 | -0. 217743062 | 0. 300459685  | 0. 179311604  | 0. 298055585  | -0. 456291658 | 0. 406345768 |
| BnaA05g34110D | -0. 634580433 | 0. 311965022 | 1. 395004234  | 0. 462917  | -0. 708161366 | 0. 313323381  | -0. 483374629 | 0. 298233911  | -0. 327071398 | 0. 28140521  |
| BnaA05g34850D | 1. 908704166  | 0. 375988499 | 3. 03030276   | 0. 4878283 | 0. 972519264  | 0. 274804942  | -0. 598637438 | 0. 253953996  | -0. 11321061  | 0. 321344006 |
| BnaA06g08890D | 1. 047507666  | 0. 581411374 | 2. 056996277  | 0. 7314277 | -0. 240845487 | 0. 309294533  | 0. 107681644  | 0. 271729367  | -0. 085675115 | 0. 266681197 |
| BnaA06g16820D | -3. 700439718 | 0. 29336847  | -3. 700439718 | 0. 2890842 | 0. 884522783  | 0. 255290341  | -3. 700439718 | 0. 298240516  | 1. 415037499  | 0. 312841241 |
| BnaA06g23750D | -0. 516123624 | 0. 345857991 | -2. 300394933 | 0. 5173285 | -2. 446473193 | 0. 561073391  | 0. 038531238  | 0. 235659058  | -1. 172639386 | 0. 486130191 |
| BnaA06g26680D | 4. 120093845  | 0. 501816284 | 1. 187627003  | 0. 2549315 | -2. 584962501 | 0. 239348868  | 0. 91753784   | 0. 251118391  | 2. 675565605  | 0. 352621174 |
| BnaA06g28100D | -3. 736965594 | 0. 23936847  | 2             | 0. 3415341 | -3. 736965594 | 0. 28129239   | 2. 053111336  | 0. 366110113  | 2. 044394119  | 0. 376994611 |
| BnaA06g29220D | -2. 234169589 | 0. 429446705 | -1. 306925932 | 0. 3604455 | -0. 450661409 | 0. 283670612  | 0. 147976029  | 0. 2552737919 | -0. 450661409 | 0. 300631407 |
| BnaA06g33730D | 1. 345965337  | 0. 602878756 | 0. 930274591  | 0. 4733964 | 1. 008277103  | 0. 533241308  | 0. 454745331  | 0. 364289425  | 0. 196789655  | 0. 297835429 |
| BnaA06g36020D | -4. 058893689 | 0. 314587076 | -4. 058893689 | 0. 3086671 | 1. 286881148  | 0. 300393584  | -1. 473931188 | 0. 292839311  | 0. 35614381   | 0. 247972366 |
| BnaA06g40630D | -4. 297680549 | 0. 331045916 | 0. 560300446  | 0. 2547906 | -1. 560714954 | 0. 265813784  | 0. 872244453  | 0. 284099915  | -0. 673189684 | 0. 255519303 |
| BnaA07g07190D | -0. 652076697 | 0. 247672954 | -3. 874469118 | 0. 2978024 | -0. 704544116 | 0. 238873331  | -0. 067114196 | 0. 23154655   | -0. 101879614 | 0. 32117889  |
| BnaA07g07600D | 0. 929610672  | 0. 251417803 | 1. 465663572  | 0. 2676279 | 0             | 0. 21244364   | 0. 067114196  | 0. 226982722  | -2. 807354922 | 0. 258500211 |
| BnaA07g16850D | 1. 317824227  | 0. 677000775 | 0. 309393416  | 0. 3503668 | -1. 167714687 | 0. 613926169  | 0. 073977297  | 0. 260034697  | -0. 404828614 | 0. 421831519 |
| BnaA07g20110D | 4. 142957954  | 0. 320454225 | 2. 662965013  | 0. 2496566 | 0             | 0. 21244364   | 0             | 0. 226982722  | 0             | 0. 223935767 |
| BnaA07g24310D | 0. 236876668  | 0. 267984519 | -0. 833057623 | 0. 3150472 | 0. 142856758  | 0. 240579538  | 0. 250465732  | 0. 272493307  | 1. 700027107  | 0. 58178784  |
| BnaA07g26870D | 3. 584962501  | 0. 287446282 | 0             | 0. 2263112 | 0             | 0. 21244364   | 0             | 0. 226982722  | 0             | 0. 223935767 |
| BnaA07g27840D | 1. 153709415  | 0. 394100708 | -1. 400879436 | 0. 3235518 | 0. 469485283  | 0. 277187027  | -0. 078951341 | 0. 237884832  | -0. 632695112 | 0. 294013526 |
| BnaA07g28340D | -0. 319583839 | 0. 366380905 | -1. 208807741 | 0. 5931104 | -0. 211463824 | 0. 319135493  | 0. 211747607  | 0. 326024164  | 0. 452526923  | 0. 46317317  |
| BnaA07g35260D | 6. 290791001  | 0. 949762672 | 4. 195475295  | 0. 8383463 | -0. 117753531 | 0. 240438638  | -0. 717600269 | 0. 341732273  | -0. 612518223 | 0. 340210997 |
| BnaA08g08590D | 1. 733213459  | 0. 39567262  | 3. 043826241  | 0. 5434565 | 1. 559761547  | 0. 366629681  | 2. 192645078  | 0. 459238173  | 0. 20894689   | 0. 244093223 |
| BnaA08g10660D | 1. 921997488  | 0. 294667389 | 2. 818161677  | 0. 3441056 | 0. 881355504  | 0. 235687678  | 0. 235687678  | 0. 226982722  | -2. 662965013 | 0. 252928246 |
| BnaA08g12420D | 1. 07091724   | 0. 54543644  | 2. 157966049  | 0. 726298  | -1. 289645115 | 0. 539920832  | -0. 576976517 | 0. 396885678  | -0. 59547286  | 0. 428753214 |
| BnaA08g12810D | -0. 441837559 | 0. 364545634 | 0. 960520807  | 0. 4764059 | -0. 500731248 | 0. 351515992  | 0. 087566966  | 0. 255272729  | -0. 406213649 | 0. 350285322 |
| BnaA08g14350D | -0. 158570504 | 0. 29447145  | -1. 028861004 | 0. 5251198 | 0. 138995024  | 0. 281407411  | 0. 154918366  | 0. 294786273  | -0. 301835655 | 0. 368256631 |
| BnaA08g18040D | -4. 938495955 | 0. 383147962 | -4. 938599455 | 0. 3727918 | -4. 938599455 | 0. 373315809  | -4. 938599455 | 0. 388966227  | 0. 162938571  | 0. 243747687 |
| BnaA08g24160D | 0. 125530882  | 0. 240645585 | 1. 739348245  | 0. 4224017 | 0. 168596904  | 0. 233459703  | -0. 492598483 | 0. 269780989  | -0. 729038678 | 0. 28444556  |
| BnaA09g00120D | 0. 829859268  | 0. 409447761 | -0. 168200321 | 0. 2573092 | 1. 064130337  | 0. 473044137  | -1. 137503524 | 0. 40599572   | -0. 341036918 | 0. 299138751 |
| BnaA09g00350D | 0. 214738849  | 0. 25528814  | -0. 611929548 | 0. 2766036 | -0. 22090893  | 0. 241380905  | -1. 667424661 | 0. 350765261  | -1. 667424661 | 0. 360443306 |
| BnaA09g05000D | 2. 409875794  | 0. 471668164 | -0. 084888898 | 0. 2308685 | -0. 485426827 | 0. 241244408  | 0. 245756414  | 0. 246543556  | -0. 637429921 | 0. 258729173 |
| BnaA09g07010D | -3. 584962501 | 0. 287446282 | -3. 584962501 | 0. 2834218 | 0. 039528364  | 0. 21244364   | 0             | 0. 226982722  | 0. 938599455  | 0. 270696837 |
| BnaA09g13370D | 1. 18422366   | 0. 591527528 | 2. 180073609  | 0. 7273434 | 0. 42722804   | 0. 370768608  | 0. 353473717  | 0. 346190426  | 0. 21758899   | 0. 334748934 |
| BnaA09g16360D | -0. 078002512 | 0. 22451918  | -2. 662965013 | 0. 2496566 | -2. 662965013 | 0. 239348868  | -2. 662965013 | 0. 255299148  | -2. 662965013 | 0. 252892846 |
| BnaA09g17960D | -0. 353636955 | 0. 260772859 | 2. 334419039  | 0. 4338652 | 0. 978938384  | 0. 288809046  | -0. 860596943 | 0. 267178749  | 0. 061400545  | 0. 229884374 |
| BnaA09g24840D | -2. 938599455 | 0. 246714978 | -2. 938599455 | 0. 257569  | -2. 938599455 | 0. 248216739  | 0. 935869636  | 0. 257969636  | -2. 938599455 | 0. 262328719 |
| BnaA09g26610D | 0             | 0. 22451918  | 0             | 0. 2263112 | 3. 736965594  | 0. 28129293   | 0             | 0. 226982722  | 2. 874469118  | 0. 258500211 |
| BnaA09g35840D | -0. 509092843 | 0. 410315175 | -1. 139701498 | 0. 5369575 | -0. 492582521 | 0. 407605058  | 0. 462797015  | 0. 409454366  | 0. 365997724  | 0. 40219143  |
| BnaA09g44440D | 2             | 0. 241636285 | 0             | 0. 2263112 | 0             | 0. 21244364   | 0             | 0. 226982722  | 0             | 0. 223935767 |
| BnaA09g45940D | 0. 29480874   | 0. 34874203  | 0. 499130178  | 0. 4107511 | -0. 425718953 | 0. 392753355  | 0. 303132474  | 0. 35359206   | -0. 093310211 | 0. 27294903  |
| BnaA09g54080D | -3. 874469118 | 0. 303103755 | -3. 874469118 | 0. 2978024 | -0. 067114196 | -0. 935869663 | 0. 257969636  | -0. 093310211 | 0. 303103755  | 0. 230666515 |
| BnaA09g55250D | -0. 184950686 | 0. 263403079 | -0. 518984643 | 0. 3019435 | -0. 695145418 | 0. 332747719  | -1. 189342455 | 0. 400093346  | -0. 860393933 | 0. 374139191 |
| BnaA10g10500D | -0. 79400763  | 0. 432275705 | -0. 521071367 | 0. 3514616 | -0. 269927372 | 0. 304010796  | 0. 203605777  | 0. 296754465  | 0. 024545498  | 0. 232605499 |
| BnaA10g18980D | 0             | 0. 22451918  | 0             | 0. 2263112 | 0             | 0. 21244364   | 2. 736965594  | 0. 258914104  | 0             | 0. 223935767 |
| BnaA10g20210D | 3. 969626351  | 0. 308750749 | 4. 459431619  | 0. 3356031 | 0             | 0. 21244364   | 0             | 0. 226982722  | 0             | 0. 223935767 |
| BnaA09g00020D | -3. 14974712  | 0. 41800081  | -3. 275278002 | 0. 4021452 | -0. 377157616 | 0. 282152594  | -0. 351005328 | 0. 27296444   | -0. 211147664 | 0. 258812832 |
| BnaA09g01980D | -1. 71666818  | 0. 460330145 | 1. 383221052  | 0. 5118818 | 0. 358260308  | 0. 300001761  | -0. 035946696 | 0. 23308975   | 0. 108758315  | 0. 255523706 |
| BnaA09g10540D | -0. 057195402 | 0. 234232449 | 1. 002546682  | 0. 3922712 | 0. 217285531  | 0. 254533006  | 0. 025266759  | 0. 230390732  | -0. 057195402 | 0. 375953274 |
| BnaA09g23990D | 4. 620671402  | 0. 824472067 | 4. 656347134  | 0. 814455  | 0. 913843356  | 0. 32867704   | 0. 520832163  | 0. 28769726   | -0. 36705747  | 0. 262249463 |
| BnaA09g30430D | -0. 970853654 | 0. 25815897  | -4. 029747343 | 0. 3056399 | -0. 029747343 | 0. 21244364   | -0. 029747343 | 0. 226982722  | -0. 970853654 | 0. 252892846 |
| BnaA09g32610D | 2. 451650073  | 0. 687711349 | 1. 59064241   | 0. 5204437 | 0. 029573115  | 0. 217762602  | 0. 432010578  | 0. 341474656  | -0. 512136187 | 0. 318149195 |
| BnaA09g38320D | 0             | 0. 22451918  | 3. 772589504  | 0. 2922413 | 0             | 0. 21244364   | 0             | 0. 226982722  |               |              |

|               |              |             |              |           |              |             |              |              |              |             |
|---------------|--------------|-------------|--------------|-----------|--------------|-------------|--------------|--------------|--------------|-------------|
| BnaC03g32670D | 0.918316202  | 0.499013702 | 0.806409203  | 0.4424315 | -0.050507902 | 0.230060499 | 0.216234134  | 0.297113319  | 0.384100518  | 0.362578816 |
| BnaC03g33830D | -1.695889651 | 0.573107101 | 0.113873777  | 0.2607238 | -0.287193679 | 0.311667811 | -0.348870575 | 0.334271197  | -0.559153314 | 0.413866286 |
| BnaC03g44980D | 0.508417123  | 0.433231181 | 0.391436752  | 0.3725144 | 0.128311408  | 0.27689422  | 0.065296738  | 0.257520519  | 0.115706584  | 0.288212424 |
| BnaC03g49470D | -2.68242831  | 0.399012382 | -2.829269698 | 0.3835641 | -1.261585189 | 0.338211984 | -0.729734025 | 0.352338335  | -0.855264907 | 0.32294186  |
| BnaC03g60600D | -1           | 0.251897742 | 0.395928676  | 0.242026  | -3.662965013 | 0.278871218 | -1           | 0.255034961  | -0.038474148 | 0.223935767 |
| BnaC03g65200D | 0.469485283  | 0.253518088 | -0.893084796 | 0.2535291 | 0.691877705  | 0.254488975 | -1.378511623 | 0.273567667  | -1.452512205 | 0.273318891 |
| BnaC03g67380D | -1.929276676 | 0.516181444 | -3.654416835 | 0.5607498 | -2.246758866 | 0.538798038 | -1.737745219 | 0.50718368   | -3.11937956  | 0.604452869 |
| BnaC03g67520D | 2.199245575  | 0.662965849 | 2.321143808  | 0.650767  | -0.035721922 | 0.220651044 | -0.097297201 | 0.248687872  | 0.293421667  | 0.294002519 |
| BnaC03g67830D | -0.437961633 | 0.370138962 | 0.884234347  | 0.4998085 | -0.393121067 | 0.355511818 | 0.033234282  | 0.236328331  | 0.133993425  | 0.285240322 |
| BnaC04g00310D | 0.684498174  | 0.304847388 | -0.559427409 | 0.267848  | 0.500073603  | 0.27186146  | 0.795529487  | 0.321827997  | 0.237039197  | 0.255127426 |
| BnaC04g01210D | 1.451080249  | 0.569408486 | 1.196397213  | 0.4883912 | 0.014241923  | 0.215010656 | 0.088809267  | 0.250563599  | -0.509674373 | 0.342546849 |
| BnaC04g01540D | 0.912537159  | 0.247939343 | 2.770518154  | 0.3303943 | 2.38827059   | 0.306399486 | 0.866733469  | 0.251118391  | 3.825426495  | 0.479921801 |
| BnaC04g05170D | -1.079434467 | 0.29662017  | -5.222392421 | 0.3967756 | 0.192645078  | 0.233862588 | -5.222392421 | 0.415008894  | -2           | 0.336160132 |
| BnaC04g06800D | 3.686420486  | 0.810551622 | 4.414328859  | 0.8505099 | -0.703018262 | 0.32811124  | -0.106915204 | 0.249988992  | -0.084888898 | 0.245301877 |
| BnaC04g08020D | -3.115477217 | 0.266122001 | -3.115477217 | 0.2627866 | 1.276840205  | 0.261822361 | 1.299560282  | 0.280238385  | 0.584962501  | 0.245143365 |
| BnaC04g13870D | -1.347151511 | 0.567431488 | 0.252142516  | 0.3100321 | 0.086963226  | 0.252170735 | 0.54897685   | 0.427154884  | 0.115114266  | 0.280095283 |
| BnaC04g14500D | 1.117039421  | 0.413065811 | 3.838937567  | 0.7732399 | -1.449307401 | 0.353751777 | 0.373814837  | 0.284262831  | -0.006789166 | 0.223935767 |
| BnaC04g21660D | 0.578267848  | 0.329870284 | 1.431845787  | 0.4712477 | -0.448825813 | 0.283670612 | -0.931520262 | 0.349056853  | -0.369025102 | 0.289130473 |
| BnaC04g23420D | 0.634482637  | 0.521427274 | 0.514573173  | 0.2911493 | 0.682359264  | 0.322305735 | -0.881355504 | 0.320652365  | -0.313666081 | 0.270476681 |
| BnaC04g35770D | 1.21447855   | 0.379172391 | 1.901196988  | 0.6751493 | 0.227344726  | 0.292239071 | -0.07782174  | 0.252452798  | -0.711929043 | 0.44970411  |
| BnaC04g36310D | 0.447295859  | 0.397099229 | -0.013108052 | 0.2299196 | -0.11879726  | 0.262289091 | -0.419120986 | 0.375055039  | -0.40501404  | 0.396242823 |
| BnaC04g38910D | 0.638023744  | 0.40315351  | 2.687267263  | 0.7509643 | -0.831461539 | 0.40428511  | 1.763331971  | 0.666111874  | 0.923151921  | 0.515071859 |
| BnaC04g40940D | 5            | 0.388874212 | 5.662965013  | 0.4402453 | 0.938599455  | 0.293230036 | 3.058893689  | 0.26634656   | 0            | 0.223935767 |
| BnaC04g41050D | 1.995001794  | 0.667049738 | 3.567753211  | 0.8067407 | 0.133350387  | 0.24909516  | 0.734682848  | 0.405178943  | 0.496786689  | 0.364058262 |
| BnaC04g41330D | -1.570951301 | 0.721410582 | 0.216431661  | 0.3309336 | -0.551942022 | 0.488485857 | -0.272169982 | 0.362464335  | -0.739514129 | 0.593462697 |
| BnaC04g47350D | 0.522476767  | 0.39151608  | -0.943868125 | 0.4296228 | -1.055351233 | 0.485302406 | -0.369294963 | 0.334614639  | -1.02815827  | 0.509862975 |
| BnaC04g49810D | 0            | 0.22451918  | 0            | 0.2263112 | 4.700439718  | 0.351890257 | 0.226982722  | 0.3169925001 | 0.270666015  | 0           |
| BnaC04g51410D | 0            | 0.22451918  | 0            | 0.2263112 | 0            | 0.21244364  | 0            | 0.226982722  | 0            | 0.223935767 |
| BnaC05g10200D | 0.992586763  | 0.518671404 | 1.589337622  | 0.6212992 | -0.800797206 | 0.421673007 | 0.13929495   | 0.274283173  | -0.383614435 | 0.347262584 |
| BnaC05g20030D | 0            | 0.22451918  | 0            | 0.2263112 | 0            | 0.21244364  | 0            | 0.226982722  | 0            | 0.223935767 |
| BnaC05g22280D | -0.061400545 | 0.22451918  | -0.125530882 | 0.2317997 | -0.061400545 | 0.21244364  | 1.415037499  | 0.280407904  | 1.772589504  | 0.304574395 |
| BnaC05g22810D | 0            | 0.22451918  | 2.807354922  | 0.2544626 | 0            | 0.21244364  | 3.736965594  | 0.298420516  | 0            | 0.223935767 |
| BnaC05g23680D | 0.265999864  | 0.284080101 | -3.491853096 | 0.493556  | -0.190102883 | 0.255891366 | -2.574315257 | 0.492649001  | -1.606495662 | 0.466712459 |
| BnaC05g47140D | -1.950417971 | 0.344233242 | 1.092794096  | 0.3504681 | 0.884522783  | 0.325876318 | 0.249519599  | 0.258383321  | -0.516015147 | 0.275298091 |
| BnaC05g48590D | -0.044394119 | 0.227088397 | 0.479167837  | 0.2541015 | -1.137503524 | 0.261611011 | 0.415037499  | 0.256113724  | -0.552541023 | 0.255061379 |
| BnaC06g13990D | 0            | 0.22451918  | 3.700439718  | 0.2890842 | 0            | 0.21244364  | 0            | 0.226982722  | 0            | 0.223935767 |
| BnaC06g15910D | 1.270761628  | 0.642339462 | -0.010279592 | 0.2296026 | -1.073544485 | 0.551183997 | 0.630716944  | 0.463738156  | -0.609597385 | 0.467207809 |
| BnaC06g19560D | 0.144389909  | 0.230756191 | 1.479992941  | 0.2646756 | -2.662965013 | 0.239348888 | 0.074000581  | 0.226982722  | -2.662965013 | 0.252892846 |
| BnaC06g25390D | -2.736965594 | 0.255312357 | 0.963474124  | 0.2481441 | 0.9258999419 | 0.232052766 | 0.239205766  | 0.249538892  | -2.419538892 | 0.341192892 |
| BnaC06g30480D | 1.169925001  | 0.259143066 | -2.736965594 | 0.2526947 | 2.137035524  | 0.302082233 | 0.887525271  | 0.254513192  | -2.736965594 | 0.256833633 |
| BnaC06g30870D | -2.321928095 | 0.246506129 | 3.263034406  | 0.3600845 | 2.378511623  | 0.296730248 | 0.226982722  | -0.447458977 | 0.232277467  | 0           |
| BnaC06g40170D | 0.931895554  | 0.417923576 | 1.894363498  | 0.5759185 | 1.047037456  | 0.447891349 | -0.759311753 | 0.34147684   | -1.519928615 | 0.436722885 |
| BnaC07g08810D | -4.772589504 | 0.366913681 | -4.772589504 | 0.3578168 | -1.602664502 | 0.283994241 | -2.450661409 | 0.31495104   | -4.772589504 | 0.223935767 |
| BnaC07g09430D | 0            | 0.22451918  | 2.736965594  | 0.2526947 | 0            | 0.21244364  | 2.736965594  | 0.258914104  | 0            | 0.223935767 |
| BnaC07g19090D | 0            | 0.22451918  | -0.160464672 | 0.23213   | 0.144389909  | 0.219651538 | -0.078002512 | 0.226982722  | 1.752072487  | 0.28952235  |
| BnaC07g22240D | 1.19064291   | 0.546512293 | 2.363577527  | 0.714348  | 0.53722989   | 0.373474321 | 0.223002054  | 0.291404681  | 0.12268252   | 0.265932668 |
| BnaC07g27240D | 1.661246086  | 0.511412871 | 2.50326814   | 0.614815  | -0.448052557 | 0.272590176 | -1.328470941 | 0.359749815  | -0.136850868 | 0.250004403 |
| BnaC07g27510D | -5.87469118  | 0.480199197 | -1           | 0.3056422 | -0.745186101 | 0.289401265 | -1.459431619 | 0.346670365  | -1.486098929 | 0.286098929 |
| BnaC07g27590D | 1.321928095  | 0.255801103 | -0.106915204 | 0.2263112 | -2.22392421  | 0.233252756 | -2.22392421  | 0.248806756  | 0.777607579  | 0.241512998 |
| BnaC07g30300D | 3.683452364  | 0.68361205  | -0.690671942 | 0.3631059 | -2.353636955 | 0.309512487 | -0.294743266 | 0.252538395  | -2.275634443 | 0.323538607 |
| BnaC07g35130D | 3.689299161  | 0.73461552  | 2.44625623   | 0.5443545 | -0.175086707 | 0.233613812 | 0.402098444  | 0.274336061  | -0.485426827 | 0.272136655 |
| BnaC07g38350D | -4.169925001 | 0.322490665 | -1.506959989 | 0.2677379 | 0.394859617  | 0.237957484 | -0.026967048 | 0.226982722  | 0.704544116  | 0.269094103 |
| BnaC07g38550D | 1.561402711  | 0.562753179 | 0.127067462  | 0.2513584 | -1.461277678 | 0.421573937 | -0.572105808 | 0.326587763  | -0.451153461 | 0.316310895 |
| BnaC07g38840D | -0.340221253 | 0.353360897 | -0.929747804 | 0.4890671 | -0.664886045 | 0.458353147 | -0.110685798 | 0.273629311  | -0.447066353 | 0.418799075 |
| BnaC07g40660D | -0.797183117 | 0.35868206  | -1.489515715 | 0.4909515 | 0.123828587  | 0.244412448 | -0.12429411  | 0.256503399  | -0.821029859 | 0.38009     |
| BnaC07g42990D | -0.21009449  | 0.289727095 | 0.776161531  | 0.4397623 | -0.186576242 | 0.275973969 | -0.405086033 | 0.340233013  | -0.378196315 | 0.348926961 |
| BnaC07g43320D | 0.839145899  | 0.499557487 | 1.325053154  | 0.595629  | 0.03330359   | 0.224398094 | -0.120398868 | 0.27021054   | -0.535872424 | 0.341073726 |
| BnaC07g43490D | 1.908584397  | 0.745211614 | 1.162136199  | 0.589687  | -0.613444268 | 0.436617176 | -0.392963046 | 0.36718007   | -1.24346572  | 0.612470939 |
| BnaC07g47230D | -4.321928095 | 0.337071348 | -4.321928095 | 0.3266016 | -4.321928095 | 0.321880834 | -4.321928095 | 0.338317658  | -4.321928095 | 0.340140547 |
| BnaC07g49530D | 0.549687026  | 0.265109285 | 2.453717967  | 0.4482348 | -4.52356156  | 0.337335562 | 2.679378103  | 0.510386946  | 0.549687026  | 0.267431928 |
| BnaC08g11240D | 5.209453366  | 0.409434552 | 5.68182404   | 0.440952  | 4.169925001  | 0.310802012 | 4.584962501  | 0.538510339  | 0            | 0.223935767 |
| BnaC08g12240D | -0.496241532 | 0.446724524 | -0.984227212 | 0.5674733 | -0.123998399 | 0.281550513 | 0.222356459  | 0.33628342   | -0.173106665 | 0.327246028 |
| BnaC08g18410D | 2            | 0.241638285 | 1.874469118  | 0.2401326 | 0            | 0.21244364  | 0            | 0.226982722  | 0            | 0.223935767 |
| BnaC08g27340D | -0.195084838 | 0.327164571 | -1.044346651 | 0.5942002 | -1.095770152 | 0.648237434 | 0.191244046  | 0.325923217  | 0.138055791  | 0.313957431 |
| BnaC08g29410D | 6.1497471    | 0.51217179  | 6.215937399  | 0.4997556 | 6.05166212   | 0.494689845 | 3.36923381   | 0.279293917  | 0            | 0.223935767 |
| BnaC08g32160D | -2.807354922 | 0.256930501 | -2.807354922 | 0.2544626 | -2.807354922 | 0.244608387 | -2.807354922 | 0.26078481   | -2.807354922 | 0.258500211 |
| BnaC08g40010D | -0.110644064 | 0.272310578 | 0.641142534  | 0.4581638 | 0.28862612   | 0.346820071 | 0.233587509  | 0.326070397  | 0.062181995  | 0.257769294 |
| BnaC09g03790D | 2.274362412  | 0.3748591   | 1.477047162  | 0.294969  | 1.909487707  | 0.333232062 | -3.624490865 | 0.291867008  | 1.490968353  | 0.313180281 |
| BnaC09g04560D | 0.37989556   | 0.328192698 | -0.214572917 | 0.2738363 | -0.651436779 | 0.366706735 | -0.109329757 | 0.258579467  | 0.497219606  | 0.381487988 |
| BnaC09g06700D | 0            | 0.22451918  | 0            | 0.2263112 | 0            | 0.21244364  | 0            | 0.226982722  | 0            | 0.223935767 |
| BnaC09g13680D | 1.60319434   | 0.663582285 | 2.41666613   | 0.7459734 | 0.664793524  | 0.440923421 | 0.943126745  | 0.51930956   | 0.475668329  | 0.405599812 |
| BnaC09g17450D | -1.98550043  | 0.376637958 | -3.541893779 | 0.4003773 | 0.028854863  | 0.215717355 | -0.325575872 | 0.268708831  | -1.652076697 |             |
